# Supplementary material
Source: publisher figshare collection journal article supplement (https://acs.figshare.com/ndownloader/files/6407346)
Supplement: Supplementary file 1 [file 6407346]

#\#CIF_1.1
 
#  CIF produced by WinGX routine CIF_UPDATE
#  Created on 2015-06-12 at 10:32:30
#  Using CIFtbx version 2.6.2 16 Jun 1998
 
#  Dictionary name : cif_core.dic
#  Dictionary vers : 2.4
#  Request file    : c:\wingx\files\archive.reqdat
#  CIF files read  : jmg_b_135_0m apexiitemplate
 
#------------------ SECTION 1. GLOBAL INFORMATION ---------------------------#
 
data_global
 
#------------------ AUDIT DETAILS -------------------------------------------#
 
_audit_creation_date            2015-06-12
_audit_creation_method          'WinGX routine CIF_UPDATE'
_audit_conform_dict_name        cif_core.dic
_audit_conform_dict_version     2.4
_audit_conform_dict_location    ftp://ftp.iucr.org/pub/cif_core.dic
_audit_update_record            ?
 
#------------------ AUTHOR DETAILS -------------------------------------------#
 
# Name and address of author for correspondence
 
_publ_contact_author_name      'Werner Kaminsky'
_publ_contact_author_address
;
Department of Chemistry
University of Washington
Seattle
Washington, 98195, USA
;
_publ_contact_author_email       kaminsky@chem.washington.edu
_publ_contact_author_fax         '00(206)6858665'
_publ_contact_author_phone       '00(206)5437585'
 
 
_publ_requested_journal 'Journal title here'
_publ_section_title
;
title here
;
 
loop_
_publ_author_name
_publ_author_address
'Jonathan Goldberge'
;
Department of Chemistry Univ. of Washington Seattle, WA 98195 USA
;
'Werner Kaminsky'
;
Department of Chemistry Univ. of Washington Seattle, WA 98195 USA
;
'Sarah Flowers'
;
Department of Chemistry Univ. of Washington Seattle, WA 98195 USA
;
'Mike Heinekey'
;
Department of Chemistry Univ. of Washington Seattle, WA 98195 USA
;
 
_publ_section_abstract
;
Abstract here
;
_publ_section_comment
;
Details and comments here
;
 
_publ_section_exptl_prep
;
details of preparation here
;
 
_publ_section_exptl_refinement
;
 All H atoms were initially located in a difference Fourier map and were
 refined with a riding  model. H atoms were placed in geometrically
 idealised positions and constrained to ride on their parent atoms with
 C---H distances in the range 0.95-1.00 \%A. U~iso~ values were fixed
 such that they were 1.2U~eq~ of their parent atom U~eq~ for CH's and
 1.5U~eq~ of their parent atom U~eq~ in case of methyl groups.
;
 
 
# Insert blank lines between references
 
_publ_section_references
;
 
 
Bruker (2007) APEX2 (Version 2.1-4), SAINT (version 7.34A), SADABS
(version 2007/4), BrukerAXS Inc, Madison, Wisconsin, USA.
 
Flack H. D. & Bernardinelli, G. (71999). Acta Cryst. A55, 908-915.
 
Flack H. D. & Bernardinelli, G. (2000). J. Appl. Cryst. 33, 1143-1148.
 
Cambridge Structural Database: Allen, F. R. (2002). Acta Cryst. B58, 380-388.
 
CrysAlis CCD, CrysAlis RED and associated programs: Oxford Diffraction (2006).
Program name(s). Oxford Diffraction Ltd, Abingdon, England.
 
COLLECT: Nonius [or Hooft, R. W. W.] (1998). COLLECT. Nonius BV, Delft,
The Netherlands.
 
DENZO/SCALEPACK:  Otwinowski, Z. & Minor, W. (1997). Methods in Enzymology,
Vol. 276, Macromolecular Crystallography, Part A, edited by C. W. Carter Jr
& R. M. Sweet, pp. 307-326. New York: Academic Press.
 
DIRDIF99: Beurskens, P.T., Beurskens, G., de Gelder, R., Garci\'ia-Granda,
S., Gould, R.O., Israel, R. & Smits, J.M.M. (1999) The DIRDIF-99 program
system, Technical Report of the Crystallography Laboratory, University of
Nijmegen, The Netherlands.
 
ORTEP-3: Farrugia, L. J. (1997). J. Appl. Cryst. 30, 565.
 
PARST: Nardelli, M. (1995). J. Appl. Cryst. 28, 659.
 
PLATON: Spek, A. L. (2003). J. Appl. Cryst. 36, 7-13.
 
publCIF: Westrip, S. P. (2008). publCIF. In preparation.
 
SADABS, TWINABS: Bruker (2001). Program name. Bruker AXS Inc., Madison,
Wisconsin, USA. or Sheldrick, G. M. (1996). Program name. University of
G�ttingen, Germany.
 
SHELX Sheldrick, G. M. (2008). Acta Cryst. A64, 112-122.
 
SIR97: Altomare, A., Burla, M. C., Camalli, M., Cascarano, G. L.,
Giacovazzo, C., Guagliardi, A., Moliterni, A. G. G., Polidori, G. &
Spagna, R. (1999). J. Appl. Cryst. 32, 115-119.
 
SIR2002: Burla, M. C., Camalli, M., Carrozzini, B., Cascarano, G. L.,
Giacovazzo, C., Polidori, G. & Spagna, R. (2003). J. Appl. Cryst. 36, 1103.
 
WinGX: Farrugia, L. J. (1999). J. Appl. Cryst. 32, 837-838.
;
 
#------------------  SECTION 2. COMPOUND(S) DETAILS -------------------------#

data_complex_trans_5

_audit_creation_method            'SHELXL-2014/7'
_shelx_SHELXL_version_number      '2014/7'
_chemical_name_systematic         complex_trans_5
_chemical_name_common             complex_trans_5
_chemical_melting_point           ?
_chemical_formula_moiety          'C19 H33 Ir O3 P2' 
_chemical_formula_sum
 'C19 H33 Ir O3 P2' 
_chemical_formula_weight          563.59

loop_
 _atom_type_symbol
 _atom_type_description
 _atom_type_scat_dispersion_real
 _atom_type_scat_dispersion_imag
 _atom_type_scat_source
 'C'  'C'   0.0033   0.0016
 'International Tables Vol C Tables 4.2.6.8 and 6.1.1.4'
 'H'  'H'   0.0000   0.0000
 'International Tables Vol C Tables 4.2.6.8 and 6.1.1.4'
 'O'  'O'   0.0106   0.0060
 'International Tables Vol C Tables 4.2.6.8 and 6.1.1.4'
 'P'  'P'   0.1023   0.0942
 'International Tables Vol C Tables 4.2.6.8 and 6.1.1.4'
 'Ir'  'Ir'  -1.4442   7.9887
 'International Tables Vol C Tables 4.2.6.8 and 6.1.1.4'
 
_space_group_crystal_system       triclinic
_space_group_IT_number            2
_space_group_name_H-M_alt         'P -1'
_space_group_name_Hall            '-P 1'
 
_shelx_space_group_comment
;
The symmetry employed for this shelxl refinement is uniquely defined
by the following loop, which should always be used as a source of
symmetry information in preference to the above space-group names.
They are only intended as comments.
;
 
loop_
 _space_group_symop_operation_xyz
 'x, y, z'
 '-x, -y, -z'
 
_cell_length_a                    7.8388(5)
_cell_length_b                    9.9117(7)
_cell_length_c                    15.1225(10)
_cell_angle_alpha                 105.935(3)
_cell_angle_beta                  92.176(3)
_cell_angle_gamma                 107.411(3)
_cell_volume                      1068.76(13)
_cell_formula_units_Z             2
_cell_measurement_temperature     100(2)
_cell_measurement_reflns_used     46232
_cell_measurement_theta_min       2
_cell_measurement_theta_max       20
 
_exptl_crystal_description              piece
_exptl_crystal_colour                   colorless
_exptl_crystal_density_meas       ?
_exptl_crystal_density_method     'not measured'
_exptl_crystal_density_diffrn     1.751          
_exptl_crystal_F_000              556
_exptl_transmission_factor_min    ?
_exptl_transmission_factor_max    ?
_exptl_crystal_size_max           0.180
_exptl_crystal_size_mid           0.150
_exptl_crystal_size_min           0.100
_exptl_absorpt_coefficient_mu     6.411
_shelx_estimated_absorpt_T_min    0.392
_shelx_estimated_absorpt_T_max    0.567
_exptl_absorpt_correction_type    multi-scan
_exptl_absorpt_correction_T_min   0.392
_exptl_absorpt_correction_T_max   0.567
_exptl_absorpt_process_details    '(SADABS; Bruker, 2007)'
_exptl_absorpt_special_details    ?
_diffrn_ambient_temperature       100(2)
_diffrn_radiation_wavelength      0.71073
_diffrn_radiation_type            MoK\a
_diffrn_source                    'fine-focus sealed tube'
_diffrn_measurement_device_type   'Bruker APEXII CCD area-detector'
_diffrn_measurement_method        '\f and \w scans'
_diffrn_detector_area_resol_mean  ?
_diffrn_reflns_number             46232
_diffrn_reflns_av_unetI/netI      0.0179
_diffrn_reflns_av_R_equivalents   0.0274
_diffrn_reflns_limit_h_min        -10
_diffrn_reflns_limit_h_max        10
_diffrn_reflns_limit_k_min        -13
_diffrn_reflns_limit_k_max        13
_diffrn_reflns_limit_l_min        -20
_diffrn_reflns_limit_l_max        20
_diffrn_reflns_theta_min          2.257
_diffrn_reflns_theta_max          28.421
_diffrn_reflns_theta_full         25.000
_diffrn_measured_fraction_theta_max   0.993
_diffrn_measured_fraction_theta_full  0.998
_diffrn_reflns_Laue_measured_fraction_max    0.993
_diffrn_reflns_Laue_measured_fraction_full   0.998
_diffrn_reflns_point_group_measured_fraction_max   0.993
_diffrn_reflns_point_group_measured_fraction_full  0.998
_reflns_number_total              5353
_reflns_number_gt                 5144
_reflns_threshold_expression      'I > 2\s(I)'
_reflns_Friedel_coverage          0.000
_reflns_Friedel_fraction_max      .
_reflns_Friedel_fraction_full     .
 
_reflns_special_details
;
 Reflections were merged by SHELXL according to the crystal
 class for the calculation of statistics and refinement.
 
 _reflns_Friedel_fraction is defined as the number of unique
 Friedel pairs measured divided by the number that would be
 possible theoretically, ignoring centric projections and
 systematic absences.
;
 
 
_computing_data_collection              'APEX2 (Bruker, 2007)'
_computing_cell_refinement              'SAINT (Bruker, 2007)'
_computing_data_reduction               'SAINT (Bruker, 2007)'
_computing_structure_solution           'SHELXS97 (Sheldrick, 1997)'
_computing_structure_refinement 'SHELXL-2014/7 (Sheldrick, 2014)'
_computing_molecular_graphics           'ORTEP-3 for Windows (Farrugia, 1997)'
_computing_publication_material         'SHELXL-14 (Sheldrick, 2014)'

_refine_ls_structure_factor_coef  Fsqd
_refine_ls_matrix_type            full
_refine_ls_weighting_scheme       calc
_refine_ls_weighting_details
'w=1/[\s^2^(Fo^2^)+(0.0112P)^2^+0.4789P] where P=(Fo^2^+2Fc^2^)/3'
_atom_sites_solution_primary      ?
_atom_sites_solution_secondary    ?
_atom_sites_solution_hydrogens    mixed
_refine_ls_hydrogen_treatment     mixed
_refine_ls_extinction_method      none
_refine_ls_extinction_coef        .
_refine_ls_number_reflns          5353
_refine_ls_number_parameters      242
_refine_ls_number_restraints      0
_refine_ls_R_factor_all           0.0143
_refine_ls_R_factor_gt            0.0132
_refine_ls_wR_factor_ref          0.0271
_refine_ls_wR_factor_gt           0.0268
_refine_ls_goodness_of_fit_ref    1.046
_refine_ls_restrained_S_all       1.046
_refine_ls_shift/su_max           0.002
_refine_ls_shift/su_mean          0.000
 
loop_
 _atom_site_label
 _atom_site_type_symbol
 _atom_site_fract_x
 _atom_site_fract_y
 _atom_site_fract_z
 _atom_site_U_iso_or_equiv
 _atom_site_adp_type
 _atom_site_occupancy
 _atom_site_site_symmetry_order  
 _atom_site_calc_flag
 _atom_site_refinement_flags_posn
 _atom_site_refinement_flags_adp
 _atom_site_refinement_flags_occupancy
 _atom_site_disorder_assembly
 _atom_site_disorder_group
C1 C 0.8370(2) 0.04190(18) 0.23273(11) 0.0112(3) Uani 1 1 d . . . . .
C2 C 0.7254(2) -0.01097(19) 0.14904(11) 0.0140(3) Uani 1 1 d . . . . .
C3 C 0.5818(2) -0.1423(2) 0.12389(12) 0.0177(4) Uani 1 1 d . . . . .
H3 H 0.5074 -0.1747 0.0661 0.021 Uiso 1 1 calc R U . . .
C4 C 0.5505(2) -0.2248(2) 0.18598(12) 0.0186(4) Uani 1 1 d . . . . .
H4 H 0.4534 -0.3154 0.1701 0.022 Uiso 1 1 calc R U . . .
C5 C 0.6583(2) -0.17738(19) 0.27094(12) 0.0161(3) Uani 1 1 d . . . . .
H5 H 0.6366 -0.2346 0.3129 0.019 Uiso 1 1 calc R U . . .
C6 C 0.7981(2) -0.04435(18) 0.29261(11) 0.0124(3) Uani 1 1 d . . . . .
C7 C 1.0912(2) 0.25860(19) 0.50829(11) 0.0150(3) Uani 1 1 d . . . . .
H7 H 1.0992 0.1959 0.5490 0.018 Uiso 1 1 calc R U . . .
C8 C 0.9164(2) 0.2960(2) 0.52018(12) 0.0194(4) Uani 1 1 d . . . . .
H8A H 0.9202 0.3534 0.5847 0.029 Uiso 1 1 calc R U . . .
H8B H 0.8138 0.2042 0.5042 0.029 Uiso 1 1 calc R U . . .
H8C H 0.9031 0.3546 0.4792 0.029 Uiso 1 1 calc R U . . .
C9 C 1.2558(3) 0.3988(2) 0.53924(13) 0.0238(4) Uani 1 1 d . . . . .
H9A H 1.2601 0.4560 0.4953 0.036 Uiso 1 1 calc R U . . .
H9B H 1.3657 0.3713 0.5411 0.036 Uiso 1 1 calc R U . . .
H9C H 1.2471 0.4591 0.6012 0.036 Uiso 1 1 calc R U . . .
C10 C 1.2687(2) 0.0675(2) 0.39304(12) 0.0176(4) Uani 1 1 d . . . . .
H10 H 1.2780 0.0489 0.4545 0.021 Uiso 1 1 calc R U . . .
C11 C 1.2210(3) -0.0813(2) 0.31686(13) 0.0232(4) Uani 1 1 d . . . . .
H11A H 1.2183 -0.0647 0.2559 0.035 Uiso 1 1 calc R U . . .
H11B H 1.1024 -0.1457 0.3225 0.035 Uiso 1 1 calc R U . . .
H11C H 1.3120 -0.1288 0.3234 0.035 Uiso 1 1 calc R U . . .
C12 C 1.4520(3) 0.1692(3) 0.38302(17) 0.0347(5) Uani 1 1 d . . . . .
H12A H 1.5421 0.1186 0.3823 0.052 Uiso 1 1 calc R U . . .
H12B H 1.4880 0.2604 0.4354 0.052 Uiso 1 1 calc R U . . .
H12C H 1.4434 0.1940 0.3249 0.052 Uiso 1 1 calc R U . . .
C13 C 0.7945(2) 0.3652(2) 0.12785(12) 0.0190(4) Uani 1 1 d . . . . .
H13 H 0.7690 0.3650 0.0625 0.023 Uiso 1 1 calc R U . . .
C14 C 0.6149(3) 0.3160(3) 0.16538(14) 0.0295(5) Uani 1 1 d . . . . .
H14A H 0.6376 0.3079 0.2276 0.044 Uiso 1 1 calc R U . . .
H14B H 0.5396 0.2194 0.1241 0.044 Uiso 1 1 calc R U . . .
H14C H 0.5527 0.3891 0.1684 0.044 Uiso 1 1 calc R U . . .
C15 C 0.9053(3) 0.5233(2) 0.18628(13) 0.0239(4) Uani 1 1 d . . . . .
H15A H 0.8399 0.5916 0.1813 0.036 Uiso 1 1 calc R U . . .
H15B H 1.0221 0.5527 0.1635 0.036 Uiso 1 1 calc R U . . .
H15C H 0.9247 0.5263 0.2513 0.036 Uiso 1 1 calc R U . . .
C16 C 1.0508(2) 0.23176(19) 0.03003(11) 0.0150(3) Uani 1 1 d . . . . .
H16 H 1.1127 0.1565 0.0282 0.018 Uiso 1 1 calc R U . . .
C17 C 0.9341(3) 0.1817(2) -0.06380(12) 0.0200(4) Uani 1 1 d . . . . .
H17A H 0.8791 0.2570 -0.0674 0.030 Uiso 1 1 calc R U . . .
H17B H 0.8392 0.0876 -0.0704 0.030 Uiso 1 1 calc R U . . .
H17C H 1.0093 0.1682 -0.1137 0.030 Uiso 1 1 calc R U . . .
C18 C 1.1990(2) 0.3794(2) 0.04413(12) 0.0203(4) Uani 1 1 d . . . . .
H18A H 1.2794 0.3679 -0.0035 0.031 Uiso 1 1 calc R U . . .
H18B H 1.2683 0.4105 0.1057 0.031 Uiso 1 1 calc R U . . .
H18C H 1.1445 0.4545 0.0392 0.031 Uiso 1 1 calc R U . . .
C19 C 1.2405(2) 0.4197(2) 0.29768(11) 0.0156(3) Uani 1 1 d . . . . .
O1 O 0.90674(15) 0.00759(13) 0.37788(8) 0.0135(2) Uani 1 1 d . . . . .
O2 O 0.76216(16) 0.07307(13) 0.08729(8) 0.0175(3) Uani 1 1 d . . . . .
O3 O 1.35408(18) 0.53093(15) 0.31573(9) 0.0248(3) Uani 1 1 d . . . . .
P1 P 1.08950(6) 0.15100(5) 0.38867(3) 0.01113(8) Uani 1 1 d . . . . .
P2 P 0.92010(6) 0.23536(5) 0.12806(3) 0.01233(9) Uani 1 1 d . . . . .
Ir1 Ir 1.04908(2) 0.23764(2) 0.26649(2) 0.00978(2) Uani 1 1 d . . . . .
H1 H 0.921(3) 0.319(2) 0.3214(16) 0.035(6) Uiso 1 1 d . . . . .
H2 H 1.162(3) 0.144(2) 0.2090(15) 0.035(6) Uiso 1 1 d . . . . .
 
loop_
 _atom_site_aniso_label
 _atom_site_aniso_U_11
 _atom_site_aniso_U_22
 _atom_site_aniso_U_33
 _atom_site_aniso_U_23
 _atom_site_aniso_U_13
 _atom_site_aniso_U_12
C1 0.0102(8) 0.0083(8) 0.0132(8) 0.0022(6) 0.0015(6) 0.0009(6)
C2 0.0141(8) 0.0138(9) 0.0133(8) 0.0042(6) 0.0019(6) 0.0035(7)
C3 0.0138(8) 0.0160(9) 0.0166(8) 0.0002(7) -0.0019(6) -0.0003(7)
C4 0.0133(8) 0.0127(9) 0.0235(9) 0.0023(7) 0.0011(7) -0.0019(7)
C5 0.0160(9) 0.0119(9) 0.0202(9) 0.0070(7) 0.0040(7) 0.0020(7)
C6 0.0111(8) 0.0114(8) 0.0132(8) 0.0020(6) 0.0002(6) 0.0031(7)
C7 0.0204(9) 0.0153(9) 0.0096(8) 0.0047(6) 0.0001(6) 0.0055(7)
C8 0.0235(10) 0.0210(10) 0.0145(8) 0.0046(7) 0.0031(7) 0.0088(8)
C9 0.0243(10) 0.0206(10) 0.0174(9) 0.0000(7) -0.0025(7) 0.0002(8)
C10 0.0170(9) 0.0200(10) 0.0176(9) 0.0067(7) 0.0002(7) 0.0080(8)
C11 0.0269(10) 0.0244(11) 0.0212(9) 0.0042(8) 0.0036(8) 0.0145(9)
C12 0.0154(10) 0.0344(13) 0.0518(14) 0.0093(11) 0.0032(9) 0.0078(9)
C13 0.0225(9) 0.0252(10) 0.0143(8) 0.0083(7) 0.0027(7) 0.0128(8)
C14 0.0247(11) 0.0431(13) 0.0280(11) 0.0136(9) 0.0084(8) 0.0182(10)
C15 0.0367(11) 0.0207(10) 0.0196(9) 0.0066(8) 0.0057(8) 0.0159(9)
C16 0.0189(9) 0.0152(9) 0.0121(8) 0.0044(6) 0.0034(6) 0.0066(7)
C17 0.0259(10) 0.0199(10) 0.0120(8) 0.0032(7) 0.0015(7) 0.0057(8)
C18 0.0196(9) 0.0215(10) 0.0186(9) 0.0067(7) 0.0051(7) 0.0037(8)
C19 0.0192(9) 0.0174(9) 0.0118(8) 0.0070(7) 0.0008(6) 0.0056(8)
O1 0.0134(6) 0.0114(6) 0.0142(6) 0.0064(5) -0.0007(4) 0.0000(5)
O2 0.0185(6) 0.0161(6) 0.0126(6) 0.0053(5) -0.0038(5) -0.0021(5)
O3 0.0221(7) 0.0172(7) 0.0262(7) 0.0073(6) -0.0026(5) -0.0065(6)
P1 0.0117(2) 0.0098(2) 0.01093(19) 0.00415(16) -0.00046(15) 0.00147(17)
P2 0.0138(2) 0.0124(2) 0.00968(19) 0.00408(16) -0.00021(15) 0.00217(17)
Ir1 0.01035(3) 0.00855(4) 0.00879(3) 0.00322(2) -0.00057(2) 0.00032(2)
 
_geom_special_details
;
 All esds (except the esd in the dihedral angle between two l.s. planes)
 are estimated using the full covariance matrix.  The cell esds are taken
 into account individually in the estimation of esds in distances, angles
 and torsion angles; correlations between esds in cell parameters are only
 used when they are defined by crystal symmetry.  An approximate (isotropic)
 treatment of cell esds is used for estimating esds involving l.s. planes.
;
 
loop_
 _geom_bond_atom_site_label_1
 _geom_bond_atom_site_label_2
 _geom_bond_distance
 _geom_bond_site_symmetry_2
 _geom_bond_publ_flag
C1 C2 1.385(2) . ?
C1 C6 1.391(2) . ?
C1 Ir1 2.0614(16) . ?
C2 C3 1.387(2) . ?
C2 O2 1.397(2) . ?
C3 C4 1.389(3) . ?
C3 H3 0.9500 . ?
C4 C5 1.391(2) . ?
C4 H4 0.9500 . ?
C5 C6 1.385(2) . ?
C5 H5 0.9500 . ?
C6 O1 1.3937(19) . ?
C7 C8 1.528(2) . ?
C7 C9 1.529(2) . ?
C7 P1 1.8275(17) . ?
C7 H7 1.0000 . ?
C8 H8A 0.9800 . ?
C8 H8B 0.9800 . ?
C8 H8C 0.9800 . ?
C9 H9A 0.9800 . ?
C9 H9B 0.9800 . ?
C9 H9C 0.9800 . ?
C10 C12 1.529(3) . ?
C10 C11 1.532(3) . ?
C10 P1 1.8385(18) . ?
C10 H10 1.0000 . ?
C11 H11A 0.9800 . ?
C11 H11B 0.9800 . ?
C11 H11C 0.9800 . ?
C12 H12A 0.9800 . ?
C12 H12B 0.9800 . ?
C12 H12C 0.9800 . ?
C13 C14 1.531(3) . ?
C13 C15 1.535(3) . ?
C13 P2 1.8397(18) . ?
C13 H13 1.0000 . ?
C14 H14A 0.9800 . ?
C14 H14B 0.9800 . ?
C14 H14C 0.9800 . ?
C15 H15A 0.9800 . ?
C15 H15B 0.9800 . ?
C15 H15C 0.9800 . ?
C16 C18 1.526(2) . ?
C16 C17 1.530(2) . ?
C16 P2 1.8323(17) . ?
C16 H16 1.0000 . ?
C17 H17A 0.9800 . ?
C17 H17B 0.9800 . ?
C17 H17C 0.9800 . ?
C18 H18A 0.9800 . ?
C18 H18B 0.9800 . ?
C18 H18C 0.9800 . ?
C19 O3 1.145(2) . ?
C19 Ir1 1.8945(18) . ?
O1 P1 1.6540(12) . ?
O2 P2 1.6450(13) . ?
P1 Ir1 2.2894(4) . ?
P2 Ir1 2.2815(4) . ?
Ir1 H1 1.59(2) . ?
Ir1 H2 1.58(2) . ?
 
loop_
 _geom_angle_atom_site_label_1
 _geom_angle_atom_site_label_2
 _geom_angle_atom_site_label_3
 _geom_angle
 _geom_angle_site_symmetry_1
 _geom_angle_site_symmetry_3
 _geom_angle_publ_flag
C2 C1 C6 116.32(15) . . ?
C2 C1 Ir1 121.78(12) . . ?
C6 C1 Ir1 121.89(12) . . ?
C1 C2 C3 123.38(16) . . ?
C1 C2 O2 117.53(14) . . ?
C3 C2 O2 119.09(15) . . ?
C2 C3 C4 117.81(16) . . ?
C2 C3 H3 121.1 . . ?
C4 C3 H3 121.1 . . ?
C3 C4 C5 121.37(16) . . ?
C3 C4 H4 119.3 . . ?
C5 C4 H4 119.3 . . ?
C6 C5 C4 118.11(16) . . ?
C6 C5 H5 120.9 . . ?
C4 C5 H5 120.9 . . ?
C5 C6 C1 122.99(15) . . ?
C5 C6 O1 119.57(15) . . ?
C1 C6 O1 117.44(14) . . ?
C8 C7 C9 111.12(15) . . ?
C8 C7 P1 110.88(11) . . ?
C9 C7 P1 111.25(12) . . ?
C8 C7 H7 107.8 . . ?
C9 C7 H7 107.8 . . ?
P1 C7 H7 107.8 . . ?
C7 C8 H8A 109.5 . . ?
C7 C8 H8B 109.5 . . ?
H8A C8 H8B 109.5 . . ?
C7 C8 H8C 109.5 . . ?
H8A C8 H8C 109.5 . . ?
H8B C8 H8C 109.5 . . ?
C7 C9 H9A 109.5 . . ?
C7 C9 H9B 109.5 . . ?
H9A C9 H9B 109.5 . . ?
C7 C9 H9C 109.5 . . ?
H9A C9 H9C 109.5 . . ?
H9B C9 H9C 109.5 . . ?
C12 C10 C11 109.55(16) . . ?
C12 C10 P1 112.10(13) . . ?
C11 C10 P1 110.26(12) . . ?
C12 C10 H10 108.3 . . ?
C11 C10 H10 108.3 . . ?
P1 C10 H10 108.3 . . ?
C10 C11 H11A 109.5 . . ?
C10 C11 H11B 109.5 . . ?
H11A C11 H11B 109.5 . . ?
C10 C11 H11C 109.5 . . ?
H11A C11 H11C 109.5 . . ?
H11B C11 H11C 109.5 . . ?
C10 C12 H12A 109.5 . . ?
C10 C12 H12B 109.5 . . ?
H12A C12 H12B 109.5 . . ?
C10 C12 H12C 109.5 . . ?
H12A C12 H12C 109.5 . . ?
H12B C12 H12C 109.5 . . ?
C14 C13 C15 109.80(16) . . ?
C14 C13 P2 110.25(13) . . ?
C15 C13 P2 110.90(12) . . ?
C14 C13 H13 108.6 . . ?
C15 C13 H13 108.6 . . ?
P2 C13 H13 108.6 . . ?
C13 C14 H14A 109.5 . . ?
C13 C14 H14B 109.5 . . ?
H14A C14 H14B 109.5 . . ?
C13 C14 H14C 109.5 . . ?
H14A C14 H14C 109.5 . . ?
H14B C14 H14C 109.5 . . ?
C13 C15 H15A 109.5 . . ?
C13 C15 H15B 109.5 . . ?
H15A C15 H15B 109.5 . . ?
C13 C15 H15C 109.5 . . ?
H15A C15 H15C 109.5 . . ?
H15B C15 H15C 109.5 . . ?
C18 C16 C17 111.34(14) . . ?
C18 C16 P2 111.85(12) . . ?
C17 C16 P2 113.42(12) . . ?
C18 C16 H16 106.6 . . ?
C17 C16 H16 106.6 . . ?
P2 C16 H16 106.6 . . ?
C16 C17 H17A 109.5 . . ?
C16 C17 H17B 109.5 . . ?
H17A C17 H17B 109.5 . . ?
C16 C17 H17C 109.5 . . ?
H17A C17 H17C 109.5 . . ?
H17B C17 H17C 109.5 . . ?
C16 C18 H18A 109.5 . . ?
C16 C18 H18B 109.5 . . ?
H18A C18 H18B 109.5 . . ?
C16 C18 H18C 109.5 . . ?
H18A C18 H18C 109.5 . . ?
H18B C18 H18C 109.5 . . ?
O3 C19 Ir1 178.68(16) . . ?
C6 O1 P1 115.09(10) . . ?
C2 O2 P2 115.28(10) . . ?
O1 P1 C7 99.82(7) . . ?
O1 P1 C10 101.43(7) . . ?
C7 P1 C10 105.42(8) . . ?
O1 P1 Ir1 105.57(4) . . ?
C7 P1 Ir1 121.66(6) . . ?
C10 P1 Ir1 119.20(6) . . ?
O2 P2 C16 100.01(7) . . ?
O2 P2 C13 102.46(8) . . ?
C16 P2 C13 107.02(8) . . ?
O2 P2 Ir1 105.98(5) . . ?
C16 P2 Ir1 119.51(6) . . ?
C13 P2 Ir1 118.72(6) . . ?
C19 Ir1 C1 178.80(7) . . ?
C19 Ir1 P2 100.81(5) . . ?
C1 Ir1 P2 78.66(5) . . ?
C19 Ir1 P1 102.03(5) . . ?
C1 Ir1 P1 78.52(5) . . ?
P2 Ir1 P1 157.135(16) . . ?
C19 Ir1 H1 90.5(8) . . ?
C1 Ir1 H1 88.4(8) . . ?
P2 Ir1 H1 91.3(8) . . ?
P1 Ir1 H1 89.4(8) . . ?
C19 Ir1 H2 94.5(8) . . ?
C1 Ir1 H2 86.5(8) . . ?
P2 Ir1 H2 87.3(8) . . ?
P1 Ir1 H2 89.9(8) . . ?
H1 Ir1 H2 174.9(10) . . ?
 
_refine_diff_density_max    0.558
_refine_diff_density_min   -0.560
_refine_diff_density_rms    0.079

_shelx_res_file
;

    jmg_b_135_0m.res created by SHELXL-2014/7

TITL JMG_B_135_0m in P-1 colorl. piece J Goldberg
CELL  0.71073   7.8388   9.9117  15.1225  105.935   92.176  107.411
ZERR     2.00   0.0005   0.0007   0.0010    0.003    0.003    0.003
LATT   1
SFAC  C    H    O    P    IR
UNIT  38   66   6    4    2
MERG   2
FMAP   2
PLAN   20
SIZE     0.10   0.15   0.18
ACTA    50.00
BOND   $H
WPDB  -2
L.S.   8
TEMP  -173.00
WGHT    0.011200    0.478900
FVAR       0.12823
C1    1    0.837024    0.041896    0.232729    11.00000    0.01018    0.00825 =
         0.01316    0.00219    0.00146    0.00092
C2    1    0.725446   -0.010970    0.149045    11.00000    0.01414    0.01377 =
         0.01335    0.00419    0.00189    0.00351
C3    1    0.581827   -0.142284    0.123890    11.00000    0.01382    0.01599 =
         0.01656    0.00019   -0.00187   -0.00029
AFIX  43
H3    2    0.507368   -0.174721    0.066099    11.00000   -1.20000
AFIX   0
C4    1    0.550496   -0.224756    0.185984    11.00000    0.01332    0.01270 =
         0.02353    0.00225    0.00108   -0.00188
AFIX  43
H4    2    0.453428   -0.315413    0.170083    11.00000   -1.20000
AFIX   0
C5    1    0.658262   -0.177383    0.270943    11.00000    0.01602    0.01191 =
         0.02021    0.00705    0.00396    0.00201
AFIX  43
H5    2    0.636573   -0.234645    0.312928    11.00000   -1.20000
AFIX   0
C6    1    0.798112   -0.044347    0.292614    11.00000    0.01110    0.01138 =
         0.01325    0.00200    0.00020    0.00305
C7    1    1.091234    0.258601    0.508291    11.00000    0.02038    0.01529 =
         0.00961    0.00465    0.00014    0.00552
AFIX  13
H7    2    1.099159    0.195904    0.549030    11.00000   -1.20000
AFIX   0
C8    1    0.916399    0.296047    0.520178    11.00000    0.02353    0.02095 =
         0.01448    0.00462    0.00310    0.00878
AFIX 137
H8A   2    0.920157    0.353417    0.584740    11.00000   -1.50000
H8B   2    0.813814    0.204183    0.504240    11.00000   -1.50000
H8C   2    0.903094    0.354559    0.479177    11.00000   -1.50000
AFIX   0
C9    1    1.255809    0.398827    0.539242    11.00000    0.02433    0.02056 =
         0.01745   -0.00004   -0.00255    0.00019
AFIX 137
H9A   2    1.260062    0.455988    0.495316    11.00000   -1.50000
H9B   2    1.365690    0.371269    0.541071    11.00000   -1.50000
H9C   2    1.247133    0.459077    0.601172    11.00000   -1.50000
AFIX   0
C10   1    1.268653    0.067502    0.393044    11.00000    0.01702    0.02000 =
         0.01758    0.00671    0.00017    0.00803
AFIX  13
H10   2    1.277975    0.048944    0.454512    11.00000   -1.20000
AFIX   0
C11   1    1.221019   -0.081348    0.316857    11.00000    0.02688    0.02441 =
         0.02121    0.00425    0.00355    0.01455
AFIX 137
H11A  2    1.218278   -0.064743    0.255928    11.00000   -1.50000
H11B  2    1.102352   -0.145662    0.322548    11.00000   -1.50000
H11C  2    1.311962   -0.128838    0.323367    11.00000   -1.50000
AFIX   0
C12   1    1.452017    0.169237    0.383025    11.00000    0.01542    0.03437 =
         0.05185    0.00934    0.00317    0.00784
AFIX 137
H12A  2    1.542077    0.118579    0.382333    11.00000   -1.50000
H12B  2    1.488037    0.260356    0.435402    11.00000   -1.50000
H12C  2    1.443440    0.193968    0.324918    11.00000   -1.50000
AFIX   0
C13   1    0.794521    0.365174    0.127848    11.00000    0.02250    0.02518 =
         0.01430    0.00829    0.00266    0.01281
AFIX  13
H13   2    0.768990    0.365047    0.062526    11.00000   -1.20000
AFIX   0
C14   1    0.614938    0.315957    0.165377    11.00000    0.02471    0.04306 =
         0.02804    0.01361    0.00844    0.01816
AFIX 137
H14A  2    0.637610    0.307945    0.227611    11.00000   -1.50000
H14B  2    0.539576    0.219363    0.124122    11.00000   -1.50000
H14C  2    0.552664    0.389055    0.168423    11.00000   -1.50000
AFIX   0
C15   1    0.905340    0.523258    0.186284    11.00000    0.03666    0.02065 =
         0.01959    0.00655    0.00573    0.01588
AFIX 137
H15A  2    0.839927    0.591604    0.181313    11.00000   -1.50000
H15B  2    1.022088    0.552744    0.163531    11.00000   -1.50000
H15C  2    0.924738    0.526324    0.251307    11.00000   -1.50000
AFIX   0
C16   1    1.050839    0.231760    0.030033    11.00000    0.01891    0.01522 =
         0.01206    0.00441    0.00344    0.00657
AFIX  13
H16   2    1.112744    0.156452    0.028234    11.00000   -1.20000
AFIX   0
C17   1    0.934126    0.181673   -0.063800    11.00000    0.02589    0.01987 =
         0.01197    0.00321    0.00150    0.00570
AFIX 137
H17A  2    0.879085    0.257037   -0.067383    11.00000   -1.50000
H17B  2    0.839193    0.087646   -0.070425    11.00000   -1.50000
H17C  2    1.009326    0.168247   -0.113708    11.00000   -1.50000
AFIX   0
C18   1    1.199032    0.379370    0.044129    11.00000    0.01956    0.02152 =
         0.01857    0.00668    0.00511    0.00372
AFIX 137
H18A  2    1.279429    0.367909   -0.003461    11.00000   -1.50000
H18B  2    1.268294    0.410528    0.105696    11.00000   -1.50000
H18C  2    1.144549    0.454475    0.039203    11.00000   -1.50000
AFIX   0
C19   1    1.240455    0.419736    0.297680    11.00000    0.01916    0.01737 =
         0.01178    0.00701    0.00079    0.00563
O1    3    0.906739    0.007586    0.377877    11.00000    0.01343    0.01142 =
         0.01415    0.00637   -0.00066   -0.00005
O2    3    0.762155    0.073067    0.087286    11.00000    0.01849    0.01610 =
         0.01263    0.00534   -0.00376   -0.00213
O3    3    1.354077    0.530931    0.315728    11.00000    0.02214    0.01717 =
         0.02619    0.00731   -0.00264   -0.00651
P1    4    1.089500    0.151001    0.388674    11.00000    0.01175    0.00982 =
         0.01093    0.00415   -0.00046    0.00147
P2    4    0.920097    0.235360    0.128058    11.00000    0.01382    0.01240 =
         0.00968    0.00408   -0.00021    0.00217
IR1   5    1.049075    0.237636    0.266493    11.00000    0.01035    0.00855 =
         0.00879    0.00322   -0.00057    0.00032
H1    2    0.920788    0.318776    0.321352    11.00000    0.03501
H2    2    1.162028    0.143810    0.208992    11.00000    0.03530
HKLF    4  1.0  1.00  0.00  0.00  0.00  1.00  0.00  0.00  0.00  1.00

REM  JMG_B_135_0m in P-1 colorl. piece J Goldberg
REM R1 =  0.0132 for    5144 Fo > 4sig(Fo)  and  0.0143 for all    5353 data
REM    242 parameters refined using      0 restraints

END

WGHT      0.0112      0.4786

REM Highest difference peak  0.558,  deepest hole -0.560,  1-sigma level  0.079
Q1    1   0.8483  0.3029  0.1123  11.00000  0.05    0.56
Q2    1   1.0680  0.1514  0.2625  11.00000  0.05    0.54
Q3    1   1.0205  0.3400  0.2741  11.00000  0.05    0.47
Q4    1   0.9855  0.2396  0.0688  11.00000  0.05    0.45
Q5    1   1.0601  0.1846  0.3300  11.00000  0.05    0.45
Q6    1   1.1880  0.0991  0.3809  11.00000  0.05    0.43
Q7    1   1.0938  0.2047  0.4486  11.00000  0.05    0.42
Q8    1   0.9391  0.1197  0.2615  11.00000  0.05    0.41
Q9    1   1.1428  0.3393  0.2626  11.00000  0.05    0.40
Q10   1   1.0009  0.2146 -0.0145  11.00000  0.05    0.40
Q11   1   0.7224 -0.1146  0.2792  11.00000  0.05    0.39
Q12   1   0.6799 -0.0846  0.1347  11.00000  0.05    0.38
Q13   1   0.6207 -0.2043  0.2243  11.00000  0.05    0.37
Q14   1   0.6410 -0.0571  0.1340  11.00000  0.05    0.36
Q15   1   0.7810 -0.0016  0.2727  11.00000  0.05    0.36
Q16   1   1.3350  0.1224  0.3733  11.00000  0.05    0.35
Q17   1   0.7398  0.0193  0.1963  11.00000  0.05    0.35
Q18   1   1.1599  0.3229  0.5410  11.00000  0.05    0.35
Q19   1   0.5842 -0.1826  0.1551  11.00000  0.05    0.33
Q20   1   0.9617  0.2777  0.2080  11.00000  0.05    0.33
;
_shelx_res_checksum    9629

_shelx_hkl_file
;
  -1   0   0  738.36   15.38
  -1   0   0  730.28   15.38
  -1   0   0  751.41   15.42
  -1   0   0  738.56   15.39
  -1   0   0  742.79   14.47
  -1   0   0  742.44   15.19
  -1   0   0  743.63   13.90
  -1   0   0  767.98   14.05
  -1   0   0  741.98   16.10
  -1   0   0  796.79   15.62
  -1   0   0  738.36   15.89
  -1   0   0  753.71   13.96
  -1   0   0  742.69   13.97
   1   0   0  756.27   13.96
   1   0   0  755.04   13.98
   1   0   0  775.31   15.64
   1   0   0  745.58   14.31
   1   0   0  734.58   14.48
   1   0   0  733.87   15.17
   1   0   0  741.35   13.90
   1   0   0  746.66   14.04
   1   0   0  740.51   16.10
   1   0   0  789.41   15.87
   1   0   0  730.20   15.62
   1   0   0  654.99   15.38
   1   0   0  763.31   15.39
  -2   0   0  151.36    3.67
  -2   0   0  154.51    3.46
  -2   0   0  151.36    3.57
  -2   0   0  156.05    3.72
  -2   0   0  147.47    3.69
  -2   0   0  152.14    3.86
  -2   0   0  152.82    3.72
  -2   0   0  152.65    3.33
  -2   0   0  159.53    3.71
  -2   0   0  156.44    3.35
  -2   0   0  149.15    3.31
  -2   0   0  153.70    3.31
  -2   0   0  155.47    3.26
   2   0   0  156.27    3.24
   2   0   0  151.28    3.87
   2   0   0  155.70    3.35
   2   0   0  158.11    3.31
   2   0   0  148.33    3.68
   2   0   0  154.93    3.54
   2   0   0  153.69    3.30
   2   0   0  157.08    3.36
   2   0   0  156.39    3.51
   2   0   0  159.93    3.73
   2   0   0  149.58    3.69
   2   0   0  154.46    3.74
   2   0   0  155.35    3.71
   2   0   0  149.50    3.64
  -3   0   0   52.84    1.64
  -3   0   0   52.60    1.93
  -3   0   0   53.15    1.83
  -3   0   0   54.44    1.71
  -3   0   0   55.95    1.74
  -3   0   0   53.45    1.72
  -3   0   0   55.71    1.65
  -3   0   0   54.47    1.60
  -3   0   0   56.35    1.86
  -3   0   0   58.09    1.91
  -3   0   0   53.29    1.84
  -3   0   0   52.07    1.81
   3   0   0   53.82    1.53
   3   0   0   54.60    1.94
   3   0   0   52.88    1.64
   3   0   0   54.37    1.62
   3   0   0   56.22    1.88
   3   0   0   49.77    1.80
   3   0   0   52.68    1.77
   3   0   0   56.43    1.63
   3   0   0   53.33    1.77
   3   0   0   53.92    1.66
   3   0   0   53.53    1.84
   3   0   0   53.10    1.84
   3   0   0   54.19    1.82
  -4   0   0    8.37    0.67
  -4   0   0    9.74    0.81
  -4   0   0    8.10    0.70
  -4   0   0    9.27    0.72
  -4   0   0    9.73    0.84
  -4   0   0    9.19    0.79
  -4   0   0    9.45    0.75
  -4   0   0    9.18    0.85
  -4   0   0    9.47    0.71
   4   0   0   10.60    0.89
   4   0   0    9.87    0.70
   4   0   0   10.91    0.85
   4   0   0   10.63    0.74
   4   0   0    8.48    0.78
   4   0   0    9.21    0.85
   4   0   0    9.18    0.82
   4   0   0    9.83    0.97
   4   0   0    9.15    0.90
   4   0   0   10.36    0.68
   4   0   0    6.75    0.77
   4   0   0    8.63    0.62
  -5   0   0    8.64    0.98
  -5   0   0    8.92    1.02
  -5   0   0    7.42    0.87
  -5   0   0    9.34    0.98
  -5   0   0   11.78    1.19
  -5   0   0    8.56    0.87
  -5   0   0    7.97    0.80
   5   0   0    9.42    0.77
   5   0   0   11.32    1.18
   5   0   0   10.55    1.10
   5   0   0    6.65    0.88
   5   0   0    9.22    1.03
   5   0   0    9.20    0.96
   5   0   0   10.23    1.06
   5   0   0    9.03    0.96
   5   0   0    9.82    1.15
   5   0   0    9.86    0.73
   5   0   0    9.70    0.89
  -6   0   0   87.53    2.90
  -6   0   0   90.52    2.59
  -6   0   0   92.85    3.62
  -6   0   0   93.54    3.42
  -6   0   0   92.99    3.09
  -6   0   0   89.18    3.18
   6   0   0   96.22    3.43
   6   0   0   90.85    3.43
   6   0   0   95.06    2.94
   6   0   0   96.36    3.12
   6   0   0   94.49    2.95
   6   0   0   96.98    2.63
   6   0   0   91.66    2.71
   6   0   0   92.37    3.59
   6   0   0   85.79    3.37
  -7   0   0  103.92    3.89
  -7   0   0   97.60    3.44
   7   0   0   96.30    3.98
   7   0   0   98.45    3.81
   7   0   0   93.19    3.15
   7   0   0  102.74    3.93
   7   0   0   95.27    3.19
   7   0   0   94.64    3.40
  -8   0   0   68.21    2.99
   8   0   0   66.23    3.44
   8   0   0   64.74    3.21
   8   0   0   66.32    2.67
   8   0   0   68.52    2.95
  -9   0   0   38.11    2.44
   9   0   0   38.65    2.41
   9   0   0   38.40    2.51
  10  -1   0    1.71    0.95
 -10   1   0    0.25    0.82
   9  -1   0    5.63    1.38
   9  -1   0    6.66    1.22
   9  -1   0    8.33    1.33
  -9   1   0    8.14    1.36
   8  -1   0   17.19    1.65
   8  -1   0   17.53    2.02
   8  -1   0   15.77    1.25
   8  -1   0   19.75    2.04
  -8   1   0   15.19    1.64
  -8   1   0   16.16    1.66
   7  -1   0   71.14    3.15
   7  -1   0   72.64    2.64
   7  -1   0   72.12    3.10
   7  -1   0   70.46    2.21
   7  -1   0   71.10    3.23
   7  -1   0   75.49    2.55
   7  -1   0   71.66    2.32
   7  -1   0   75.47    2.83
  -7   1   0   72.27    2.68
  -7   1   0   66.73    3.00
  -7   1   0   71.80    2.81
   6  -1   0   46.78    1.69
   6  -1   0   50.55    2.43
   6  -1   0   49.66    2.33
   6  -1   0   47.55    2.25
   6  -1   0   52.89    2.40
   6  -1   0   48.76    1.83
   6  -1   0   50.46    1.86
   6  -1   0   46.85    2.24
   6  -1   0   48.12    1.94
   6  -1   0   48.29    2.11
   6  -1   0   48.46    2.06
  -6   1   0   46.82    2.10
  -6   1   0   48.79    2.24
  -6   1   0   50.30    2.47
  -6   1   0   48.69    2.07
  -6   1   0   47.55    2.31
  -6   1   0   50.14    1.98
  -6   1   0   48.02    1.51
  -6   1   0   51.74    2.32
   5  -1   0  143.77    3.80
   5  -1   0  143.17    4.27
   5  -1   0  149.68    4.50
   5  -1   0  146.64    3.68
   5  -1   0  140.11    3.69
   5  -1   0  148.51    4.29
   5  -1   0  140.60    3.60
   5  -1   0  142.16    3.82
   5  -1   0  151.60    4.29
   5  -1   0  136.72    4.53
   5  -1   0  139.59    3.93
   5  -1   0  149.97    4.34
  -5   1   0  148.03    4.30
  -5   1   0  145.77    4.51
  -5   1   0  144.57    4.04
  -5   1   0  144.07    4.22
  -5   1   0  137.44    4.19
  -5   1   0  142.54    3.82
  -5   1   0  138.77    3.67
  -5   1   0  146.87    3.33
  -5   1   0  143.52    3.99
   4  -1   0  184.04    4.86
   4  -1   0  194.81    4.94
   4  -1   0  192.14    5.14
   4  -1   0  182.29    4.47
   4  -1   0  181.05    4.51
   4  -1   0  187.35    4.18
   4  -1   0  190.06    4.41
   4  -1   0  173.52    4.18
   4  -1   0  181.50    4.89
   4  -1   0  180.71    4.85
   4  -1   0  184.03    4.30
   4  -1   0  187.77    4.87
  -4   1   0  183.39    4.36
  -4   1   0  187.08    4.85
  -4   1   0  172.17    3.98
  -4   1   0  189.46    4.89
  -4   1   0  188.10    4.68
  -4   1   0  188.94    4.58
  -4   1   0  191.59    5.15
  -4   1   0  183.42    4.86
  -4   1   0  190.54    4.34
  -4   1   0  185.38    4.28
  -4   1   0  190.98    4.88
   3  -1   0  130.65    3.13
   3  -1   0  134.61    3.16
   3  -1   0  132.70    3.48
   3  -1   0  136.26    3.28
   3  -1   0  129.94    3.48
   3  -1   0  132.00    3.43
   3  -1   0  131.80    2.99
   3  -1   0  130.59    3.16
   3  -1   0  132.98    3.28
   3  -1   0  134.59    3.09
   3  -1   0  134.15    3.67
   3  -1   0  131.23    3.48
   3  -1   0  134.09    3.51
   3  -1   0  131.36    3.00
  -3   1   0  130.09    3.27
  -3   1   0  138.14    3.50
  -3   1   0  128.01    3.47
  -3   1   0  131.75    3.67
  -3   1   0  132.17    2.84
  -3   1   0  131.41    3.32
  -3   1   0  130.53    3.48
  -3   1   0  129.52    3.06
  -3   1   0  129.29    3.12
  -3   1   0  131.71    3.00
  -3   1   0  130.97    3.46
  -3   1   0  131.97    3.07
   2  -1   0   70.15    1.86
   2  -1   0   73.24    1.87
   2  -1   0   70.26    1.66
   2  -1   0   74.91    2.02
   2  -1   0   71.63    1.98
   2  -1   0   71.06    1.79
   2  -1   0   71.69    1.56
   2  -1   0   72.02    1.73
   2  -1   0   70.17    2.08
   2  -1   0   71.39    1.96
   2  -1   0   72.47    2.01
   2  -1   0   71.35    1.72
  -2   1   0   70.47    1.98
  -2   1   0   69.87    1.66
  -2   1   0   74.66    1.90
  -2   1   0   70.92    1.78
  -2   1   0   72.64    1.87
  -2   1   0   72.28    1.99
  -2   1   0   68.15    1.97
  -2   1   0   75.85    2.11
  -2   1   0   72.41    1.97
  -2   1   0   72.20    1.74
  -2   1   0   74.60    1.57
  -2   1   0   70.17    1.70
  -2   1   0   75.42    1.80
   1  -1   0  129.78    2.92
   1  -1   0  125.32    2.84
   1  -1   0  123.40    2.63
   1  -1   0  124.86    2.92
   1  -1   0  125.42    2.58
   1  -1   0  128.57    2.75
   1  -1   0  124.10    2.58
   1  -1   0  116.12    2.89
   1  -1   0  124.91    2.89
  -1   1   0  125.42    2.62
  -1   1   0  127.03    2.64
  -1   1   0  130.15    2.85
  -1   1   0  132.05    2.94
  -1   1   0  127.89    2.60
  -1   1   0  125.64    2.90
  -1   1   0  123.77    2.58
  -1   1   0  127.47    2.91
  -1   1   0  125.08    2.91
  -1   1   0  123.94    3.05
  -1   1   0  125.34    2.94
  -1   1   0  124.23    2.75
   0  -1   0   65.77    1.53
   0  -1   0   65.39    1.56
   0  -1   0   66.16    1.50
   0  -1   0   64.25    1.72
   0  -1   0   66.53    1.45
   0  -1   0   64.83    1.52
   0  -1   0   64.12    1.66
   0  -1   0   64.50    1.74
   0  -1   0   66.66    1.69
   0  -1   0   66.49    1.70
   0  -1   0   63.13    1.72
   0   1   0   65.18    1.51
   0   1   0   66.48    1.72
   0   1   0   64.64    1.72
   0   1   0   65.91    1.71
   0   1   0   66.76    1.52
   0   1   0   65.35    1.44
   0   1   0   64.61    1.74
  -1  -1   0   10.58    0.54
  -1  -1   0   10.87    0.59
  -1  -1   0   10.99    0.50
  -1  -1   0   10.22    0.54
  -1  -1   0   11.74    0.54
  -1  -1   0   10.63    0.59
  -1  -1   0   10.61    0.62
  -1  -1   0   10.56    0.53
  -1  -1   0   10.21    0.55
  -1  -1   0   10.68    0.51
   1   1   0   11.08    0.49
   1   1   0   11.06    0.59
   1   1   0    8.98    0.56
   1   1   0   10.36    0.61
   1   1   0    9.74    0.51
   1   1   0   10.83    0.54
   1   1   0   10.16    0.56
   1   1   0   10.70    0.51
   1   1   0   10.86    0.55
   1   1   0   10.91    0.49
  -2  -1   0   41.72    1.42
  -2  -1   0   40.49    1.26
  -2  -1   0   39.23    1.44
  -2  -1   0   42.70    1.47
  -2  -1   0   42.24    1.43
  -2  -1   0   41.44    1.52
  -2  -1   0   42.00    1.35
  -2  -1   0   40.95    1.42
  -2  -1   0   39.46    1.29
   2   1   0   40.19    1.44
   2   1   0   41.47    1.18
   2   1   0   39.61    1.42
   2   1   0   42.55    1.29
   2   1   0   40.65    1.38
   2   1   0   38.86    1.25
   2   1   0   39.83    1.25
   2   1   0   41.34    1.46
   2   1   0   38.58    1.22
   2   1   0   39.80    1.30
   2   1   0   42.65    1.54
   2   1   0   39.05    1.38
  -3  -1   0  188.72    4.85
  -3  -1   0  199.77    4.98
  -3  -1   0  196.73    4.94
  -3  -1   0  187.66    4.38
  -3  -1   0  193.64    4.72
  -3  -1   0  195.04    5.16
  -3  -1   0  195.59    4.89
  -3  -1   0  198.26    4.73
  -3  -1   0  193.40    4.42
   3   1   0  191.74    4.90
   3   1   0  193.74    5.16
   3   1   0  193.81    4.21
   3   1   0  194.89    4.91
   3   1   0  191.37    4.36
   3   1   0  182.78    4.92
   3   1   0  191.75    4.54
   3   1   0  197.97    4.53
   3   1   0  180.64    4.86
   3   1   0  196.83    4.95
   3   1   0  195.52    4.47
   3   1   0  194.12    4.37
  -4  -1   0  123.90    3.73
  -4  -1   0  125.84    3.94
  -4  -1   0  123.91    3.75
  -4  -1   0  129.38    3.58
  -4  -1   0  117.00    3.63
  -4  -1   0  124.07    3.34
  -4  -1   0  126.03    3.32
   4   1   0  124.42    3.91
   4   1   0  122.75    3.36
   4   1   0  123.53    3.24
   4   1   0  119.97    3.34
   4   1   0  122.10    3.71
   4   1   0  122.98    3.06
   4   1   0  127.40    3.74
   4   1   0  123.92    3.73
   4   1   0  119.87    3.20
   4   1   0  126.97    3.79
   4   1   0  125.69    3.27
   4   1   0  120.39    3.66
  -5  -1   0  221.11    5.90
  -5  -1   0  208.71    6.11
  -5  -1   0  213.13    5.89
  -5  -1   0  208.01    5.77
  -5  -1   0  208.07    5.56
  -5  -1   0  206.19    5.46
  -5  -1   0  207.49    5.22
   5   1   0  203.79    5.06
   5   1   0  205.17    5.79
   5   1   0  212.08    5.27
   5   1   0  214.66    5.86
   5   1   0  213.29    6.12
   5   1   0  201.74    5.02
   5   1   0  203.37    5.21
   5   1   0  207.23    5.77
   5   1   0  210.05    5.82
  -6  -1   0  116.89    3.92
  -6  -1   0  115.34    4.09
  -6  -1   0  118.42    3.72
   6   1   0  120.62    3.10
   6   1   0  126.26    4.26
   6   1   0  118.67    3.20
   6   1   0  123.25    4.18
   6   1   0  120.90    3.77
   6   1   0  125.03    3.69
   6   1   0  120.95    4.38
   6   1   0  115.78    3.51
   6   1   0  121.09    4.20
  -7  -1   0   74.43    3.01
  -7  -1   0   73.88    3.33
   7   1   0   78.78    3.58
   7   1   0   76.16    2.90
   7   1   0   79.07    3.45
   7   1   0   76.56    2.79
   7   1   0   76.74    3.06
   7   1   0   77.28    3.38
  -8  -1   0   40.78    2.35
   8   1   0   45.23    2.72
   8   1   0   42.66    2.24
   8   1   0   43.44    2.43
  -9  -1   0   10.40    1.58
   9   1   0   10.75    1.68
   9   1   0   13.78    1.68
  10  -2   0   33.56    2.40
 -10   2   0   39.87    2.59
   9  -2   0   43.49    2.45
   9  -2   0   44.60    2.98
  -9   2   0   41.93    2.45
   8  -2   0   75.72    2.73
   8  -2   0   83.42    3.03
   8  -2   0   80.37    3.56
   8  -2   0   80.91    3.19
   8  -2   0   81.89    3.76
   8  -2   0   85.33    3.12
  -8   2   0   82.02    3.23
  -8   2   0   83.99    3.62
  -8   2   0   82.14    3.10
   7  -2   0   70.79    2.64
   7  -2   0   74.84    3.19
   7  -2   0   74.31    2.35
   7  -2   0   77.20    2.85
   7  -2   0   68.23    2.38
   7  -2   0   67.66    2.40
   7  -2   0   76.96    3.33
   7  -2   0   79.24    3.18
   7  -2   0   69.04    2.75
  -7   2   0   74.61    2.71
  -7   2   0   75.98    2.86
  -7   2   0   74.74    3.15
   6  -2   0   35.50    1.92
   6  -2   0   36.41    1.90
   6  -2   0   34.76    1.70
   6  -2   0   35.09    1.44
   6  -2   0   33.93    1.43
   6  -2   0   35.45    1.92
   6  -2   0   37.27    2.05
   6  -2   0   37.58    1.72
   6  -2   0   37.74    1.98
   6  -2   0   37.95    1.67
   6  -2   0   33.69    1.54
  -6   2   0   35.33    1.90
  -6   2   0   36.57    1.86
  -6   2   0   33.23    1.60
  -6   2   0   35.44    1.73
  -6   2   0   32.40    1.68
  -6   2   0   34.57    1.89
   5  -2   0   12.46    1.03
   5  -2   0    8.25    0.92
   5  -2   0   13.37    1.09
   5  -2   0   10.73    0.82
   5  -2   0   13.00    0.89
   5  -2   0   11.36    0.76
   5  -2   0   12.68    0.76
   5  -2   0   14.48    0.91
   5  -2   0   12.59    0.93
   5  -2   0   12.28    1.04
   5  -2   0    8.05    0.99
   5  -2   0   12.63    0.93
  -5   2   0   11.61    1.00
  -5   2   0   11.21    1.02
  -5   2   0   11.52    0.89
  -5   2   0   11.93    0.89
  -5   2   0   11.51    0.95
  -5   2   0   11.38    0.92
  -5   2   0   11.08    0.96
  -5   2   0   12.87    0.74
  -5   2   0   12.69    0.76
  -5   2   0   11.83    0.86
   4  -2   0    2.67    0.54
   4  -2   0    3.41    0.62
   4  -2   0    2.75    0.45
   4  -2   0    2.72    0.51
   4  -2   0    1.90    0.38
   4  -2   0    2.24    0.49
   4  -2   0    2.29    0.40
   4  -2   0    2.72    0.37
   4  -2   0    1.54    0.38
   4  -2   0    2.90    0.42
   4  -2   0    2.50    0.39
   4  -2   0    3.14    0.53
  -4   2   0    2.65    0.52
  -4   2   0    2.93    0.50
  -4   2   0    3.46    0.43
  -4   2   0    2.16    0.42
  -4   2   0    2.71    0.52
  -4   2   0    2.70    0.45
  -4   2   0    2.71    0.53
  -4   2   0    2.79    0.38
  -4   2   0    1.95    0.41
  -4   2   0    3.82    0.59
   3  -2   0    2.79    0.51
   3  -2   0    2.82    0.23
   3  -2   0    2.30    0.39
   3  -2   0    3.33    0.48
   3  -2   0    2.31    0.32
   3  -2   0    2.19    0.32
   3  -2   0    2.32    0.39
   3  -2   0    2.64    0.40
   3  -2   0    2.79    0.45
   3  -2   0    2.51    0.40
   3  -2   0    3.75    0.51
   3  -2   0    2.28    0.32
   3  -2   0    3.47    0.37
   3  -2   0    1.97    0.37
  -3   2   0    2.74    0.43
  -3   2   0    2.82    0.32
  -3   2   0    2.75    0.33
  -3   2   0    2.77    0.40
  -3   2   0    2.19    0.39
  -3   2   0    2.44    0.35
  -3   2   0    2.94    0.47
  -3   2   0    2.58    0.42
  -3   2   0    2.06    0.38
  -3   2   0    2.08    0.36
   2  -2   0  708.06   15.89
   2  -2   0  717.86   13.74
   2  -2   0  723.93   15.17
   2  -2   0  702.02   15.16
   2  -2   0  710.97   13.77
   2  -2   0  727.17   13.73
   2  -2   0  725.96   13.62
   2  -2   0  705.00   14.33
   2  -2   0  709.42   13.99
   2  -2   0  702.83   15.38
   2  -2   0  714.35   15.14
   2  -2   0  714.97   14.93
   2  -2   0  713.20   15.34
  -2   2   0  728.61   15.16
  -2   2   0  733.54   15.34
  -2   2   0  727.81   14.36
  -2   2   0  719.68   13.73
  -2   2   0  711.89   15.39
  -2   2   0  711.72   13.74
  -2   2   0  707.14   15.14
  -2   2   0  701.61   15.16
  -2   2   0  703.19   13.75
  -2   2   0  715.27   13.63
   1  -2   0  304.02    6.86
   1  -2   0  309.57    6.26
   1  -2   0  310.18    6.92
   1  -2   0  310.76    6.64
   1  -2   0  297.70    6.84
   1  -2   0  314.63    6.14
   1  -2   0  310.37    6.60
   1  -2   0  325.65    7.11
   1  -2   0  321.09    6.92
   1  -2   0  304.89    6.96
   1  -2   0  302.03    7.28
   1  -2   0  307.82    6.20
  -1   2   0  317.68    6.97
  -1   2   0  294.84    6.83
  -1   2   0  319.99    6.93
  -1   2   0  313.17    6.14
  -1   2   0  313.81    6.88
  -1   2   0  309.25    7.07
  -1   2   0  304.18    6.19
  -1   2   0  320.01    6.32
  -1   2   0  309.79    6.59
  -1   2   0  305.15    6.25
  -1   2   0  307.56    6.63
  -1   2   0  324.46    6.95
   0  -2   0  364.52    8.25
   0  -2   0  361.67    7.44
   0  -2   0  369.79    8.16
   0  -2   0  370.04    8.18
   0  -2   0  370.67    7.80
   0  -2   0  359.22    8.27
   0  -2   0  372.95    8.28
   0  -2   0  375.51    7.36
   0  -2   0  370.54    7.52
   0  -2   0  372.17    8.16
   0   2   0  374.19    8.27
   0   2   0  368.39    7.77
   0   2   0  358.80    8.25
   0   2   0  374.46    8.20
   0   2   0  367.78    7.21
   0   2   0  357.02    8.48
   0   2   0  371.05    7.47
   0   2   0  354.07    8.29
  -1  -2   0  363.82    8.15
  -1  -2   0  353.66    7.02
  -1  -2   0  348.77    7.40
  -1  -2   0  354.47    7.73
  -1  -2   0  354.23    7.99
  -1  -2   0  365.04    8.15
  -1  -2   0  369.61    8.53
  -1  -2   0  355.18    7.33
  -1  -2   0  362.22    8.03
  -1  -2   0  360.59    7.22
  -1  -2   0  357.39    7.24
   1   2   0  350.02    8.10
   1   2   0  355.23    8.47
   1   2   0  355.00    7.32
   1   2   0  363.14    8.12
   1   2   0  353.73    8.05
   1   2   0  351.23    7.39
   1   2   0  367.75    7.99
   1   2   0  354.76    8.06
   1   2   0  343.46    7.65
   1   2   0  361.59    7.20
   1   2   0  365.99    7.20
  -2  -2   0  464.28   10.07
  -2  -2   0  467.82    9.94
  -2  -2   0  449.57    9.33
  -2  -2   0  465.69    9.54
  -2  -2   0  444.92   10.38
  -2  -2   0  463.88   10.47
  -2  -2   0  458.68   10.31
  -2  -2   0  469.70    9.35
  -2  -2   0  469.50   10.32
   2   2   0  465.93   10.94
   2   2   0  472.71    9.47
   2   2   0  453.18   10.23
   2   2   0  458.04   10.42
   2   2   0  463.69    9.51
   2   2   0  463.34    9.11
   2   2   0  468.89   10.47
   2   2   0  466.23    9.30
   2   2   0  460.68    9.89
   2   2   0  457.79   10.35
   2   2   0  471.69   10.43
  -3  -2   0  283.44    7.35
  -3  -2   0  279.71    6.28
  -3  -2   0  285.04    6.95
  -3  -2   0  290.44    7.10
  -3  -2   0  294.15    7.06
  -3  -2   0  279.81    6.74
  -3  -2   0  283.81    6.28
   3   2   0  279.73    6.98
   3   2   0  286.12    7.02
   3   2   0  293.09    6.24
   3   2   0  273.77    7.09
   3   2   0  285.27    6.39
   3   2   0  286.40    7.39
   3   2   0  286.81    6.00
   3   2   0  283.38    6.36
   3   2   0  294.72    7.02
   3   2   0  281.18    6.45
   3   2   0  286.98    7.06
  -4  -2   0   22.44    1.24
  -4  -2   0   25.12    1.43
  -4  -2   0   23.18    1.44
  -4  -2   0   22.43    1.47
  -4  -2   0   25.28    1.49
  -4  -2   0   25.89    1.35
  -4  -2   0   23.97    1.28
   4   2   0   21.07    1.04
   4   2   0   25.10    1.43
   4   2   0   26.76    1.37
   4   2   0   21.72    1.41
   4   2   0   24.17    1.09
   4   2   0   22.34    1.41
   4   2   0   24.67    1.47
   4   2   0   28.10    1.30
   4   2   0   25.74    1.58
   4   2   0   24.83    1.34
  -5  -2   0    0.34    0.37
  -5  -2   0    0.82    0.42
  -5  -2   0    0.10    0.39
  -5  -2   0   -0.07    0.29
  -5  -2   0    0.19    0.37
  -5  -2   0    0.11    0.42
   5   2   0   -0.05    0.34
   5   2   0    0.51    0.34
   5   2   0    0.06    0.36
   5   2   0   -0.05    0.36
   5   2   0    0.49    0.41
   5   2   0    0.27    0.24
   5   2   0    0.61    0.43
   5   2   0   -0.07    0.31
   5   2   0    0.45    0.41
  -6  -2   0   17.79    1.83
  -6  -2   0   17.26    1.36
   6   2   0   16.63    1.47
   6   2   0   15.62    1.47
   6   2   0   19.52    1.61
   6   2   0   14.77    1.68
   6   2   0   14.46    1.41
   6   2   0   14.73    1.16
  -7  -2   0   33.09    2.19
  -7  -2   0   30.45    1.94
   7   2   0   32.15    2.18
   7   2   0   31.58    1.99
   7   2   0   31.80    1.91
   7   2   0   30.84    2.29
   7   2   0   32.08    2.30
  -8  -2   0   71.90    3.26
   8   2   0   65.00    3.00
   8   2   0   68.76    3.20
   8   2   0   69.12    3.50
  -9  -2   0   53.08    3.02
   9   2   0   55.66    3.40
  10  -3   0    0.44    0.72
 -10   3   0   -0.26    0.68
   9  -3   0   15.92    1.71
  -9   3   0   13.95    1.52
  -9   3   0   15.24    1.67
   8  -3   0   10.68    1.26
   8  -3   0   11.21    0.88
   8  -3   0    9.38    1.14
   8  -3   0   10.37    1.42
   8  -3   0    7.95    1.23
   8  -3   0    9.49    1.24
   8  -3   0    9.91    0.99
  -8   3   0   11.19    1.32
  -8   3   0    9.17    1.45
  -8   3   0   10.90    1.30
   7  -3   0   62.61    2.54
   7  -3   0   56.50    2.20
   7  -3   0   59.15    2.12
   7  -3   0   56.04    2.31
   7  -3   0   59.43    2.10
   7  -3   0   58.44    2.76
   7  -3   0   57.49    2.34
   7  -3   0   54.82    2.71
   7  -3   0   59.87    2.92
   7  -3   0   60.44    1.96
  -7   3   0   55.29    2.32
  -7   3   0   62.24    2.54
  -7   3   0   57.74    2.73
   6  -3   0   80.22    2.86
   6  -3   0   82.43    2.57
   6  -3   0   82.08    3.29
   6  -3   0   84.70    2.83
   6  -3   0   79.26    2.69
   6  -3   0   87.38    3.21
   6  -3   0   83.49    2.72
   6  -3   0   85.26    2.37
   6  -3   0   80.41    2.79
   6  -3   0   80.39    2.65
   6  -3   0   78.35    3.07
  -6   3   0   82.90    3.13
  -6   3   0   84.00    2.73
  -6   3   0   81.64    3.06
  -6   3   0   81.76    3.31
  -6   3   0   84.97    2.85
  -6   3   0   79.48    2.89
  -6   3   0   80.93    3.09
   5  -3   0   69.25    2.01
   5  -3   0   74.37    2.41
   5  -3   0   69.32    2.76
   5  -3   0   67.47    2.40
   5  -3   0   71.40    2.61
   5  -3   0   63.32    2.56
   5  -3   0   66.64    2.32
   5  -3   0   71.23    2.30
   5  -3   0   67.75    2.62
   5  -3   0   72.94    2.20
   5  -3   0   68.63    2.20
  -5   3   0   71.00    2.46
  -5   3   0   68.22    2.59
  -5   3   0   67.84    2.43
  -5   3   0   66.89    2.72
  -5   3   0   69.56    2.35
  -5   3   0   67.50    2.56
  -5   3   0   68.22    1.96
  -5   3   0   66.09    2.58
  -5   3   0   70.08    2.26
   4  -3   0   79.08    2.23
   4  -3   0   79.09    2.61
   4  -3   0   75.24    2.34
   4  -3   0   75.19    2.09
   4  -3   0   77.65    2.29
   4  -3   0   75.21    2.12
   4  -3   0   76.25    2.45
   4  -3   0   71.68    2.70
   4  -3   0   76.20    1.83
   4  -3   0   74.81    2.40
   4  -3   0   78.08    2.63
   4  -3   0   75.43    2.62
   4  -3   0   80.81    2.80
  -4   3   0   77.74    2.45
  -4   3   0   77.52    2.58
  -4   3   0   78.75    2.48
  -4   3   0   79.57    2.65
  -4   3   0   76.01    2.58
  -4   3   0   77.38    2.35
  -4   3   0   76.72    2.02
  -4   3   0   74.98    2.24
  -4   3   0   76.55    2.61
  -4   3   0   78.32    2.77
   3  -3   0  242.82    6.22
   3  -3   0  242.32    5.84
   3  -3   0  231.44    5.15
   3  -3   0  236.83    5.68
   3  -3   0  234.26    5.15
   3  -3   0  242.63    5.16
   3  -3   0  249.88    6.24
   3  -3   0  239.70    5.34
   3  -3   0  244.12    5.57
   3  -3   0  234.57    5.87
   3  -3   0  230.40    5.85
   3  -3   0  247.28    5.93
   3  -3   0  242.76    5.54
  -3   3   0  240.05    5.10
  -3   3   0  247.56    5.89
  -3   3   0  236.52    5.84
  -3   3   0  242.65    5.91
  -3   3   0  238.51    6.19
  -3   3   0  237.26    5.19
  -3   3   0  237.62    5.94
  -3   3   0  237.38    5.28
  -3   3   0  240.84    5.56
   2  -3   0  266.49    6.34
   2  -3   0  258.98    6.68
   2  -3   0  262.37    5.68
   2  -3   0  277.72    5.62
   2  -3   0  278.95    5.84
   2  -3   0  266.58    6.31
   2  -3   0  262.32    6.28
   2  -3   0  272.48    6.37
   2  -3   0  251.96    6.41
   2  -3   0  276.35    6.04
  -2   3   0  268.33    6.48
  -2   3   0  268.38    5.68
  -2   3   0  277.22    6.07
  -2   3   0  275.36    5.72
  -2   3   0  271.65    6.31
  -2   3   0  273.49    6.33
  -2   3   0  255.32    6.32
  -2   3   0  265.42    6.69
  -2   3   0  273.13    5.62
  -2   3   0  276.90    6.41
  -2   3   0  265.73    6.03
   1  -3   0   37.69    1.52
   1  -3   0   34.41    1.45
   1  -3   0   37.60    1.44
   1  -3   0   35.66    1.28
   1  -3   0   34.62    1.39
   1  -3   0   34.58    1.51
   1  -3   0   35.86    1.39
   1  -3   0   34.88    1.20
   1  -3   0   36.11    1.36
   1  -3   0   37.80    1.21
  -1   3   0   36.15    1.27
  -1   3   0   38.12    1.40
  -1   3   0   33.52    1.54
  -1   3   0   36.19    1.43
  -1   3   0   35.15    1.37
  -1   3   0   35.15    1.23
  -1   3   0   37.37    1.22
  -1   3   0   36.12    1.54
  -1   3   0   35.85    1.49
   0  -3   0   44.55    1.77
   0  -3   0   45.46    1.42
   0  -3   0   42.78    1.58
   0  -3   0   45.66    1.74
   0  -3   0   42.91    1.66
   0  -3   0   44.28    1.79
   0  -3   0   44.75    1.55
   0  -3   0   43.50    1.65
   0  -3   0   42.57    1.79
   0  -3   0   45.08    1.44
   0   3   0   42.75    1.74
   0   3   0   41.31    1.35
   0   3   0   43.70    1.51
   0   3   0   42.81    1.76
   0   3   0   44.08    1.81
   0   3   0   42.84    1.75
   0   3   0   45.52    1.66
   0   3   0   42.48    1.37
   0   3   0   41.26    1.47
  -1  -3   0    0.39    0.25
  -1  -3   0   -0.01    0.24
  -1  -3   0    0.37    0.22
  -1  -3   0    0.09    0.23
  -1  -3   0   -0.12    0.17
  -1  -3   0    0.17    0.23
  -1  -3   0    0.20    0.19
  -1  -3   0   -0.16    0.17
  -1  -3   0   -0.15    0.22
  -1  -3   0    0.04    0.23
   1   3   0   -0.03    0.20
   1   3   0    0.06    0.21
   1   3   0   -0.19    0.15
   1   3   0    0.04    0.23
   1   3   0   -0.22    0.15
   1   3   0   -0.06    0.15
   1   3   0    0.01    0.21
   1   3   0    0.19    0.23
   1   3   0   -0.10    0.19
   1   3   0    0.19    0.25
   1   3   0    0.00    0.23
  -2  -3   0    3.89    0.54
  -2  -3   0    3.73    0.59
  -2  -3   0    4.41    0.69
  -2  -3   0    4.65    0.74
  -2  -3   0    4.73    0.70
  -2  -3   0    3.99    0.58
  -2  -3   0    3.70    0.62
  -2  -3   0    4.08    0.23
  -2  -3   0    3.47    0.66
   2   3   0    4.27    0.60
   2   3   0    3.77    0.60
   2   3   0    3.99    0.55
   2   3   0    7.04    0.95
   2   3   0    3.27    0.57
   2   3   0    2.93    0.56
   2   3   0    5.58    0.75
   2   3   0    4.07    0.51
  -3  -3   0   40.65    1.84
  -3  -3   0   39.18    1.92
  -3  -3   0   41.66    2.04
  -3  -3   0   42.12    1.97
  -3  -3   0   38.41    1.90
  -3  -3   0   38.48    1.69
  -3  -3   0   38.66    1.64
   3   3   0   41.58    1.46
   3   3   0   38.10    1.42
   3   3   0   40.82    1.92
   3   3   0   40.85    1.74
   3   3   0   41.58    1.62
   3   3   0   40.15    1.83
   3   3   0   39.98    1.88
   3   3   0   40.79    2.01
   3   3   0   42.04    1.96
  -4  -3   0  112.86    3.90
  -4  -3   0  120.67    3.84
  -4  -3   0  115.99    3.91
  -4  -3   0  107.34    3.37
  -4  -3   0  113.07    4.08
  -4  -3   0  117.39    3.96
  -4  -3   0  116.87    3.64
   4   3   0  113.83    3.89
   4   3   0  122.38    3.87
   4   3   0  109.91    3.83
   4   3   0  118.84    3.32
   4   3   0  107.11    3.85
   4   3   0  117.17    4.14
   4   3   0  115.44    3.52
   4   3   0  111.35    3.05
   4   3   0  113.59    3.84
  -5  -3   0  131.49    3.99
  -5  -3   0  132.42    4.43
  -5  -3   0  134.54    4.26
   5   3   0  130.73    4.42
   5   3   0  126.91    4.10
   5   3   0  126.00    4.69
   5   3   0  135.79    3.81
   5   3   0  131.07    4.05
   5   3   0  132.73    4.49
   5   3   0  132.58    4.53
  -6  -3   0  128.48    4.19
  -6  -3   0  130.11    4.67
   6   3   0  130.00    4.26
   6   3   0  129.85    4.67
   6   3   0  128.42    4.70
   6   3   0  133.09    3.93
   6   3   0  130.56    4.30
   6   3   0  131.91    5.01
  -7  -3   0  115.97    4.16
   7   3   0  105.05    4.75
   7   3   0  123.06    4.69
   7   3   0  115.22    4.15
   7   3   0  116.48    4.17
  -8  -3   0   58.99    3.04
   8   3   0   55.76    2.92
   8   3   0   56.41    2.94
  10  -4   0   48.88    2.84
 -10   4   0   53.23    2.96
   9  -4   0   72.16    3.26
  -9   4   0   77.59    3.36
  -9   4   0   80.02    3.26
   8  -4   0   57.12    2.96
   8  -4   0   53.27    2.22
   8  -4   0   56.74    2.49
   8  -4   0   52.17    2.32
   8  -4   0   57.77    2.65
   8  -4   0   57.12    2.12
  -8   4   0   55.06    2.49
  -8   4   0   53.39    2.57
   7  -4   0   56.72    2.74
   7  -4   0   56.53    2.48
   7  -4   0   54.49    1.93
   7  -4   0   51.76    2.04
   7  -4   0   51.12    2.36
   7  -4   0   53.15    2.78
   7  -4   0   58.00    2.34
   7  -4   0   54.69    2.20
   7  -4   0   54.00    2.39
   7  -4   0   52.85    2.63
   7  -4   0   51.67    2.18
  -7   4   0   52.49    2.61
  -7   4   0   51.33    2.35
  -7   4   0   57.01    2.32
   6  -4   0   43.81    1.99
   6  -4   0   43.91    2.21
   6  -4   0   44.04    1.64
   6  -4   0   41.02    1.98
   6  -4   0   42.13    1.30
   6  -4   0   43.50    2.31
   6  -4   0   43.38    2.21
   6  -4   0   40.75    1.85
   6  -4   0   44.58    1.78
   6  -4   0   41.17    1.71
   6  -4   0   47.02    1.96
   6  -4   0   45.48    2.20
  -6   4   0   41.49    2.15
  -6   4   0   42.40    2.15
  -6   4   0   42.86    2.01
  -6   4   0   42.03    1.94
  -6   4   0   43.08    1.85
  -6   4   0   38.99    2.06
   5  -4   0   60.14    1.96
   5  -4   0   61.11    2.64
   5  -4   0   65.94    2.59
   5  -4   0   59.07    1.96
   5  -4   0   65.10    2.57
   5  -4   0   62.41    2.12
   5  -4   0   61.87    1.60
   5  -4   0   58.42    2.31
   5  -4   0   61.18    2.46
   5  -4   0   58.14    2.23
   5  -4   0   59.00    2.23
  -5   4   0   62.56    1.84
  -5   4   0   66.12    2.71
  -5   4   0   60.53    2.49
  -5   4   0   63.74    2.38
  -5   4   0   60.15    2.14
  -5   4   0   61.24    2.24
  -5   4   0   62.09    2.48
  -5   4   0   60.78    2.46
   4  -4   0    0.13    0.26
   4  -4   0   -0.09    0.24
   4  -4   0    0.48    0.30
   4  -4   0    0.21    0.28
   4  -4   0    0.04    0.29
   4  -4   0   -0.10    0.24
   4  -4   0    0.22    0.34
   4  -4   0    0.31    0.26
   4  -4   0    0.78    0.38
   4  -4   0    0.65    0.37
   4  -4   0    0.32    0.25
  -4   4   0    0.25    0.29
  -4   4   0    0.06    0.30
  -4   4   0    0.64    0.32
  -4   4   0   -0.11    0.27
  -4   4   0    0.42    0.36
  -4   4   0    0.55    0.31
  -4   4   0    0.02    0.27
  -4   4   0    0.26    0.21
  -4   4   0    0.54    0.31
   3  -4   0   22.12    1.19
   3  -4   0   22.66    1.22
   3  -4   0   21.28    1.31
   3  -4   0   21.18    1.03
   3  -4   0   23.42    1.05
   3  -4   0   23.69    1.28
   3  -4   0   22.30    1.27
   3  -4   0   25.07    1.22
   3  -4   0   22.42    1.21
  -3   4   0   20.35    1.28
  -3   4   0   20.52    1.22
  -3   4   0   23.46    1.27
  -3   4   0   23.05    1.27
  -3   4   0   21.25    1.19
  -3   4   0   22.11    1.06
  -3   4   0   23.18    1.21
  -3   4   0   22.04    1.10
  -3   4   0   22.56    1.05
  -3   4   0   21.12    1.25
   2  -4   0  143.33    4.21
   2  -4   0  135.59    3.31
   2  -4   0  137.13    3.46
   2  -4   0  138.64    3.79
   2  -4   0  134.61    3.48
   2  -4   0  141.71    3.82
   2  -4   0  138.66    3.76
   2  -4   0  133.58    3.81
   2  -4   0  139.80    3.63
   2  -4   0  132.95    3.86
   2  -4   0  134.74    3.97
  -2   4   0  134.13    3.31
  -2   4   0  133.81    3.44
  -2   4   0  133.35    4.00
  -2   4   0  129.35    3.06
  -2   4   0  133.37    3.93
  -2   4   0  132.86    3.48
  -2   4   0  134.06    3.81
  -2   4   0  141.89    3.93
  -2   4   0  137.38    3.78
  -2   4   0  135.76    3.78
   1  -4   0  115.55    3.56
   1  -4   0  106.10    3.40
   1  -4   0  122.93    2.97
   1  -4   0  117.71    3.41
   1  -4   0  121.71    3.63
   1  -4   0  118.00    3.46
   1  -4   0  111.24    3.29
   1  -4   0  117.94    3.68
   1  -4   0  122.03    3.16
   1  -4   0  112.11    3.30
   1  -4   0  112.26    3.80
  -1   4   0  115.87    3.38
  -1   4   0  113.84    3.01
  -1   4   0  108.55    3.65
  -1   4   0  115.05    2.91
  -1   4   0  111.63    3.02
  -1   4   0  112.59    3.35
  -1   4   0  116.38    3.69
  -1   4   0  119.06    3.62
  -1   4   0  112.75    3.45
   0  -4   0  278.68    7.50
   0  -4   0  274.45    6.89
   0  -4   0  279.84    6.94
   0  -4   0  273.00    5.99
   0  -4   0  266.88    7.16
   0  -4   0  270.87    6.74
   0  -4   0  283.25    6.38
   0  -4   0  274.63    7.06
   0  -4   0  268.44    6.26
   0  -4   0  271.03    7.10
   0  -4   0  280.30    6.49
   0   4   0  269.82    6.23
   0   4   0  274.21    6.17
   0   4   0  268.89    7.10
   0   4   0  273.12    7.09
   0   4   0  278.05    5.93
   0   4   0  271.02    7.16
   0   4   0  282.07    6.87
   0   4   0  265.33    7.00
  -1  -4   0  477.96   10.61
  -1  -4   0  492.62   11.32
  -1  -4   0  474.68    9.93
  -1  -4   0  487.51   11.21
  -1  -4   0  461.10   11.17
  -1  -4   0  481.90   10.30
  -1  -4   0  481.83   10.20
  -1  -4   0  472.83   11.24
  -1  -4   0  483.27   11.82
  -1  -4   0  484.00   11.33
   1   4   0  468.22   11.32
   1   4   0  472.93   10.39
   1   4   0  479.39   11.22
   1   4   0  471.36   11.26
   1   4   0  487.37   11.41
   1   4   0  486.62   10.15
   1   4   0  485.46    9.84
   1   4   0  484.45   11.76
   1   4   0  471.28   11.35
  -2  -4   0  287.28    6.75
  -2  -4   0  303.90    8.06
  -2  -4   0  289.34    6.95
  -2  -4   0  295.22    7.53
  -2  -4   0  295.19    7.09
  -2  -4   0  295.22    7.71
  -2  -4   0  303.81    7.70
  -2  -4   0  294.45    6.71
  -2  -4   0  297.38    7.54
   2   4   0  303.38    7.64
   2   4   0  276.21    7.59
   2   4   0  306.36    7.56
   2   4   0  293.74    7.95
   2   4   0  290.69    6.55
   2   4   0  287.46    6.71
   2   4   0  308.97    7.67
   2   4   0  284.39    6.80
  -3  -4   0  160.59    5.04
  -3  -4   0  165.60    5.08
  -3  -4   0  159.71    4.85
  -3  -4   0  161.10    5.25
  -3  -4   0  158.08    4.38
   3   4   0  173.62    5.08
   3   4   0  163.85    4.49
   3   4   0  166.88    5.00
   3   4   0  152.11    4.93
   3   4   0  168.19    4.91
   3   4   0  161.25    4.21
   3   4   0  155.59    4.03
   3   4   0  169.44    5.27
  -4  -4   0   19.80    1.59
  -4  -4   0   22.61    1.75
  -4  -4   0   20.96    1.44
  -4  -4   0   22.18    1.58
  -4  -4   0   23.42    1.47
   4   4   0   23.15    1.64
   4   4   0   21.98    1.46
   4   4   0   19.94    1.25
   4   4   0   20.78    1.61
   4   4   0   20.95    1.54
   4   4   0   21.65    1.00
   4   4   0   22.78    1.66
   4   4   0   22.95    1.74
  -5  -4   0    6.79    1.04
  -5  -4   0    7.66    1.24
   5   4   0    8.31    1.32
   5   4   0    5.60    1.00
   5   4   0    5.35    0.94
   5   4   0    6.04    1.05
   5   4   0    6.59    0.90
   5   4   0    6.13    1.12
  -6  -4   0    0.57    0.55
  -6  -4   0    0.24    0.53
   6   4   0   -0.02    0.49
   6   4   0    0.35    0.52
   6   4   0    0.24    0.70
   6   4   0    0.35    0.54
   6   4   0    0.36    0.57
  -7  -4   0   14.33    1.72
   7   4   0    9.55    1.49
   7   4   0   15.47    1.96
   7   4   0   11.66    1.53
  -8  -4   0   30.48    2.32
   8   4   0   26.57    2.16
   8   4   0   30.31    3.10
  10  -5   0    2.47    0.98
 -10   5   0    2.58    0.90
   9  -5   0    1.12    0.75
   9  -5   0    1.18    0.52
   9  -5   0    2.40    0.61
  -9   5   0    2.30    0.89
  -9   5   0    1.58    0.70
   8  -5   0    9.73    1.16
   8  -5   0   11.31    1.57
   8  -5   0   11.89    1.46
   8  -5   0   10.31    1.23
   8  -5   0    9.92    1.07
   8  -5   0   12.34    1.49
  -8   5   0   11.54    1.32
  -8   5   0    9.88    1.31
   7  -5   0   34.27    1.97
   7  -5   0   33.72    1.98
   7  -5   0   36.61    2.17
   7  -5   0   37.06    2.36
   7  -5   0   35.31    1.69
   7  -5   0   35.19    1.82
   7  -5   0   31.84    2.17
   7  -5   0   34.90    1.87
   7  -5   0   37.86    1.64
   7  -5   0   37.31    1.73
  -7   5   0   34.96    2.13
  -7   5   0   35.36    1.87
  -7   5   0   37.08    1.99
   6  -5   0   62.86    2.29
   6  -5   0   60.24    2.75
   6  -5   0   62.04    1.64
   6  -5   0   61.93    2.93
   6  -5   0   60.11    2.44
   6  -5   0   58.18    2.66
   6  -5   0   64.33    2.62
   6  -5   0   60.20    2.14
   6  -5   0   63.11    2.19
   6  -5   0   61.56    2.52
  -6   5   0   62.96    2.76
  -6   5   0   61.72    2.92
  -6   5   0   67.40    2.55
  -6   5   0   61.02    2.71
  -6   5   0   62.12    2.38
   5  -5   0  104.10    2.93
   5  -5   0  105.26    3.65
   5  -5   0  104.49    3.87
   5  -5   0  105.98    2.76
   5  -5   0  102.45    3.42
   5  -5   0  101.00    3.14
   5  -5   0  102.37    3.35
   5  -5   0  106.72    3.33
   5  -5   0  101.30    3.61
   5  -5   0  102.90    3.56
   5  -5   0  107.12    3.04
  -5   5   0  103.84    3.65
  -5   5   0  110.55    3.19
  -5   5   0  110.62    3.95
  -5   5   0  106.95    3.27
  -5   5   0  105.49    3.67
  -5   5   0  108.26    3.63
  -5   5   0  105.21    3.43
  -5   5   0  100.23    2.77
  -5   5   0  104.38    3.65
   4  -5   0  149.45    4.06
   4  -5   0  150.17    4.34
   4  -5   0  147.78    4.54
   4  -5   0  153.01    4.85
   4  -5   0  153.36    4.49
   4  -5   0  164.06    4.63
   4  -5   0  150.95    4.46
   4  -5   0  141.25    4.29
   4  -5   0  154.98    4.20
   4  -5   0  153.21    3.95
  -4   5   0  153.43    4.07
  -4   5   0  155.74    4.62
  -4   5   0  151.09    3.92
  -4   5   0  159.36    4.36
  -4   5   0  147.24    4.44
  -4   5   0  150.17    4.49
  -4   5   0  150.41    4.62
  -4   5   0  142.21    4.50
  -4   5   0  152.16    4.83
   3  -5   0   80.20    2.36
   3  -5   0   71.97    2.40
   3  -5   0   78.36    2.74
   3  -5   0   72.05    2.37
   3  -5   0   79.20    3.06
   3  -5   0   79.77    2.65
   3  -5   0   74.58    2.67
   3  -5   0   74.46    2.71
   3  -5   0   73.93    2.73
   3  -5   0   74.88    2.78
  -3   5   0   76.38    2.45
  -3   5   0   75.75    2.82
  -3   5   0   75.39    2.97
  -3   5   0   72.57    2.77
  -3   5   0   77.22    2.92
  -3   5   0   72.51    2.65
  -3   5   0   79.80    2.80
  -3   5   0   75.61    2.71
  -3   5   0   77.07    2.36
   2  -5   0  124.24    3.74
   2  -5   0  126.57    3.69
   2  -5   0  111.96    3.68
   2  -5   0  120.80    3.40
   2  -5   0  115.71    3.92
   2  -5   0  123.30    3.36
   2  -5   0  118.51    3.58
   2  -5   0  120.76    3.20
   2  -5   0  123.12    3.77
   2  -5   0  123.53    3.92
  -2   5   0  116.10    3.72
  -2   5   0  120.06    4.01
  -2   5   0  124.72    3.04
  -2   5   0  117.90    3.86
  -2   5   0  119.77    4.16
  -2   5   0  124.33    3.99
  -2   5   0  119.01    3.17
  -2   5   0  124.98    3.72
  -2   5   0  120.72    3.33
  -2   5   0  120.93    3.32
   1  -5   0   74.18    2.79
   1  -5   0   77.95    3.06
   1  -5   0   74.04    3.15
   1  -5   0   77.32    2.58
   1  -5   0   74.10    2.39
   1  -5   0   77.28    2.68
   1  -5   0   73.12    2.73
   1  -5   0   79.16    2.81
   1  -5   0   77.62    3.01
   1  -5   0   78.49    2.90
   1  -5   0   78.68    2.38
  -1   5   0   71.37    3.03
  -1   5   0   73.66    2.44
  -1   5   0   77.66    2.33
  -1   5   0   83.62    3.16
  -1   5   0   79.61    2.91
  -1   5   0   75.47    2.96
  -1   5   0   75.09    2.32
   0  -5   0   76.50    2.41
   0  -5   0   78.60    2.90
   0  -5   0   78.95    2.75
   0  -5   0   77.19    2.92
   0  -5   0   77.79    2.81
   0  -5   0   78.00    3.03
   0  -5   0   74.91    2.63
   0  -5   0   71.90    2.42
   0  -5   0   76.73    3.25
   0  -5   0   72.10    2.97
   0  -5   0   75.71    3.07
   0   5   0   74.82    2.32
   0   5   0   75.19    2.31
   0   5   0   79.57    3.02
   0   5   0   72.93    2.49
   0   5   0   74.29    3.04
   0   5   0   69.77    3.01
   0   5   0   77.86    2.84
  -1  -5   0   22.59    1.56
  -1  -5   0   19.01    1.43
  -1  -5   0   21.27    1.18
  -1  -5   0   20.28    1.37
  -1  -5   0   18.34    1.14
  -1  -5   0   22.03    1.38
  -1  -5   0   19.15    1.43
   1   5   0   19.16    1.41
   1   5   0   20.89    1.53
   1   5   0   20.24    1.48
   1   5   0   21.94    1.30
   1   5   0   20.40    1.13
   1   5   0   19.70    1.49
   1   5   0   21.57    1.58
   1   5   0   17.95    1.33
   1   5   0   19.22    1.00
  -2  -5   0    1.35    0.55
  -2  -5   0    0.68    0.43
  -2  -5   0    1.18    0.49
  -2  -5   0    0.66    0.42
  -2  -5   0    0.68    0.47
  -2  -5   0    0.74    0.45
  -2  -5   0    0.89    0.60
  -2  -5   0    0.55    0.38
   2   5   0    0.60    0.48
   2   5   0    0.53    0.44
   2   5   0    0.29    0.32
   2   5   0    1.13    0.48
   2   5   0    0.59    0.27
   2   5   0    0.75    0.36
   2   5   0    0.82    0.47
   2   5   0    0.56    0.39
  -3  -5   0   10.48    1.24
  -3  -5   0    8.68    1.18
  -3  -5   0    8.65    1.05
  -3  -5   0   11.23    1.45
  -3  -5   0   11.93    1.44
  -3  -5   0   12.48    1.30
  -3  -5   0    9.45    1.22
   3   5   0   10.15    1.33
   3   5   0    8.37    1.17
   3   5   0   11.59    1.36
   3   5   0   10.87    1.30
   3   5   0   10.10    0.71
   3   5   0   11.95    1.50
   3   5   0   10.92    1.06
   3   5   0   12.92    1.34
  -4  -5   0   30.76    1.90
  -4  -5   0   40.70    2.31
   4   5   0   41.25    1.86
   4   5   0   37.21    2.02
   4   5   0   35.17    2.31
   4   5   0   37.77    2.32
   4   5   0   35.12    2.17
  -5  -5   0   95.09    3.66
  -5  -5   0   98.05    4.06
   5   5   0   96.67    3.84
   5   5   0   96.44    3.24
   5   5   0  101.80    4.36
   5   5   0  101.60    4.24
   5   5   0   98.61    3.69
   5   5   0   99.04    4.07
  -6  -5   0   87.05    3.70
   6   5   0   95.43    4.17
   6   5   0   96.46    3.96
   6   5   0   91.49    4.51
   6   5   0   87.54    3.65
  -7  -5   0   78.64    3.66
   7   5   0   74.72    3.67
   7   5   0   82.23    3.63
  10  -6   0   48.33    2.94
 -10   6   0   51.49    2.98
   9  -6   0   93.11    3.74
   9  -6   0   78.10    2.78
   9  -6   0   78.36    3.52
   9  -6   0   77.43    2.93
  -9   6   0   78.58    3.52
   8  -6   0   74.90    2.95
   8  -6   0   72.06    2.72
   8  -6   0   72.99    3.07
   8  -6   0   81.19    3.32
   8  -6   0   76.63    2.70
  -8   6   0   73.03    3.02
  -8   6   0   72.15    3.17
   7  -6   0   86.60    3.44
   7  -6   0   91.02    2.96
   7  -6   0   89.00    3.02
   7  -6   0   81.20    3.16
   7  -6   0   87.42    2.90
   7  -6   0   90.47    3.67
   7  -6   0   88.05    3.37
  -7   6   0   94.80    3.26
  -7   6   0   82.90    3.26
   6  -6   0   71.00    2.88
   6  -6   0   63.93    2.69
   6  -6   0   62.53    2.39
   6  -6   0   62.68    2.85
   6  -6   0   64.93    2.65
   6  -6   0   63.21    2.35
   6  -6   0   64.49    2.29
   6  -6   0   59.13    1.92
   6  -6   0   63.17    3.09
   6  -6   0   64.65    2.96
  -6   6   0   64.65    2.87
  -6   6   0   62.40    2.46
  -6   6   0   61.43    2.59
   5  -6   0    8.98    1.33
   5  -6   0    6.87    0.95
   5  -6   0    8.34    1.16
   5  -6   0    6.90    0.87
   5  -6   0    8.99    0.90
   5  -6   0    8.74    1.13
   5  -6   0    9.03    1.11
   5  -6   0    5.82    0.99
   5  -6   0    6.71    1.06
   5  -6   0    8.09    0.95
  -5   6   0    9.72    1.41
  -5   6   0    6.07    1.03
  -5   6   0    8.36    1.20
  -5   6   0    7.52    1.07
  -5   6   0   10.02    1.13
  -5   6   0    9.05    1.25
  -5   6   0    5.49    0.76
   4  -6   0   10.26    1.04
   4  -6   0    8.74    1.02
   4  -6   0    9.36    1.17
   4  -6   0    9.09    1.15
   4  -6   0    9.66    1.12
   4  -6   0    8.80    0.94
   4  -6   0   10.47    1.20
   4  -6   0    9.59    1.33
   4  -6   0    7.40    0.99
  -4   6   0   11.09    1.36
  -4   6   0    9.13    1.15
  -4   6   0   10.56    1.10
  -4   6   0    8.31    1.08
  -4   6   0   10.33    1.26
  -4   6   0    9.42    1.18
  -4   6   0    8.51    0.93
  -4   6   0    6.38    0.85
  -4   6   0    7.82    1.00
   3  -6   0   13.76    1.07
   3  -6   0   13.71    0.97
   3  -6   0   13.05    1.32
   3  -6   0   14.15    1.16
   3  -6   0   14.43    1.21
   3  -6   0   14.68    1.27
   3  -6   0   14.99    1.27
   3  -6   0   14.60    1.49
  -3   6   0   14.75    1.08
  -3   6   0   14.20    1.15
  -3   6   0   17.12    1.30
  -3   6   0   13.58    0.66
  -3   6   0   11.81    1.28
  -3   6   0   15.11    1.28
  -3   6   0   13.06    1.37
  -3   6   0   14.22    1.55
  -3   6   0   15.74    1.04
   2  -6   0   58.79    2.54
   2  -6   0   56.93    2.54
   2  -6   0   62.70    2.93
   2  -6   0   60.25    2.42
   2  -6   0   64.75    2.40
   2  -6   0   54.69    2.67
   2  -6   0   60.59    2.65
   2  -6   0   62.05    2.54
   2  -6   0   56.16    2.12
  -2   6   0   59.62    2.12
  -2   6   0   60.24    2.94
  -2   6   0   55.82    2.42
  -2   6   0   56.18    2.52
  -2   6   0   56.19    1.91
  -2   6   0   59.86    2.23
  -2   6   0   56.27    2.04
  -2   6   0   61.45    2.72
  -2   6   0   62.13    2.81
   1  -6   0  100.58    3.52
   1  -6   0   98.36    4.02
   1  -6   0  100.37    3.28
   1  -6   0   96.41    3.36
   1  -6   0  101.95    3.82
   1  -6   0  101.21    3.11
   1  -6   0   95.41    3.78
   1  -6   0  103.72    3.75
   1  -6   0   94.11    3.52
   1  -6   0  104.44    3.61
   1  -6   0   94.86    3.56
  -1   6   0  103.23    3.83
  -1   6   0  103.01    3.67
  -1   6   0   97.54    2.91
  -1   6   0  102.78    3.18
  -1   6   0   97.93    3.90
  -1   6   0   92.09    2.89
   0  -6   0  130.09    3.75
   0  -6   0  121.67    3.87
   0  -6   0  121.74    4.39
   0  -6   0  130.30    4.82
   0  -6   0  128.86    4.07
   0  -6   0  125.83    4.51
   0  -6   0  126.72    4.31
   0  -6   0  132.57    4.20
   0  -6   0  128.44    4.32
   0   6   0  122.18    3.46
   0   6   0  127.13    3.77
   0   6   0  121.19    3.46
   0   6   0  125.27    4.54
   0   6   0  125.31    4.16
   0   6   0  121.42    4.47
   0   6   0  127.18    4.44
   0   6   0  122.01    3.25
  -1  -6   0  157.89    5.26
  -1  -6   0  168.58    4.68
  -1  -6   0  167.09    4.87
  -1  -6   0  162.05    5.57
  -1  -6   0  157.19    5.27
  -1  -6   0  169.67    5.52
  -1  -6   0  165.20    5.01
  -1  -6   0  170.54    5.01
   1   6   0  164.94    5.44
   1   6   0  171.93    5.25
   1   6   0  161.73    4.27
   1   6   0  162.00    5.43
   1   6   0  164.05    4.69
   1   6   0  164.11    5.38
   1   6   0  169.53    5.55
   1   6   0  170.35    5.52
   1   6   0  165.16    4.33
  -2  -6   0   43.70    2.52
  -2  -6   0   45.75    2.68
  -2  -6   0   46.53    2.55
  -2  -6   0   49.09    2.38
  -2  -6   0   48.03    2.36
  -2  -6   0   47.64    2.14
   2   6   0   51.67    2.62
   2   6   0   46.69    2.46
   2   6   0   44.35    2.15
   2   6   0   47.56    2.63
   2   6   0   54.43    2.82
   2   6   0   49.45    2.02
   2   6   0   49.67    2.68
   2   6   0   45.51    1.71
  -3  -6   0   55.30    2.60
  -3  -6   0   46.59    2.55
  -3  -6   0   58.50    2.94
  -3  -6   0   55.12    2.66
   3   6   0   56.37    2.24
   3   6   0   52.98    1.79
   3   6   0   55.08    2.53
   3   6   0   53.38    2.93
   3   6   0   59.20    3.05
   3   6   0   60.21    2.93
  -4  -6   0   77.34    3.62
  -4  -6   0   77.30    3.28
   4   6   0   82.30    3.81
   4   6   0   71.60    3.65
   4   6   0   85.33    3.71
   4   6   0   78.38    3.23
   4   6   0   75.10    2.77
  -5  -6   0   22.90    2.14
   5   6   0   23.94    2.16
   5   6   0   23.66    1.88
   5   6   0   22.55    2.35
  -6  -6   0    3.00    0.97
   6   6   0    4.47    1.21
   6   6   0    3.22    0.96
   6   6   0    2.14    0.97
  -7  -6   0    0.01    0.76
   7   6   0    0.99    0.88
   7   6   0    0.80    1.12
  10  -7   0    9.37    1.54
  10  -7   0   10.31    1.69
 -10   7   0   12.68    1.77
   9  -7   0    0.07    0.75
   9  -7   0   -0.08    0.48
  -9   7   0    0.56    0.63
   8  -7   0    4.69    0.99
   8  -7   0    4.38    1.07
   8  -7   0    4.19    0.83
   8  -7   0    4.16    0.97
  -8   7   0    4.11    0.99
  -8   7   0    4.28    0.96
   7  -7   0   12.45    1.56
   7  -7   0   10.00    1.16
   7  -7   0   12.35    1.58
   7  -7   0   12.50    1.24
   7  -7   0   13.13    1.57
  -7   7   0   12.46    1.32
  -7   7   0   10.82    1.35
   6  -7   0   77.22    2.79
   6  -7   0   70.18    2.47
   6  -7   0   68.61    3.14
   6  -7   0   71.56    2.71
   6  -7   0   75.16    3.10
   6  -7   0   70.47    2.55
   6  -7   0   72.18    3.16
   6  -7   0   66.07    2.90
  -6   7   0   75.44    2.96
  -6   7   0   71.86    2.77
   5  -7   0  104.71    3.75
   5  -7   0  107.06    3.46
   5  -7   0  107.12    4.17
   5  -7   0  106.78    3.48
   5  -7   0  114.27    4.01
   5  -7   0  110.08    4.41
   5  -7   0  103.61    4.00
   5  -7   0  105.55    3.78
   5  -7   0  110.89    3.96
  -5   7   0  108.00    3.95
  -5   7   0  104.32    3.38
  -5   7   0  103.84    4.12
  -5   7   0  110.09    3.61
  -5   7   0   97.82    4.42
   4  -7   0  144.20    4.88
   4  -7   0  132.15    3.53
   4  -7   0  151.28    4.72
   4  -7   0  138.50    4.16
   4  -7   0  149.81    4.30
   4  -7   0  147.08    4.59
   4  -7   0  136.88    4.64
   4  -7   0  134.34    5.12
   4  -7   0  139.07    4.57
   4  -7   0  150.47    4.87
  -4   7   0  148.95    4.12
  -4   7   0  140.24    4.67
  -4   7   0  142.69    5.01
  -4   7   0  151.12    4.89
  -4   7   0  149.40    4.97
  -4   7   0  150.02    4.34
   3  -7   0  111.63    3.48
   3  -7   0  110.64    4.15
   3  -7   0  109.38    4.43
   3  -7   0  116.01    3.93
   3  -7   0  111.59    4.01
   3  -7   0  111.37    4.13
   3  -7   0  110.03    3.59
   3  -7   0  113.62    4.02
   3  -7   0  108.82    3.81
  -3   7   0  107.00    3.31
  -3   7   0  111.12    2.93
  -3   7   0  109.11    3.89
  -3   7   0  110.65    4.26
  -3   7   0  106.13    3.49
  -3   7   0  103.66    4.37
  -3   7   0  106.12    3.98
  -3   7   0  114.49    4.16
   2  -7   0   69.38    3.22
   2  -7   0   70.85    3.00
   2  -7   0   68.69    2.53
   2  -7   0   63.02    2.93
   2  -7   0   82.91    3.74
   2  -7   0   65.19    2.69
   2  -7   0   64.73    3.28
   2  -7   0   68.97    2.96
   2  -7   0   61.85    2.80
   2  -7   0   70.04    2.81
  -2   7   0   65.36    2.38
  -2   7   0   66.26    2.38
  -2   7   0   71.29    2.37
  -2   7   0   66.38    3.20
  -2   7   0   62.70    2.79
  -2   7   0   65.63    3.11
  -2   7   0   69.44    2.61
  -2   7   0   66.48    3.02
   1  -7   0   72.31    2.66
   1  -7   0   72.72    2.95
   1  -7   0   74.27    3.14
   1  -7   0   78.11    3.66
   1  -7   0   75.91    3.22
   1  -7   0   76.23    3.15
   1  -7   0   70.61    3.36
   1  -7   0   78.46    2.99
   1  -7   0   71.01    3.26
   1  -7   0   73.79    3.19
  -1   7   0   71.96    3.34
  -1   7   0   76.60    3.12
  -1   7   0   74.66    3.50
  -1   7   0   74.49    2.56
  -1   7   0   76.28    2.80
  -1   7   0   67.45    3.15
  -1   7   0   69.35    2.45
   0  -7   0   37.96    2.06
   0  -7   0   36.87    1.83
   0  -7   0   36.38    2.49
   0  -7   0   38.83    2.28
   0  -7   0   38.94    2.43
   0  -7   0   39.08    2.11
   0  -7   0   40.72    2.27
   0  -7   0   36.14    2.20
   0  -7   0   37.10    2.32
   0   7   0   35.03    2.34
   0   7   0   38.57    1.54
   0   7   0   32.66    1.83
   0   7   0   39.80    2.34
   0   7   0   38.13    2.15
   0   7   0   34.47    2.36
   0   7   0   38.43    1.63
   0   7   0   39.31    1.77
  -1  -7   0    4.67    1.07
  -1  -7   0    4.49    1.08
  -1  -7   0    5.60    0.82
  -1  -7   0    3.12    0.84
  -1  -7   0    4.90    1.04
   1   7   0    5.69    0.72
   1   7   0    5.36    1.08
   1   7   0    4.26    1.00
   1   7   0    4.93    0.89
   1   7   0    3.74    0.68
   1   7   0    5.96    1.28
  -2  -7   0    0.52    0.55
  -2  -7   0    1.37    0.66
  -2  -7   0    0.83    0.61
   2   7   0    0.92    0.61
   2   7   0    1.13    0.45
   2   7   0    0.78    0.31
   2   7   0    0.57    0.61
   2   7   0    0.54    0.55
   2   7   0    1.36    0.69
  -3  -7   0   12.59    1.70
  -3  -7   0   10.87    1.46
  -3  -7   0   13.68    1.66
   3   7   0   10.94    1.57
   3   7   0   12.28    1.22
   3   7   0   10.92    1.68
   3   7   0   11.35    1.72
   3   7   0   10.05    1.31
  -4  -7   0   11.75    1.59
   4   7   0   14.83    1.87
   4   7   0   16.75    1.83
   4   7   0   15.35    2.03
  -5  -7   0   24.75    2.33
   5   7   0   23.86    2.22
   5   7   0   23.84    2.53
  -6  -7   0   45.64    2.99
   6   7   0   40.87    3.33
   6   7   0   39.67    2.72
   6   7   0   42.23    2.99
   9  -8   0   55.29    3.18
  -9   8   0   57.78    3.10
   8  -8   0  116.17    3.96
   8  -8   0  110.94    4.44
   8  -8   0  110.68    4.10
  -8   8   0  120.68    4.19
  -8   8   0  123.02    4.47
   7  -8   0   93.87    3.72
   7  -8   0  101.24    3.58
   7  -8   0   98.98    3.96
  -7   8   0   98.29    3.81
  -7   8   0   99.35    3.61
   6  -8   0   66.03    3.16
   6  -8   0   60.51    2.87
   6  -8   0   64.50    2.74
   6  -8   0   67.21    3.11
   6  -8   0   61.76    2.50
  -6   8   0   61.73    2.83
  -6   8   0   63.66    2.70
   5  -8   0   34.66    2.32
   5  -8   0   35.93    2.30
   5  -8   0   38.69    2.29
   5  -8   0   39.77    2.11
   5  -8   0   33.22    2.08
  -5   8   0   36.89    2.07
  -5   8   0   38.21    1.95
   4  -8   0    8.80    1.11
   4  -8   0   12.00    1.45
   4  -8   0    6.32    1.12
   4  -8   0   10.94    1.45
   4  -8   0   12.63    1.52
   4  -8   0   10.95    1.30
  -4   8   0    9.46    1.17
  -4   8   0    8.54    1.36
  -4   8   0    8.58    1.03
   3  -8   0    0.00    0.45
   3  -8   0    0.50    0.53
   3  -8   0    0.02    0.44
   3  -8   0    0.57    0.56
   3  -8   0   -0.12    0.30
  -3   8   0    0.60    0.41
  -3   8   0    0.56    0.59
  -3   8   0    0.13    0.42
  -3   8   0    0.92    0.62
  -3   8   0   -0.07    0.39
  -3   8   0   -0.36    0.43
  -3   8   0    0.14    0.29
   2  -8   0   35.89    2.29
   2  -8   0   36.62    2.22
   2  -8   0   36.15    2.13
   2  -8   0   39.12    2.15
   2  -8   0   37.49    1.89
   2  -8   0   35.33    2.43
  -2   8   0   37.23    1.77
  -2   8   0   36.67    2.48
  -2   8   0   35.27    1.93
  -2   8   0   34.52    1.77
  -2   8   0   37.84    2.48
   1  -8   0  134.03    5.18
   1  -8   0  132.57    4.68
   1  -8   0  139.76    4.29
   1  -8   0  141.12    4.58
   1  -8   0  142.31    4.94
  -1   8   0  131.66    3.93
  -1   8   0  133.59    3.97
  -1   8   0  145.09    5.39
  -1   8   0  140.83    4.36
  -1   8   0  134.00    4.29
  -1   8   0  119.01    4.95
   0  -8   0  100.07    4.38
   0  -8   0   99.36    3.79
   0  -8   0  105.47    4.05
   0   8   0   94.96    3.52
   0   8   0  106.84    4.60
   0   8   0  103.07    3.29
   0   8   0   98.22    4.35
   0   8   0   91.79    4.09
   0   8   0   91.99    2.85
   0   8   0   97.50    3.07
  -1  -8   0   83.67    3.50
  -1  -8   0   77.41    3.54
  -1  -8   0   80.95    3.94
   1   8   0   77.85    3.18
   1   8   0   79.55    3.93
   1   8   0   76.59    2.54
   1   8   0   89.35    3.00
   1   8   0   77.83    3.98
   1   8   0   77.38    3.77
  -2  -8   0  114.71    4.38
  -2  -8   0  116.93    5.02
  -2  -8   0  113.91    4.53
   2   8   0  118.35    4.17
   2   8   0  113.89    3.65
   2   8   0  121.13    5.04
   2   8   0  109.72    4.80
  -3  -8   0   66.13    3.31
  -3  -8   0   70.17    3.51
   3   8   0   61.94    3.02
   3   8   0   63.71    3.62
  -4  -8   0   28.34    2.64
   4   8   0   28.67    2.15
   4   8   0   25.10    2.75
  -5  -8   0    7.02    1.59
   5   8   0    6.76    1.66
   5   8   0    7.05    1.56
   5   8   0    7.26    1.35
   9  -9   0   12.65    1.87
  -9   9   0   16.15    1.97
   8  -9   0    0.92    0.91
   8  -9   0    0.23    0.65
   8  -9   0    0.56    0.69
  -8   9   0    1.00    0.76
   7  -9   0    3.08    1.03
   7  -9   0    1.73    0.76
   7  -9   0    1.92    0.76
  -7   9   0    2.33    0.77
  -7   9   0    2.61    0.90
   6  -9   0   21.65    1.70
   6  -9   0   18.89    2.02
   6  -9   0   24.12    1.67
   6  -9   0   21.82    1.78
  -6   9   0   20.03    1.91
  -6   9   0   21.87    1.92
   5  -9   0   65.28    3.18
   5  -9   0   53.41    2.65
   5  -9   0   53.82    2.79
   5  -9   0   51.95    2.99
  -5   9   0   56.35    2.71
  -5   9   0   53.06    2.48
   4  -9   0   72.95    3.52
   4  -9   0   83.80    3.36
   4  -9   0   72.18    3.43
  -4   9   0   70.11    2.87
  -4   9   0   75.10    3.15
   3  -9   0  139.18    4.98
   3  -9   0  140.14    5.13
   3  -9   0  144.83    4.78
  -3   9   0  142.10    4.31
  -3   9   0  144.43    4.04
  -3   9   0  135.22    5.49
  -3   9   0  139.09    4.57
   2  -9   0  153.91    5.37
   2  -9   0  149.47    5.18
   2  -9   0  146.55    4.95
   2  -9   0  146.64    5.87
  -2   9   0  146.59    4.48
  -2   9   0  152.46    5.80
  -2   9   0  145.08    4.69
  -2   9   0  142.37    4.34
   1  -9   0   74.23    3.84
   1  -9   0   88.41    3.83
   1  -9   0   76.97    3.41
   1  -9   0   79.48    3.60
  -1   9   0   73.18    2.82
  -1   9   0   75.99    3.19
  -1   9   0   77.60    4.00
  -1   9   0   72.21    2.78
  -1   9   0   73.89    3.10
   0  -9   0   29.65    2.17
   0  -9   0   29.96    2.34
   0  -9   0   30.77    2.29
   0   9   0   31.50    1.76
   0   9   0   27.00    2.46
   0   9   0   27.69    2.01
   0   9   0   30.18    2.00
  -1  -9   0   10.18    1.59
  -1  -9   0    8.88    1.44
   1   9   0    7.97    1.44
   1   9   0    9.91    1.15
   1   9   0    9.31    1.71
   1   9   0    9.19    1.31
  -2  -9   0    1.61    0.89
  -2  -9   0    0.98    0.80
   2   9   0    1.70    1.00
   2   9   0    1.35    0.95
   2   9   0    0.86    0.60
  -3  -9   0    4.25    1.24
   3   9   0    4.18    1.30
   3   9   0    2.74    0.93
  -4  -9   0   15.86    2.18
   4   9   0   16.29    1.94
   4   9   0   15.71    2.36
   8 -10   0   71.48    3.31
   8 -10   0   61.14    3.10
   8 -10   0   63.80    3.60
  -8  10   0   64.56    3.40
   7 -10   0   72.52    3.34
   7 -10   0   69.90    3.69
   7 -10   0   71.18    3.40
  -7  10   0   70.17    3.42
  -7  10   0   70.25    3.19
   6 -10   0   70.83    3.30
   6 -10   0   70.80    3.40
   6 -10   0   74.85    3.74
  -6  10   0   75.62    3.42
  -6  10   0   73.14    3.15
   5 -10   0   44.76    2.89
   5 -10   0   46.22    2.69
   5 -10   0   51.50    2.87
  -5  10   0   48.35    2.46
  -5  10   0   47.97    2.66
   4 -10   0   11.44    1.67
   4 -10   0   12.20    1.55
  -4  10   0   11.41    1.33
  -4  10   0   11.46    1.53
   3 -10   0    0.44    0.72
   3 -10   0    0.16    0.67
  -3  10   0    0.40    0.53
  -3  10   0   -0.02    0.55
   2 -10   0   11.75    1.64
   2 -10   0   13.28    1.77
  -2  10   0   14.16    1.71
  -2  10   0   12.90    1.41
  -2  10   0   12.95    1.42
   1 -10   0   35.45    2.51
   1 -10   0   32.49    2.36
  -1  10   0   33.89    2.20
  -1  10   0   30.76    2.13
  -1  10   0   34.74    1.97
   0 -10   0   74.21    3.74
   0 -10   0   73.22    3.64
   0  10   0   70.27    3.26
   0  10   0   76.12    2.97
   0  10   0   73.26    3.51
  -1 -10   0   87.10    4.17
  -1 -10   0   81.64    3.95
   1  10   0   87.42    4.17
   1  10   0   87.90    3.74
  -2 -10   0   68.35    3.83
  -2 -10   0   69.12    3.68
   2  10   0   62.89    3.74
   2  10   0   69.40    3.35
  -3 -10   0   33.00    3.14
   3  10   0   38.71    3.15
   3  10   0   32.87    2.39
   7 -11   0   -0.27    0.67
   7 -11   0   -0.15    0.87
   7 -11   0    0.22    0.69
  -7  11   0   -0.28    0.69
   6 -11   0    2.23    0.86
   6 -11   0    1.82    1.07
  -6  11   0    1.98    0.79
  -6  11   0    1.39    0.76
   5 -11   0   21.88    2.28
   5 -11   0   19.73    2.37
  -5  11   0   20.68    1.90
  -5  11   0   17.43    1.99
   4 -11   0   51.37    3.19
   4 -11   0   50.28    3.02
  -4  11   0   50.82    2.86
  -4  11   0   49.25    2.60
   3 -11   0   81.13    3.83
   3 -11   0   82.29    3.99
  -3  11   0   79.66    3.61
  -3  11   0   76.20    3.23
   2 -11   0   86.62    4.12
   2 -11   0   80.16    3.90
  -2  11   0   88.19    3.41
  -2  11   0   84.31    3.74
   1 -11   0   72.13    3.73
   1 -11   0   82.69    4.01
  -1  11   0   70.79    3.42
  -1  11   0   78.15    3.54
   0 -11   0   60.29    3.48
   0 -11   0   48.43    3.12
   0  11   0   57.03    3.26
   0  11   0   52.23    2.92
  -1 -11   0   28.37    2.91
  -1 -11   0   20.33    2.44
   1  11   0   21.64    2.21
   1  11   0   23.27    2.60
  -2 -11   0    5.13    1.41
  -2 -11   0    3.54    1.30
   2  11   0    7.10    1.40
   2  11   0    4.45    1.46
   6 -12   0   52.48    3.47
   6 -12   0   54.10    3.29
  -6  12   0   47.18    3.00
   5 -12   0   58.31    3.64
   5 -12   0   59.45    3.39
  -5  12   0   59.34    3.29
  -5  12   0   53.88    3.15
   4 -12   0   11.44    1.90
   4 -12   0   15.16    2.06
  -4  12   0   13.02    1.76
   3 -12   0    5.09    1.39
   3 -12   0    5.61    1.36
  -3  12   0    3.99    1.10
   2 -12   0    0.48    0.94
   2 -12   0   -0.73    0.78
  -2  12   0    0.95    0.79
   1 -12   0    7.39    1.59
   1 -12   0    5.12    1.41
  -1  12   0    6.23    1.32
   0 -12   0   26.35    2.76
   0 -12   0   28.01    3.00
   0  12   0   30.45    2.71
   0  12   0   29.20    2.49
   0  12  -1   57.02    3.22
   0  12  -1   53.35    3.35
   0 -12   1   51.89    3.40
   0 -12   1   54.48    3.53
  -1  12  -1   59.05    3.28
  -1  12  -1   62.20    3.40
   1 -12   1   63.36    3.63
   1 -12   1   70.35    3.84
  -2  12  -1   54.54    3.14
   2 -12   1   52.49    3.35
   2 -12   1   60.49    3.55
  -3  12  -1   37.01    2.63
  -3  12  -1   37.36    2.39
   3 -12   1   38.67    2.77
   3 -12   1   38.40    2.91
  -4  12  -1    8.21    1.33
  -4  12  -1    7.50    1.41
   4 -12   1    7.62    1.51
   4 -12   1    9.07    1.67
  -5  12  -1    6.69    1.29
  -5  12  -1    7.54    1.48
   5 -12   1    5.04    1.35
   5 -12   1    7.06    1.66
  -6  12  -1    1.71    0.94
   6 -12   1    0.03    0.92
   6 -12   1    2.77    1.06
   2  11  -1   90.89    4.61
   2  11  -1   84.56    3.95
  -2 -11   1   79.88    4.30
   1  11  -1   61.53    3.60
   1  11  -1   60.88    3.28
  -1 -11   1   66.12    3.67
  -1 -11   1   70.06    3.84
   0  11  -1   43.72    2.75
   0  11  -1   47.25    2.93
   0 -11   1   51.66    3.23
   0 -11   1   48.44    3.08
  -1  11  -1    1.88    0.87
  -1  11  -1    3.62    1.03
  -1  11  -1    3.56    0.88
   1 -11   1    4.60    1.21
   1 -11   1    4.32    1.21
  -2  11  -1    0.19    0.61
  -2  11  -1   -0.16    0.49
  -2  11  -1    0.48    0.56
   2 -11   1   -0.05    0.68
   2 -11   1   -0.42    0.74
  -3  11  -1    7.48    1.21
  -3  11  -1    6.12    1.23
   3 -11   1    6.25    1.36
   3 -11   1    6.26    1.38
  -4  11  -1   61.86    3.19
  -4  11  -1   57.27    2.85
   4 -11   1   60.36    3.40
   4 -11   1   61.74    3.25
  -5  11  -1   70.30    3.45
  -5  11  -1   73.95    3.28
   5 -11   1   68.14    3.72
   5 -11   1   71.20    3.47
   5 -11   1   75.42    3.44
  -6  11  -1   59.87    3.23
  -6  11  -1   60.20    2.98
   6 -11   1   56.88    3.11
   6 -11   1   58.16    2.98
   6 -11   1   57.27    3.45
  -7  11  -1   36.88    2.62
   7 -11   1   33.27    2.25
   7 -11   1   35.79    3.25
   7 -11   1   34.22    2.42
  -8  11  -1   21.59    2.37
   8 -11   1   16.34    2.27
   3  10  -1   -0.17    0.69
   3  10  -1   -0.37    0.79
  -3 -10   1   -0.41    0.90
   2  10  -1    8.40    1.42
  -2 -10   1    5.58    1.34
  -2 -10   1    7.84    1.57
   1  10  -1   34.58    2.35
  -1 -10   1   30.34    2.41
  -1 -10   1   35.23    2.65
   0  10  -1   69.86    3.40
   0  10  -1   71.34    2.94
   0  10  -1   67.39    2.64
   0  10  -1   68.62    3.24
   0 -10   1   65.87    3.49
   0 -10   1   69.43    3.45
  -1  10  -1   99.33    3.61
  -1  10  -1   95.94    3.85
  -1  10  -1   93.54    3.87
   1 -10   1  115.48    4.52
   1 -10   1  106.06    4.27
  -2  10  -1   76.37    3.11
  -2  10  -1   85.37    3.54
  -2  10  -1   81.94    3.17
   2 -10   1   78.45    3.59
   2 -10   1   85.51    3.87
  -3  10  -1   94.51    3.51
  -3  10  -1   95.37    3.82
   3 -10   1   99.59    3.98
   3 -10   1   91.03    4.04
  -4  10  -1   49.40    2.68
  -4  10  -1   52.50    2.54
   4 -10   1   48.59    2.66
   4 -10   1   53.53    2.81
   4 -10   1   49.21    2.94
  -5  10  -1   25.14    1.98
  -5  10  -1   27.22    1.89
   5 -10   1   27.22    2.04
   5 -10   1   25.03    1.91
   5 -10   1   23.08    2.34
  -6  10  -1    1.67    0.72
  -6  10  -1    1.35    0.78
   6 -10   1    1.47    0.78
   6 -10   1    2.55    0.84
   6 -10   1    1.32    0.85
  -7  10  -1    0.58    0.64
  -7  10  -1    1.26    0.85
   7 -10   1    1.93    0.99
   7 -10   1    0.78    0.72
   7 -10   1    0.94    0.65
  -8  10  -1    0.76    0.79
   8 -10   1    0.24    0.82
   4   9  -1   38.59    2.65
  -4  -9   1   40.94    3.02
   3   9  -1   64.77    3.29
  -3  -9   1   70.90    3.75
   2   9  -1  127.64    3.77
   2   9  -1  128.00    6.17
   2   9  -1  137.44    4.29
   2   9  -1  132.96    4.74
  -2  -9   1  131.69    5.04
  -2  -9   1  136.54    5.25
   1   9  -1  106.95    3.47
   1   9  -1  112.58    3.79
   1   9  -1  115.00    4.19
   1   9  -1  108.46    4.98
  -1  -9   1  115.30    4.59
  -1  -9   1  114.21    4.44
   0   9  -1   81.82    2.99
   0   9  -1   92.65    3.62
   0   9  -1   97.13    4.53
   0   9  -1   85.35    3.19
   0  -9   1   85.81    3.72
   0  -9   1   87.49    3.87
   0  -9   1   93.67    4.06
  -1   9  -1   62.34    3.51
  -1   9  -1   58.09    2.76
  -1   9  -1   61.06    2.57
  -1   9  -1   60.20    2.46
   1  -9   1   64.56    3.04
   1  -9   1   61.78    3.12
   1  -9   1   58.85    3.13
  -2   9  -1    5.61    1.29
  -2   9  -1    4.49    0.77
  -2   9  -1    6.23    0.95
  -2   9  -1    3.66    0.86
  -2   9  -1    4.45    0.85
   2  -9   1    4.12    0.93
   2  -9   1    4.79    1.05
   2  -9   1    7.29    1.27
  -3   9  -1    2.37    0.66
  -3   9  -1    1.68    0.49
  -3   9  -1    1.23    0.78
  -3   9  -1    0.29    0.48
   3  -9   1    1.51    0.69
   3  -9   1    1.32    0.70
   3  -9   1    2.42    0.84
  -4   9  -1   25.14    1.80
  -4   9  -1   23.37    1.63
   4  -9   1   22.42    2.13
   4  -9   1   26.78    1.87
   4  -9   1   22.29    1.73
   4  -9   1   24.49    2.32
  -5   9  -1   57.14    2.57
  -5   9  -1   53.97    2.67
   5  -9   1   51.65    2.89
   5  -9   1   49.92    2.61
   5  -9   1   50.68    2.82
   5  -9   1   53.53    2.64
  -6   9  -1   97.71    3.63
  -6   9  -1  102.37    3.89
   6  -9   1  102.67    3.46
   6  -9   1  102.07    3.76
   6  -9   1   99.52    3.82
   6  -9   1  101.16    4.13
  -7   9  -1   99.16    3.95
  -7   9  -1   91.92    3.64
   7  -9   1   95.34    3.62
   7  -9   1  100.13    4.14
   7  -9   1   97.48    3.73
  -8   9  -1   59.88    3.14
   8  -9   1   60.73    3.26
   8  -9   1   58.27    2.69
  -9   9  -1   27.00    2.56
   9  -9   1   28.26    2.64
   5   8  -1   19.33    2.11
  -5  -8   1   19.64    2.24
   4   8  -1   15.15    1.84
  -4  -8   1   14.98    1.99
   3   8  -1    1.89    0.56
   3   8  -1    1.69    0.76
   3   8  -1    2.35    0.96
   3   8  -1    1.93    0.49
  -3  -8   1    1.90    0.94
   2   8  -1    1.82    0.59
   2   8  -1    2.05    0.55
   2   8  -1    3.09    0.99
   2   8  -1    1.88    0.77
   2   8  -1    1.57    0.81
  -2  -8   1    1.12    0.74
  -2  -8   1    2.19    0.92
  -2  -8   1    1.78    0.80
   1   8  -1   18.86    2.23
   1   8  -1   21.08    1.64
   1   8  -1   21.65    1.96
   1   8  -1   19.38    1.25
   1   8  -1   16.24    1.93
   1   8  -1   18.47    1.37
  -1  -8   1   18.29    1.89
  -1  -8   1   19.94    2.27
  -1  -8   1   22.48    1.80
   0   8  -1   26.85    2.09
   0   8  -1   26.22    1.48
   0   8  -1   25.60    1.23
   0   8  -1   29.93    2.37
   0   8  -1   27.45    1.81
   0   8  -1   26.58    2.22
   0   8  -1   30.38    1.68
   0  -8   1   26.65    1.99
   0  -8   1   28.80    2.24
   0  -8   1   33.03    2.05
  -1   8  -1   82.60    3.24
  -1   8  -1   89.42    3.98
  -1   8  -1   90.64    3.92
  -1   8  -1   83.64    2.96
  -1   8  -1   87.66    3.06
  -1   8  -1   85.11    3.94
   1  -8   1   80.75    3.80
   1  -8   1   91.12    3.74
   1  -8   1   95.81    3.72
   1  -8   1   94.74    3.53
   1  -8   1   84.98    3.50
   1  -8   1   98.70    4.77
   1  -8   1   81.22    3.05
   1  -8   1   86.02    3.92
  -2   8  -1  108.43    3.47
  -2   8  -1  100.40    4.28
  -2   8  -1  106.06    3.44
  -2   8  -1  104.80    3.66
  -2   8  -1  102.41    3.33
  -2   8  -1  108.19    4.09
  -2   8  -1  112.49    4.48
   2  -8   1  106.59    4.63
   2  -8   1  105.48    3.98
   2  -8   1  107.01    3.79
   2  -8   1  106.02    4.39
   2  -8   1  106.02    4.24
   2  -8   1  110.19    4.15
   2  -8   1  102.71    3.92
   2  -8   1  106.83    3.53
   2  -8   1  109.52    4.26
  -3   8  -1  130.41    4.00
  -3   8  -1  136.55    4.18
  -3   8  -1  136.32    5.02
  -3   8  -1  137.16    5.08
  -3   8  -1  145.73    4.87
  -3   8  -1  131.01    4.26
  -3   8  -1  133.52    3.60
   3  -8   1  130.77    4.70
   3  -8   1  131.03    5.26
   3  -8   1  130.94    4.81
   3  -8   1  139.12    4.67
   3  -8   1  139.28    4.38
   3  -8   1  140.98    4.19
   3  -8   1  137.73    4.64
  -4   8  -1   86.43    3.26
  -4   8  -1   87.52    3.09
  -4   8  -1   90.82    3.66
  -4   8  -1   85.02    3.83
   4  -8   1   93.09    3.34
   4  -8   1   89.01    3.58
   4  -8   1   85.59    3.07
   4  -8   1   80.23    3.41
   4  -8   1   88.16    3.65
   4  -8   1   84.95    2.72
   4  -8   1   90.66    3.95
   4  -8   1   88.85    4.17
   4  -8   1   87.36    3.39
  -5   8  -1   37.49    2.10
  -5   8  -1   37.82    2.57
  -5   8  -1   37.22    1.97
   5  -8   1   36.29    2.26
   5  -8   1   37.43    1.89
   5  -8   1   37.67    2.00
   5  -8   1   36.05    2.21
   5  -8   1   39.15    2.13
   5  -8   1   44.95    2.48
  -6   8  -1   32.15    1.99
  -6   8  -1   32.14    1.87
   6  -8   1   34.07    2.18
   6  -8   1   31.75    2.17
   6  -8   1   34.96    1.88
   6  -8   1   34.37    1.91
   6  -8   1   29.54    2.14
   6  -8   1   33.07    1.67
   6  -8   1   31.03    1.92
  -7   8  -1    9.09    1.28
  -7   8  -1    9.05    1.23
   7  -8   1    9.61    1.39
   7  -8   1    9.24    1.21
   7  -8   1   10.17    1.32
  -8   8  -1   -0.66    0.51
  -8   8  -1   -0.39    0.51
   8  -8   1   -0.51    0.58
   8  -8   1   -0.43    0.54
   8  -8   1   -0.20    0.49
  -9   8  -1    4.38    1.11
   9  -8   1    5.48    1.25
   9  -8   1    4.82    0.78
   6   7  -1    0.73    0.78
   6   7  -1    0.50    0.86
  -6  -7   1    0.39    0.89
   5   7  -1   11.81    1.60
  -5  -7   1   11.18    1.70
   4   7  -1   57.58    2.52
   4   7  -1   55.10    3.22
   4   7  -1   57.22    2.87
   4   7  -1   54.56    1.93
  -4  -7   1   59.88    3.03
   3   7  -1   88.65    4.22
   3   7  -1   92.39    3.22
   3   7  -1   91.75    4.19
   3   7  -1   87.15    2.84
   3   7  -1   91.76    4.09
   3   7  -1   91.38    3.59
  -3  -7   1   91.75    4.11
  -3  -7   1   85.19    3.64
   2   7  -1  112.71    4.50
   2   7  -1  114.99    3.97
   2   7  -1  116.14    4.69
   2   7  -1  108.87    3.38
   2   7  -1  106.38    4.54
   2   7  -1  110.89    3.57
  -2  -7   1  117.67    4.66
  -2  -7   1  120.56    4.26
  -2  -7   1  111.44    4.08
   1   7  -1  191.09    6.45
   1   7  -1  197.83    5.61
   1   7  -1  204.43    5.26
   1   7  -1  195.71    6.41
   1   7  -1  194.09    5.22
   1   7  -1  196.40    6.53
   1   7  -1  204.15    6.55
   1   7  -1  197.47    6.20
   1   7  -1  198.19    6.44
  -1  -7   1  200.15    6.50
  -1  -7   1  191.15    6.56
  -1  -7   1  200.87    5.57
  -1  -7   1  194.63    6.01
  -1  -7   1  210.59    6.04
  -1  -7   1  204.33    5.82
   0   7  -1  214.18    6.93
   0   7  -1  216.78    5.23
   0   7  -1  226.13    7.10
   0   7  -1  217.43    6.87
   0   7  -1  228.76    5.69
   0   7  -1  230.37    7.05
   0   7  -1  225.39    6.00
   0   7  -1  225.32    5.80
   0  -7   1  219.29    6.74
   0  -7   1  225.13    7.02
   0  -7   1  224.34    6.35
   0  -7   1  226.81    7.39
   0  -7   1  232.32    6.23
   0  -7   1  236.17    6.59
   0  -7   1  229.02    6.01
   0  -7   1  229.37    7.04
  -1   7  -1  137.06    4.13
  -1   7  -1  134.16    4.56
  -1   7  -1  134.03    4.85
  -1   7  -1  133.06    3.85
  -1   7  -1  135.87    4.73
  -1   7  -1  135.33    3.92
  -1   7  -1  131.43    4.88
   1  -7   1  130.64    4.84
   1  -7   1  137.98    5.19
   1  -7   1  136.66    4.45
   1  -7   1  134.99    4.59
   1  -7   1  128.14    4.73
   1  -7   1  136.26    4.59
   1  -7   1  138.45    4.04
   1  -7   1  128.97    4.15
   1  -7   1  137.88    4.47
   1  -7   1  129.01    4.78
   1  -7   1  134.65    4.66
  -2   7  -1   36.13    2.03
  -2   7  -1   37.64    1.71
  -2   7  -1   36.55    1.71
  -2   7  -1   37.29    1.87
  -2   7  -1   35.25    2.23
  -2   7  -1   36.62    2.13
  -2   7  -1   33.62    2.16
   2  -7   1   35.71    2.05
   2  -7   1   34.81    2.02
   2  -7   1   36.46    2.22
   2  -7   1   33.89    2.07
   2  -7   1   37.37    1.92
   2  -7   1   33.63    2.18
   2  -7   1   33.95    1.67
   2  -7   1   35.61    2.13
   2  -7   1   35.11    2.33
   2  -7   1   37.94    2.03
   2  -7   1   36.97    2.12
  -3   7  -1    2.00    0.73
  -3   7  -1    2.00    0.50
  -3   7  -1    1.85    0.56
  -3   7  -1    2.63    0.74
  -3   7  -1    2.69    0.65
  -3   7  -1    2.48    0.56
  -3   7  -1    1.71    0.34
  -3   7  -1    1.48    0.62
  -3   7  -1    2.43    0.71
  -3   7  -1    1.20    0.52
   3  -7   1    1.42    0.48
   3  -7   1    4.04    0.99
   3  -7   1    2.20    0.64
   3  -7   1    2.78    0.68
   3  -7   1    0.26    0.32
   3  -7   1    2.85    0.78
   3  -7   1    1.59    0.54
   3  -7   1    2.07    0.65
   3  -7   1    1.56    0.66
  -4   7  -1   30.08    1.94
  -4   7  -1   28.34    2.00
  -4   7  -1   27.05    1.90
  -4   7  -1   25.29    1.81
  -4   7  -1   25.49    1.78
  -4   7  -1   26.39    1.61
  -4   7  -1   25.88    1.49
  -4   7  -1   24.31    1.68
   4  -7   1   23.03    1.55
   4  -7   1   29.15    1.80
   4  -7   1   25.23    1.53
   4  -7   1   26.29    1.08
   4  -7   1   29.97    1.93
   4  -7   1   26.13    1.85
   4  -7   1   25.75    1.42
   4  -7   1   29.14    1.80
   4  -7   1   27.53    1.84
   4  -7   1   27.30    1.79
  -5   7  -1   51.19    3.11
  -5   7  -1   58.10    2.73
  -5   7  -1   59.82    2.41
  -5   7  -1   59.24    2.50
  -5   7  -1   55.61    2.80
   5  -7   1   62.31    2.68
   5  -7   1   60.33    2.39
   5  -7   1   56.04    2.48
   5  -7   1   56.56    2.26
   5  -7   1   55.92    2.68
   5  -7   1   61.39    2.74
   5  -7   1   60.87    3.08
   5  -7   1   59.85    2.82
  -6   7  -1   92.74    3.42
  -6   7  -1   99.91    3.87
  -6   7  -1   96.16    3.30
   6  -7   1   92.62    2.91
   6  -7   1   93.84    3.15
   6  -7   1   98.57    3.59
   6  -7   1   97.88    3.22
   6  -7   1  100.69    3.74
   6  -7   1   95.23    4.15
   6  -7   1   94.05    3.38
   6  -7   1   97.09    3.05
   6  -7   1   98.12    3.81
  -7   7  -1  132.22    4.19
  -7   7  -1  130.84    4.36
   7  -7   1  127.22    4.50
   7  -7   1  131.86    4.45
   7  -7   1  132.62    3.94
   7  -7   1  127.28    4.11
   7  -7   1  126.96    3.89
   7  -7   1  126.62    4.73
  -8   7  -1  107.62    4.04
  -8   7  -1  104.64    3.81
   8  -7   1  107.07    3.40
   8  -7   1  113.95    3.93
   8  -7   1  101.41    3.50
   8  -7   1  109.84    4.10
  -9   7  -1   33.62    2.32
   9  -7   1   38.05    2.55
   9  -7   1   38.98    2.52
 -10   7  -1   17.23    1.97
  10  -7   1   19.66    2.17
   7   6  -1   37.34    2.78
   7   6  -1   48.51    2.88
  -7  -6   1   48.74    3.00
   6   6  -1   49.62    2.93
   6   6  -1   46.28    2.69
  -6  -6   1   45.98    2.77
   5   6  -1   29.28    2.32
   5   6  -1   29.40    2.05
  -5  -6   1   28.84    2.07
   4   6  -1   19.78    2.09
   4   6  -1   21.48    1.89
   4   6  -1   16.54    1.89
   4   6  -1   24.91    1.57
   4   6  -1   23.42    1.77
   4   6  -1   22.95    1.22
  -4  -6   1   23.56    2.38
  -4  -6   1   23.30    1.79
   3   6  -1    1.80    0.71
   3   6  -1    1.62    0.69
   3   6  -1    2.17    0.57
   3   6  -1    2.65    0.59
   3   6  -1    2.06    0.73
   3   6  -1    2.14    0.72
  -3  -6   1    2.72    0.73
  -3  -6   1    2.05    0.61
  -3  -6   1    2.31    0.72
   2   6  -1    2.14    0.79
   2   6  -1    1.42    0.58
   2   6  -1    2.50    0.57
   2   6  -1    2.13    0.49
   2   6  -1    1.49    0.64
   2   6  -1    1.23    0.58
   2   6  -1    1.36    0.56
   2   6  -1    0.38    0.43
  -2  -6   1    3.29    0.79
  -2  -6   1    3.97    1.05
  -2  -6   1    1.38    0.58
  -2  -6   1    1.20    0.42
  -2  -6   1    1.48    0.60
  -2  -6   1    1.86    0.68
  -2  -6   1    2.11    0.71
  -2  -6   1    0.99    0.55
   1   6  -1    4.08    0.88
   1   6  -1    2.66    0.74
   1   6  -1    4.17    0.85
   1   6  -1    3.94    0.81
   1   6  -1    4.96    0.97
   1   6  -1    3.88    0.76
   1   6  -1    5.04    0.98
   1   6  -1    4.67    0.70
   1   6  -1    3.92    0.59
  -1  -6   1    3.65    0.64
  -1  -6   1    3.41    0.74
  -1  -6   1    4.67    0.86
  -1  -6   1    4.58    0.90
  -1  -6   1    3.49    0.73
  -1  -6   1    4.41    0.94
  -1  -6   1    5.34    1.04
  -1  -6   1    5.55    1.04
   0   6  -1   40.70    1.69
   0   6  -1   37.76    2.23
   0   6  -1   41.31    1.74
   0   6  -1   42.67    1.96
   0   6  -1   40.52    2.31
   0   6  -1   40.01    2.24
   0  -6   1   38.66    2.21
   0  -6   1   40.70    2.03
   0  -6   1   41.47    1.99
   0  -6   1   35.80    2.00
   0  -6   1   42.66    2.24
   0  -6   1   41.24    2.31
   0  -6   1   39.36    1.74
   0  -6   1   40.18    2.41
   0  -6   1   40.01    2.22
  -1   6  -1   75.02    3.03
  -1   6  -1   75.29    3.10
  -1   6  -1   72.89    2.63
  -1   6  -1   72.68    2.45
  -1   6  -1   76.59    3.19
  -1   6  -1   74.32    2.93
  -1   6  -1   75.94    2.51
  -1   6  -1   76.61    3.27
  -1   6  -1   77.83    3.27
   1  -6   1   76.34    2.94
   1  -6   1   79.44    3.24
   1  -6   1   72.41    3.17
   1  -6   1   75.71    2.54
   1  -6   1   79.39    2.93
   1  -6   1   79.46    3.09
   1  -6   1   75.21    2.73
   1  -6   1   66.86    3.24
   1  -6   1   73.74    3.00
   1  -6   1   76.03    2.97
  -2   6  -1   74.63    3.15
  -2   6  -1   82.53    3.20
  -2   6  -1   77.31    3.17
  -2   6  -1   79.25    2.53
  -2   6  -1   76.97    3.02
  -2   6  -1   76.03    2.64
  -2   6  -1   76.59    2.54
  -2   6  -1   76.26    2.93
   2  -6   1   77.82    2.95
   2  -6   1   75.21    2.86
   2  -6   1   83.95    3.20
   2  -6   1   74.02    3.04
   2  -6   1   86.24    3.49
   2  -6   1   75.72    3.16
   2  -6   1   80.76    2.75
   2  -6   1   71.80    2.92
   2  -6   1   80.32    3.07
   2  -6   1   71.72    2.50
   2  -6   1   77.86    2.90
  -3   6  -1  110.42    3.36
  -3   6  -1  113.16    3.81
  -3   6  -1  118.31    4.01
  -3   6  -1  109.77    3.73
  -3   6  -1  112.33    3.40
  -3   6  -1  111.22    2.67
  -3   6  -1  115.67    3.92
  -3   6  -1  107.51    3.22
  -3   6  -1  116.54    3.79
  -3   6  -1  110.64    3.97
  -3   6  -1  103.04    4.03
   3  -6   1  113.67    3.71
   3  -6   1  107.97    3.69
   3  -6   1  110.80    3.92
   3  -6   1  116.17    3.41
   3  -6   1  118.33    3.91
   3  -6   1  116.88    3.81
   3  -6   1  118.97    4.23
   3  -6   1  116.86    3.85
   3  -6   1  112.36    3.32
  -4   6  -1  147.67    4.60
  -4   6  -1  145.74    4.51
  -4   6  -1  140.23    4.28
  -4   6  -1  139.69    4.42
  -4   6  -1  164.47    5.39
  -4   6  -1  144.52    4.56
  -4   6  -1  133.77    4.53
  -4   6  -1  138.45    4.01
  -4   6  -1  131.80    3.82
   4  -6   1  140.98    4.52
   4  -6   1  140.26    4.81
   4  -6   1  142.35    4.42
   4  -6   1  140.00    4.50
   4  -6   1  138.46    3.89
   4  -6   1  140.01    3.94
   4  -6   1  138.06    4.61
   4  -6   1  136.99    4.28
   4  -6   1  147.96    4.22
   4  -6   1  135.11    4.17
  -5   6  -1  100.51    3.60
  -5   6  -1   96.64    3.10
  -5   6  -1   94.77    3.59
  -5   6  -1   96.29    3.63
  -5   6  -1   91.21    3.56
  -5   6  -1  100.00    3.88
  -5   6  -1  103.12    3.27
   5  -6   1   97.53    3.86
   5  -6   1   98.83    2.80
   5  -6   1   97.00    3.41
   5  -6   1  100.90    3.06
   5  -6   1  102.20    3.70
   5  -6   1   96.88    3.53
   5  -6   1   98.25    3.32
   5  -6   1   96.14    3.61
   5  -6   1   99.16    3.07
   5  -6   1   97.41    3.27
  -6   6  -1   71.32    2.66
  -6   6  -1   70.13    3.04
  -6   6  -1   71.67    2.75
   6  -6   1   69.49    3.26
   6  -6   1   70.02    2.63
   6  -6   1   68.10    2.15
   6  -6   1   75.70    3.10
   6  -6   1   68.78    2.26
   6  -6   1   68.94    2.79
   6  -6   1   69.65    3.08
   6  -6   1   68.52    2.45
   6  -6   1   67.75    2.41
   6  -6   1   73.21    2.91
  -7   6  -1   23.95    1.60
  -7   6  -1   28.77    1.80
  -7   6  -1   27.45    1.94
   7  -6   1   25.72    1.36
   7  -6   1   25.58    1.90
   7  -6   1   26.01    1.51
   7  -6   1   27.30    2.08
   7  -6   1   25.34    1.41
   7  -6   1   28.63    1.72
   7  -6   1   26.58    1.44
   7  -6   1   27.08    1.81
   7  -6   1   22.50    1.65
  -8   6  -1   10.59    1.29
  -8   6  -1   11.03    1.39
   8  -6   1    8.35    1.02
   8  -6   1    9.01    0.97
   8  -6   1    7.08    1.11
   8  -6   1    8.40    1.31
   8  -6   1    7.24    1.27
  -9   6  -1    2.07    0.82
   9  -6   1    1.45    0.83
   9  -6   1    2.62    0.89
 -10   6  -1    7.75    1.41
  10  -6   1    6.16    1.35
   7   5  -1    1.79    0.89
   7   5  -1    1.91    0.88
  -7  -5   1    1.02    0.82
   6   5  -1    4.48    1.20
   6   5  -1    4.24    1.00
   6   5  -1    4.42    1.08
  -6  -5   1    3.28    0.90
   5   5  -1   22.09    1.70
   5   5  -1   25.32    1.24
   5   5  -1   23.77    1.57
   5   5  -1   25.67    2.06
   5   5  -1   24.24    1.96
   5   5  -1   25.47    2.10
  -5  -5   1   26.94    1.88
  -5  -5   1   26.53    1.99
   4   5  -1   53.37    2.67
   4   5  -1   52.10    2.73
   4   5  -1   56.58    2.30
   4   5  -1   47.71    1.90
   4   5  -1   49.86    2.77
   4   5  -1   51.79    2.44
  -4  -5   1   53.03    2.68
  -4  -5   1   48.42    2.37
   3   5  -1   94.23    3.65
   3   5  -1  101.34    3.07
   3   5  -1  101.45    3.82
   3   5  -1   99.79    3.20
   3   5  -1  100.14    3.99
   3   5  -1   97.40    3.41
   3   5  -1  103.41    3.87
  -3  -5   1  106.23    3.47
  -3  -5   1  103.76    3.93
  -3  -5   1  108.66    4.16
  -3  -5   1  100.45    3.88
  -3  -5   1   95.50    3.36
  -3  -5   1  105.75    3.84
   2   5  -1  180.68    5.58
   2   5  -1  181.38    4.71
   2   5  -1  185.27    5.00
   2   5  -1  182.81    5.50
   2   5  -1  184.60    4.78
   2   5  -1  184.54    5.49
   2   5  -1  184.23    5.80
  -2  -5   1  182.17    4.97
  -2  -5   1  187.05    5.65
  -2  -5   1  188.46    5.14
  -2  -5   1  181.50    5.50
  -2  -5   1  196.80    5.70
  -2  -5   1  179.66    5.00
  -2  -5   1  178.96    5.41
   1   5  -1  199.92    5.82
   1   5  -1  210.30    5.96
   1   5  -1  201.40    5.07
   1   5  -1  202.40    6.05
   1   5  -1  201.42    4.95
   1   5  -1  199.07    5.87
   1   5  -1  197.30    5.18
   1   5  -1  209.36    6.00
  -1  -5   1  200.06    5.21
  -1  -5   1  200.38    4.97
  -1  -5   1  201.67    5.68
  -1  -5   1  202.79    5.84
  -1  -5   1  196.98    5.85
  -1  -5   1  200.72    5.83
  -1  -5   1  196.33    5.30
  -1  -5   1  202.70    5.83
   0   5  -1  169.28    4.20
   0   5  -1  173.60    4.47
   0   5  -1  159.39    5.04
   0   5  -1  170.58    5.22
   0   5  -1  168.63    4.91
   0   5  -1  162.89    5.11
   0   5  -1  162.35    5.01
   0   5  -1  159.21    5.09
   0   5  -1  167.21    4.34
   0  -5   1  170.18    4.40
   0  -5   1  171.09    4.69
   0  -5   1  170.30    5.17
   0  -5   1  168.56    4.93
   0  -5   1  170.51    5.03
   0  -5   1  169.15    4.51
   0  -5   1  171.49    5.14
   0  -5   1  167.32    4.21
   0  -5   1  172.52    4.85
   0  -5   1  159.06    5.35
   0  -5   1  168.02    5.13
  -1   5  -1  180.69    5.36
  -1   5  -1  181.10    5.19
  -1   5  -1  176.91    4.61
  -1   5  -1  185.09    4.63
  -1   5  -1  185.91    5.37
  -1   5  -1  184.25    5.48
  -1   5  -1  181.45    4.42
  -1   5  -1  188.10    5.51
   1  -5   1  182.19    5.11
   1  -5   1  192.09    4.74
   1  -5   1  183.31    4.65
   1  -5   1  190.00    5.41
   1  -5   1  183.08    4.42
   1  -5   1  171.26    5.34
   1  -5   1  189.67    5.24
   1  -5   1  181.63    5.35
   1  -5   1  182.67    4.91
   1  -5   1  182.66    5.05
   1  -5   1  179.31    5.10
  -2   5  -1   50.07    2.29
  -2   5  -1   57.61    2.39
  -2   5  -1   51.94    1.83
  -2   5  -1   51.45    2.42
  -2   5  -1   52.83    2.22
  -2   5  -1   53.67    2.16
  -2   5  -1   50.66    1.87
   2  -5   1   55.40    2.15
   2  -5   1   54.48    1.85
   2  -5   1   53.72    2.47
   2  -5   1   57.75    2.04
   2  -5   1   55.79    2.24
   2  -5   1   57.76    2.41
   2  -5   1   52.50    2.13
   2  -5   1   49.45    2.15
  -3   5  -1   29.21    1.56
  -3   5  -1   26.35    1.48
  -3   5  -1   28.71    1.48
  -3   5  -1   25.73    1.50
  -3   5  -1   24.65    1.55
  -3   5  -1   27.50    1.30
  -3   5  -1   29.52    1.32
  -3   5  -1   26.20    1.52
  -3   5  -1   27.01    1.46
   3  -5   1   26.02    1.01
   3  -5   1   29.03    1.51
   3  -5   1   26.39    1.38
   3  -5   1   26.14    1.52
   3  -5   1   30.04    1.56
   3  -5   1   26.60    1.23
   3  -5   1   24.29    1.45
   3  -5   1   29.82    1.36
   3  -5   1   27.33    1.64
   3  -5   1   27.79    1.47
   3  -5   1   27.68    1.43
   3  -5   1   25.02    1.21
   3  -5   1   28.95    1.49
  -4   5  -1    0.08    0.20
  -4   5  -1    0.11    0.25
  -4   5  -1   -0.06    0.23
  -4   5  -1    0.32    0.33
  -4   5  -1    0.54    0.35
  -4   5  -1    0.51    0.33
  -4   5  -1    0.15    0.34
  -4   5  -1    0.21    0.28
   4  -5   1   -0.06    0.21
   4  -5   1    0.21    0.33
   4  -5   1    0.13    0.25
   4  -5   1    0.27    0.32
   4  -5   1    0.27    0.35
   4  -5   1    0.53    0.40
   4  -5   1    0.40    0.28
   4  -5   1    0.35    0.37
   4  -5   1    0.29    0.30
  -5   5  -1   46.71    2.08
  -5   5  -1   45.22    2.15
  -5   5  -1   48.42    1.92
  -5   5  -1   47.35    2.23
  -5   5  -1   46.25    1.98
  -5   5  -1   47.15    2.36
  -5   5  -1   47.26    2.19
   5  -5   1   49.83    1.84
   5  -5   1   49.33    2.22
   5  -5   1   47.36    2.35
   5  -5   1   48.07    2.25
   5  -5   1   50.13    2.12
   5  -5   1   47.10    1.76
   5  -5   1   47.91    1.96
   5  -5   1   51.08    2.07
   5  -5   1   45.79    1.61
   5  -5   1   49.15    2.25
   5  -5   1   49.07    1.64
  -6   5  -1   65.33    2.98
  -6   5  -1   65.29    2.54
  -6   5  -1   62.12    2.75
  -6   5  -1   64.15    2.43
   6  -5   1   64.06    2.53
   6  -5   1   65.10    2.40
   6  -5   1   64.96    2.60
   6  -5   1   62.67    2.12
   6  -5   1   68.36    2.85
   6  -5   1   67.47    2.89
   6  -5   1   64.04    2.23
   6  -5   1   63.81    2.09
   6  -5   1   62.64    2.93
   6  -5   1   63.36    1.82
  -7   5  -1   60.20    2.45
  -7   5  -1   55.51    2.50
  -7   5  -1   59.59    2.83
   7  -5   1   55.87    2.20
   7  -5   1   57.66    2.39
   7  -5   1   59.78    2.61
   7  -5   1   61.95    2.08
   7  -5   1   57.33    2.10
   7  -5   1   58.24    2.13
   7  -5   1   60.32    2.89
   7  -5   1   60.65    2.57
   7  -5   1   57.49    2.78
   7  -5   1   59.60    2.98
  -8   5  -1  109.93    3.79
  -8   5  -1  107.21    3.92
   8  -5   1  110.88    3.72
   8  -5   1  114.87    3.34
   8  -5   1  113.37    3.95
   8  -5   1  116.80    4.45
   8  -5   1  119.36    4.01
   8  -5   1  114.09    3.23
  -9   5  -1   92.12    3.67
   9  -5   1   81.22    3.46
 -10   5  -1   51.71    2.91
  10  -5   1   51.93    2.89
   8   4  -1   83.86    3.76
   8   4  -1   83.02    3.79
  -8  -4   1   83.47    3.84
   7   4  -1   94.46    4.23
   7   4  -1   91.65    3.80
   7   4  -1   98.67    3.93
  -7  -4   1   98.14    3.90
   6   4  -1  117.02    4.11
   6   4  -1  116.24    4.82
   6   4  -1  117.59    4.51
   6   4  -1  117.00    3.79
   6   4  -1  113.17    4.12
  -6  -4   1  113.96    4.48
  -6  -4   1  110.22    4.00
   5   4  -1   34.92    1.82
   5   4  -1   34.06    2.20
   5   4  -1   37.96    2.21
   5   4  -1   35.34    2.32
   5   4  -1   38.79    2.07
   5   4  -1   34.39    1.54
  -5  -4   1   34.17    2.12
  -5  -4   1   37.13    2.00
   4   4  -1   18.07    1.49
   4   4  -1   18.07    1.35
   4   4  -1   19.46    1.53
   4   4  -1   19.51    1.54
   4   4  -1   19.76    1.50
   4   4  -1   19.70    1.13
   4   4  -1   19.64    1.61
   4   4  -1   19.67    1.28
  -4  -4   1   20.29    1.50
  -4  -4   1   19.12    1.35
  -4  -4   1   22.36    1.69
  -4  -4   1   17.72    1.49
  -4  -4   1   18.35    1.56
  -4  -4   1   19.42    1.62
  -4  -4   1   18.25    1.34
   3   4  -1   14.33    1.23
   3   4  -1   16.56    1.38
   3   4  -1   14.93    1.25
   3   4  -1   18.08    1.30
   3   4  -1   15.23    0.97
   3   4  -1   17.31    1.21
   3   4  -1   14.52    1.04
  -3  -4   1   15.64    1.36
  -3  -4   1   16.00    1.14
  -3  -4   1   14.13    1.25
  -3  -4   1   13.33    1.15
  -3  -4   1   14.98    1.10
   2   4  -1    7.91    1.04
   2   4  -1    3.85    0.71
   2   4  -1    7.64    1.05
   2   4  -1    7.72    0.84
   2   4  -1    6.09    0.70
   2   4  -1    7.48    1.06
   2   4  -1    8.53    1.03
   2   4  -1    7.63    0.87
  -2  -4   1    5.71    0.78
  -2  -4   1    6.85    0.85
  -2  -4   1    6.64    0.94
  -2  -4   1    6.46    0.92
  -2  -4   1    5.16    0.73
  -2  -4   1    5.86    0.87
  -2  -4   1    6.23    0.77
  -2  -4   1    7.54    0.80
  -2  -4   1    6.99    0.95
   1   4  -1   18.33    1.11
   1   4  -1   21.22    1.37
   1   4  -1   22.32    1.51
   1   4  -1   17.66    1.25
   1   4  -1   17.05    1.18
   1   4  -1   19.76    1.02
   1   4  -1   16.27    1.16
   1   4  -1   20.19    1.32
   1   4  -1   19.11    1.03
  -1  -4   1   19.29    1.04
  -1  -4   1   17.25    1.22
  -1  -4   1   18.36    1.26
  -1  -4   1   18.76    1.03
  -1  -4   1   18.32    1.16
  -1  -4   1   20.34    1.32
  -1  -4   1   17.70    1.23
  -1  -4   1   18.33    1.14
  -1  -4   1   18.42    1.21
   0   4  -1   11.86    0.98
   0   4  -1   13.46    0.98
   0   4  -1   13.09    0.78
   0   4  -1   12.90    1.04
   0   4  -1   11.09    0.83
   0   4  -1   12.08    1.05
   0   4  -1   11.44    1.03
   0   4  -1   10.87    0.76
   0   4  -1   12.53    1.01
   0  -4   1   12.56    0.78
   0  -4   1   12.33    1.05
   0  -4   1   12.03    0.92
   0  -4   1   11.44    1.03
   0  -4   1   17.51    1.43
   0  -4   1   11.55    0.98
   0  -4   1   11.29    0.86
  -1   4  -1   66.22    2.52
  -1   4  -1   58.98    2.43
  -1   4  -1   66.96    2.37
  -1   4  -1   68.27    2.10
  -1   4  -1   67.45    2.32
  -1   4  -1   69.73    2.48
  -1   4  -1   64.79    2.08
  -1   4  -1   63.07    1.95
  -1   4  -1   65.69    2.45
  -1   4  -1   64.73    2.02
  -1   4  -1   67.32    2.68
   1  -4   1   62.86    2.58
   1  -4   1   65.40    2.44
   1  -4   1   66.45    1.96
   1  -4   1   66.00    2.01
   1  -4   1   66.07    2.27
   1  -4   1   67.65    2.29
   1  -4   1   66.62    2.12
   1  -4   1   65.13    2.30
   1  -4   1   66.63    2.51
   1  -4   1   69.56    2.40
   1  -4   1   62.86    2.33
  -2   4  -1   15.49    1.04
  -2   4  -1   14.51    0.95
  -2   4  -1   15.35    0.85
  -2   4  -1   14.53    0.99
  -2   4  -1   16.53    0.90
  -2   4  -1   15.31    1.01
  -2   4  -1   15.58    1.08
  -2   4  -1   17.14    1.02
  -2   4  -1   14.91    0.83
  -2   4  -1   16.98    1.03
  -2   4  -1   15.19    0.83
   2  -4   1   14.95    1.08
   2  -4   1   15.58    1.01
   2  -4   1   15.94    1.16
   2  -4   1   13.92    0.94
   2  -4   1   16.47    0.90
   2  -4   1   14.83    1.00
   2  -4   1   14.64    0.94
   2  -4   1   15.55    0.99
   2  -4   1   15.88    1.03
   2  -4   1   14.07    0.79
   2  -4   1   15.60    0.95
  -3   4  -1   23.95    1.27
  -3   4  -1   24.10    1.14
  -3   4  -1   23.96    1.11
  -3   4  -1   21.25    1.19
  -3   4  -1   21.62    1.29
  -3   4  -1   23.14    1.26
  -3   4  -1   22.37    1.24
  -3   4  -1   22.38    1.00
   3  -4   1   24.74    1.39
   3  -4   1   22.77    1.16
   3  -4   1   23.40    1.42
   3  -4   1   24.18    1.22
   3  -4   1   24.30    1.06
   3  -4   1   22.49    1.22
   3  -4   1   24.15    1.16
   3  -4   1   23.67    1.06
   3  -4   1   22.69    1.04
   3  -4   1   23.86    1.28
   3  -4   1   23.74    1.24
   3  -4   1   22.82    1.27
  -4   4  -1  116.39    3.51
  -4   4  -1  114.39    3.49
  -4   4  -1  117.22    3.16
  -4   4  -1  114.72    3.07
  -4   4  -1  108.92    3.43
  -4   4  -1  108.97    3.25
  -4   4  -1  109.96    2.90
  -4   4  -1  112.94    3.49
   4  -4   1  115.16    3.08
   4  -4   1  112.32    2.87
   4  -4   1  111.05    2.75
   4  -4   1  113.32    3.16
   4  -4   1  110.36    3.25
   4  -4   1  111.84    2.95
   4  -4   1  110.12    3.44
   4  -4   1  110.96    3.67
   4  -4   1  107.35    3.15
   4  -4   1  114.22    3.52
   4  -4   1  113.62    2.89
  -5   4  -1   99.21    3.32
  -5   4  -1   99.81    3.37
  -5   4  -1  103.04    3.20
  -5   4  -1  103.52    3.45
  -5   4  -1  103.11    2.99
  -5   4  -1  100.53    2.41
  -5   4  -1  104.65    3.11
  -5   4  -1  108.72    3.27
   5  -4   1  101.78    3.03
   5  -4   1  104.64    3.46
   5  -4   1  103.36    3.40
   5  -4   1  104.11    2.53
   5  -4   1  103.07    2.90
   5  -4   1  105.09    3.19
   5  -4   1  103.43    2.71
   5  -4   1  100.59    2.28
   5  -4   1   98.41    3.03
   5  -4   1  102.72    3.61
   5  -4   1   84.67    3.25
   5  -4   1   97.63    2.66
  -6   4  -1  110.23    4.01
  -6   4  -1  108.38    3.94
  -6   4  -1  106.64    3.92
  -6   4  -1  110.70    3.43
  -6   4  -1  107.04    3.26
  -6   4  -1  109.50    3.55
  -6   4  -1  110.45    3.79
   6  -4   1  105.15    3.19
   6  -4   1  104.85    3.45
   6  -4   1  112.08    4.00
   6  -4   1  110.55    3.10
   6  -4   1  102.31    3.31
   6  -4   1  108.57    2.86
   6  -4   1  107.81    2.69
   6  -4   1  110.07    3.76
   6  -4   1  114.56    3.28
   6  -4   1  110.83    3.84
   6  -4   1  107.77    3.03
   6  -4   1  109.85    3.82
  -7   4  -1   40.41    2.26
  -7   4  -1   40.87    1.96
  -7   4  -1   42.77    2.11
   7  -4   1   38.30    2.32
   7  -4   1   41.42    2.05
   7  -4   1   45.58    1.84
   7  -4   1   44.08    2.37
   7  -4   1   42.61    1.64
   7  -4   1   40.81    1.53
   7  -4   1   44.06    2.10
   7  -4   1   46.00    2.39
   7  -4   1   40.80    1.70
   7  -4   1   41.09    1.91
  -8   4  -1   23.16    1.87
  -8   4  -1   22.37    1.58
  -8   4  -1   22.74    1.68
   8  -4   1   26.10    2.07
   8  -4   1   25.31    1.59
   8  -4   1   22.75    1.68
   8  -4   1   25.59    1.96
  -9   4  -1    9.85    1.37
  -9   4  -1   12.64    1.61
   9  -4   1   11.67    1.49
   9  -4   1   11.40    1.66
 -10   4  -1    2.17    0.94
  10  -4   1    0.18    0.77
   8   3  -1   31.38    2.16
   8   3  -1   38.00    2.45
  -8  -3   1   34.54    2.36
   7   3  -1   12.17    1.50
   7   3  -1   11.87    1.42
   7   3  -1   11.13    1.67
  -7  -3   1   11.67    1.43
   6   3  -1    0.27    0.48
   6   3  -1   -0.20    0.44
   6   3  -1    0.28    0.54
   6   3  -1    0.18    0.32
   6   3  -1   -0.65    0.41
   6   3  -1    0.52    0.55
   6   3  -1    0.02    0.36
  -6  -3   1    0.28    0.49
  -6  -3   1    0.71    0.50
   5   3  -1    7.66    0.85
   5   3  -1    6.75    1.07
   5   3  -1    8.67    1.29
   5   3  -1    7.65    1.03
   5   3  -1    7.70    1.06
   5   3  -1    6.82    1.12
   5   3  -1    7.04    0.93
   5   3  -1    6.87    1.10
  -5  -3   1    7.54    1.16
  -5  -3   1    6.79    1.01
  -5  -3   1    6.36    1.20
  -5  -3   1    5.46    0.85
   4   3  -1   62.30    2.25
   4   3  -1   61.23    2.76
   4   3  -1   59.13    2.57
   4   3  -1   62.09    2.16
   4   3  -1   57.29    2.56
   4   3  -1   63.61    2.63
   4   3  -1   60.14    2.36
   4   3  -1   65.93    2.61
  -4  -3   1   58.46    2.35
  -4  -3   1   63.65    2.67
  -4  -3   1   63.52    2.33
  -4  -3   1   58.49    2.69
  -4  -3   1   58.79    2.61
  -4  -3   1   59.78    2.50
   3   3  -1  281.59    6.76
   3   3  -1  292.09    7.75
   3   3  -1  291.17    7.29
   3   3  -1  283.48    6.65
   3   3  -1  292.79    7.42
   3   3  -1  289.56    7.31
   3   3  -1  295.04    6.52
   3   3  -1  283.86    6.26
  -3  -3   1  279.89    6.97
  -3  -3   1  295.44    7.29
  -3  -3   1  280.48    6.52
  -3  -3   1  290.24    7.38
  -3  -3   1  284.10    6.55
  -3  -3   1  284.44    7.67
  -3  -3   1  286.54    7.36
  -3  -3   1  297.01    7.43
   2   3  -1  437.69   10.79
   2   3  -1  413.50   10.28
   2   3  -1  449.27    9.19
   2   3  -1  427.86    9.30
   2   3  -1  432.60   10.23
   2   3  -1  442.97   10.15
   2   3  -1  441.40   10.29
   2   3  -1  442.25    9.79
  -2  -3   1  439.76    9.89
  -2  -3   1  435.59    9.19
  -2  -3   1  458.33   10.40
  -2  -3   1  456.73   10.24
  -2  -3   1  449.56   10.36
  -2  -3   1  438.22   10.79
  -2  -3   1  451.92    9.27
  -2  -3   1  455.59   10.37
  -2  -3   1  459.01   10.24
   1   3  -1  521.42   11.48
   1   3  -1  505.25   11.48
   1   3  -1  506.35   10.18
   1   3  -1  464.40   11.37
   1   3  -1  506.11   10.35
   1   3  -1  586.83   12.40
   1   3  -1  517.20   10.50
   1   3  -1  476.00   11.41
   1   3  -1  508.59   10.92
   1   3  -1  511.09   11.38
  -1  -3   1  503.96   11.40
  -1  -3   1  506.40   10.18
  -1  -3   1  516.82   11.43
  -1  -3   1  488.22   10.46
  -1  -3   1  511.99   10.33
  -1  -3   1  493.57   11.96
  -1  -3   1  498.32   11.47
  -1  -3   1  505.05   10.75
  -1  -3   1  495.56   11.46
   0   3  -1  278.98    6.49
   0   3  -1  267.00    6.05
   0   3  -1  269.40    6.77
   0   3  -1  267.50    5.89
   0   3  -1  266.03    6.52
   0   3  -1  269.67    5.84
   0   3  -1  273.86    5.71
   0   3  -1  267.63    6.61
   0   3  -1  278.28    6.66
   0   3  -1  271.66    6.67
   0  -3   1  272.36    5.67
   0  -3   1  272.64    6.64
   0  -3   1  255.82    6.54
   0  -3   1  270.41    6.74
   0  -3   1  261.97    6.01
   0  -3   1  269.43    6.05
   0  -3   1  268.31    6.46
   0  -3   1  265.12    6.51
   0  -3   1  267.78    6.60
   0  -3   1  263.91    6.45
  -1   3  -1  225.61    4.97
  -1   3  -1  226.39    4.86
  -1   3  -1  219.53    5.69
  -1   3  -1  235.93    5.57
  -1   3  -1  236.13    5.19
  -1   3  -1  228.04    5.76
  -1   3  -1  227.70    5.52
  -1   3  -1  240.86    5.43
  -1   3  -1  225.19    5.20
  -1   3  -1  227.55    5.61
  -1   3  -1  224.93    5.48
  -1   3  -1  226.80    5.66
  -1   3  -1  221.90    4.98
   1  -3   1  223.67    5.11
   1  -3   1  234.86    5.55
   1  -3   1  238.04    5.51
   1  -3   1  225.36    5.64
   1  -3   1  231.15    5.62
   1  -3   1  234.18    5.97
   1  -3   1  221.57    5.49
   1  -3   1  240.03    5.79
   1  -3   1  230.13    5.02
   1  -3   1  234.38    4.87
   1  -3   1  234.01    4.99
   1  -3   1  219.03    5.31
  -2   3  -1  124.56    3.11
  -2   3  -1  124.29    3.00
  -2   3  -1  125.05    3.35
  -2   3  -1  126.19    3.33
  -2   3  -1  122.47    3.35
  -2   3  -1  121.32    3.51
  -2   3  -1  125.40    3.34
  -2   3  -1  123.90    2.91
  -2   3  -1  129.66    3.18
  -2   3  -1  122.45    2.92
   2  -3   1  119.29    3.27
   2  -3   1  121.65    2.93
   2  -3   1  123.66    3.32
   2  -3   1  127.19    3.55
   2  -3   1  121.80    3.37
   2  -3   1  125.48    3.33
   2  -3   1  127.47    2.91
   2  -3   1  125.66    3.17
   2  -3   1  126.25    2.91
   2  -3   1  120.96    3.05
   2  -3   1  123.92    3.04
   2  -3   1  121.13    3.15
  -3   3  -1    2.22    0.38
  -3   3  -1    3.68    0.44
  -3   3  -1    2.33    0.41
  -3   3  -1    3.12    0.48
  -3   3  -1    3.21    0.44
  -3   3  -1    3.28    0.25
  -3   3  -1    2.74    0.43
  -3   3  -1    2.77    0.50
  -3   3  -1    3.66    0.56
  -3   3  -1    3.83    0.51
  -3   3  -1    2.94    0.52
  -3   3  -1    3.91    0.56
  -3   3  -1    3.24    0.38
   3  -3   1    2.88    0.48
   3  -3   1    2.55    0.43
   3  -3   1    3.18    0.39
   3  -3   1    2.27    0.43
   3  -3   1    4.53    0.54
   3  -3   1    3.97    0.33
   3  -3   1    2.98    0.38
   3  -3   1    2.92    0.39
   3  -3   1    3.68    0.56
   3  -3   1    4.06    0.58
   3  -3   1    4.23    0.50
   3  -3   1    2.51    0.45
   3  -3   1    3.10    0.42
   3  -3   1    3.75    0.53
  -4   3  -1    8.87    0.91
  -4   3  -1    9.31    0.74
  -4   3  -1    8.63    0.70
  -4   3  -1    8.43    0.67
  -4   3  -1   10.09    0.89
  -4   3  -1    9.09    0.76
  -4   3  -1    8.73    0.81
  -4   3  -1    7.66    0.82
  -4   3  -1    9.11    0.62
  -4   3  -1    8.91    0.90
   4  -3   1    7.94    0.49
   4  -3   1    8.16    0.64
   4  -3   1    9.82    0.64
   4  -3   1   10.13    0.86
   4  -3   1    9.83    0.77
   4  -3   1    9.35    0.81
   4  -3   1    9.33    0.82
   4  -3   1    9.49    0.73
   4  -3   1    9.04    0.81
   4  -3   1    9.37    0.56
   4  -3   1    9.58    0.58
   4  -3   1    8.00    0.87
   4  -3   1    9.17    0.45
   4  -3   1   10.02    0.66
  -5   3  -1   12.10    1.01
  -5   3  -1   12.03    0.96
  -5   3  -1   14.19    0.97
  -5   3  -1   12.07    0.93
  -5   3  -1   11.78    0.99
  -5   3  -1   12.93    1.10
  -5   3  -1   12.24    0.93
  -5   3  -1   11.52    0.86
   5  -3   1   12.75    0.92
   5  -3   1   11.87    0.86
   5  -3   1   10.34    0.76
   5  -3   1   10.80    1.01
   5  -3   1   11.93    0.67
   5  -3   1   12.02    1.02
   5  -3   1   10.71    0.73
   5  -3   1   12.84    1.05
   5  -3   1   11.50    0.66
   5  -3   1   11.45    1.02
   5  -3   1   11.24    0.90
   5  -3   1   12.11    0.76
   5  -3   1   13.47    1.05
  -6   3  -1   64.86    2.66
  -6   3  -1   63.35    2.31
  -6   3  -1   64.93    2.42
  -6   3  -1   60.05    2.60
  -6   3  -1   60.02    2.40
  -6   3  -1   70.44    2.93
  -6   3  -1   64.75    2.57
   6  -3   1   61.90    2.66
   6  -3   1   62.90    2.68
   6  -3   1   64.35    2.38
   6  -3   1   64.85    1.87
   6  -3   1   67.82    2.31
   6  -3   1   62.74    2.61
   6  -3   1   62.68    2.05
   6  -3   1   65.02    2.13
   6  -3   1   64.19    2.03
   6  -3   1   68.99    2.84
   6  -3   1   61.46    2.33
   6  -3   1   65.52    2.20
   6  -3   1   65.39    2.68
  -7   3  -1   75.49    2.74
  -7   3  -1   71.44    3.11
  -7   3  -1   76.57    2.87
   7  -3   1   75.86    3.32
   7  -3   1   73.64    2.29
   7  -3   1   77.23    2.25
   7  -3   1   77.38    2.54
   7  -3   1   74.76    3.19
   7  -3   1   75.90    2.64
   7  -3   1   76.71    2.56
   7  -3   1   73.59    2.62
   7  -3   1   77.35    2.84
   7  -3   1   75.74    3.16
   7  -3   1   75.90    2.15
  -8   3  -1   70.49    2.91
  -8   3  -1   66.07    3.13
  -8   3  -1   62.24    2.62
   8  -3   1   61.03    2.55
   8  -3   1   58.66    3.11
   8  -3   1   62.81    3.05
   8  -3   1   65.83    2.78
  -9   3  -1   45.16    2.51
   9  -3   1   42.19    2.73
   9  -3   1   42.79    2.40
 -10   3  -1   27.83    2.16
  10  -3   1   25.84    2.37
   9   2  -1   20.73    2.25
  -9  -2   1   21.88    2.30
   8   2  -1   67.99    3.17
   8   2  -1   66.06    2.90
  -8  -2   1   63.66    3.07
   7   2  -1   67.84    3.45
   7   2  -1   66.21    2.70
   7   2  -1   69.42    3.25
   7   2  -1   70.10    2.29
   7   2  -1   66.92    2.80
   7   2  -1   70.51    3.03
  -7  -2   1   65.18    3.18
  -7  -2   1   71.73    3.01
   6   2  -1  111.68    3.56
   6   2  -1  110.84    4.08
   6   2  -1  105.12    3.62
   6   2  -1  105.72    4.20
   6   2  -1  108.74    3.45
   6   2  -1  103.02    3.19
   6   2  -1  107.39    3.95
  -6  -2   1  110.89    3.63
  -6  -2   1  104.08    3.92
   5   2  -1  175.98    5.28
   5   2  -1  176.00    4.75
   5   2  -1  180.32    5.59
   5   2  -1  175.66    4.62
   5   2  -1  181.25    5.27
   5   2  -1  182.53    4.85
   5   2  -1  173.30    4.61
   5   2  -1  172.81    5.26
   5   2  -1  174.64    5.32
  -5  -2   1  178.13    5.61
  -5  -2   1  178.27    5.34
  -5  -2   1  169.67    4.70
  -5  -2   1  173.28    5.32
  -5  -2   1  172.21    4.99
  -5  -2   1  180.75    5.28
   4   2  -1   81.33    2.57
   4   2  -1   86.23    3.16
   4   2  -1   87.74    3.05
   4   2  -1   81.61    2.69
   4   2  -1   81.69    2.89
   4   2  -1   86.90    3.00
   4   2  -1   84.26    2.60
  -4  -2   1   84.67    2.80
  -4  -2   1   86.92    3.06
  -4  -2   1   77.42    2.61
  -4  -2   1   83.06    2.99
  -4  -2   1   79.94    2.88
  -4  -2   1   79.58    3.09
  -4  -2   1   82.53    2.63
   3   2  -1   60.18    1.99
   3   2  -1   61.81    1.85
   3   2  -1   57.97    2.22
   3   2  -1   62.00    2.08
   3   2  -1   62.42    2.39
   3   2  -1   60.60    2.04
   3   2  -1   60.94    2.28
   3   2  -1   59.96    1.97
   3   2  -1   57.64    2.15
   3   2  -1   65.68    2.29
  -3  -2   1   63.15    2.40
  -3  -2   1   62.57    2.00
  -3  -2   1   58.34    2.24
  -3  -2   1   59.85    2.07
  -3  -2   1   59.78    1.98
  -3  -2   1   58.91    2.19
  -3  -2   1   61.67    2.21
  -3  -2   1   60.56    2.26
   2   2  -1   32.63    1.28
   2   2  -1   32.93    1.29
   2   2  -1   32.30    1.38
   2   2  -1   32.90    1.24
   2   2  -1   30.97    1.31
   2   2  -1   30.44    1.37
   2   2  -1   34.05    1.38
   2   2  -1   32.60    1.25
   2   2  -1   33.01    1.50
  -2  -2   1   32.83    1.42
  -2  -2   1   33.17    1.24
  -2  -2   1   36.01    1.41
  -2  -2   1   32.42    1.42
  -2  -2   1   32.36    1.37
  -2  -2   1   33.62    1.30
  -2  -2   1   31.25    1.21
   1   2  -1   12.23    0.69
   1   2  -1   11.69    0.78
   1   2  -1   13.16    0.66
   1   2  -1   12.03    0.75
   1   2  -1   12.37    0.77
   1   2  -1   12.67    0.66
   1   2  -1   13.55    0.74
   1   2  -1   11.57    0.63
   1   2  -1   13.93    0.73
   1   2  -1   12.58    0.72
   1   2  -1   13.44    0.77
  -1  -2   1   13.12    0.74
  -1  -2   1   11.71    0.64
  -1  -2   1   12.31    0.66
  -1  -2   1   12.14    0.76
  -1  -2   1   12.18    0.77
  -1  -2   1   12.13    0.71
  -1  -2   1   12.85    0.75
  -1  -2   1   12.09    0.77
  -1  -2   1   11.64    0.70
   0   2  -1    0.82    0.28
   0   2  -1    0.62    0.20
   0   2  -1    0.38    0.24
   0   2  -1    0.90    0.25
   0   2  -1    0.59    0.23
   0   2  -1    1.03    0.32
   0   2  -1    0.64    0.29
   0   2  -1    0.41    0.22
   0   2  -1    0.78    0.24
   0   2  -1    0.54    0.26
   0  -2   1    0.30    0.21
   0  -2   1    0.48    0.18
   0  -2   1    1.66    0.39
   0  -2   1    1.46    0.33
   0  -2   1    0.49    0.24
   0  -2   1    0.57    0.30
   0  -2   1    0.26    0.16
   0  -2   1    0.49    0.20
   0  -2   1    0.36    0.20
   0  -2   1    0.88    0.29
   0  -2   1    0.63    0.23
  -1   2  -1   85.90    2.06
  -1   2  -1   83.79    2.26
  -1   2  -1   83.33    2.00
  -1   2  -1   85.01    2.27
  -1   2  -1   87.53    2.31
  -1   2  -1   86.04    2.30
  -1   2  -1   89.29    2.09
  -1   2  -1   88.07    2.31
  -1   2  -1   83.39    2.02
  -1   2  -1   86.30    2.12
  -1   2  -1   84.86    2.41
  -1   2  -1   87.69    2.17
   1  -2   1   84.87    1.99
   1  -2   1   88.20    2.19
   1  -2   1   88.69    2.05
   1  -2   1   84.68    2.36
   1  -2   1   85.74    2.05
   1  -2   1   86.72    2.29
   1  -2   1   87.23    2.11
   1  -2   1   87.33    2.26
   1  -2   1   89.90    2.33
   1  -2   1   86.09    2.08
   1  -2   1   83.46    2.28
  -2   2  -1  256.75    5.25
  -2   2  -1  248.87    5.78
  -2   2  -1  257.89    5.24
  -2   2  -1  253.56    5.17
  -2   2  -1  251.09    5.44
  -2   2  -1  251.69    5.77
  -2   2  -1  255.10    6.08
  -2   2  -1  253.80    5.78
  -2   2  -1  249.03    5.28
  -2   2  -1  254.10    5.82
  -2   2  -1  258.17    5.08
  -2   2  -1  258.24    5.61
  -2   2  -1  260.06    5.58
   2  -2   1  255.84    5.80
   2  -2   1  254.15    5.44
   2  -2   1  254.87    5.76
   2  -2   1  249.22    5.07
   2  -2   1  254.61    6.07
   2  -2   1  251.94    5.85
   2  -2   1  252.30    5.23
   2  -2   1  261.14    5.82
   2  -2   1  249.40    5.83
   2  -2   1  248.31    5.33
   2  -2   1  253.80    5.51
   2  -2   1  255.06    5.13
   2  -2   1  250.60    5.54
   2  -2   1  255.26    5.21
   2  -2   1  251.58    5.09
  -3   2  -1   96.46    2.56
  -3   2  -1   97.85    2.75
  -3   2  -1   94.77    2.45
  -3   2  -1   97.09    2.58
  -3   2  -1   96.43    2.20
  -3   2  -1   97.70    2.91
  -3   2  -1   95.47    2.39
  -3   2  -1   96.07    2.75
  -3   2  -1   94.22    2.37
  -3   2  -1   98.84    2.72
  -3   2  -1   96.75    2.74
   3  -2   1   93.80    2.17
   3  -2   1   95.75    2.26
   3  -2   1   96.93    2.88
   3  -2   1   94.59    2.54
   3  -2   1   98.40    2.40
   3  -2   1   94.12    2.67
   3  -2   1   91.17    2.27
   3  -2   1   97.41    2.33
   3  -2   1   97.33    2.48
   3  -2   1   93.69    2.39
   3  -2   1   94.13    2.44
   3  -2   1  103.59    2.81
   3  -2   1   99.44    2.78
   3  -2   1   97.97    2.42
   3  -2   1   95.97    2.73
   3  -2   1   99.03    2.77
   3  -2   1   93.80    2.25
  -4   2  -1  108.64    2.53
  -4   2  -1  106.59    3.16
  -4   2  -1  107.15    2.69
  -4   2  -1  105.10    3.14
  -4   2  -1  103.99    2.54
  -4   2  -1  106.38    2.76
  -4   2  -1  106.51    2.95
  -4   2  -1  107.28    2.97
  -4   2  -1  105.37    3.10
  -4   2  -1  104.49    2.83
  -4   2  -1  101.13    3.29
   4  -2   1  108.55    3.33
   4  -2   1  110.69    2.84
   4  -2   1  106.97    3.14
   4  -2   1  103.99    2.69
   4  -2   1  105.37    2.83
   4  -2   1  106.62    2.43
   4  -2   1   98.35    2.86
   4  -2   1  100.01    2.74
   4  -2   1  101.69    2.70
   4  -2   1  104.27    3.15
   4  -2   1  105.17    3.18
   4  -2   1  105.04    2.70
   4  -2   1  104.60    2.72
   4  -2   1  105.15    2.72
   4  -2   1  105.34    2.63
   4  -2   1  105.68    3.17
  -5   2  -1   80.38    2.79
  -5   2  -1   78.00    2.42
  -5   2  -1   80.67    2.07
  -5   2  -1   77.40    2.58
  -5   2  -1   78.18    2.58
  -5   2  -1   81.39    2.54
  -5   2  -1   84.38    3.00
  -5   2  -1   74.72    2.67
  -5   2  -1   76.76    2.76
  -5   2  -1   82.28    2.24
   5  -2   1   78.19    2.92
   5  -2   1   81.18    2.79
   5  -2   1   77.22    2.29
   5  -2   1   80.69    2.42
   5  -2   1   80.38    2.81
   5  -2   1   82.39    2.24
   5  -2   1   77.50    2.33
   5  -2   1   72.27    2.21
   5  -2   1   81.21    2.40
   5  -2   1   75.70    2.45
   5  -2   1   79.98    2.82
   5  -2   1   76.71    2.38
   5  -2   1   81.25    2.81
   5  -2   1   82.21    2.85
  -6   2  -1   81.95    3.23
  -6   2  -1   79.82    2.83
  -6   2  -1   80.52    3.04
  -6   2  -1   78.31    2.14
  -6   2  -1   82.24    2.65
  -6   2  -1   75.43    2.69
  -6   2  -1   77.89    3.01
   6  -2   1   82.30    2.66
   6  -2   1   79.23    3.04
   6  -2   1   82.17    3.20
   6  -2   1   77.70    2.62
   6  -2   1   77.67    3.03
   6  -2   1   76.50    3.01
   6  -2   1   83.48    3.06
   6  -2   1   81.37    2.72
   6  -2   1   79.16    2.56
   6  -2   1   81.02    2.26
   6  -2   1   81.95    2.35
   6  -2   1   79.64    2.52
  -7   2  -1   66.94    2.53
  -7   2  -1   66.23    2.64
  -7   2  -1   67.24    2.95
   7  -2   1   66.24    2.54
   7  -2   1   65.85    2.42
   7  -2   1   67.69    2.41
   7  -2   1   70.06    3.11
   7  -2   1   66.41    2.61
   7  -2   1   65.53    2.90
   7  -2   1   64.55    2.94
   7  -2   1   66.27    1.93
  -8   2  -1   42.68    2.15
  -8   2  -1   40.65    2.44
  -8   2  -1   43.19    2.26
   8  -2   1   42.41    2.53
   8  -2   1   40.11    2.51
   8  -2   1   41.78    1.97
   8  -2   1   38.98    2.07
   8  -2   1   44.18    2.54
   8  -2   1   41.74    2.18
  -9   2  -1    2.52    0.84
   9  -2   1    2.75    0.85
   9  -2   1    1.60    0.84
 -10   2  -1   -0.11    0.64
   9   1  -1   73.87    3.44
  -9  -1   1   67.69    3.37
   8   1  -1   47.20    2.30
   8   1  -1   45.31    2.52
   8   1  -1   51.05    2.93
  -8  -1   1   51.79    2.62
   7   1  -1   46.87    2.16
   7   1  -1   46.13    2.08
   7   1  -1   44.36    1.71
   7   1  -1   41.88    1.78
   7   1  -1   46.61    2.30
   7   1  -1   43.74    2.46
   7   1  -1   42.65    2.50
   7   1  -1   47.50    2.69
  -7  -1   1   42.01    2.44
  -7  -1   1   41.18    2.22
   6   1  -1   17.82    1.83
   6   1  -1   15.24    1.19
   6   1  -1   14.82    1.12
   6   1  -1   16.14    1.43
   6   1  -1   17.15    1.33
   6   1  -1   15.69    1.37
   6   1  -1   16.99    1.10
  -6  -1   1   16.20    1.37
  -6  -1   1   16.36    1.25
  -6  -1   1   16.25    1.29
   5   1  -1   20.35    1.40
   5   1  -1   19.50    1.35
   5   1  -1   13.84    1.24
   5   1  -1   15.82    1.04
   5   1  -1   16.63    1.28
   5   1  -1   17.97    1.13
   5   1  -1   15.85    1.16
   5   1  -1   18.59    1.31
   5   1  -1   16.56    1.04
  -5  -1   1   18.21    1.33
  -5  -1   1   16.41    1.17
  -5  -1   1   15.54    1.13
  -5  -1   1   16.93    1.34
  -5  -1   1   19.77    1.21
  -5  -1   1   18.18    1.32
  -5  -1   1   18.66    1.30
   4   1  -1  108.82    2.88
   4   1  -1  113.63    3.66
   4   1  -1  106.42    3.01
   4   1  -1  109.85    3.41
   4   1  -1  111.13    3.44
   4   1  -1  120.45    3.57
   4   1  -1  110.18    3.13
   4   1  -1  113.48    3.07
   4   1  -1  109.99    3.14
   4   1  -1  109.43    3.39
  -4  -1   1  111.96    3.10
  -4  -1   1  111.80    3.30
  -4  -1   1  118.16    3.54
  -4  -1   1  115.55    3.69
  -4  -1   1  108.02    3.40
  -4  -1   1  112.80    3.50
  -4  -1   1  106.50    3.03
  -4  -1   1  108.42    3.41
   3   1  -1  240.37    5.72
   3   1  -1  224.26    5.38
   3   1  -1  227.81    4.94
   3   1  -1  235.93    5.68
   3   1  -1  225.06    5.73
   3   1  -1  233.21    5.17
   3   1  -1  222.50    5.47
   3   1  -1  230.33    5.09
   3   1  -1  228.18    5.95
   3   1  -1  232.89    5.62
  -3  -1   1  231.61    5.65
  -3  -1   1  233.26    5.98
  -3  -1   1  226.53    5.39
  -3  -1   1  223.59    5.45
  -3  -1   1  224.03    5.06
  -3  -1   1  232.00    5.70
  -3  -1   1  228.44    5.10
  -3  -1   1  236.04    5.67
  -3  -1   1  218.64    5.65
   2   1  -1  369.02    8.33
   2   1  -1  381.59    8.24
   2   1  -1  364.46    8.36
   2   1  -1  366.43    8.66
   2   1  -1  367.05    7.50
   2   1  -1  369.29    8.28
   2   1  -1  358.33    7.89
   2   1  -1  374.73    7.45
   2   1  -1  368.53    7.34
   2   1  -1  381.86    8.28
   2   1  -1  373.79    8.05
  -2  -1   1  372.94    8.67
  -2  -1   1  356.04    8.27
  -2  -1   1  367.68    7.43
  -2  -1   1  363.55    8.26
  -2  -1   1  373.25    8.08
  -2  -1   1  371.44    8.25
  -2  -1   1  378.16    7.89
  -2  -1   1  371.79    8.25
  -2  -1   1  371.35    7.46
   1   1  -1  435.75    9.37
   1   1  -1  436.07    9.49
   1   1  -1  439.29    9.34
   1   1  -1  436.24    9.17
   1   1  -1  437.35    8.89
   1   1  -1  448.15    9.38
   1   1  -1  432.06    9.79
   1   1  -1  446.85    8.51
   1   1  -1  427.81    9.32
   1   1  -1  433.45    9.45
  -1  -1   1  436.79    9.17
  -1  -1   1  453.25    9.36
  -1  -1   1  420.98    9.33
  -1  -1   1  444.13    9.37
  -1  -1   1  428.22    8.46
  -1  -1   1  422.32    8.86
  -1  -1   1  435.55    9.44
  -1  -1   1  446.65    8.44
  -1  -1   1  438.11    9.38
  -1  -1   1  443.01    8.49
   0   1  -1  440.25    9.56
   0   1  -1  413.02    9.34
   0   1  -1  439.53    8.38
   0   1  -1  448.01    9.18
   0   1  -1  433.33    8.39
   0   1  -1  431.33    8.29
   0   1  -1  421.75    9.22
   0   1  -1  438.56    8.21
   0   1  -1  450.19    8.93
   0   1  -1  426.51    9.19
   0   1  -1  432.33    9.15
   0   1  -1  449.95    8.57
   0  -1   1  442.18    8.56
   0  -1   1  434.11    8.20
   0  -1   1  425.10    9.55
   0  -1   1  418.00    9.33
   0  -1   1  435.80    8.40
   0  -1   1  445.89    8.92
   0  -1   1  430.94    8.38
   0  -1   1  444.01    8.28
   0  -1   1  433.73    9.17
   0  -1   1  441.77    9.15
  -1   1  -1  299.35    5.79
  -1   1  -1  296.27    6.10
  -1   1  -1  308.24    5.73
  -1   1  -1  299.49    6.20
  -1   1  -1  293.87    5.97
  -1   1  -1  296.22    5.78
  -1   1  -1  307.65    6.46
  -1   1  -1  292.64    6.38
  -1   1  -1  305.09    6.08
  -1   1  -1  301.26    6.02
  -1   1  -1  297.97    5.74
  -1   1  -1  303.01    6.22
  -1   1  -1  309.21    6.39
  -1   1  -1  316.30    6.70
  -1   1  -1  291.43    6.43
  -1   1  -1  295.65    6.38
   1  -1   1  300.83    6.00
   1  -1   1  301.35    6.38
   1  -1   1  311.80    6.69
   1  -1   1  299.93    6.16
   1  -1   1  292.92    6.15
   1  -1   1  300.43    5.78
   1  -1   1  306.52    5.72
   1  -1   1  305.78    5.79
   1  -1   1  295.44    6.07
   1  -1   1  276.62    6.09
   1  -1   1  301.04    6.39
   1  -1   1  308.43    6.40
   1  -1   1  298.61    5.74
   1  -1   1  299.07    6.47
  -2   1  -1   56.36    1.32
  -2   1  -1   54.81    1.48
  -2   1  -1   54.39    1.58
  -2   1  -1   56.74    1.40
  -2   1  -1   55.38    1.38
  -2   1  -1   56.94    1.45
  -2   1  -1   54.33    1.60
  -2   1  -1   53.58    1.43
  -2   1  -1   55.64    1.46
  -2   1  -1   53.83    1.60
  -2   1  -1   56.94    1.46
  -2   1  -1   56.05    1.50
  -2   1  -1   53.91    1.58
  -2   1  -1   57.19    1.71
   2  -1   1   57.49    1.40
   2  -1   1   55.11    1.62
   2  -1   1   55.28    1.48
   2  -1   1   50.91    1.36
   2  -1   1   56.35    1.37
   2  -1   1   53.44    1.55
   2  -1   1   57.84    1.38
   2  -1   1   57.22    1.69
   2  -1   1   57.83    1.63
   2  -1   1   55.65    1.46
   2  -1   1   52.62    1.45
   2  -1   1   56.60    1.36
   2  -1   1   54.19    1.43
   2  -1   1   56.05    1.41
   2  -1   1   55.57    1.60
   2  -1   1   55.02    1.38
  -3   1  -1   20.60    0.85
  -3   1  -1   21.36    0.93
  -3   1  -1   22.07    0.82
  -3   1  -1   21.88    0.91
  -3   1  -1   22.48    0.89
  -3   1  -1   22.28    1.00
  -3   1  -1   21.23    0.77
  -3   1  -1   20.61    0.98
  -3   1  -1   22.73    1.08
  -3   1  -1   22.02    0.91
  -3   1  -1   19.56    0.83
  -3   1  -1   21.36    1.01
  -3   1  -1   21.09    1.01
   3  -1   1   20.86    0.79
   3  -1   1   21.26    0.87
   3  -1   1   20.91    1.05
   3  -1   1   21.18    1.01
   3  -1   1   21.08    0.90
   3  -1   1   21.40    0.80
   3  -1   1   18.71    0.92
   3  -1   1   19.76    0.99
   3  -1   1   21.68    1.00
   3  -1   1   22.79    0.88
   3  -1   1   22.64    0.77
   3  -1   1   21.50    1.00
   3  -1   1   21.16    0.99
   3  -1   1   21.96    0.88
  -4   1  -1   -0.03    0.22
  -4   1  -1    0.35    0.21
  -4   1  -1    0.07    0.19
  -4   1  -1    0.49    0.27
  -4   1  -1    0.41    0.27
  -4   1  -1   -0.12    0.22
  -4   1  -1   -0.12    0.20
  -4   1  -1    0.43    0.26
  -4   1  -1    0.11    0.15
  -4   1  -1    0.27    0.22
  -4   1  -1    0.34    0.23
   4  -1   1   -0.15    0.18
   4  -1   1    0.05    0.17
   4  -1   1    0.28    0.25
   4  -1   1    0.51    0.29
   4  -1   1   -0.03    0.22
   4  -1   1    0.04    0.26
   4  -1   1    0.34    0.26
   4  -1   1    0.09    0.15
   4  -1   1    0.13    0.25
   4  -1   1    0.12    0.23
   4  -1   1    0.43    0.25
   4  -1   1    0.16    0.18
   4  -1   1    0.32    0.23
  -5   1  -1   25.83    1.32
  -5   1  -1   27.60    1.49
  -5   1  -1   27.02    1.06
  -5   1  -1   24.12    1.35
  -5   1  -1   23.56    1.38
  -5   1  -1   24.71    1.28
  -5   1  -1   27.63    1.39
  -5   1  -1   26.23    1.54
  -5   1  -1   25.24    1.23
   5  -1   1   23.48    1.39
   5  -1   1   26.74    0.99
   5  -1   1   24.14    1.25
   5  -1   1   26.70    1.24
   5  -1   1   24.47    1.19
   5  -1   1   27.46    1.47
   5  -1   1   25.82    1.03
   5  -1   1   24.59    1.10
   5  -1   1   26.69    1.46
   5  -1   1   27.27    1.50
   5  -1   1   25.67    1.47
   5  -1   1   26.78    1.53
  -6   1  -1   37.31    1.97
  -6   1  -1   38.31    1.42
  -6   1  -1   41.45    1.92
  -6   1  -1   40.70    2.18
  -6   1  -1   41.43    1.78
  -6   1  -1   36.24    1.78
   6  -1   1   42.25    2.11
   6  -1   1   40.59    2.07
   6  -1   1   39.12    2.02
   6  -1   1   41.02    1.82
   6  -1   1   37.97    1.68
   6  -1   1   39.11    2.10
   6  -1   1   42.79    2.09
   6  -1   1   41.65    1.71
  -7   1  -1   32.78    1.99
  -7   1  -1   32.29    1.84
  -7   1  -1   31.79    1.70
   7  -1   1   32.06    1.83
   7  -1   1   30.29    2.00
   7  -1   1   27.18    1.54
   7  -1   1   32.11    1.78
   7  -1   1   32.05    2.01
   7  -1   1   29.53    1.99
   7  -1   1   31.96    1.60
  -8   1  -1   27.60    1.74
  -8   1  -1   32.64    2.19
  -8   1  -1   25.15    1.80
   8  -1   1   31.97    1.95
   8  -1   1   28.52    2.23
   8  -1   1   30.21    1.73
   8  -1   1   29.90    2.12
   8  -1   1   28.13    2.16
   8  -1   1   26.77    1.85
  -9   1  -1   58.22    2.91
   9  -1   1   47.51    2.97
   9  -1   1   58.05    2.79
   9  -1   1   54.92    2.83
 -10   1  -1   39.75    2.61
   9   0  -1    9.01    1.40
  -9   0   1   11.11    1.55
   8   0  -1   24.77    1.83
   8   0  -1   25.09    1.69
   8   0  -1   22.05    1.47
   8   0  -1   25.14    2.03
   8   0  -1   24.90    1.29
  -8   0   1   21.91    1.73
   7   0  -1   80.12    3.53
   7   0  -1   77.69    3.29
   7   0  -1   75.72    2.65
   7   0  -1   77.30    3.34
   7   0  -1   73.34    2.92
   7   0  -1   75.50    2.61
   7   0  -1   78.98    2.85
   7   0  -1   74.12    2.45
  -7   0   1   70.60    3.19
  -7   0   1   76.36    2.97
   6   0  -1  137.25    4.69
   6   0  -1  133.17    3.99
   6   0  -1  140.14    3.76
   6   0  -1  134.66    4.44
   6   0  -1  142.49    3.95
   6   0  -1  143.94    4.56
   6   0  -1  134.39    4.27
   6   0  -1  131.64    3.88
   6   0  -1  139.28    4.45
  -6   0   1  138.61    4.03
  -6   0   1  136.13    3.40
  -6   0   1  140.76    4.49
  -6   0   1  136.68    4.23
   5   0  -1  236.28    5.48
   5   0  -1  232.36    6.28
   5   0  -1  240.90    6.37
   5   0  -1  236.89    5.61
   5   0  -1  239.30    6.65
   5   0  -1  243.32    6.10
   5   0  -1  244.84    6.38
   5   0  -1  239.40    5.73
   5   0  -1  234.71    5.88
  -5   0   1  237.39    5.56
  -5   0   1  236.13    6.35
  -5   0   1  233.78    6.34
  -5   0   1  242.25    5.98
  -5   0   1  234.29    6.06
  -5   0   1  237.63    6.67
  -5   0   1  236.83    6.31
  -5   0   1  243.12    5.72
   4   0  -1  234.10    5.95
   4   0  -1  246.25    6.03
   4   0  -1  235.20    5.39
   4   0  -1  240.36    5.32
   4   0  -1  238.87    5.18
   4   0  -1  225.51    5.93
   4   0  -1  245.55    6.30
   4   0  -1  234.22    5.65
   4   0  -1  227.95    5.20
   4   0  -1  232.32    5.67
   4   0  -1  222.10    5.92
  -4   0   1  233.74    5.31
  -4   0   1  233.38    5.36
  -4   0   1  223.31    5.87
  -4   0   1  240.58    5.63
  -4   0   1  231.07    5.99
  -4   0   1  236.01    6.00
  -4   0   1  234.10    5.74
  -4   0   1  235.25    5.96
  -4   0   1  242.68    5.28
   3   0  -1   76.61    2.37
   3   0  -1   76.62    2.12
   3   0  -1   79.17    2.42
   3   0  -1   75.36    2.50
   3   0  -1   79.24    2.07
   3   0  -1   80.24    2.19
   3   0  -1   79.66    2.32
   3   0  -1   81.76    2.39
   3   0  -1   75.99    2.23
   3   0  -1   76.13    2.00
  -3   0   1   76.88    2.38
  -3   0   1   77.68    2.52
  -3   0   1   78.03    2.40
  -3   0   1   82.63    2.46
  -3   0   1   80.21    2.29
  -3   0   1   80.72    2.16
  -3   0   1   78.71    2.26
  -3   0   1   78.66    2.09
  -3   0   1   79.78    2.23
  -3   0   1   77.95    2.41
   2   0  -1   60.43    1.78
   2   0  -1   60.92    1.58
   2   0  -1   59.17    1.78
   2   0  -1   58.53    1.68
   2   0  -1   59.43    1.79
   2   0  -1   59.98    1.78
   2   0  -1   58.12    1.57
   2   0  -1   59.04    1.67
   2   0  -1   60.33    1.77
   2   0  -1   59.55    1.60
   2   0  -1   61.02    1.55
   2   0  -1   60.26    1.75
   2   0  -1   59.26    1.86
  -2   0   1   60.30    1.69
  -2   0   1   59.52    1.59
  -2   0   1   61.33    1.89
  -2   0   1   59.45    1.65
  -2   0   1   62.76    1.57
  -2   0   1   59.91    1.77
  -2   0   1   60.97    1.77
  -2   0   1   61.58    1.77
  -2   0   1   59.04    1.67
  -2   0   1   60.09    1.58
   1   0  -1    0.51    0.13
   1   0  -1    0.50    0.12
   1   0  -1    0.41    0.14
   1   0  -1    0.51    0.15
   1   0  -1    0.47    0.13
   1   0  -1    0.16    0.11
   1   0  -1    0.43    0.13
   1   0  -1    0.61    0.20
   1   0  -1    0.49    0.15
   1   0  -1    0.32    0.13
   1   0  -1    0.31    0.12
   1   0  -1    0.46    0.15
  -1   0   1    0.51    0.15
  -1   0   1    0.26    0.13
  -1   0   1    0.63    0.16
  -1   0   1    0.36    0.14
  -1   0   1    0.54    0.14
  -1   0   1    0.34    0.12
  -1   0   1    0.65    0.16
  -1   0   1    0.02    0.11
  -1   0   1    0.39    0.13
  -1   0   1    0.15    0.11
  -1   0  -1   13.24    0.48
  -1   0  -1   13.56    0.44
  -1   0  -1   12.67    0.50
  -1   0  -1   13.29    0.51
  -1   0  -1   13.20    0.44
  -1   0  -1   12.49    0.48
  -1   0  -1   13.25    0.38
  -1   0  -1   12.98    0.42
  -1   0  -1   12.69    0.48
  -1   0  -1   12.90    0.47
  -1   0  -1   12.98    0.42
  -1   0  -1   12.48    0.38
   1   0   1   13.48    0.39
   1   0   1   12.43    0.48
   1   0   1   12.60    0.48
   1   0   1   13.24    0.44
   1   0   1   12.67    0.35
   1   0   1   13.17    0.41
   1   0   1   13.04    0.46
   1   0   1   13.16    0.49
   1   0   1   13.10    0.54
   1   0   1   12.28    0.37
   1   0   1   13.82    0.52
   1   0   1   13.15    0.46
  -2   0  -1  102.61    2.63
  -2   0  -1  101.46    2.35
  -2   0  -1  100.10    2.63
  -2   0  -1  101.32    2.34
  -2   0  -1   98.81    2.59
  -2   0  -1  103.41    2.38
  -2   0  -1  101.49    2.76
  -2   0  -1  107.37    2.30
  -2   0  -1  104.34    2.50
  -2   0  -1  105.77    2.48
  -2   0  -1  107.00    2.63
  -2   0  -1  105.20    2.49
   2   0   1  101.22    2.37
   2   0   1  101.00    2.62
   2   0   1  106.73    2.65
   2   0   1  103.87    2.23
   2   0   1  102.92    2.57
   2   0   1   99.05    2.47
   2   0   1  104.99    2.32
   2   0   1  103.75    2.32
   2   0   1  105.97    2.24
   2   0   1  106.72    2.66
   2   0   1  100.60    2.74
   2   0   1  107.42    2.63
  -3   0  -1  128.84    3.28
  -3   0  -1  125.96    3.43
  -3   0  -1  131.22    3.65
  -3   0  -1  137.34    3.51
  -3   0  -1  125.35    3.42
  -3   0  -1  135.09    3.52
  -3   0  -1  132.89    3.27
  -3   0  -1  132.88    3.04
  -3   0  -1  129.79    3.10
  -3   0  -1  128.99    3.09
   3   0   1  132.80    2.92
   3   0   1  132.57    3.47
   3   0   1  125.83    3.18
   3   0   1  130.72    3.48
   3   0   1  130.77    3.51
   3   0   1  128.35    3.44
   3   0   1  131.57    2.93
   3   0   1  131.81    3.14
   3   0   1  131.44    3.04
   3   0   1  131.40    3.64
   3   0   1  128.48    3.00
   3   0   1  131.87    2.96
   3   0   1  137.74    3.52
  -4   0  -1  163.30    4.25
  -4   0  -1  171.79    4.37
  -4   0  -1  173.51    4.08
  -4   0  -1  167.88    4.21
  -4   0  -1  175.44    4.58
  -4   0  -1  163.23    4.50
  -4   0  -1  163.75    4.06
  -4   0  -1  164.15    3.96
  -4   0  -1  167.20    4.57
  -4   0  -1  168.38    4.78
   4   0   1  172.02    4.12
   4   0   1  167.51    4.16
   4   0   1  171.39    4.57
   4   0   1  165.68    4.73
   4   0   1  170.20    4.61
   4   0   1  165.81    4.55
   4   0   1  169.71    3.79
   4   0   1  172.39    3.83
   4   0   1  168.54    3.83
   4   0   1  178.48    4.59
   4   0   1  167.85    3.88
   4   0   1  170.46    3.98
   4   0   1  176.09    4.58
  -5   0  -1   97.63    3.04
  -5   0  -1   93.00    2.76
  -5   0  -1   92.73    2.66
  -5   0  -1   88.06    3.11
  -5   0  -1   94.93    3.21
  -5   0  -1   92.34    2.84
  -5   0  -1   94.90    3.37
  -5   0  -1  101.50    3.10
  -5   0  -1   95.71    2.89
   5   0   1   91.55    2.55
   5   0   1   95.19    2.53
   5   0   1   91.86    3.16
   5   0   1   91.08    3.20
   5   0   1   93.25    3.21
   5   0   1   93.42    2.87
   5   0   1   94.99    3.37
   5   0   1   99.64    3.26
   5   0   1   98.77    3.27
   5   0   1  101.73    2.78
   5   0   1   96.06    2.89
  -6   0  -1   87.53    3.16
  -6   0  -1   94.02    2.76
  -6   0  -1   90.82    3.73
  -6   0  -1   92.95    3.09
  -6   0  -1   92.73    3.41
  -6   0  -1   93.30    2.97
   6   0   1   97.42    3.11
   6   0   1   89.90    3.42
   6   0   1   99.88    3.67
   6   0   1   98.27    3.50
   6   0   1   93.02    2.86
   6   0   1   95.00    3.06
   6   0   1   90.81    3.36
  -7   0  -1   50.31    2.62
  -7   0  -1   55.56    2.48
   7   0   1   59.39    2.92
   7   0   1   60.11    2.24
   7   0   1   54.97    2.70
   7   0   1   53.89    2.34
   7   0   1   57.86    2.46
   7   0   1   57.27    2.81
  -8   0  -1   31.04    1.98
  -8   0  -1   30.65    2.18
   8   0   1   27.25    1.77
   8   0   1   28.11    2.18
   8   0   1   26.77    1.97
   8   0   1   29.08    1.91
   8   0   1   29.72    2.15
  -9   0  -1   14.23    1.77
   9   0   1   13.02    1.81
   9   0   1   11.71    1.68
   9   0   1   17.02    1.85
  10  -1  -1   35.95    2.50
 -10   1   1   34.30    2.46
   9  -1  -1   56.47    2.84
  -9   1   1   56.35    2.89
   8  -1  -1   82.10    3.08
   8  -1  -1   81.25    3.26
   8  -1  -1   78.20    3.54
   8  -1  -1   84.96    2.66
   8  -1  -1   80.11    2.81
   8  -1  -1   79.03    2.75
  -8   1   1   83.03    3.29
   7  -1  -1   77.26    2.92
   7  -1  -1   74.96    2.46
   7  -1  -1   73.83    3.23
   7  -1  -1   74.08    3.01
   7  -1  -1   72.84    2.72
   7  -1  -1   76.58    2.50
   7  -1  -1   72.29    3.12
   7  -1  -1   76.83    3.40
   7  -1  -1   68.98    2.57
  -7   1   1   75.55    2.89
  -7   1   1   76.35    2.78
  -7   1   1   71.73    3.13
   6  -1  -1   26.19    1.75
   6  -1  -1   25.32    1.67
   6  -1  -1   27.00    1.52
   6  -1  -1   27.19    1.69
   6  -1  -1   27.67    1.68
   6  -1  -1   25.70    1.39
   6  -1  -1   26.25    1.42
   6  -1  -1   26.17    1.57
   6  -1  -1   26.49    1.66
   6  -1  -1   26.73    1.23
  -6   1   1   29.02    1.55
  -6   1   1   27.98    1.56
  -6   1   1   25.99    1.65
  -6   1   1   24.31    1.39
  -6   1   1   25.94    1.75
  -6   1   1   27.74    1.65
  -6   1   1   27.19    0.92
  -6   1   1   28.23    1.73
   5  -1  -1    0.67    0.35
   5  -1  -1    0.64    0.38
   5  -1  -1    0.75    0.36
   5  -1  -1    0.45    0.33
   5  -1  -1    1.51    0.48
   5  -1  -1    1.34    0.44
   5  -1  -1    1.19    0.47
   5  -1  -1    1.19    0.48
   5  -1  -1    1.96    0.57
   5  -1  -1    1.06    0.32
  -5   1   1    0.99    0.45
  -5   1   1    1.10    0.40
  -5   1   1    1.11    0.20
  -5   1   1    0.89    0.38
  -5   1   1    0.60    0.35
  -5   1   1    1.83    0.55
  -5   1   1    0.75    0.36
  -5   1   1    1.10    0.44
  -5   1   1    0.46    0.30
   4  -1  -1   25.70    1.28
   4  -1  -1   22.06    1.12
   4  -1  -1   24.52    1.16
   4  -1  -1   23.22    1.14
   4  -1  -1   23.32    1.27
   4  -1  -1   21.68    1.01
   4  -1  -1   23.21    0.90
   4  -1  -1   22.05    1.29
   4  -1  -1   23.80    1.14
   4  -1  -1   24.05    1.29
   4  -1  -1   22.64    1.20
  -4   1   1   23.93    1.25
  -4   1   1   24.96    1.30
  -4   1   1   23.61    1.17
  -4   1   1   22.95    1.06
  -4   1   1   22.00    1.29
  -4   1   1   23.90    1.17
  -4   1   1   24.92    1.29
  -4   1   1   23.30    1.24
  -4   1   1   24.32    1.08
  -4   1   1   24.13    1.14
  -4   1   1   23.17    0.68
   3  -1  -1   58.84    1.49
   3  -1  -1   62.24    1.97
   3  -1  -1   60.14    1.94
   3  -1  -1   60.18    1.98
   3  -1  -1   61.78    1.77
   3  -1  -1   61.92    1.86
   3  -1  -1   60.50    2.09
   3  -1  -1   62.97    1.88
   3  -1  -1   61.01    1.69
   3  -1  -1   60.57    1.79
   3  -1  -1   60.81    1.78
   3  -1  -1   59.93    1.98
   3  -1  -1   56.09    1.94
  -3   1   1   58.23    1.94
  -3   1   1   60.64    1.99
  -3   1   1   61.04    2.10
  -3   1   1   57.83    1.97
  -3   1   1   61.03    1.87
  -3   1   1   59.06    1.76
  -3   1   1   59.05    1.72
  -3   1   1   60.06    1.71
  -3   1   1   58.43    1.95
  -3   1   1   61.63    1.86
   2  -1  -1  302.89    6.05
   2  -1  -1  307.66    6.70
   2  -1  -1  294.62    6.70
   2  -1  -1  298.31    6.67
   2  -1  -1  293.33    6.63
   2  -1  -1  298.86    6.52
   2  -1  -1  293.08    6.99
   2  -1  -1  295.26    5.83
   2  -1  -1  304.07    6.76
   2  -1  -1  294.98    6.18
   2  -1  -1  299.53    5.94
   2  -1  -1  297.46    6.29
  -2   1   1  297.10    5.82
  -2   1   1  300.73    6.04
  -2   1   1  291.23    6.98
  -2   1   1  309.45    6.69
  -2   1   1  303.89    6.15
  -2   1   1  299.92    5.95
  -2   1   1  300.78    6.69
  -2   1   1  299.74    6.53
  -2   1   1  300.19    6.29
  -2   1   1  292.08    6.01
  -2   1   1  300.59    6.71
  -2   1   1  290.76    6.64
   1  -1  -1  959.34   20.32
   1  -1  -1  975.49   18.12
   1  -1  -1  998.50   20.51
   1  -1  -1  966.76   18.32
   1  -1  -1  978.77   18.01
   1  -1  -1  962.62   19.97
   1  -1  -1  952.32   19.98
   1  -1  -1  952.29   20.92
   1  -1  -1  976.79   18.17
   1  -1  -1  952.70   19.31
   1  -1  -1  944.90   19.97
  -1   1   1  947.08   18.15
  -1   1   1  992.40   20.77
  -1   1   1  979.12   20.26
  -1   1   1  968.60   18.12
  -1   1   1  976.09   19.98
  -1   1   1 1000.00   18.23
  -1   1   1  983.01   19.32
  -1   1   1  933.33   20.91
   0  -1  -1  550.91   10.39
   0  -1  -1  538.92   11.58
   0  -1  -1  550.40   10.50
   0  -1  -1  548.54   10.56
   0  -1  -1  558.03   11.62
   0  -1  -1  547.61   12.00
   0  -1  -1  551.46   10.91
   0  -1  -1  551.43   11.56
   0  -1  -1  535.20   11.58
   0  -1  -1  568.56   10.28
   0  -1  -1  558.32   11.26
   0  -1  -1  537.33   11.48
   0  -1  -1  549.41   11.48
   0   1   1  543.00   11.59
   0   1   1  545.25   10.92
   0   1   1  562.85   10.46
   0   1   1  561.08   11.27
   0   1   1  562.52   10.25
   0   1   1  568.97   11.47
   0   1   1  557.94   11.59
   0   1   1  538.99   11.54
   0   1   1  555.96   10.38
   0   1   1  547.68   10.56
   0   1   1  561.69   11.68
   0   1   1  525.55   11.50
  -1  -1  -1  261.68    5.81
  -1  -1  -1  267.83    5.92
  -1  -1  -1  264.80    5.40
  -1  -1  -1  270.17    5.59
  -1  -1  -1  268.02    5.38
  -1  -1  -1  267.34    5.83
  -1  -1  -1  265.39    5.91
  -1  -1  -1  261.10    5.95
  -1  -1  -1  257.90    5.26
  -1  -1  -1  264.97    5.27
  -1  -1  -1  267.80    6.20
   1   1   1  264.17    6.19
   1   1   1  263.54    5.90
   1   1   1  268.01    5.23
   1   1   1  260.50    5.18
   1   1   1  263.27    5.11
   1   1   1  268.03    5.38
   1   1   1  271.60    5.87
   1   1   1  269.49    5.87
   1   1   1  271.86    5.79
   1   1   1  264.75    5.34
   1   1   1  267.29    5.92
  -2  -1  -1  197.59    4.30
  -2  -1  -1  202.57    4.21
  -2  -1  -1  207.12    5.09
  -2  -1  -1  200.18    4.76
  -2  -1  -1  204.32    4.88
  -2  -1  -1  204.29    4.35
  -2  -1  -1  202.52    4.68
  -2  -1  -1  201.76    4.38
  -2  -1  -1  201.94    4.59
  -2  -1  -1  201.62    4.35
  -2  -1  -1  206.78    4.85
  -2  -1  -1  207.38    4.78
   2   1   1  198.51    4.82
   2   1   1  198.67    4.38
   2   1   1  205.22    4.25
   2   1   1  195.45    4.78
   2   1   1  204.44    4.81
   2   1   1  201.45    4.24
   2   1   1  204.67    4.86
   2   1   1  204.51    4.72
   2   1   1  205.10    5.10
   2   1   1  199.13    4.10
   2   1   1  199.03    4.34
   2   1   1  200.01    4.55
  -3  -1  -1   26.25    1.30
  -3  -1  -1   24.25    1.06
  -3  -1  -1   26.11    1.03
  -3  -1  -1   25.19    1.22
  -3  -1  -1   27.29    1.23
  -3  -1  -1   25.40    1.11
  -3  -1  -1   28.31    1.30
  -3  -1  -1   27.46    1.13
  -3  -1  -1   26.05    1.26
   3   1   1   26.38    1.32
   3   1   1   25.65    1.24
   3   1   1   25.69    1.03
   3   1   1   26.43    0.93
   3   1   1   26.65    1.14
   3   1   1   25.38    1.19
   3   1   1   23.69    1.21
   3   1   1   25.87    1.25
   3   1   1   25.47    1.04
   3   1   1   24.04    1.21
   3   1   1   25.78    1.18
  -4  -1  -1    0.90    0.35
  -4  -1  -1    0.31    0.30
  -4  -1  -1    0.52    0.30
  -4  -1  -1    0.93    0.36
  -4  -1  -1    0.71    0.34
  -4  -1  -1    0.75    0.33
  -4  -1  -1    0.98    0.35
   4   1   1    0.76    0.33
   4   1   1    0.90    0.35
   4   1   1    0.97    0.38
   4   1   1    0.53    0.34
   4   1   1    0.83    0.26
   4   1   1    0.37    0.32
   4   1   1    0.74    0.37
   4   1   1    1.10    0.32
   4   1   1    1.34    0.35
   4   1   1    1.11    0.39
   4   1   1    0.82    0.36
  -5  -1  -1    7.75    1.01
  -5  -1  -1   10.53    1.25
  -5  -1  -1    7.18    0.85
  -5  -1  -1    9.82    1.15
  -5  -1  -1    8.79    1.01
  -5  -1  -1    5.91    0.93
   5   1   1   10.07    0.91
   5   1   1    8.57    1.06
   5   1   1    6.69    0.83
   5   1   1    9.05    0.97
   5   1   1    8.76    1.06
   5   1   1    9.63    1.13
   5   1   1    7.74    1.00
   5   1   1    7.92    1.04
   5   1   1    8.36    0.84
   5   1   1    9.64    1.11
  -6  -1  -1   33.41    1.83
  -6  -1  -1   33.77    1.95
  -6  -1  -1   33.70    1.77
   6   1   1   34.11    1.95
   6   1   1   32.30    1.95
   6   1   1   31.85    1.53
   6   1   1   31.74    2.01
   6   1   1   32.91    1.77
   6   1   1   31.87    1.73
   6   1   1   32.59    1.98
  -7  -1  -1   38.55    2.32
  -7  -1  -1   44.51    2.21
   7   1   1   40.48    2.37
   7   1   1   39.01    2.11
   7   1   1   43.54    2.50
   7   1   1   40.26    2.47
   7   1   1   39.75    2.09
  -8  -1  -1   35.19    2.21
   8   1   1   41.10    2.57
   8   1   1   34.38    2.15
   8   1   1   37.20    2.47
   8   1   1   37.84    2.17
   8   1   1   33.86    2.50
  -9  -1  -1   43.69    2.64
   9   1   1   40.60    2.79
   9   1   1   40.35    2.95
  10  -2  -1    1.54    0.92
 -10   2   1    1.22    0.83
   9  -2  -1    0.03    0.61
   9  -2  -1    0.39    0.42
   9  -2  -1    0.51    0.43
  -9   2   1   -0.39    0.58
   8  -2  -1   12.43    1.43
   8  -2  -1   16.46    1.66
   8  -2  -1   14.53    1.06
   8  -2  -1   11.18    1.18
   8  -2  -1   15.24    1.49
   8  -2  -1   14.96    1.75
  -8   2   1   13.54    1.50
  -8   2   1   14.43    1.38
   7  -2  -1   50.34    2.27
   7  -2  -1   49.56    1.81
   7  -2  -1   46.48    2.08
   7  -2  -1   46.83    2.44
   7  -2  -1   48.00    2.60
   7  -2  -1   51.55    2.59
   7  -2  -1   48.83    2.27
   7  -2  -1   51.15    2.20
   7  -2  -1   50.32    1.96
  -7   2   1   48.10    2.13
  -7   2   1   47.69    2.47
  -7   2   1   49.10    2.27
   6  -2  -1   63.13    2.64
   6  -2  -1   61.33    2.77
   6  -2  -1   61.61    2.36
   6  -2  -1   59.65    2.28
   6  -2  -1   59.96    2.15
   6  -2  -1   63.70    1.94
   6  -2  -1   61.00    2.37
   6  -2  -1   57.53    2.52
   6  -2  -1   63.35    2.31
   6  -2  -1   59.75    2.63
   6  -2  -1   56.40    2.55
  -6   2   1   60.70    2.35
  -6   2   1   64.49    2.47
  -6   2   1   60.64    2.58
  -6   2   1   62.00    2.62
  -6   2   1   63.06    2.79
  -6   2   1   58.99    2.21
  -6   2   1   62.81    2.67
   5  -2  -1  120.67    3.97
   5  -2  -1  126.02    3.47
   5  -2  -1  116.62    3.36
   5  -2  -1  118.17    3.39
   5  -2  -1  118.81    2.92
   5  -2  -1  124.49    3.83
   5  -2  -1  123.82    3.36
   5  -2  -1  118.07    3.30
   5  -2  -1  115.75    3.47
   5  -2  -1  121.46    3.49
   5  -2  -1  120.76    3.78
   5  -2  -1  124.01    3.77
  -5   2   1  116.78    3.72
  -5   2   1  121.20    3.53
  -5   2   1  117.56    3.73
  -5   2   1  119.57    3.27
  -5   2   1  122.20    3.77
  -5   2   1  120.34    3.38
  -5   2   1  121.20    3.79
  -5   2   1  122.14    3.58
   4  -2  -1  211.42    4.82
   4  -2  -1  204.36    5.01
   4  -2  -1  213.10    5.40
   4  -2  -1  198.62    5.58
   4  -2  -1  202.19    4.40
   4  -2  -1  207.60    5.11
   4  -2  -1  207.99    4.66
   4  -2  -1  206.14    4.82
   4  -2  -1  202.41    5.35
   4  -2  -1  207.82    5.28
   4  -2  -1  201.11    5.30
  -4   2   1  205.12    4.37
  -4   2   1  202.71    5.28
  -4   2   1  205.68    5.33
  -4   2   1  209.31    5.03
  -4   2   1  207.51    4.70
  -4   2   1  207.15    4.70
  -4   2   1  208.76    5.37
  -4   2   1  203.55    5.36
  -4   2   1  206.29    4.81
   3  -2  -1  242.17    6.00
   3  -2  -1  258.95    6.06
   3  -2  -1  255.18    6.08
   3  -2  -1  258.28    6.38
   3  -2  -1  247.27    5.46
   3  -2  -1  257.00    5.49
   3  -2  -1  261.32    6.01
   3  -2  -1  250.43    5.69
   3  -2  -1  247.43    5.85
   3  -2  -1  247.96    5.32
  -3   2   1  247.38    6.33
  -3   2   1  249.05    5.99
  -3   2   1  250.04    5.86
  -3   2   1  249.77    5.09
  -3   2   1  251.82    5.45
  -3   2   1  248.37    6.02
  -3   2   1  263.78    5.37
  -3   2   1  251.34    6.05
  -3   2   1  246.02    6.09
  -3   2   1  253.92    5.69
   2  -2  -1  574.35   12.38
   2  -2  -1  577.85   12.64
   2  -2  -1  585.87   12.75
   2  -2  -1  588.68   11.24
   2  -2  -1  578.20   13.14
   2  -2  -1  589.87   12.55
   2  -2  -1  587.18   11.40
   2  -2  -1  587.39   12.51
   2  -2  -1  591.06   11.38
   2  -2  -1  561.29   12.50
   2  -2  -1  574.55   11.39
   2  -2  -1  577.52   11.87
  -2   2   1  580.65   11.22
  -2   2   1  585.10   12.76
  -2   2   1  596.56   12.55
  -2   2   1  580.50   12.55
  -2   2   1  591.40   11.88
  -2   2   1  592.55   11.42
  -2   2   1  581.88   12.65
  -2   2   1  579.18   12.50
  -2   2   1  574.44   11.33
   1  -2  -1  138.61    3.59
   1  -2  -1  143.55    3.19
   1  -2  -1  135.05    3.32
   1  -2  -1  137.07    3.01
   1  -2  -1  131.76    3.46
   1  -2  -1  139.89    2.96
   1  -2  -1  139.71    3.16
   1  -2  -1  139.19    3.35
   1  -2  -1  139.16    3.65
   1  -2  -1  138.36    3.10
   1  -2  -1  138.59    3.05
   1  -2  -1  131.04    3.33
   1  -2  -1  140.55    3.43
   1  -2  -1  139.03    3.34
  -1   2   1  138.00    3.43
  -1   2   1  139.00    3.49
  -1   2   1  135.05    3.55
  -1   2   1  133.22    3.64
  -1   2   1  137.98    3.32
  -1   2   1  142.06    3.19
  -1   2   1  138.18    3.09
  -1   2   1  140.94    3.36
  -1   2   1  136.11    2.94
  -1   2   1  137.49    3.35
  -1   2   1  138.54    3.06
   0  -2  -1    9.88    0.65
   0  -2  -1    8.22    0.52
   0  -2  -1    7.46    0.50
   0  -2  -1    9.37    0.46
   0  -2  -1    8.16    0.60
   0  -2  -1    8.24    0.47
   0  -2  -1    8.40    0.59
   0  -2  -1    8.99    0.62
   0  -2  -1    9.09    0.69
   0  -2  -1    9.20    0.58
   0  -2  -1    8.40    0.67
   0   2   1    9.35    0.56
   0   2   1    9.50    0.57
   0   2   1    9.24    0.57
   0   2   1    9.96    0.63
   0   2   1    8.89    0.45
   0   2   1    8.88    0.69
   0   2   1    8.36    0.63
   0   2   1    8.49    0.50
   0   2   1   10.04    0.66
   0   2   1    9.03    0.48
   0   2   1    8.75    0.64
   0   2   1    9.01    0.57
  -1  -2  -1    8.24    0.59
  -1  -2  -1    8.83    0.70
  -1  -2  -1    8.15    0.53
  -1  -2  -1    9.07    0.62
  -1  -2  -1    9.45    0.61
  -1  -2  -1    9.09    0.69
  -1  -2  -1    8.71    0.61
  -1  -2  -1    8.56    0.40
  -1  -2  -1    7.80    0.52
  -1  -2  -1    8.49    0.67
  -1  -2  -1    8.27    0.59
  -1  -2  -1    9.11    0.51
   1   2   1    9.42    0.70
   1   2   1    9.07    0.51
   1   2   1    9.30    0.59
   1   2   1    9.67    0.67
   1   2   1   10.56    0.74
   1   2   1    9.93    0.71
   1   2   1    8.67    0.58
   1   2   1    8.62    0.59
   1   2   1   10.07    0.60
   1   2   1    8.54    0.49
   1   2   1    8.43    0.37
   1   2   1    8.00    0.63
  -2  -2  -1  169.26    4.02
  -2  -2  -1  163.62    4.28
  -2  -2  -1  170.85    4.44
  -2  -2  -1  171.54    4.66
  -2  -2  -1  169.25    4.08
  -2  -2  -1  166.26    4.34
  -2  -2  -1  176.20    4.46
  -2  -2  -1  174.19    4.49
  -2  -2  -1  167.51    3.91
  -2  -2  -1  167.53    3.87
   2   2   1  172.99    3.64
   2   2   1  172.85    3.79
   2   2   1  168.03    3.98
   2   2   1  167.10    4.34
   2   2   1  166.88    3.98
   2   2   1  169.46    4.43
   2   2   1  167.00    4.62
   2   2   1  167.13    3.69
   2   2   1  163.95    4.28
   2   2   1  168.41    4.41
  -3  -2  -1  119.69    3.62
  -3  -2  -1  119.56    3.20
  -3  -2  -1  114.99    3.13
  -3  -2  -1  122.29    3.77
  -3  -2  -1  123.30    3.62
  -3  -2  -1  123.26    3.52
  -3  -2  -1  118.87    3.31
   3   2   1  117.30    2.83
   3   2   1  122.50    3.57
   3   2   1  118.42    3.23
   3   2   1  126.18    3.66
   3   2   1  112.55    3.52
   3   2   1  122.44    3.20
   3   2   1  128.23    3.86
   3   2   1  118.76    3.49
   3   2   1  124.42    3.07
  -4  -2  -1  210.73    5.60
  -4  -2  -1  201.52    5.90
  -4  -2  -1  203.84    5.65
  -4  -2  -1  202.88    5.03
  -4  -2  -1  199.17    5.03
  -4  -2  -1  209.62    5.39
  -4  -2  -1  208.66    5.73
   4   2   1  204.11    5.74
   4   2   1  205.18    5.62
   4   2   1  208.23    5.13
   4   2   1  206.23    4.58
   4   2   1  208.74    5.69
   4   2   1  213.52    5.69
   4   2   1  211.58    5.99
   4   2   1  208.25    5.29
   4   2   1  197.45    5.56
   4   2   1  209.06    4.85
  -5  -2  -1  212.34    6.13
  -5  -2  -1  220.01    6.29
  -5  -2  -1  222.87    5.97
  -5  -2  -1  220.13    5.59
   5   2   1  228.42    5.32
   5   2   1  225.08    6.59
   5   2   1  228.08    6.29
   5   2   1  220.10    5.81
   5   2   1  221.33    6.48
   5   2   1  222.74    6.25
   5   2   1  222.87    5.66
   5   2   1  210.09    6.14
  -6  -2  -1  119.22    4.18
  -6  -2  -1  109.34    3.69
   6   2   1  115.53    4.14
   6   2   1  117.72    3.85
   6   2   1  112.61    4.36
   6   2   1  113.09    3.75
   6   2   1  118.01    4.23
   6   2   1  112.18    3.35
  -7  -2  -1   78.43    3.15
  -7  -2  -1   67.78    3.27
   7   2   1   76.19    3.46
   7   2   1   67.98    2.96
   7   2   1   72.94    3.06
   7   2   1   76.83    3.41
   7   2   1   66.11    3.45
  -8  -2  -1   22.36    2.07
   8   2   1   26.38    1.97
   8   2   1   29.09    2.25
   8   2   1   25.96    2.00
   8   2   1   26.58    2.28
   8   2   1   25.31    2.25
  -9  -2  -1    7.20    1.39
   9   2   1    6.63    1.54
   9   2   1    4.98    1.20
  10  -3  -1   24.82    2.32
 -10   3   1   29.12    2.30
   9  -3  -1   58.04    2.92
   9  -3  -1   65.26    2.37
   9  -3  -1   63.33    2.48
  -9   3   1   66.39    3.07
  -9   3   1   67.51    2.94
   8  -3  -1   65.46    2.28
   8  -3  -1   65.80    2.73
   8  -3  -1   65.96    2.42
   8  -3  -1   63.30    2.59
   8  -3  -1   65.80    2.87
   8  -3  -1   68.28    2.84
   8  -3  -1   63.22    3.10
  -8   3   1   61.29    2.78
  -8   3   1   66.76    2.74
   7  -3  -1   56.55    1.98
   7  -3  -1   55.03    2.64
   7  -3  -1   55.52    2.14
   7  -3  -1   56.16    2.37
   7  -3  -1   54.27    2.38
   7  -3  -1   53.71    2.41
   7  -3  -1   50.01    2.59
   7  -3  -1   55.12    2.31
   7  -3  -1   51.92    2.25
   7  -3  -1   54.22    2.81
  -7   3   1   53.33    2.24
  -7   3   1   55.92    2.68
  -7   3   1   53.72    2.38
   6  -3  -1   21.37    1.39
   6  -3  -1   21.74    1.22
   6  -3  -1   23.60    1.35
   6  -3  -1   23.14    1.57
   6  -3  -1   24.35    1.18
   6  -3  -1   21.08    1.39
   6  -3  -1   21.79    1.33
   6  -3  -1   23.94    1.37
   6  -3  -1   21.14    1.49
   6  -3  -1   21.46    1.53
   6  -3  -1   18.82    1.51
  -6   3   1   21.31    1.36
  -6   3   1   23.22    1.54
  -6   3   1   22.80    1.62
  -6   3   1   23.67    1.52
  -6   3   1   22.11    1.54
  -6   3   1   23.85    1.44
  -6   3   1   23.42    1.34
   5  -3  -1    5.62    0.81
   5  -3  -1    5.35    0.67
   5  -3  -1    5.72    0.86
   5  -3  -1    3.91    0.62
   5  -3  -1    4.34    0.60
   5  -3  -1    5.80    0.94
   5  -3  -1    5.14    0.84
   5  -3  -1    3.97    0.66
   5  -3  -1    5.67    0.65
   5  -3  -1    4.62    0.72
  -5   3   1    3.61    0.65
  -5   3   1    4.52    0.63
  -5   3   1    4.88    0.72
  -5   3   1    4.25    0.72
  -5   3   1    6.14    0.79
  -5   3   1    4.84    0.47
  -5   3   1    3.15    0.66
  -5   3   1    3.28    0.63
  -5   3   1    3.84    0.67
  -5   3   1    4.56    0.74
   4  -3  -1    5.58    0.63
   4  -3  -1    5.07    0.66
   4  -3  -1    4.39    0.62
   4  -3  -1    5.20    0.74
   4  -3  -1    4.95    0.58
   4  -3  -1    6.17    0.61
   4  -3  -1    5.45    0.70
   4  -3  -1    5.76    0.72
   4  -3  -1    6.16    0.71
   4  -3  -1    6.10    0.62
   4  -3  -1    4.87    0.68
  -4   3   1    4.44    0.61
  -4   3   1    4.67    0.37
  -4   3   1    5.75    0.82
  -4   3   1    6.05    0.81
  -4   3   1    4.36    0.58
  -4   3   1    5.37    0.73
  -4   3   1    5.83    0.79
  -4   3   1    3.58    0.55
  -4   3   1    5.72    0.66
   3  -3  -1  134.84    3.69
   3  -3  -1  134.64    3.67
   3  -3  -1  128.41    3.15
   3  -3  -1  131.26    3.33
   3  -3  -1  129.47    3.56
   3  -3  -1  131.77    3.35
   3  -3  -1  130.05    3.59
   3  -3  -1  130.12    3.46
   3  -3  -1  131.88    2.79
   3  -3  -1  126.88    3.17
   3  -3  -1  129.76    3.59
   3  -3  -1  128.14    3.19
   3  -3  -1  134.68    3.89
  -3   3   1  131.87    3.64
  -3   3   1  128.91    3.66
  -3   3   1  127.86    3.15
  -3   3   1  133.23    3.27
  -3   3   1  126.67    3.58
  -3   3   1  130.06    3.46
   2  -3  -1   95.99    2.67
   2  -3  -1   91.37    2.65
   2  -3  -1   90.05    2.44
   2  -3  -1   93.80    2.74
   2  -3  -1   91.56    2.31
   2  -3  -1   91.42    2.68
   2  -3  -1   96.32    2.55
   2  -3  -1   93.34    2.44
   2  -3  -1   95.64    2.67
  -2   3   1   94.46    2.66
  -2   3   1   88.55    2.63
  -2   3   1   93.82    2.86
  -2   3   1   89.40    2.30
  -2   3   1   92.35    2.63
  -2   3   1   92.08    2.69
  -2   3   1   93.79    2.75
  -2   3   1   87.17    2.38
  -2   3   1   88.60    2.73
  -2   3   1   91.45    2.39
  -2   3   1   91.92    2.90
   1  -3  -1   72.87    2.53
   1  -3  -1   74.67    2.23
   1  -3  -1   67.61    2.28
   1  -3  -1   73.68    2.08
   1  -3  -1   71.78    2.21
   1  -3  -1   73.82    2.34
   1  -3  -1   73.06    2.24
   1  -3  -1   73.77    1.91
   1  -3  -1   69.01    2.39
   1  -3  -1   73.03    2.38
   1  -3  -1   72.86    1.98
   1  -3  -1   75.85    2.18
  -1   3   1   71.93    1.93
  -1   3   1   70.75    2.04
  -1   3   1   71.93    2.58
  -1   3   1   71.82    2.44
  -1   3   1   70.47    2.25
  -1   3   1   72.33    1.96
  -1   3   1   72.21    2.35
  -1   3   1   70.06    1.86
  -1   3   1   75.25    2.21
  -1   3   1   71.90    2.49
  -1   3   1   73.41    2.21
   0  -3  -1  283.32    6.47
   0  -3  -1  280.99    7.08
   0  -3  -1  295.96    6.83
   0  -3  -1  299.50    6.48
   0  -3  -1  300.23    7.29
   0  -3  -1  305.84    6.41
   0  -3  -1  299.16    6.09
   0  -3  -1  294.95    6.97
   0  -3  -1  288.68    7.15
   0  -3  -1  295.13    6.97
   0   3   1  292.86    6.31
   0   3   1  284.97    7.18
   0   3   1  286.90    6.91
   0   3   1  287.17    6.17
   0   3   1  295.10    6.85
   0   3   1  298.31    5.99
   0   3   1  288.27    7.02
   0   3   1  296.25    7.07
   0   3   1  287.76    6.31
   0   3   1  290.94    6.23
   0   3   1  292.35    7.14
   0   3   1  301.51    7.19
  -1  -3  -1  378.86    8.90
  -1  -3  -1  370.05    8.12
  -1  -3  -1  396.86    9.41
  -1  -3  -1  367.84    7.83
  -1  -3  -1  388.03    8.80
  -1  -3  -1  353.43    8.74
  -1  -3  -1  388.45    8.87
  -1  -3  -1  381.60    8.35
  -1  -3  -1  378.74    7.99
  -1  -3  -1  390.03    9.00
   1   3   1  376.58    9.27
   1   3   1  392.45    8.05
   1   3   1  377.72    8.99
   1   3   1  370.93    8.93
   1   3   1  390.21    8.00
   1   3   1  383.04    7.70
   1   3   1  386.88    8.85
   1   3   1  393.64    8.12
   1   3   1  363.88    8.97
   1   3   1  373.21    8.81
  -2  -3  -1  174.54    4.41
  -2  -3  -1  181.62    4.74
  -2  -3  -1  172.60    3.76
  -2  -3  -1  183.16    4.93
  -2  -3  -1  171.08    4.37
  -2  -3  -1  178.62    4.93
  -2  -3  -1  174.83    5.08
  -2  -3  -1  176.54    4.24
  -2  -3  -1  174.04    4.23
  -2  -3  -1  174.27    4.68
   2   3   1  170.31    4.76
   2   3   1  176.50    3.88
   2   3   1  173.32    4.83
   2   3   1  178.13    4.82
   2   3   1  166.51    4.97
   2   3   1  173.28    4.30
   2   3   1  167.81    3.90
   2   3   1  176.88    4.69
   2   3   1  180.38    4.07
  -3  -3  -1   63.70    2.55
  -3  -3  -1   63.40    2.20
  -3  -3  -1   62.78    2.22
  -3  -3  -1   60.17    2.49
  -3  -3  -1   62.70    2.16
  -3  -3  -1   59.98    2.22
  -3  -3  -1   61.07    2.60
  -3  -3  -1   61.19    2.37
   3   3   1   58.33    2.42
   3   3   1   63.95    1.83
   3   3   1   62.90    2.46
   3   3   1   60.59    2.36
   3   3   1   64.29    2.50
   3   3   1   61.09    1.97
   3   3   1   63.29    2.61
   3   3   1   65.25    2.25
  -4  -3  -1   17.62    1.38
  -4  -3  -1   17.27    1.19
  -4  -3  -1   16.03    1.23
  -4  -3  -1   18.88    1.40
  -4  -3  -1   16.84    1.17
  -4  -3  -1   18.57    1.42
  -4  -3  -1   16.52    1.39
   4   3   1   16.09    1.29
   4   3   1   17.51    1.41
   4   3   1   16.09    1.23
   4   3   1   18.25    1.36
   4   3   1   18.22    1.32
   4   3   1   16.48    1.01
   4   3   1   16.06    1.31
   4   3   1   18.00    1.39
   4   3   1   19.82    1.27
  -5  -3  -1    8.25    1.07
  -5  -3  -1    7.63    1.00
  -5  -3  -1    5.36    0.96
   5   3   1    7.88    1.17
   5   3   1    6.12    1.00
   5   3   1    6.90    1.08
   5   3   1    7.96    1.07
   5   3   1    6.76    0.82
   5   3   1    5.73    0.98
   5   3   1    7.33    1.10
  -6  -3  -1    0.95    0.59
  -6  -3  -1    2.99    0.79
   6   3   1    1.70    0.69
   6   3   1    2.45    0.81
   6   3   1    4.37    1.05
   6   3   1    1.25    0.67
   6   3   1    1.62    0.67
  -7  -3  -1   34.15    2.35
  -7  -3  -1   34.65    2.17
   7   3   1   33.77    2.12
   7   3   1   36.19    2.43
   7   3   1   35.23    2.50
   7   3   1   32.92    2.52
   7   3   1   32.56    2.13
  -8  -3  -1   36.29    2.37
   8   3   1   25.48    2.56
   8   3   1   33.99    2.76
   8   3   1   28.12    2.14
  10  -4  -1    0.83    0.75
 -10   4   1   -0.04    0.64
   9  -4  -1    2.47    0.90
   9  -4  -1    1.90    0.65
   9  -4  -1    2.65    0.67
  -9   4   1    2.47    0.80
  -9   4   1    2.58    0.83
   8  -4  -1    7.64    1.19
   8  -4  -1    9.54    1.24
   8  -4  -1   10.78    1.30
   8  -4  -1    9.41    1.38
   8  -4  -1   10.76    1.32
   8  -4  -1    9.60    0.99
   8  -4  -1   10.07    1.20
   8  -4  -1    8.65    1.06
  -8   4   1   11.86    1.44
  -8   4   1   10.75    1.24
   7  -4  -1   42.41    2.12
   7  -4  -1   39.89    1.82
   7  -4  -1   37.31    2.20
   7  -4  -1   40.60    2.42
   7  -4  -1   36.74    2.03
   7  -4  -1   37.58    1.94
   7  -4  -1   40.58    1.71
   7  -4  -1   43.95    2.06
   7  -4  -1   40.38    1.92
   7  -4  -1   37.58    2.27
  -7   4   1   40.30    1.95
  -7   4   1   39.98    2.26
  -7   4   1   41.59    2.08
   6  -4  -1   51.03    2.53
   6  -4  -1   49.56    2.23
   6  -4  -1   46.95    2.11
   6  -4  -1   50.94    2.19
   6  -4  -1   47.32    1.83
   6  -4  -1   53.22    2.03
   6  -4  -1   49.42    2.33
   6  -4  -1   50.91    1.99
   6  -4  -1   51.05    2.42
   6  -4  -1   50.84    2.45
  -6   4   1   49.47    2.35
  -6   4   1   48.14    2.34
  -6   4   1   50.24    1.56
  -6   4   1   48.27    2.49
  -6   4   1   49.29    2.03
  -6   4   1   49.20    2.39
  -6   4   1   52.36    2.19
   5  -4  -1   67.56    1.60
   5  -4  -1   71.38    2.36
   5  -4  -1   68.75    2.46
   5  -4  -1   69.06    2.52
   5  -4  -1   68.20    2.23
   5  -4  -1   70.22    2.72
   5  -4  -1   65.34    2.48
   5  -4  -1   66.25    2.18
   5  -4  -1   68.18    2.62
  -5   4   1   68.74    2.69
  -5   4   1   60.40    2.31
  -5   4   1   69.05    1.86
  -5   4   1   67.07    2.83
  -5   4   1   67.44    2.67
  -5   4   1   65.22    2.60
  -5   4   1   73.18    2.77
  -5   4   1   62.99    2.23
   4  -4  -1  221.30    6.30
   4  -4  -1  234.71    6.02
   4  -4  -1  226.54    5.28
   4  -4  -1  224.11    5.68
   4  -4  -1  234.31    5.97
   4  -4  -1  230.47    5.85
   4  -4  -1  222.99    5.25
   4  -4  -1  230.40    5.49
   4  -4  -1  229.74    5.22
   4  -4  -1  229.84    6.03
   4  -4  -1  222.77    5.93
  -4   4   1  232.21    5.99
  -4   4   1  234.67    6.14
  -4   4   1  228.61    5.38
  -4   4   1  224.53    5.93
  -4   4   1  215.52    6.28
  -4   4   1  233.45    5.70
  -4   4   1  220.75    4.91
  -4   4   1  227.91    5.24
  -4   4   1  224.81    6.00
   3  -4  -1  142.74    4.12
   3  -4  -1  150.03    4.12
   3  -4  -1  145.15    3.85
   3  -4  -1  152.62    4.15
   3  -4  -1  151.55    4.23
   3  -4  -1  151.01    4.49
   3  -4  -1  146.04    3.59
   3  -4  -1  141.59    4.12
   3  -4  -1  147.13    3.81
   3  -4  -1  152.14    3.74
   3  -4  -1  149.26    4.05
  -3   4   1  144.28    3.70
  -3   4   1  150.82    3.62
  -3   4   1  147.38    4.20
  -3   4   1  149.50    4.00
  -3   4   1  150.94    4.19
  -3   4   1  142.37    4.42
   2  -4  -1  109.08    3.61
   2  -4  -1  113.76    3.26
   2  -4  -1  109.44    3.03
   2  -4  -1  114.87    2.89
   2  -4  -1  108.90    3.00
   2  -4  -1  113.06    3.20
   2  -4  -1  111.98    3.41
   2  -4  -1  113.54    3.32
   2  -4  -1  115.81    3.37
   2  -4  -1  111.45    3.30
  -2   4   1  113.71    3.36
  -2   4   1  118.04    3.46
  -2   4   1  111.78    3.60
  -2   4   1  112.65    3.50
  -2   4   1  107.17    3.64
  -2   4   1  113.27    2.85
  -2   4   1  112.98    3.39
  -2   4   1  113.75    2.72
  -2   4   1  115.97    3.31
   1  -4  -1   53.27    2.04
   1  -4  -1   55.54    2.40
   1  -4  -1   50.04    2.13
   1  -4  -1   56.62    2.26
   1  -4  -1   56.82    2.10
   1  -4  -1   57.00    1.76
   1  -4  -1   60.22    2.23
   1  -4  -1   54.58    1.91
   1  -4  -1   55.94    2.30
   1  -4  -1   55.20    1.96
   1  -4  -1   58.61    2.14
   1  -4  -1   56.22    1.79
  -1   4   1   56.50    2.03
  -1   4   1   56.77    2.33
  -1   4   1   52.55    2.34
  -1   4   1   57.73    2.04
  -1   4   1   57.00    1.80
  -1   4   1   55.47    1.81
  -1   4   1   54.76    2.11
  -1   4   1   53.15    2.20
  -1   4   1   58.13    1.71
   0  -4  -1    5.06    0.71
   0  -4  -1    5.25    0.57
   0  -4  -1    6.30    0.80
   0  -4  -1    7.04    0.97
   0  -4  -1    7.29    1.00
   0  -4  -1    7.83    0.82
   0  -4  -1    5.53    0.70
   0  -4  -1    7.06    0.91
   0  -4  -1    6.75    0.91
   0  -4  -1    6.88    0.57
   0  -4  -1    6.79    0.72
   0   4   1    6.97    0.86
   0   4   1    6.76    0.49
   0   4   1    8.17    1.06
   0   4   1    7.28    0.73
   0   4   1    4.76    0.61
   0   4   1    6.04    0.59
   0   4   1    6.22    0.51
   0   4   1    5.82    0.79
   0   4   1    6.23    0.83
   0   4   1    7.44    0.90
  -1  -4  -1   23.88    1.15
  -1  -4  -1   23.80    1.32
  -1  -4  -1   22.23    1.48
  -1  -4  -1   25.26    1.48
  -1  -4  -1   22.54    1.15
  -1  -4  -1   24.75    1.46
  -1  -4  -1   27.33    1.34
  -1  -4  -1   24.12    1.30
   1   4   1   27.55    1.55
   1   4   1   23.30    1.50
   1   4   1   21.57    1.45
   1   4   1   22.38    0.89
   1   4   1   23.21    1.35
   1   4   1   24.01    1.23
   1   4   1   24.58    1.40
   1   4   1   24.50    1.08
  -2  -4  -1    2.25    0.47
  -2  -4  -1    3.52    0.65
  -2  -4  -1    2.85    0.59
  -2  -4  -1    2.83    0.51
  -2  -4  -1    2.95    0.69
  -2  -4  -1    2.40    0.53
  -2  -4  -1    2.26    0.59
  -2  -4  -1    2.44    0.62
  -2  -4  -1    2.09    0.54
   2   4   1    2.49    0.61
   2   4   1    2.49    0.58
   2   4   1    2.30    0.52
   2   4   1    3.53    0.52
   2   4   1    2.82    0.34
   2   4   1    3.13    0.68
   2   4   1    4.83    0.84
   2   4   1    2.56    0.61
  -3  -4  -1   77.21    2.94
  -3  -4  -1   80.74    3.16
  -3  -4  -1   72.46    2.64
  -3  -4  -1   76.71    2.66
  -3  -4  -1   75.22    3.20
  -3  -4  -1   76.56    2.79
  -3  -4  -1   74.57    3.06
  -3  -4  -1   78.64    1.86
  -3  -4  -1   76.57    2.88
   3   4   1   79.30    3.07
   3   4   1   79.52    3.06
   3   4   1   77.83    3.18
   3   4   1   75.55    2.37
   3   4   1   76.20    2.92
   3   4   1   73.61    2.36
   3   4   1   76.98    3.08
   3   4   1   75.19    2.67
  -4  -4  -1   79.25    3.36
  -4  -4  -1   82.77    3.03
  -4  -4  -1   83.49    2.10
  -4  -4  -1   79.93    3.24
  -4  -4  -1   79.51    2.91
   4   4   1   83.20    3.47
   4   4   1   83.44    2.99
   4   4   1   86.34    3.37
   4   4   1   81.41    2.60
   4   4   1   85.30    3.27
   4   4   1   83.61    3.38
  -5  -4  -1  135.63    4.27
  -5  -4  -1  138.30    4.76
   5   4   1  135.79    3.77
   5   4   1  128.86    4.94
   5   4   1  140.62    4.33
   5   4   1  132.89    4.48
   5   4   1  129.05    4.75
   5   4   1  139.03    4.73
  -6  -4  -1  151.08    4.82
  -6  -4  -1  138.78    5.22
   6   4   1  154.53    5.09
   6   4   1  152.92    5.35
   6   4   1  150.02    4.79
   6   4   1  152.24    5.66
   6   4   1  152.53    5.47
  -7  -4  -1   77.22    3.48
   7   4   1   80.05    3.45
   7   4   1   80.98    4.20
   7   4   1   83.99    3.69
   7   4   1   84.65    3.94
   7   4   1   78.84    4.05
  -8  -4  -1   47.53    2.90
   8   4   1   41.20    2.75
   8   4   1   46.22    3.37
  10  -5  -1   54.84    3.09
  10  -5  -1   61.31    2.34
 -10   5   1   61.30    3.22
   9  -5  -1   75.39    3.33
   9  -5  -1   69.90    2.89
   9  -5  -1   71.44    3.16
  -9   5   1   63.87    3.14
  -9   5   1   72.69    3.10
   8  -5  -1   45.13    2.26
   8  -5  -1   44.49    2.19
   8  -5  -1   42.70    1.93
   8  -5  -1   43.58    2.39
   8  -5  -1   43.92    2.32
   8  -5  -1   45.90    2.47
  -8   5   1   47.80    2.32
  -8   5   1   44.05    2.37
   7  -5  -1   33.20    2.00
   7  -5  -1   32.60    1.88
   7  -5  -1   36.60    2.02
   7  -5  -1   33.73    2.12
   7  -5  -1   33.98    1.73
   7  -5  -1   33.75    1.75
   7  -5  -1   33.58    1.65
   7  -5  -1   34.07    1.91
  -7   5   1   34.36    1.94
  -7   5   1   38.37    1.92
   6  -5  -1   38.54    2.07
   6  -5  -1   36.10    1.91
   6  -5  -1   36.84    1.74
   6  -5  -1   36.76    1.68
   6  -5  -1   36.57    1.66
   6  -5  -1   38.90    2.15
   6  -5  -1   39.72    1.98
   6  -5  -1   36.55    1.98
  -6   5   1   37.65    2.24
  -6   5   1   32.88    1.68
  -6   5   1   37.70    2.11
  -6   5   1   36.72    1.32
  -6   5   1   40.66    2.14
  -6   5   1   36.47    1.88
   5  -5  -1   10.07    1.03
   5  -5  -1    6.79    0.95
   5  -5  -1   10.50    1.22
   5  -5  -1    7.08    0.99
   5  -5  -1    7.13    0.92
   5  -5  -1    7.67    1.00
   5  -5  -1    8.26    0.85
   5  -5  -1    7.61    0.96
   5  -5  -1    6.27    0.77
   5  -5  -1    8.16    1.10
  -5   5   1    8.12    1.10
  -5   5   1    6.52    0.79
  -5   5   1    6.10    0.90
  -5   5   1    7.78    0.59
  -5   5   1    6.51    0.95
  -5   5   1    8.45    1.05
  -5   5   1    7.26    0.96
  -5   5   1    9.17    1.21
  -5   5   1    7.71    0.90
   4  -5  -1    1.61    0.48
   4  -5  -1    1.93    0.57
   4  -5  -1    0.68    0.38
   4  -5  -1    1.20    0.43
   4  -5  -1    1.76    0.53
   4  -5  -1    0.98    0.41
   4  -5  -1    1.26    0.48
   4  -5  -1    1.07    0.40
   4  -5  -1    1.13    0.38
   4  -5  -1    2.16    0.55
  -4   5   1    1.74    0.53
  -4   5   1    0.70    0.34
  -4   5   1    0.65    0.39
  -4   5   1    1.17    0.43
  -4   5   1    0.79    0.40
  -4   5   1    1.12    0.42
  -4   5   1    1.09    0.51
  -4   5   1    1.32    0.45
   3  -5  -1   13.62    1.10
   3  -5  -1   14.18    0.91
   3  -5  -1   14.43    1.04
   3  -5  -1   13.43    0.89
   3  -5  -1   13.68    0.97
   3  -5  -1    9.06    0.97
   3  -5  -1   14.16    1.07
   3  -5  -1   13.98    1.20
   3  -5  -1   10.24    1.08
   3  -5  -1   13.71    1.08
  -3   5   1   13.65    1.04
  -3   5   1   11.82    1.05
  -3   5   1   12.56    1.07
  -3   5   1   13.40    0.95
  -3   5   1   13.22    1.07
  -3   5   1   14.61    0.92
  -3   5   1   13.97    1.09
  -3   5   1   13.64    1.17
   2  -5  -1   63.18    2.65
   2  -5  -1   70.10    2.64
   2  -5  -1   64.74    2.16
   2  -5  -1   68.00    2.53
   2  -5  -1   68.23    2.67
   2  -5  -1   69.00    2.88
   2  -5  -1   64.90    2.44
   2  -5  -1   62.06    2.25
   2  -5  -1   64.67    2.36
   2  -5  -1   63.54    2.08
   2  -5  -1   65.45    2.46
   2  -5  -1   61.85    2.54
  -2   5   1   66.41    2.07
  -2   5   1   69.36    2.92
  -2   5   1   67.24    1.97
  -2   5   1   66.60    2.77
  -2   5   1   68.44    2.22
  -2   5   1   63.94    2.50
  -2   5   1   64.41    2.61
   1  -5  -1  183.16    4.69
   1  -5  -1  180.19    5.34
   1  -5  -1  180.10    4.56
   1  -5  -1  187.49    5.72
   1  -5  -1  176.04    5.03
   1  -5  -1  181.82    5.31
   1  -5  -1  165.52    4.81
   1  -5  -1  168.23    5.04
   1  -5  -1  191.44    5.14
   1  -5  -1  180.21    4.36
   1  -5  -1  188.89    5.47
   1  -5  -1  175.95    4.84
  -1   5   1  176.71    4.44
  -1   5   1  177.96    5.00
  -1   5   1  178.56    4.94
  -1   5   1  167.08    5.08
  -1   5   1  185.45    5.35
  -1   5   1  179.87    4.23
  -1   5   1  178.70    4.55
  -1   5   1  173.77    5.50
   0  -5  -1  126.12    3.87
   0  -5  -1  123.69    3.40
   0  -5  -1  129.47    4.30
   0  -5  -1  128.66    3.72
   0  -5  -1  121.79    3.74
   0  -5  -1  127.14    4.03
   0  -5  -1  128.42    4.52
   0  -5  -1  132.45    4.29
   0   5   1  125.26    3.21
   0   5   1  132.51    4.18
   0   5   1  125.17    4.16
   0   5   1  125.73    3.25
   0   5   1  124.16    3.95
   0   5   1  121.26    3.46
   0   5   1  121.37    3.85
   0   5   1  123.38    3.25
   0   5   1  116.44    4.21
   0   5   1  128.81    4.29
  -1  -5  -1  115.03    3.96
  -1  -5  -1  112.81    3.59
  -1  -5  -1  109.04    3.25
  -1  -5  -1  116.78    3.93
  -1  -5  -1  115.20    3.36
  -1  -5  -1  112.59    3.59
  -1  -5  -1  110.50    4.06
  -1  -5  -1  124.00    4.10
  -1  -5  -1  109.61    3.51
   1   5   1  109.52    3.99
   1   5   1  111.68    3.76
   1   5   1  114.32    4.06
   1   5   1  115.94    4.02
   1   5   1  110.36    2.87
   1   5   1  107.79    3.98
   1   5   1  112.63    3.87
   1   5   1  115.93    3.08
   1   5   1  112.60    3.38
  -2  -5  -1  128.17    4.40
  -2  -5  -1  123.98    4.24
  -2  -5  -1  119.25    4.18
  -2  -5  -1  117.37    3.85
  -2  -5  -1  125.82    3.74
  -2  -5  -1  118.76    3.91
  -2  -5  -1  125.51    3.81
  -2  -5  -1  127.23    4.55
   2   5   1  122.83    4.15
   2   5   1  128.46    4.41
   2   5   1  127.63    3.36
   2   5   1  122.37    4.14
   2   5   1  125.83    4.42
   2   5   1  123.77    3.72
   2   5   1  120.62    4.32
  -3  -5  -1  105.72    4.26
  -3  -5  -1  103.83    3.53
  -3  -5  -1  106.86    3.54
  -3  -5  -1  102.37    3.88
  -3  -5  -1  102.08    4.03
  -3  -5  -1  109.85    3.69
   3   5   1  107.30    3.90
   3   5   1  113.29    4.18
   3   5   1  102.49    3.47
   3   5   1  105.01    3.08
   3   5   1  113.26    4.14
   3   5   1  108.88    4.14
  -4  -5  -1   50.01    2.34
  -4  -5  -1   40.23    2.37
   4   5   1   42.65    1.80
   4   5   1   43.33    2.52
   4   5   1   42.12    2.39
   4   5   1   44.26    2.59
   4   5   1   40.18    2.13
  -5  -5  -1    9.60    1.30
  -5  -5  -1   10.05    1.50
   5   5   1   10.20    1.32
   5   5   1    9.77    1.52
   5   5   1    8.35    1.29
   5   5   1    6.07    1.20
   5   5   1    8.18    1.37
  -6  -5  -1   -0.49    0.53
  -6  -5  -1   -0.08    0.52
   6   5   1    0.99    0.78
   6   5   1   -0.40    0.69
   6   5   1    0.17    0.56
   6   5   1    0.35    0.63
   6   5   1   -0.05    0.58
  -7  -5  -1    1.01    0.82
   7   5   1    1.19    0.85
   7   5   1    1.59    0.94
   7   5   1    1.26    0.94
  10  -6  -1    0.78    0.79
 -10   6   1    2.00    0.99
   9  -6  -1    2.17    0.90
   9  -6  -1    1.19    0.70
   9  -6  -1    0.58    0.71
   9  -6  -1    1.28    0.68
  -9   6   1    1.22    0.75
   8  -6  -1    4.63    0.94
   8  -6  -1    3.92    0.91
   8  -6  -1    5.48    0.87
   8  -6  -1    4.61    1.05
  -8   6   1    4.60    1.00
  -8   6   1    5.45    0.99
   7  -6  -1    7.90    1.19
   7  -6  -1   11.19    1.41
   7  -6  -1   11.13    1.18
   7  -6  -1    9.61    1.10
   7  -6  -1    9.83    1.33
   7  -6  -1    9.97    1.27
  -7   6   1   10.15    1.18
  -7   6   1    8.18    1.13
   6  -6  -1   55.19    2.28
   6  -6  -1   53.65    2.50
   6  -6  -1   58.22    2.25
   6  -6  -1   54.94    1.72
   6  -6  -1   49.84    2.15
   6  -6  -1   57.32    2.63
   6  -6  -1   57.75    2.54
   6  -6  -1   52.20    2.82
   6  -6  -1   54.13    2.64
  -6   6   1   58.47    2.35
  -6   6   1   52.50    2.70
  -6   6   1   57.01    2.68
  -6   6   1   55.69    2.43
   5  -6  -1   70.40    2.46
   5  -6  -1   68.64    2.93
   5  -6  -1   66.59    2.49
   5  -6  -1   69.03    2.85
   5  -6  -1   66.30    2.94
   5  -6  -1   67.38    2.80
   5  -6  -1   66.06    2.72
   5  -6  -1   72.91    2.56
   5  -6  -1   67.66    3.16
   5  -6  -1   68.67    2.84
  -5   6   1   67.71    3.03
  -5   6   1   67.52    2.91
  -5   6   1   67.17    2.85
  -5   6   1   65.59    2.44
  -5   6   1   67.42    2.58
  -5   6   1   67.15    2.96
   4  -6  -1   85.19    2.80
   4  -6  -1   84.53    3.18
   4  -6  -1   81.14    3.05
   4  -6  -1   84.75    3.07
   4  -6  -1   82.35    3.15
   4  -6  -1   85.80    3.22
   4  -6  -1   81.47    3.13
   4  -6  -1   82.88    2.82
  -4   6   1   80.72    3.23
  -4   6   1   81.62    3.11
  -4   6   1   85.98    2.71
  -4   6   1   85.27    3.40
  -4   6   1   81.82    3.10
  -4   6   1   81.84    3.44
  -4   6   1   84.55    2.85
  -4   6   1   80.71    3.17
   3  -6  -1   79.94    3.14
   3  -6  -1   77.79    3.01
   3  -6  -1   78.19    3.15
   3  -6  -1   77.80    2.98
   3  -6  -1   72.96    2.87
   3  -6  -1   78.06    2.75
   3  -6  -1  100.68    4.06
   3  -6  -1   80.22    3.09
   3  -6  -1   77.54    2.88
  -3   6   1   78.58    2.53
  -3   6   1   82.71    2.21
  -3   6   1   76.32    2.93
  -3   6   1   79.64    3.08
  -3   6   1   79.28    3.30
  -3   6   1   80.84    2.70
  -3   6   1   76.49    3.12
   2  -6  -1  118.33    4.13
   2  -6  -1  117.64    4.01
   2  -6  -1  110.99    3.88
   2  -6  -1  120.50    3.65
   2  -6  -1  118.46    4.24
   2  -6  -1  119.12    3.88
   2  -6  -1  122.33    4.47
   2  -6  -1  120.81    3.98
   2  -6  -1  121.84    3.51
   2  -6  -1  115.97    3.73
  -2   6   1  121.05    4.35
  -2   6   1  118.14    3.85
  -2   6   1  124.24    4.21
  -2   6   1  125.32    4.62
  -2   6   1  118.46    4.00
  -2   6   1  114.32    3.45
  -2   6   1  116.75    3.27
  -2   6   1  120.49    3.29
   1  -6  -1  169.35    4.67
   1  -6  -1  163.72    5.02
   1  -6  -1  176.86    5.18
   1  -6  -1  165.81    5.01
   1  -6  -1  161.44    5.58
   1  -6  -1  157.62    5.30
   1  -6  -1  163.22    4.44
   1  -6  -1  167.35    4.78
   1  -6  -1  159.46    4.85
  -1   6   1  160.90    4.10
  -1   6   1  167.90    5.31
  -1   6   1  168.34    4.51
  -1   6   1  134.30    4.85
  -1   6   1  163.23    4.38
  -1   6   1  165.09    5.51
  -1   6   1  173.34    4.95
   0  -6  -1   57.36    2.21
   0  -6  -1   57.85    2.41
   0  -6  -1   60.18    2.50
   0  -6  -1   60.15    2.90
   0  -6  -1   59.91    2.65
   0  -6  -1   62.59    2.74
   0  -6  -1   63.16    2.87
   0  -6  -1   62.55    2.74
   0  -6  -1   60.83    3.08
   0   6   1   58.39    2.01
   0   6   1   57.87    2.29
   0   6   1   56.84    2.77
   0   6   1   61.49    2.58
   0   6   1   58.57    2.91
   0   6   1   62.05    2.76
   0   6   1   63.48    2.53
   0   6   1   58.96    2.89
   0   6   1   58.92    2.05
  -1  -6  -1    3.05    0.75
  -1  -6  -1    4.57    0.94
  -1  -6  -1    4.03    0.83
  -1  -6  -1    3.26    0.61
  -1  -6  -1    3.38    0.87
  -1  -6  -1    2.72    0.72
  -1  -6  -1    4.77    0.81
   1   6   1    4.57    1.01
   1   6   1    3.80    0.48
   1   6   1    3.32    0.56
   1   6   1    2.95    0.75
   1   6   1    2.28    0.60
   1   6   1    2.87    0.72
   1   6   1    5.60    1.11
   1   6   1    2.57    0.73
   1   6   1    4.48    0.88
  -2  -6  -1    0.44    0.52
  -2  -6  -1    0.17    0.41
  -2  -6  -1    0.31    0.54
  -2  -6  -1    0.49    0.54
  -2  -6  -1    0.82    0.53
  -2  -6  -1    0.33    0.48
   2   6   1    0.70    0.61
   2   6   1    0.50    0.52
   2   6   1    0.46    0.45
   2   6   1    0.89    0.61
   2   6   1    0.49    0.44
   2   6   1    0.39    0.31
  -3  -6  -1   14.13    1.60
  -3  -6  -1   12.77    1.59
  -3  -6  -1   15.16    1.59
   3   6   1   13.60    1.04
   3   6   1   15.57    1.84
   3   6   1   13.73    1.40
   3   6   1   14.23    1.74
   3   6   1   15.49    1.74
  -4  -6  -1   76.49    3.26
  -4  -6  -1   71.81    3.52
   4   6   1   74.63    3.11
   4   6   1   73.74    3.67
   4   6   1   75.24    3.68
   4   6   1   79.58    3.60
  -5  -6  -1   78.31    3.51
  -5  -6  -1   90.59    4.13
   5   6   1   88.71    3.53
   5   6   1   77.69    3.83
   5   6   1   82.93    4.05
   5   6   1   86.89    4.30
   5   6   1   82.61    3.76
  -6  -6  -1   94.06    4.01
   6   6   1   81.72    3.60
   6   6   1   88.80    4.10
   6   6   1   85.69    4.23
   6   6   1   79.09    4.38
   7   6   1   59.20    3.99
   7   6   1   63.46    3.59
  10  -7  -1   45.43    2.98
  10  -7  -1   50.94    3.16
 -10   7   1   49.41    2.94
   9  -7  -1   69.34    3.42
   9  -7  -1   64.87    3.27
   9  -7  -1   69.28    3.11
  -9   7   1   71.90    3.36
   8  -7  -1   84.73    3.52
   8  -7  -1   85.04    3.19
   8  -7  -1   99.87    3.92
  -8   7   1   83.95    3.36
  -8   7   1   87.87    3.60
   7  -7  -1   61.98    2.61
   7  -7  -1   65.96    3.05
   7  -7  -1   60.48    2.89
   7  -7  -1   63.03    2.59
  -7   7   1   67.37    2.93
  -7   7   1   62.90    2.68
   6  -7  -1   25.08    1.53
   6  -7  -1   19.69    1.61
   6  -7  -1   24.89    1.86
   6  -7  -1   21.81    1.51
   6  -7  -1   23.71    1.76
  -6   7   1   23.68    1.64
  -6   7   1   24.24    1.55
   5  -7  -1    3.72    0.78
   5  -7  -1    2.27    0.68
   5  -7  -1    4.96    1.00
   5  -7  -1    4.79    0.86
   5  -7  -1    3.66    0.84
   5  -7  -1    3.10    0.68
  -5   7   1    3.81    0.82
  -5   7   1    3.52    0.88
  -5   7   1    4.21    0.73
  -5   7   1    4.06    0.90
   4  -7  -1    2.30    0.69
   4  -7  -1    1.67    0.59
   4  -7  -1    1.98    0.70
   4  -7  -1    3.29    0.86
   4  -7  -1    2.10    0.52
   4  -7  -1    2.00    0.66
   4  -7  -1    1.97    0.66
   4  -7  -1    2.02    0.76
   4  -7  -1    2.48    0.66
  -4   7   1    1.57    0.58
  -4   7   1    2.65    0.76
  -4   7   1    2.95    0.81
  -4   7   1    2.58    0.71
  -4   7   1    1.42    0.48
  -4   7   1    2.19    0.74
  -4   7   1    2.34    0.75
  -4   7   1    1.44    0.61
   3  -7  -1   32.66    1.98
   3  -7  -1   35.26    2.04
   3  -7  -1   38.14    2.19
   3  -7  -1   34.02    1.86
   3  -7  -1   34.22    2.31
   3  -7  -1   35.80    1.73
   3  -7  -1   34.05    2.12
   3  -7  -1   37.74    1.99
   3  -7  -1   38.42    2.12
  -3   7   1   36.82    2.20
  -3   7   1   37.28    1.43
  -3   7   1   36.28    2.13
  -3   7   1   36.31    1.68
  -3   7   1   35.06    2.37
  -3   7   1   36.00    1.82
  -3   7   1   35.37    2.28
   2  -7  -1   50.32    2.70
   2  -7  -1   46.79    2.39
   2  -7  -1   46.03    2.73
   2  -7  -1   45.85    2.01
   2  -7  -1   49.01    2.26
   2  -7  -1   44.41    2.43
   2  -7  -1   45.38    2.48
   2  -7  -1   49.63    2.46
   2  -7  -1   49.48    2.25
   2  -7  -1   49.45    2.46
  -2   7   1   44.79    2.06
  -2   7   1   42.32    2.48
  -2   7   1   46.83    2.47
  -2   7   1   48.45    2.34
  -2   7   1   47.75    1.92
  -2   7   1   46.68    2.68
  -2   7   1   45.80    1.89
   1  -7  -1   56.32    2.31
   1  -7  -1   59.79    2.56
   1  -7  -1   58.77    2.78
   1  -7  -1   59.36    2.90
   1  -7  -1   57.44    2.55
   1  -7  -1   56.61    2.75
   1  -7  -1   51.62    2.87
   1  -7  -1   60.61    2.79
   1  -7  -1   65.79    2.98
   1  -7  -1   60.67    3.20
  -1   7   1   61.60    2.44
  -1   7   1   58.53    2.65
  -1   7   1   58.03    2.38
  -1   7   1   59.29    3.14
  -1   7   1   58.00    2.14
  -1   7   1   56.60    2.26
  -1   7   1   56.88    2.95
   0  -7  -1   73.80    3.15
   0  -7  -1   70.03    2.93
   0  -7  -1   73.79    3.46
   0  -7  -1   73.35    3.63
   0  -7  -1   68.09    3.27
   0  -7  -1   67.92    3.16
   0  -7  -1   70.46    2.69
   0   7   1   71.73    3.09
   0   7   1   71.14    2.37
   0   7   1   71.60    3.39
   0   7   1   75.04    3.29
   0   7   1   67.71    3.40
   0   7   1   70.50    3.43
   0   7   1   69.72    2.90
   0   7   1   68.69    2.40
   0   7   1   69.13    2.69
  -1  -7  -1   58.65    2.46
  -1  -7  -1   61.12    2.92
  -1  -7  -1   54.99    2.66
  -1  -7  -1   60.43    3.17
   1   7   1   66.65    3.16
   1   7   1   57.64    2.50
   1   7   1   58.85    3.12
   1   7   1   60.18    2.87
   1   7   1   62.51    2.26
   1   7   1   62.35    3.23
   1   7   1   52.45    3.01
  -2  -7  -1   50.43    2.72
  -2  -7  -1   47.32    2.54
  -2  -7  -1   54.05    3.06
   2   7   1   55.62    3.01
   2   7   1   51.42    2.07
   2   7   1   50.07    2.40
   2   7   1   54.88    3.13
   2   7   1   53.33    2.93
  -3  -7  -1   81.80    3.56
  -3  -7  -1   79.48    3.88
  -3  -7  -1   81.79    3.53
   3   7   1   81.31    3.86
   3   7   1   81.00    4.00
   3   7   1   77.29    3.77
   3   7   1   75.60    3.18
   3   7   1   81.75    3.86
  -4  -7  -1   28.19    2.44
  -4  -7  -1   31.65    2.25
   4   7   1   32.49    2.63
   4   7   1   29.62    2.01
   4   7   1   32.82    2.50
   4   7   1   33.95    2.54
  -5  -7  -1   13.80    1.79
   5   7   1   15.20    2.20
   5   7   1   15.83    2.12
   5   7   1   16.92    2.14
   5   7   1   18.50    1.96
  -6  -7  -1    7.09    1.48
   6   7   1    7.12    1.80
   6   7   1    5.86    1.43
   9  -8  -1    0.56    0.86
   9  -8  -1    1.92    0.90
  -9   8   1    1.33    0.89
   8  -8  -1    1.11    0.81
   8  -8  -1    1.62    0.72
   8  -8  -1    1.24    0.76
  -8   8   1    1.56    0.74
  -8   8   1    0.89    0.71
   7  -8  -1   18.67    1.73
   7  -8  -1   17.59    1.89
   7  -8  -1   20.90    1.77
   7  -8  -1   20.33    1.56
  -7   8   1   18.52    1.83
  -7   8   1   18.33    1.71
   6  -8  -1   50.26    2.81
   6  -8  -1   53.89    2.53
   6  -8  -1   51.15    2.36
   6  -8  -1   49.37    2.64
   6  -8  -1   53.27    2.79
  -6   8   1   49.22    2.50
  -6   8   1   48.05    2.31
   5  -8  -1   48.74    2.73
   5  -8  -1   51.35    2.47
   5  -8  -1   53.13    2.71
   5  -8  -1   55.06    2.78
  -5   8   1   51.49    2.28
  -5   8   1   46.17    2.87
  -5   8   1   58.29    2.57
   4  -8  -1  100.91    4.08
   4  -8  -1   99.72    3.90
   4  -8  -1  105.62    3.71
  -4   8   1  104.40    3.59
  -4   8   1   96.45    4.28
  -4   8   1  104.35    3.37
   3  -8  -1   89.64    3.77
   3  -8  -1   90.85    3.66
   3  -8  -1   87.14    3.39
  -3   8   1   89.88    3.03
  -3   8   1   91.16    3.27
  -3   8   1   88.79    2.79
  -3   8   1   91.59    3.93
  -3   8   1   86.03    4.01
   2  -8  -1   61.22    3.01
   2  -8  -1   63.08    2.82
   2  -8  -1   57.06    2.85
   2  -8  -1   59.49    3.19
  -2   8   1   57.49    2.52
  -2   8   1   59.06    3.24
  -2   8   1   58.27    2.36
  -2   8   1   59.84    3.16
  -2   8   1   58.66    2.31
   1  -8  -1   38.43    2.46
   1  -8  -1   43.47    2.52
   1  -8  -1   43.80    2.35
   1  -8  -1   39.36    2.64
  -1   8   1   39.95    2.63
  -1   8   1   42.46    1.90
  -1   8   1   43.15    2.17
  -1   8   1   38.33    2.06
  -1   8   1   40.63    1.98
  -1   8   1   43.42    2.81
   0  -8  -1   24.87    1.96
   0  -8  -1   20.77    2.17
   0  -8  -1   21.48    1.77
   0   8   1   24.74    2.13
   0   8   1   22.97    1.38
   0   8   1   26.18    1.71
   0   8   1   26.72    1.37
   0   8   1   24.69    2.60
   0   8   1   24.01    1.76
  -1  -8  -1    7.82    1.36
  -1  -8  -1   10.72    1.70
  -1  -8  -1   10.25    1.45
   1   8   1    9.97    1.04
   1   8   1    9.89    1.67
   1   8   1   10.27    1.73
   1   8   1   10.54    1.48
   1   8   1    9.79    1.51
   1   8   1    9.22    1.23
  -2  -8  -1    0.71    0.73
  -2  -8  -1    0.03    0.57
  -2  -8  -1    0.59    0.71
   2   8   1    0.67    0.69
   2   8   1    0.15    0.71
   2   8   1   -0.21    0.46
   2   8   1    0.60    0.52
   2   8   1   -0.16    0.67
  -3  -8  -1    2.43    0.97
  -3  -8  -1    3.75    1.04
   3   8   1    2.97    1.09
   3   8   1    3.59    1.17
   3   8   1    5.74    1.36
   3   8   1    4.69    1.02
  -4  -8  -1   12.46    1.88
   4   8   1   14.25    1.75
   4   8   1   13.21    2.02
   4   8   1   12.81    2.08
  -5  -8  -1   17.66    2.23
   5   8   1   15.33    2.30
   5   8   1   17.00    2.29
   9  -9  -1   62.05    3.54
  -9   9   1   60.74    3.32
   8  -9  -1   84.80    3.86
   8  -9  -1   93.29    3.71
   8  -9  -1   98.07    4.31
  -8   9   1   94.79    4.00
  -8   9   1   94.48    3.72
   7  -9  -1   83.96    3.86
   7  -9  -1   81.03    3.39
   7  -9  -1   78.93    3.60
  -7   9   1   74.67    3.41
  -7   9   1   79.39    3.29
   6  -9  -1   39.56    2.18
   6  -9  -1   35.30    2.20
   6  -9  -1   35.85    2.49
   6  -9  -1   37.42    2.41
  -6   9   1   39.15    2.13
  -6   9   1   33.09    2.17
   5  -9  -1    8.34    1.31
   5  -9  -1    8.58    1.47
   5  -9  -1    6.70    1.26
  -5   9   1    5.55    1.01
  -5   9   1    6.85    1.02
   4  -9  -1    0.46    0.67
   4  -9  -1    0.58    0.61
   4  -9  -1    0.51    0.57
  -4   9   1    0.01    0.64
  -4   9   1    0.45    0.46
  -4   9   1    0.52    0.52
   3  -9  -1    9.19    1.42
   3  -9  -1    8.81    1.35
   3  -9  -1    9.04    1.56
  -3   9   1    8.13    1.53
  -3   9   1    7.29    1.01
  -3   9   1    5.77    1.00
  -3   9   1    9.14    1.04
   2  -9  -1   37.81    2.32
   2  -9  -1   39.01    2.55
   2  -9  -1   35.42    2.64
   2  -9  -1   35.66    2.41
  -2   9   1   34.79    1.85
  -2   9   1   38.40    2.12
  -2   9   1   37.14    1.99
  -2   9   1   41.94    2.84
  -2   9   1   38.83    2.19
   1  -9  -1   55.20    2.85
   1  -9  -1   56.65    3.33
   1  -9  -1   56.11    3.04
   1  -9  -1   56.76    3.09
  -1   9   1   53.00    2.57
  -1   9   1   59.33    3.46
  -1   9   1   51.93    2.59
  -1   9   1   57.38    2.36
  -1   9   1   48.70    2.30
   0  -9  -1   46.84    2.83
   0  -9  -1   45.47    2.68
   0  -9  -1   45.45    2.85
   0  -9  -1   46.46    3.12
   0   9   1   47.58    2.64
   0   9   1   43.80    2.38
   0   9   1   46.51    3.20
   0   9   1   44.55    2.06
  -1  -9  -1   92.58    3.98
  -1  -9  -1   84.34    3.97
   1   9   1   90.13    4.31
   1   9   1   89.44    3.57
   1   9   1   90.94    4.58
   1   9   1   89.00    4.01
  -2  -9  -1   40.18    2.66
  -2  -9  -1   41.70    2.84
   2   9   1   42.06    2.91
   2   9   1   46.75    3.32
   2   9   1   39.03    2.36
  -3  -9  -1   18.82    2.31
  -3  -9  -1   19.56    2.21
   3   9   1   20.33    2.52
   3   9   1   16.48    1.84
   3   9   1   17.26    2.34
  -4  -9  -1   14.94    2.20
   4   9   1   13.46    2.22
   8 -10  -1   -0.29    0.70
   8 -10  -1    0.95    0.78
   8 -10  -1    1.07    0.94
  -8  10   1    0.33    0.74
   7 -10  -1    0.05    0.83
   7 -10  -1   -0.57    0.56
  -7  10   1    0.19    0.70
  -7  10   1   -0.05    0.63
   6 -10  -1   12.08    1.68
   6 -10  -1   11.26    1.74
  -6  10   1   12.34    1.53
  -6  10   1   13.70    1.73
   5 -10  -1   30.81    2.47
   5 -10  -1   28.75    2.18
  -5  10   1   28.73    2.08
  -5  10   1   27.94    1.87
   4 -10  -1   68.05    3.31
   4 -10  -1   70.04    3.56
  -4  10   1   65.28    3.08
  -4  10   1   69.23    2.88
   3 -10  -1  107.00    4.27
   3 -10  -1  103.50    4.41
  -3  10   1  105.57    4.00
  -3  10   1  106.30    3.66
   2 -10  -1   80.47    3.71
   2 -10  -1   79.65    3.83
  -2  10   1   76.52    3.22
  -2  10   1   85.30    3.49
  -2  10   1   80.68    3.08
  -2  10   1   89.77    4.50
   1 -10  -1   68.62    3.50
   1 -10  -1   61.85    3.27
  -1  10   1   64.56    3.01
  -1  10   1   65.90    3.13
  -1  10   1   68.30    3.96
  -1  10   1   58.46    2.74
   0 -10  -1   40.61    2.75
   0 -10  -1   45.49    2.93
   0  10   1   46.63    3.41
   0  10   1   41.31    2.64
   0  10   1   42.69    2.48
  -1 -10  -1   16.38    2.02
  -1 -10  -1   20.77    2.38
   1  10   1   19.78    2.00
   1  10   1   15.76    2.04
  -2 -10  -1    0.47    0.89
  -2 -10  -1    0.75    0.83
   2  10   1   -0.23    0.58
   2  10   1    0.69    0.93
  -3 -10  -1    2.68    1.30
   3  10   1    3.07    1.30
   7 -11  -1   45.56    3.24
   7 -11  -1   49.41    2.99
  -7  11   1   58.01    3.21
   6 -11  -1   52.29    3.36
   6 -11  -1   50.40    3.04
  -6  11   1   49.52    2.92
  -6  11   1   49.59    2.66
   5 -11  -1   20.89    2.39
   5 -11  -1   22.48    2.26
  -5  11   1   26.91    2.11
  -5  11   1   23.84    1.84
   4 -11  -1    0.79    0.79
   4 -11  -1    4.73    1.25
  -4  11   1    3.99    1.01
  -4  11   1    4.00    0.97
   3 -11  -1    1.47    0.94
   3 -11  -1    0.63    0.87
  -3  11   1    0.82    0.73
   2 -11  -1    4.97    1.28
   2 -11  -1    5.15    1.39
  -2  11   1    5.09    1.16
   1 -11  -1   39.77    2.77
   1 -11  -1   43.82    2.96
  -1  11   1   38.58    2.56
  -1  11   1   36.73    2.45
   0 -11  -1   50.30    3.18
   0 -11  -1   50.20    3.24
   0  11   1   51.40    3.16
   0  11   1   49.93    2.78
  -1 -11  -1   34.33    3.25
  -1 -11  -1   30.13    2.86
   1  11   1   39.41    2.94
   1  11   1   35.64    2.45
   6 -12  -1    3.03    1.29
   6 -12  -1    2.47    0.99
  -6  12   1    4.51    1.27
   5 -12  -1   16.74    2.30
   5 -12  -1   16.98    2.15
  -5  12   1   17.11    2.08
   4 -12  -1   31.05    2.95
   4 -12  -1   29.00    2.95
  -4  12   1   38.01    2.60
   3 -12  -1   59.80    3.57
   3 -12  -1   63.81    3.71
  -3  12   1   53.29    3.10
   2 -12  -1   72.52    3.95
   2 -12  -1   82.78    4.18
  -2  12   1   72.75    3.56
   1 -12  -1   69.51    3.95
   1 -12  -1   70.74    3.95
  -1  12   1   73.41    3.58
  -3  13  -2   15.81    2.10
   3 -13   2   18.43    2.42
   3 -13   2   17.96    2.39
  -4  13  -2   16.00    2.12
   4 -13   2   11.25    1.90
   4 -13   2   13.66    2.11
   0  12  -2    8.80    1.67
   0  12  -2    8.69    1.55
   0 -12   2    9.29    1.80
   0 -12   2    9.61    1.81
  -1  12  -2    1.03    0.73
  -1  12  -2    0.19    0.80
   1 -12   2    1.40    0.96
   1 -12   2    0.29    0.93
  -2  12  -2    6.94    1.42
  -2  12  -2    5.67    1.12
   2 -12   2    7.54    1.54
   2 -12   2    6.92    1.52
  -3  12  -2    6.13    1.25
  -3  12  -2    7.13    1.41
   3 -12   2    5.56    1.45
   3 -12   2    7.15    1.53
  -4  12  -2   16.84    2.00
  -4  12  -2   17.97    1.95
   4 -12   2   19.18    2.22
   4 -12   2   15.98    2.19
  -5  12  -2   49.76    3.07
   5 -12   2   52.42    3.34
   5 -12   2   48.73    3.00
   5 -12   2   49.93    2.79
  -6  12  -2   40.32    2.78
   6 -12   2   35.20    2.32
   6 -12   2   41.21    3.07
   6 -12   2   37.15    2.65
   7 -12   2   39.93    2.80
   2  11  -2   24.54    2.45
  -2 -11   2   23.01    2.61
   1  11  -2   24.19    2.38
   1  11  -2   35.45    2.05
  -1 -11   2   34.93    3.17
  -1 -11   2   35.02    2.69
   0  11  -2   69.96    3.09
   0  11  -2   68.84    3.41
   0  11  -2   64.54    2.77
   0 -11   2   71.14    3.77
   0 -11   2   66.58    3.59
  -1  11  -2   62.03    3.21
  -1  11  -2   61.19    3.11
  -1  11  -2   66.86    2.99
  -1  11  -2   60.73    2.73
   1 -11   2   65.27    3.50
   1 -11   2   59.26    3.31
  -2  11  -2   39.68    2.29
  -2  11  -2   44.29    2.65
  -2  11  -2   38.06    2.23
   2 -11   2   44.03    2.87
   2 -11   2   39.76    2.71
  -3  11  -2    6.61    1.32
  -3  11  -2    7.25    1.19
   3 -11   2    7.80    1.55
   3 -11   2    7.08    1.34
  -4  11  -2   11.77    1.47
  -4  11  -2   11.31    1.58
   4 -11   2   11.83    1.55
   4 -11   2    9.35    1.60
   4 -11   2    8.94    1.45
  -5  11  -2    9.99    1.59
  -5  11  -2    8.62    1.31
   5 -11   2    8.51    1.41
   5 -11   2    8.18    1.55
   5 -11   2    8.94    1.36
  -6  11  -2    6.17    1.21
  -6  11  -2    5.34    1.24
   6 -11   2    6.98    1.38
   6 -11   2    5.53    1.44
   6 -11   2    5.89    1.10
  -7  11  -2    1.48    0.90
   7 -11   2    0.91    0.69
   7 -11   2    2.72    1.14
   7 -11   2    1.56    0.87
  -8  11  -2    1.99    0.98
   8 -11   2    1.67    1.10
   3  10  -2   83.57    3.95
  -3 -10   2   91.85    4.52
   2  10  -2   99.94    3.35
   2  10  -2  101.07    4.23
  -2 -10   2  105.60    4.72
   1  10  -2   99.25    4.07
   1  10  -2   94.61    3.36
   1  10  -2   97.91    3.67
  -1 -10   2   93.63    4.31
  -1 -10   2  104.36    4.40
   0  10  -2   34.26    2.31
   0  10  -2   30.64    1.96
   0  10  -2   29.69    1.76
   0 -10   2   25.48    2.44
   0 -10   2   29.91    2.67
  -1  10  -2    5.93    1.01
  -1  10  -2    3.90    1.04
  -1  10  -2    4.22    0.86
   1 -10   2    5.02    1.14
   1 -10   2    5.54    1.22
  -2  10  -2    0.24    0.48
  -2  10  -2    0.29    0.46
  -2  10  -2    0.55    0.60
  -2  10  -2    0.88    0.52
   2 -10   2    0.35    0.61
   2 -10   2   -1.00    0.54
  -3  10  -2   21.82    1.63
  -3  10  -2   25.45    1.95
  -3  10  -2   22.80    1.68
   3 -10   2   25.42    1.97
   3 -10   2   22.94    2.33
  -4  10  -2   44.23    2.36
  -4  10  -2   48.14    2.64
   4 -10   2   46.77    2.83
   4 -10   2   44.91    2.46
   4 -10   2   45.16    2.57
  -5  10  -2   80.75    3.59
  -5  10  -2   85.61    3.44
   5 -10   2   85.44    3.91
   5 -10   2   87.94    3.63
   5 -10   2   84.32    3.47
  -6  10  -2   51.99    2.70
  -6  10  -2   52.23    2.87
   6 -10   2   54.18    3.14
   6 -10   2   53.04    2.63
   6 -10   2   57.99    2.86
  -7  10  -2   47.36    2.77
   7 -10   2   38.67    2.17
   7 -10   2   39.53    2.37
   7 -10   2   39.20    2.70
  -8  10  -2   26.05    2.56
   8 -10   2   21.06    2.33
   4   9  -2    1.69    0.96
  -4  -9   2    3.59    1.23
   3   9  -2   -0.40    0.63
   3   9  -2    0.07    0.36
  -3  -9   2    0.23    0.73
   2   9  -2    8.81    1.39
   2   9  -2    9.79    1.11
   2   9  -2    7.73    1.19
  -2  -9   2    8.06    1.45
   1   9  -2   40.79    3.13
   1   9  -2   40.86    2.15
   1   9  -2   36.38    1.91
   1   9  -2   39.03    2.37
  -1  -9   2   40.78    2.64
  -1  -9   2   37.03    2.46
   0   9  -2   81.75    3.03
   0   9  -2   83.20    4.17
   0   9  -2   77.58    3.07
   0   9  -2   82.71    3.43
   0  -9   2   77.87    3.49
   0  -9   2   85.90    3.84
   0  -9   2   82.43    3.72
  -1   9  -2   70.24    2.82
  -1   9  -2   73.96    3.79
  -1   9  -2   73.66    2.93
  -1   9  -2   75.57    3.20
   1  -9   2   75.39    3.51
   1  -9   2   78.41    3.37
   1  -9   2   70.81    3.37
  -2   9  -2  114.88    3.83
  -2   9  -2  108.34    4.68
  -2   9  -2  118.45    3.89
  -2   9  -2  118.09    4.14
   2  -9   2  116.01    4.38
   2  -9   2  121.17    4.52
   2  -9   2  116.02    4.20
  -3   9  -2   79.99    3.05
  -3   9  -2   79.73    3.08
  -3   9  -2   79.89    3.29
  -3   9  -2   79.28    2.63
   3  -9   2   83.15    3.66
   3  -9   2   81.13    3.57
   3  -9   2   81.93    3.55
   3  -9   2   82.47    3.35
  -4   9  -2   49.04    2.54
  -4   9  -2   52.60    2.42
   4  -9   2   51.53    2.54
   4  -9   2   49.06    2.44
   4  -9   2   50.89    2.16
   4  -9   2   51.41    2.78
   4  -9   2   47.70    2.72
   4  -9   2   48.06    2.75
  -5   9  -2   22.32    1.75
  -5   9  -2   24.39    1.71
   5  -9   2   23.97    1.69
   5  -9   2   22.83    1.93
   5  -9   2   26.38    1.79
   5  -9   2   25.92    2.36
   5  -9   2   17.91    1.95
  -6   9  -2    1.26    0.67
  -6   9  -2    0.14    0.49
   6  -9   2    0.32    0.64
   6  -9   2    0.73    0.55
   6  -9   2    0.80    0.53
  -7   9  -2    1.13    0.59
  -7   9  -2    0.04    0.58
   7  -9   2    0.07    0.47
   7  -9   2   -0.65    0.59
   7  -9   2    0.96    0.60
  -8   9  -2   -0.31    0.59
   8  -9   2    0.41    0.45
   8  -9   2    0.66    0.47
   8  -9   2    0.57    0.81
  -9   9  -2    5.11    1.21
   9  -9   2    5.30    1.30
   5   8  -2   22.91    2.39
  -5  -8   2   22.86    2.53
   4   8  -2   64.48    3.23
   4   8  -2   62.36    2.35
  -4  -8   2   69.42    3.57
   3   8  -2  130.44    4.70
   3   8  -2  131.57    4.03
   3   8  -2  131.85    5.46
   3   8  -2  136.51    4.35
  -3  -8   2  137.17    5.06
   2   8  -2  162.65    6.04
   2   8  -2  162.25    4.79
   2   8  -2  167.50    5.26
   2   8  -2  154.33    4.62
  -2  -8   2  156.65    5.34
  -2  -8   2  159.55    5.48
   1   8  -2  120.42    3.87
   1   8  -2  113.45    4.82
   1   8  -2  120.60    3.80
   1   8  -2  119.53    4.21
   1   8  -2  113.08    4.85
  -1  -8   2  118.12    4.87
  -1  -8   2  123.18    4.38
  -1  -8   2  117.01    4.41
   0   8  -2   95.50    4.31
   0   8  -2  105.32    4.40
   0   8  -2  100.39    3.42
   0   8  -2   96.93    3.64
   0   8  -2  106.37    3.45
   0   8  -2   99.92    2.80
   0   8  -2  109.19    4.57
   0  -8   2  108.92    4.17
   0  -8   2   99.69    3.80
   0  -8   2  102.62    4.39
   0  -8   2  105.29    4.01
   0  -8   2  102.36    3.53
   0  -8   2   99.51    3.98
  -1   8  -2   48.91    2.76
  -1   8  -2   45.99    2.77
  -1   8  -2   46.37    2.08
  -1   8  -2   48.01    2.83
  -1   8  -2   45.70    2.31
  -1   8  -2   49.00    2.62
  -1   8  -2   43.91    2.08
   1  -8   2   45.00    2.73
   1  -8   2   43.40    2.49
   1  -8   2   40.83    2.54
   1  -8   2   45.49    2.89
   1  -8   2   43.45    2.45
   1  -8   2   44.82    2.62
   1  -8   2   49.97    2.59
  -2   8  -2    2.62    0.62
  -2   8  -2    1.76    0.55
  -2   8  -2    1.83    0.70
  -2   8  -2    1.54    0.72
  -2   8  -2    1.64    0.67
  -2   8  -2    1.49    0.59
   2  -8   2    1.46    0.46
   2  -8   2    2.74    0.79
   2  -8   2    1.69    0.73
   2  -8   2    0.74    0.51
   2  -8   2    2.13    0.83
   2  -8   2    2.41    0.76
   2  -8   2    2.24    0.69
   2  -8   2    0.67    0.56
   2  -8   2    2.14    0.73
  -3   8  -2   11.62    1.50
  -3   8  -2   14.47    1.16
  -3   8  -2   14.19    1.49
  -3   8  -2   14.62    0.91
  -3   8  -2   12.35    1.20
  -3   8  -2   13.32    1.66
  -3   8  -2   13.38    1.61
   3  -8   2   17.71    2.11
   3  -8   2   13.91    1.12
   3  -8   2   13.47    1.51
   3  -8   2   13.76    1.67
   3  -8   2   17.26    1.40
   3  -8   2   14.51    1.55
   3  -8   2   16.23    1.82
   3  -8   2   12.83    1.50
  -4   8  -2   42.14    2.04
  -4   8  -2   46.55    2.48
  -4   8  -2   41.17    2.06
  -4   8  -2   41.97    2.17
   4  -8   2   41.08    2.09
   4  -8   2   39.30    2.33
   4  -8   2   42.93    2.52
   4  -8   2   41.31    2.45
   4  -8   2   41.12    1.74
   4  -8   2   42.71    2.13
   4  -8   2   43.81    2.38
   4  -8   2   39.69    1.88
   4  -8   2   39.27    2.63
   4  -8   2   43.32    2.40
  -5   8  -2   90.46    3.30
  -5   8  -2   97.29    3.55
  -5   8  -2   88.65    3.78
   5  -8   2   92.10    3.33
   5  -8   2   96.58    4.05
   5  -8   2   96.83    3.69
   5  -8   2   94.67    3.40
   5  -8   2  100.46    4.36
   5  -8   2   97.70    3.22
   5  -8   2  100.32    3.90
   5  -8   2   94.31    3.75
  -6   8  -2  105.81    3.79
  -6   8  -2   99.86    3.57
   6  -8   2  104.25    3.36
   6  -8   2  103.15    3.11
   6  -8   2  107.31    3.95
   6  -8   2  102.30    3.55
   6  -8   2   94.45    3.43
   6  -8   2  106.26    4.18
   6  -8   2  109.53    4.07
   6  -8   2  103.97    3.52
  -7   8  -2   91.17    3.46
  -7   8  -2   87.42    3.54
   7  -8   2   90.43    3.69
   7  -8   2   94.47    3.26
   7  -8   2   90.81    3.01
   7  -8   2   90.46    3.98
   7  -8   2   83.16    3.07
  -8   8  -2   59.04    2.97
  -8   8  -2   57.72    2.79
   8  -8   2   64.20    3.09
   8  -8   2   53.37    2.15
   8  -8   2   53.90    2.09
  -9   8  -2   18.99    2.08
   9  -8   2   19.22    2.12
   6   7  -2   18.80    2.11
  -6  -7   2   15.45    2.10
   5   7  -2   15.89    1.09
   5   7  -2   17.79    1.96
  -5  -7   2   13.61    1.79
   4   7  -2   25.02    2.19
   4   7  -2   19.62    1.29
   4   7  -2   22.33    2.12
   4   7  -2   20.36    1.57
  -4  -7   2   21.02    2.07
   3   7  -2    6.37    0.96
   3   7  -2    6.23    1.16
   3   7  -2    7.08    1.33
   3   7  -2    6.53    0.90
   3   7  -2    5.79    1.14
  -3  -7   2    8.74    1.34
  -3  -7   2    7.70    1.41
   2   7  -2    5.41    1.00
   2   7  -2    6.45    1.27
   2   7  -2    5.31    0.80
   2   7  -2    5.36    0.83
   2   7  -2    5.27    1.11
   2   7  -2    5.31    1.15
  -2  -7   2    5.75    1.17
  -2  -7   2    5.36    1.04
  -2  -7   2    4.42    0.95
   1   7  -2   15.87    1.73
   1   7  -2   18.79    1.77
   1   7  -2   15.05    1.21
   1   7  -2   20.27    2.12
   1   7  -2   20.02    2.12
   1   7  -2   19.36    1.26
   1   7  -2   19.84    2.08
   1   7  -2   16.19    1.76
  -1  -7   2   13.51    1.45
  -1  -7   2   15.66    1.86
  -1  -7   2   18.87    2.05
  -1  -7   2   18.87    1.57
  -1  -7   2   16.08    1.67
  -1  -7   2   18.62    1.93
   0   7  -2   38.03    2.21
   0   7  -2   37.79    2.38
   0   7  -2   35.40    2.26
   0   7  -2   36.26    2.35
   0   7  -2   35.23    1.77
   0   7  -2   29.69    2.11
   0   7  -2   37.53    1.99
   0   7  -2   35.54    1.73
   0  -7   2   35.44    2.25
   0  -7   2   37.37    2.11
   0  -7   2   35.14    1.75
   0  -7   2   33.46    2.19
   0  -7   2   36.15    2.02
   0  -7   2   36.07    2.16
   0  -7   2   43.72    2.98
   0  -7   2   33.65    2.25
   0  -7   2   39.42    2.18
   0  -7   2   35.98    2.23
  -1   7  -2   39.01    2.36
  -1   7  -2   38.00    2.26
  -1   7  -2   37.93    2.36
  -1   7  -2   41.12    1.87
  -1   7  -2   41.17    1.85
  -1   7  -2   39.39    2.33
  -1   7  -2   40.74    2.02
  -1   7  -2   39.24    2.19
  -1   7  -2   41.56    2.50
   1  -7   2   42.13    2.35
   1  -7   2   37.85    2.25
   1  -7   2   41.28    2.42
   1  -7   2   42.88    2.10
   1  -7   2   42.02    2.27
   1  -7   2   39.81    2.15
   1  -7   2   40.81    2.20
   1  -7   2   43.15    2.61
   1  -7   2   43.33    2.48
  -2   7  -2  100.07    3.95
  -2   7  -2  100.94    3.92
  -2   7  -2   96.72    3.19
  -2   7  -2   99.89    3.34
  -2   7  -2   98.96    3.74
  -2   7  -2   98.59    3.68
  -2   7  -2   94.25    3.09
  -2   7  -2   96.09    3.86
   2  -7   2   94.04    3.76
   2  -7   2   98.91    3.78
   2  -7   2   96.54    3.60
   2  -7   2   96.58    3.83
   2  -7   2  122.97    5.01
   2  -7   2   96.16    3.31
   2  -7   2   92.68    3.84
   2  -7   2   93.99    3.09
   2  -7   2   94.13    3.49
   2  -7   2   95.15    3.61
  -3   7  -2  158.42    5.51
  -3   7  -2  152.59    4.30
  -3   7  -2  158.81    5.06
  -3   7  -2  151.05    5.09
  -3   7  -2  155.67    4.51
  -3   7  -2  161.48    5.05
  -3   7  -2  160.26    5.24
  -3   7  -2  146.43    5.14
  -3   7  -2  155.57    4.48
   3  -7   2  164.78    4.99
   3  -7   2  164.61    5.21
   3  -7   2  151.49    4.86
   3  -7   2  162.22    4.81
   3  -7   2  161.96    5.25
   3  -7   2  159.02    4.38
   3  -7   2  147.97    5.44
   3  -7   2  151.56    4.63
   3  -7   2  156.57    5.09
   3  -7   2  154.68    4.46
  -4   7  -2   62.11    2.55
  -4   7  -2   65.49    2.47
  -4   7  -2   66.99    3.15
  -4   7  -2   66.27    2.98
  -4   7  -2   59.95    2.84
  -4   7  -2   69.41    2.59
  -4   7  -2   60.72    2.78
  -4   7  -2   68.29    3.00
   4  -7   2   64.79    2.91
   4  -7   2   63.52    2.50
   4  -7   2   65.61    2.37
   4  -7   2   63.98    2.96
   4  -7   2   64.49    2.73
   4  -7   2   62.41    2.76
   4  -7   2   65.96    2.58
   4  -7   2   67.24    2.96
   4  -7   2   64.82    2.02
   4  -7   2   65.97    2.84
   4  -7   2   64.20    3.13
  -5   7  -2   59.41    2.53
  -5   7  -2   62.96    2.48
  -5   7  -2   60.16    2.80
   5  -7   2   61.00    2.71
   5  -7   2   63.73    2.30
   5  -7   2   61.56    3.11
   5  -7   2   60.91    2.81
   5  -7   2   60.68    2.43
   5  -7   2   55.70    2.82
   5  -7   2   63.81    2.68
   5  -7   2   61.21    2.88
   5  -7   2   64.62    2.45
  -6   7  -2   41.86    2.04
  -6   7  -2   38.48    2.28
  -6   7  -2   38.25    2.08
   6  -7   2   40.95    1.78
   6  -7   2   40.93    2.34
   6  -7   2   42.59    2.59
   6  -7   2   39.70    1.57
   6  -7   2   36.68    1.81
   6  -7   2   40.15    2.21
   6  -7   2   41.81    2.42
   6  -7   2   39.47    2.13
   6  -7   2   44.11    1.88
   6  -7   2   37.58    1.82
   6  -7   2   39.47    2.39
  -7   7  -2    7.93    1.27
  -7   7  -2    9.69    1.29
  -7   7  -2    9.81    1.20
   7  -7   2   10.66    1.06
   7  -7   2    7.22    1.19
   7  -7   2    7.76    1.21
   7  -7   2    8.43    0.99
   7  -7   2    6.92    1.34
   7  -7   2    9.03    1.02
   7  -7   2    7.67    1.18
  -8   7  -2    2.74    0.86
  -8   7  -2    2.03    0.73
   8  -7   2    2.82    0.92
   8  -7   2    1.80    0.78
  -9   7  -2    2.90    0.95
   9  -7   2    2.48    0.96
   9  -7   2    2.51    0.92
 -10   7  -2   15.63    1.93
  10  -7   2   16.42    1.95
   7   6  -2    0.46    0.81
   7   6  -2   -0.28    0.73
  -7  -6   2   -0.64    0.68
   6   6  -2    4.93    1.17
  -6  -6   2    7.11    1.41
   5   6  -2   40.73    2.17
   5   6  -2   39.74    1.81
   5   6  -2   41.81    2.48
   5   6  -2   43.56    2.75
  -5  -6   2   40.31    2.44
   4   6  -2   92.24    3.53
   4   6  -2   81.70    3.93
   4   6  -2   88.77    3.84
   4   6  -2   84.68    2.94
   4   6  -2   82.57    3.13
  -4  -6   2   83.25    3.77
  -4  -6   2   88.01    3.50
   3   6  -2   75.85    3.03
   3   6  -2   69.74    3.36
   3   6  -2   78.31    2.85
   3   6  -2   69.78    2.62
   3   6  -2   79.18    3.42
   3   6  -2   75.86    3.55
  -3  -6   2   72.45    3.01
  -3  -6   2   75.40    3.37
  -3  -6   2   68.86    2.87
   2   6  -2  158.08    4.74
   2   6  -2  161.90    5.27
   2   6  -2  158.15    4.45
   2   6  -2  158.48    4.48
   2   6  -2  154.74    5.30
   2   6  -2  158.08    5.48
   2   6  -2  160.13    5.41
  -2  -6   2  156.83    4.84
  -2  -6   2  153.23    4.63
  -2  -6   2  160.22    5.52
  -2  -6   2  160.21    5.31
  -2  -6   2  163.91    5.35
  -2  -6   2  157.69    4.81
  -2  -6   2  156.62    5.13
  -2  -6   2  160.71    5.32
   1   6  -2  216.94    6.77
   1   6  -2  226.25    6.73
   1   6  -2  221.03    5.56
   1   6  -2  219.02    5.73
   1   6  -2  220.42    6.46
   1   6  -2  219.24    6.59
   1   6  -2  222.78    6.62
   1   6  -2  226.41    5.89
   1   6  -2  220.73    6.56
  -1  -6   2  222.28    5.83
  -1  -6   2  229.96    6.01
  -1  -6   2  214.82    6.76
  -1  -6   2  230.78    6.11
  -1  -6   2  217.31    6.47
  -1  -6   2  222.53    6.40
  -1  -6   2  231.26    6.65
  -1  -6   2  207.92    6.44
  -1  -6   2  219.10    6.64
   0   6  -2  144.20    4.80
   0   6  -2  134.44    3.82
   0   6  -2  144.10    4.81
   0   6  -2  138.22    4.52
   0   6  -2  134.65    4.63
   0   6  -2  133.17    4.66
   0   6  -2  142.42    3.97
   0   6  -2  142.59    4.12
   0   6  -2  135.59    4.74
   0  -6   2  127.98    4.52
   0  -6   2  135.79    4.15
   0  -6   2  136.46    4.70
   0  -6   2  140.48    3.96
   0  -6   2  135.89    4.49
   0  -6   2  136.42    4.71
   0  -6   2  138.13    4.66
   0  -6   2  139.25    4.32
   0  -6   2  139.13    4.44
  -1   6  -2   93.92    3.59
  -1   6  -2   95.33    3.08
  -1   6  -2   89.72    2.84
  -1   6  -2   92.14    3.54
  -1   6  -2   90.03    3.34
  -1   6  -2   91.09    3.59
  -1   6  -2   93.67    3.65
  -1   6  -2   90.66    3.41
   1  -6   2   90.61    3.25
   1  -6   2   89.08    3.31
   1  -6   2   94.40    3.39
   1  -6   2   96.96    3.63
   1  -6   2   88.33    3.74
   1  -6   2   92.51    3.31
   1  -6   2   89.69    3.06
   1  -6   2   90.65    3.45
   1  -6   2   95.43    3.65
  -2   6  -2   21.61    1.64
  -2   6  -2   22.38    1.50
  -2   6  -2   21.93    1.22
  -2   6  -2   20.37    1.20
  -2   6  -2   21.84    1.55
  -2   6  -2   17.98    1.34
  -2   6  -2   20.93    1.54
   2  -6   2   20.85    1.42
   2  -6   2   21.74    1.57
   2  -6   2   22.83    1.20
   2  -6   2   21.98    1.44
   2  -6   2   24.54    1.74
   2  -6   2   19.77    1.46
   2  -6   2   20.99    1.45
   2  -6   2   22.68    1.45
   2  -6   2   20.69    1.50
   2  -6   2   20.46    1.46
   2  -6   2   23.81    1.38
  -3   6  -2    7.02    1.07
  -3   6  -2    6.89    0.88
  -3   6  -2    5.44    0.71
  -3   6  -2    6.42    0.94
  -3   6  -2    5.68    0.84
  -3   6  -2    5.59    0.82
  -3   6  -2    6.80    1.02
  -3   6  -2    5.14    0.91
  -3   6  -2    7.38    0.94
  -3   6  -2    7.06    1.10
   3  -6   2    7.51    1.06
   3  -6   2    5.73    0.68
   3  -6   2    5.91    0.89
   3  -6   2    7.03    0.94
   3  -6   2    6.46    0.83
   3  -6   2    7.05    1.10
   3  -6   2    6.19    0.72
   3  -6   2    5.70    0.83
   3  -6   2    7.96    0.93
   3  -6   2    5.28    0.86
   3  -6   2    5.56    0.92
  -4   6  -2   18.44    1.17
  -4   6  -2   17.04    1.14
  -4   6  -2   17.83    1.36
  -4   6  -2   19.65    1.48
  -4   6  -2   19.44    1.32
  -4   6  -2   18.53    1.23
  -4   6  -2   17.01    1.29
  -4   6  -2   16.27    1.30
  -4   6  -2   20.08    1.41
   4  -6   2   18.22    1.14
   4  -6   2   16.94    1.13
   4  -6   2   19.53    1.36
   4  -6   2   17.22    1.32
   4  -6   2   17.00    1.35
   4  -6   2   19.80    1.32
   4  -6   2   18.26    1.48
   4  -6   2   18.02    1.06
   4  -6   2   18.23    1.37
   4  -6   2   18.21    1.40
  -5   6  -2   53.31    2.13
  -5   6  -2   51.16    2.59
  -5   6  -2   53.94    2.23
  -5   6  -2   49.14    2.35
  -5   6  -2   50.78    2.43
  -5   6  -2   48.55    2.35
   5  -6   2   49.41    2.40
   5  -6   2   51.27    1.94
   5  -6   2   54.37    1.72
   5  -6   2   47.16    1.92
   5  -6   2   54.18    2.05
   5  -6   2   51.60    2.42
   5  -6   2   49.01    2.01
   5  -6   2   55.30    2.67
   5  -6   2   52.68    2.29
   5  -6   2   50.71    2.20
  -6   6  -2  120.72    4.26
  -6   6  -2  118.44    3.71
  -6   6  -2  119.83    3.85
   6  -6   2  123.70    4.57
   6  -6   2  119.82    4.30
   6  -6   2  123.03    3.49
   6  -6   2  124.61    3.46
   6  -6   2  123.80    4.01
   6  -6   2  119.01    3.57
   6  -6   2  123.94    3.17
   6  -6   2  121.35    4.25
   6  -6   2  126.75    3.37
   6  -6   2  129.60    3.96
  -7   6  -2  104.25    4.03
  -7   6  -2  105.11    3.68
  -7   6  -2  103.75    3.53
   7  -6   2  109.85    3.79
   7  -6   2  105.58    3.03
   7  -6   2  105.26    4.29
   7  -6   2  107.98    4.16
   7  -6   2   97.27    3.06
   7  -6   2  112.56    4.17
   7  -6   2  105.28    3.45
   7  -6   2  109.26    3.70
   7  -6   2  103.38    3.07
  -8   6  -2   70.54    3.08
  -8   6  -2   69.77    2.93
   8  -6   2   70.81    3.05
   8  -6   2   79.16    3.54
   8  -6   2   73.15    3.13
  -9   6  -2   39.45    2.41
   9  -6   2   43.01    2.45
 -10   6  -2   22.84    2.26
  10  -6   2   19.66    2.07
   8   5  -2   28.34    2.65
   7   5  -2   26.20    2.39
   7   5  -2   25.22    2.35
  -7  -5   2   27.05    2.18
   6   5  -2   49.00    2.41
   6   5  -2   44.96    1.90
   6   5  -2   42.74    2.77
   6   5  -2   48.09    2.64
   6   5  -2   46.83    2.63
  -6  -5   2   49.83    2.69
   5   5  -2   53.58    3.05
   5   5  -2   47.65    2.31
   5   5  -2   52.14    2.15
   5   5  -2   54.67    2.90
   5   5  -2   51.15    2.60
  -5  -5   2   56.71    2.67
  -5  -5   2   53.06    2.84
   4   5  -2   19.96    1.64
   4   5  -2   19.72    2.07
   4   5  -2   18.85    1.89
   4   5  -2   13.29    1.41
   4   5  -2   17.74    1.32
   4   5  -2   18.76    1.22
  -4  -5   2   14.13    1.48
  -4  -5   2   18.00    1.45
  -4  -5   2   18.36    1.57
   3   5  -2   10.00    1.23
   3   5  -2   10.24    1.29
   3   5  -2   10.26    1.05
   3   5  -2   11.87    1.29
   3   5  -2   15.59    1.73
   3   5  -2   11.48    1.51
   3   5  -2   13.83    1.60
   3   5  -2   11.12    0.95
  -3  -5   2   10.61    1.19
  -3  -5   2    9.68    1.23
  -3  -5   2   13.51    1.37
  -3  -5   2   10.13    1.31
  -3  -5   2    9.11    1.22
  -3  -5   2   13.09    1.33
   2   5  -2    7.58    1.04
   2   5  -2    9.40    1.16
   2   5  -2   10.28    1.24
   2   5  -2    7.98    0.89
   2   5  -2   10.47    0.87
   2   5  -2   10.06    1.13
   2   5  -2    8.94    1.24
   2   5  -2    8.29    1.20
  -2  -5   2   10.25    1.26
  -2  -5   2    9.84    1.24
  -2  -5   2    8.44    1.23
  -2  -5   2    8.72    1.11
  -2  -5   2    9.70    1.07
  -2  -5   2    9.91    1.24
  -2  -5   2    8.49    0.95
   1   5  -2    0.65    0.38
   1   5  -2    0.96    0.39
   1   5  -2    1.88    0.60
   1   5  -2    0.94    0.44
   1   5  -2    1.63    0.60
   1   5  -2    1.27    0.55
   1   5  -2    0.39    0.28
   1   5  -2    0.71    0.39
   1   5  -2    1.51    0.57
   1   5  -2    0.57    0.42
  -1  -5   2    0.46    0.39
  -1  -5   2    0.84    0.51
  -1  -5   2    0.81    0.39
  -1  -5   2    0.98    0.45
  -1  -5   2    1.31    0.55
  -1  -5   2    0.55    0.37
  -1  -5   2    0.60    0.28
  -1  -5   2    0.67    0.45
  -1  -5   2    0.77    0.41
  -1  -5   2    0.82    0.33
   0   5  -2    6.69    0.93
   0   5  -2    9.14    0.96
   0   5  -2    5.56    0.81
   0   5  -2   10.74    0.97
   0   5  -2    9.36    0.74
   0   5  -2    6.38    0.82
   0   5  -2    8.98    1.11
   0   5  -2    7.99    1.01
   0   5  -2    9.95    1.24
   0  -5   2   10.34    1.46
   0  -5   2    8.76    0.99
   0  -5   2    7.92    0.97
   0  -5   2   10.51    1.23
   0  -5   2   10.04    1.22
   0  -5   2    8.77    1.03
   0  -5   2   10.12    1.19
   0  -5   2    9.90    0.76
   0  -5   2    5.48    0.82
   0  -5   2    7.65    0.75
   0  -5   2    7.16    0.96
  -1   5  -2  100.04    3.51
  -1   5  -2  108.17    3.70
  -1   5  -2  101.68    3.52
  -1   5  -2   98.17    2.86
  -1   5  -2  101.36    3.38
  -1   5  -2  104.46    3.05
  -1   5  -2  105.33    3.40
  -1   5  -2   96.21    3.52
  -1   5  -2   97.91    2.93
   1  -5   2   98.81    3.20
   1  -5   2   97.54    3.31
   1  -5   2   96.86    2.86
   1  -5   2  100.83    3.43
   1  -5   2   92.90    3.65
   1  -5   2   98.33    3.52
   1  -5   2  101.65    3.30
   1  -5   2  103.28    3.50
   1  -5   2  102.67    3.53
   1  -5   2  102.07    3.06
  -2   5  -2  112.83    3.12
  -2   5  -2  121.00    3.80
  -2   5  -2  104.90    3.64
  -2   5  -2  114.44    3.56
  -2   5  -2  110.75    3.22
  -2   5  -2  119.73    3.65
  -2   5  -2  117.28    3.96
  -2   5  -2  111.10    3.56
  -2   5  -2  117.01    3.73
   2  -5   2  116.79    3.06
   2  -5   2  118.23    3.76
   2  -5   2  116.06    3.25
   2  -5   2  117.53    3.18
   2  -5   2  116.08    3.70
   2  -5   2  119.08    3.70
   2  -5   2  111.21    3.54
   2  -5   2  116.22    3.96
   2  -5   2  110.12    3.47
   2  -5   2  109.49    3.35
   2  -5   2  116.70    3.58
  -3   5  -2  149.00    4.53
  -3   5  -2  156.73    4.57
  -3   5  -2  153.10    4.08
  -3   5  -2  172.79    4.92
  -3   5  -2  161.06    4.00
  -3   5  -2  158.02    4.54
  -3   5  -2  149.67    4.26
  -3   5  -2  166.75    4.65
  -3   5  -2  155.97    4.52
  -3   5  -2  154.45    4.20
   3  -5   2  158.81    4.33
   3  -5   2  164.02    4.59
   3  -5   2  165.60    4.24
   3  -5   2  157.51    4.53
   3  -5   2  159.65    4.06
   3  -5   2  148.26    4.15
   3  -5   2  152.74    3.91
   3  -5   2  172.15    4.97
   3  -5   2  153.64    3.99
   3  -5   2  164.48    4.76
   3  -5   2  159.36    3.90
  -4   5  -2  190.94    5.07
  -4   5  -2  192.12    4.91
  -4   5  -2  196.37    4.80
  -4   5  -2  192.11    5.40
  -4   5  -2  189.05    5.38
  -4   5  -2  200.95    5.49
  -4   5  -2  198.49    5.14
   4  -5   2  203.68    5.52
   4  -5   2  198.29    4.70
   4  -5   2  199.60    5.79
   4  -5   2  194.62    4.95
   4  -5   2  197.24    4.95
   4  -5   2  200.80    5.47
   4  -5   2  194.43    4.85
   4  -5   2  194.57    4.89
   4  -5   2  204.24    5.52
   4  -5   2  199.92    4.40
   4  -5   2  196.69    5.09
  -5   5  -2  133.05    4.50
  -5   5  -2  129.49    3.96
  -5   5  -2  134.72    4.26
  -5   5  -2  129.03    4.19
  -5   5  -2  134.11    3.72
  -5   5  -2  136.63    4.19
  -5   5  -2  136.40    3.86
   5  -5   2  142.22    4.34
   5  -5   2  137.60    3.52
   5  -5   2  139.23    4.31
   5  -5   2  131.35    3.66
   5  -5   2  135.00    3.59
   5  -5   2  140.01    4.29
   5  -5   2  136.84    3.24
   5  -5   2  134.90    3.85
   5  -5   2  134.40    3.47
   5  -5   2  135.00    4.49
   5  -5   2  135.36    3.97
  -6   5  -2  115.67    3.52
  -6   5  -2  124.73    3.87
  -6   5  -2  121.80    4.06
  -6   5  -2  121.97    3.70
  -6   5  -2  110.76    4.21
   6  -5   2  113.87    3.68
   6  -5   2  117.63    4.10
   6  -5   2  117.67    3.00
   6  -5   2  117.37    3.21
   6  -5   2  114.31    4.21
   6  -5   2  114.66    3.27
   6  -5   2  119.36    3.06
   6  -5   2  117.27    4.02
   6  -5   2  116.90    4.09
   6  -5   2  118.26    3.44
   6  -5   2  119.32    3.64
   6  -5   2  117.28    3.13
  -7   5  -2   25.28    1.63
  -7   5  -2   24.20    1.52
  -7   5  -2   21.37    1.67
   7  -5   2   23.66    1.78
   7  -5   2   21.80    1.51
   7  -5   2   26.28    1.92
   7  -5   2   24.46    1.45
   7  -5   2   22.13    1.23
   7  -5   2   22.78    1.55
   7  -5   2   26.38    1.21
   7  -5   2   23.04    1.56
   7  -5   2   23.84    1.76
  -8   5  -2    2.90    0.88
  -8   5  -2    2.19    0.67
  -8   5  -2    1.82    0.71
   8  -5   2    2.69    0.76
   8  -5   2    3.09    0.92
   8  -5   2    2.06    0.84
  -9   5  -2    3.73    0.99
   9  -5   2    3.38    1.00
   9  -5   2    5.04    1.07
 -10   5  -2   13.76    1.75
  10  -5   2    9.96    1.53
   8   4  -2    2.14    0.94
   8   4  -2    4.58    1.14
  -8  -4   2    3.10    1.07
   7   4  -2    1.40    0.80
   7   4  -2    1.41    0.49
   7   4  -2    1.38    0.74
  -7  -4   2    0.78    0.71
   6   4  -2    9.76    1.21
   6   4  -2   11.99    1.48
   6   4  -2   11.73    1.03
   6   4  -2   13.78    1.63
   6   4  -2   14.40    1.72
  -6  -4   2   11.60    1.44
   5   4  -2   25.96    1.60
   5   4  -2   24.02    1.84
   5   4  -2   23.84    1.92
   5   4  -2   23.91    1.40
   5   4  -2   23.22    1.77
   5   4  -2   23.18    1.65
  -5  -4   2   25.36    1.66
  -5  -4   2   22.43    0.88
  -5  -4   2   22.65    1.74
   4   4  -2   88.36    3.14
   4   4  -2   84.63    3.60
   4   4  -2   89.63    3.42
   4   4  -2   89.31    3.48
   4   4  -2   87.73    3.43
   4   4  -2   83.81    3.41
   4   4  -2   83.93    2.92
   4   4  -2   81.35    2.85
  -4  -4   2   86.12    3.61
  -4  -4   2   83.49    3.32
  -4  -4   2   87.01    3.13
  -4  -4   2   91.93    3.53
  -4  -4   2   86.82    3.47
  -4  -4   2   92.05    3.11
  -4  -4   2   85.01    3.45
   3   4  -2  162.61    5.02
   3   4  -2  162.85    4.36
   3   4  -2  167.23    4.99
   3   4  -2  165.61    5.27
   3   4  -2  163.89    4.53
   3   4  -2  160.53    4.46
   3   4  -2  167.79    4.96
  -3  -4   2  164.42    4.92
  -3  -4   2  166.18    4.48
  -3  -4   2  161.72    5.03
  -3  -4   2  164.21    4.63
  -3  -4   2  158.78    5.22
  -3  -4   2  173.28    5.15
  -3  -4   2  166.53    5.07
   2   4  -2  104.75    3.42
   2   4  -2  107.75    3.70
   2   4  -2  103.52    3.08
   2   4  -2  105.22    3.54
   2   4  -2   99.66    3.36
   2   4  -2  103.16    3.02
   2   4  -2  107.46    3.18
   2   4  -2  102.93    3.50
   2   4  -2  100.89    3.45
  -2  -4   2  102.28    3.44
  -2  -4   2  101.81    3.13
  -2  -4   2  103.85    3.45
  -2  -4   2  100.12    2.98
  -2  -4   2  105.88    3.69
  -2  -4   2  106.00    3.59
  -2  -4   2   95.75    3.41
  -2  -4   2  106.14    3.14
   1   4  -2  167.74    4.33
   1   4  -2  174.15    4.89
   1   4  -2  167.19    5.00
   1   4  -2  170.72    4.82
   1   4  -2  168.14    4.79
   1   4  -2  176.55    4.86
   1   4  -2  170.07    4.18
   1   4  -2  170.05    4.88
   1   4  -2  169.25    4.37
  -1  -4   2  171.85    4.37
  -1  -4   2  171.21    4.87
  -1  -4   2  169.04    4.83
  -1  -4   2  169.40    4.84
  -1  -4   2  164.63    4.99
  -1  -4   2  170.66    4.82
  -1  -4   2  165.87    4.13
  -1  -4   2  159.90    4.32
  -1  -4   2  173.74    4.46
   0   4  -2  143.58    3.75
   0   4  -2  145.39    3.77
   0   4  -2  141.35    4.15
   0   4  -2  142.82    4.31
   0   4  -2  146.44    4.38
   0   4  -2  146.23    4.26
   0   4  -2  146.55    4.36
   0   4  -2  142.76    4.29
   0   4  -2  144.90    3.59
   0  -4   2  143.95    4.13
   0  -4   2  146.92    4.35
   0  -4   2  140.51    3.78
   0  -4   2  152.69    4.64
   0  -4   2  149.17    4.33
   0  -4   2  137.48    3.50
   0  -4   2  140.11    4.10
   0  -4   2  140.48    4.20
   0  -4   2  145.32    3.94
  -1   4  -2   83.49    2.34
  -1   4  -2   82.26    2.44
  -1   4  -2   78.59    2.81
  -1   4  -2   80.31    2.39
  -1   4  -2   83.84    2.44
  -1   4  -2   85.05    2.89
  -1   4  -2   84.56    2.86
  -1   4  -2   82.91    2.72
  -1   4  -2   83.04    2.73
  -1   4  -2   81.57    2.81
   1  -4   2   81.06    2.75
   1  -4   2   82.62    2.45
   1  -4   2   82.90    3.01
   1  -4   2   83.19    2.89
   1  -4   2   80.10    2.63
   1  -4   2   79.46    2.64
   1  -4   2   85.21    2.35
   1  -4   2   84.68    2.83
   1  -4   2   78.29    2.24
   1  -4   2   81.28    2.79
   1  -4   2   81.78    2.57
  -2   4  -2   40.93    1.69
  -2   4  -2   43.77    1.75
  -2   4  -2   43.37    1.50
  -2   4  -2   41.34    1.47
  -2   4  -2   41.44    1.70
  -2   4  -2   44.89    1.87
  -2   4  -2   39.12    1.59
  -2   4  -2   42.14    1.74
  -2   4  -2   43.21    1.75
  -2   4  -2   40.67    1.49
   2  -4   2   44.45    1.46
   2  -4   2   41.16    1.74
   2  -4   2   42.37    1.87
   2  -4   2   39.04    1.73
   2  -4   2   41.03    1.72
   2  -4   2   40.95    1.51
   2  -4   2   39.65    1.67
   2  -4   2   40.68    1.50
   2  -4   2   43.63    1.61
   2  -4   2   39.82    1.61
   2  -4   2   40.15    1.42
   2  -4   2   41.35    1.49
   2  -4   2   42.62    1.69
  -3   4  -2   15.44    1.00
  -3   4  -2   16.30    0.89
  -3   4  -2   13.11    0.93
  -3   4  -2   13.68    0.94
  -3   4  -2   14.89    0.89
  -3   4  -2   13.49    0.88
  -3   4  -2   15.11    0.96
  -3   4  -2   16.35    0.88
  -3   4  -2   13.16    0.74
  -3   4  -2   15.37    1.04
   3  -4   2   15.53    1.02
   3  -4   2   16.18    1.02
   3  -4   2   12.79    0.92
   3  -4   2   13.87    0.77
   3  -4   2   14.37    0.80
   3  -4   2   15.03    0.90
   3  -4   2   14.32    0.92
   3  -4   2   13.96    0.79
   3  -4   2   13.42    0.97
   3  -4   2   14.46    0.80
   3  -4   2   15.92    1.07
  -4   4  -2   11.55    0.97
  -4   4  -2   11.23    0.82
  -4   4  -2   11.34    0.55
  -4   4  -2    9.96    0.80
  -4   4  -2   10.73    0.79
  -4   4  -2   11.88    0.94
  -4   4  -2   11.74    0.87
  -4   4  -2    9.94    0.85
  -4   4  -2    9.65    0.80
  -4   4  -2   10.12    0.78
   4  -4   2   11.11    0.94
   4  -4   2   10.33    0.91
   4  -4   2    9.83    0.69
   4  -4   2   11.11    0.68
   4  -4   2    9.74    0.91
   4  -4   2   11.64    0.96
   4  -4   2   11.13    0.68
   4  -4   2   10.93    0.54
   4  -4   2    9.99    0.71
   4  -4   2   10.97    0.71
   4  -4   2   11.59    0.94
   4  -4   2    9.04    0.85
   4  -4   2   10.94    0.83
  -5   4  -2   29.68    1.55
  -5   4  -2   30.84    1.50
  -5   4  -2   33.43    1.59
  -5   4  -2   34.73    1.73
  -5   4  -2   32.97    1.70
  -5   4  -2   32.46    1.46
  -5   4  -2   32.94    1.52
  -5   4  -2   31.52    1.77
   5  -4   2   33.34    1.55
   5  -4   2   32.50    1.41
   5  -4   2   32.44    1.22
   5  -4   2   32.92    1.73
   5  -4   2   32.37    1.20
   5  -4   2   30.77    1.73
   5  -4   2   30.75    1.12
   5  -4   2   31.17    1.23
   5  -4   2   32.87    1.72
   5  -4   2   34.31    1.74
   5  -4   2   32.18    1.50
   5  -4   2   33.13    1.70
   5  -4   2   32.65    1.29
  -6   4  -2   36.17    1.77
  -6   4  -2   36.94    1.80
  -6   4  -2   36.02    2.05
  -6   4  -2   34.07    1.65
  -6   4  -2   38.82    1.99
   6  -4   2   36.38    1.37
   6  -4   2   39.32    2.01
   6  -4   2   34.84    2.00
   6  -4   2   35.30    1.30
   6  -4   2   36.48    1.26
   6  -4   2   35.13    1.33
   6  -4   2   37.92    1.78
   6  -4   2   35.60    1.29
   6  -4   2   36.21    1.71
   6  -4   2   35.63    1.59
   6  -4   2   37.15    1.98
   6  -4   2   37.98    1.77
   6  -4   2   32.48    1.89
  -7   4  -2   71.52    2.71
  -7   4  -2   81.45    3.27
  -7   4  -2   78.99    2.94
   7  -4   2   79.90    3.29
   7  -4   2   74.14    2.79
   7  -4   2   77.46    2.14
   7  -4   2   77.71    2.39
   7  -4   2   77.79    3.22
   7  -4   2   77.84    2.65
   7  -4   2   74.31    3.30
  -8   4  -2   82.76    3.16
  -8   4  -2   87.10    3.34
  -8   4  -2   86.81    3.71
   8  -4   2   85.67    3.25
   8  -4   2   92.16    3.93
   8  -4   2   85.27    3.71
   8  -4   2   95.32    3.83
  -9   4  -2   89.27    3.66
   9  -4   2   94.23    3.60
   9  -4   2   93.82    4.09
 -10   4  -2   31.79    2.30
   9   3  -2   31.89    2.50
   8   3  -2   71.68    3.21
   8   3  -2   74.63    3.51
  -8  -3   2   79.26    3.54
   7   3  -2   94.55    3.62
   7   3  -2  108.21    4.34
   7   3  -2  100.39    3.22
   7   3  -2  103.62    3.93
   7   3  -2   95.71    3.53
  -7  -3   2   99.60    3.82
   6   3  -2   69.24    3.17
   6   3  -2   71.22    2.77
   6   3  -2   71.81    2.98
   6   3  -2   69.64    2.83
   6   3  -2   71.78    3.47
   6   3  -2   66.99    2.55
   6   3  -2   67.44    3.29
  -6  -3   2   70.12    2.89
  -6  -3   2   70.02    3.19
   5   3  -2   41.99    2.23
   5   3  -2   43.42    2.29
   5   3  -2   42.28    2.09
   5   3  -2   41.85    1.86
   5   3  -2   40.86    2.39
   5   3  -2   40.53    2.50
   5   3  -2   44.87    2.00
   5   3  -2   45.09    2.37
  -5  -3   2   41.12    2.20
  -5  -3   2   43.22    2.05
  -5  -3   2   41.26    2.39
  -5  -3   2   41.98    2.07
   4   3  -2   30.91    1.79
   4   3  -2   33.28    1.56
   4   3  -2   32.95    1.59
   4   3  -2   35.16    1.84
   4   3  -2   34.81    1.99
   4   3  -2   29.74    1.75
   4   3  -2   31.75    1.83
   4   3  -2   31.36    1.66
  -4  -3   2   30.56    1.81
  -4  -3   2   33.19    1.69
  -4  -3   2   34.68    1.97
  -4  -3   2   33.63    1.79
  -4  -3   2   30.58    1.58
   3   3  -2    1.37    0.38
   3   3  -2    1.87    0.54
   3   3  -2    1.30    0.42
   3   3  -2    1.49    0.49
   3   3  -2    1.73    0.46
   3   3  -2    1.09    0.38
   3   3  -2    1.46    0.39
   3   3  -2    0.99    0.40
  -3  -3   2    1.65    0.23
  -3  -3   2    1.12    0.43
  -3  -3   2    1.40    0.49
  -3  -3   2    2.17    0.53
  -3  -3   2    0.64    0.39
  -3  -3   2    1.81    0.50
  -3  -3   2    1.80    0.45
  -3  -3   2    1.00    0.46
  -3  -3   2    1.35    0.40
   2   3  -2    9.18    1.01
   2   3  -2    7.95    0.86
   2   3  -2    8.76    0.70
   2   3  -2   10.80    0.82
   2   3  -2    8.62    0.70
   2   3  -2   10.15    0.91
   2   3  -2    7.76    0.82
   2   3  -2    9.42    0.81
  -2  -3   2   10.09    1.11
  -2  -3   2    9.51    0.84
  -2  -3   2    8.10    0.80
  -2  -3   2    7.60    0.83
  -2  -3   2    9.86    0.72
  -2  -3   2    8.55    0.71
  -2  -3   2    7.47    0.84
  -2  -3   2    6.96    0.78
  -2  -3   2    7.53    0.86
   1   3  -2    4.36    0.51
   1   3  -2    4.69    0.61
   1   3  -2    4.07    0.60
   1   3  -2    5.76    0.77
   1   3  -2    5.42    0.65
   1   3  -2    3.27    0.53
   1   3  -2    3.49    0.45
   1   3  -2    5.18    0.73
   1   3  -2    4.20    0.57
   1   3  -2    4.05    0.60
  -1  -3   2    5.48    0.73
  -1  -3   2    4.50    0.63
  -1  -3   2    4.13    0.55
  -1  -3   2    6.12    0.76
  -1  -3   2    5.50    0.70
  -1  -3   2    3.45    0.55
  -1  -3   2    4.41    0.58
  -1  -3   2    2.57    0.47
  -1  -3   2    4.26    0.59
   0   3  -2   50.74    1.61
   0   3  -2   50.90    1.97
   0   3  -2   53.08    1.99
   0   3  -2   50.42    1.90
   0   3  -2   51.20    1.97
   0   3  -2   54.17    1.89
   0   3  -2   54.40    1.72
   0   3  -2   52.00    1.68
   0  -3   2   49.08    1.91
   0  -3   2   51.63    1.90
   0  -3   2   55.35    2.00
   0  -3   2   52.10    1.94
   0  -3   2   50.78    1.70
   0  -3   2   51.24    1.54
   0  -3   2   54.77    1.88
   0  -3   2   42.34    1.85
   0  -3   2   53.68    1.83
   0  -3   2   50.03    1.57
   0  -3   2   50.33    1.64
  -1   3  -2   47.50    1.65
  -1   3  -2   45.34    1.71
  -1   3  -2   46.86    1.83
  -1   3  -2   47.99    1.76
  -1   3  -2   47.86    1.48
  -1   3  -2   48.90    1.54
  -1   3  -2   47.01    1.50
  -1   3  -2   45.85    1.69
  -1   3  -2   45.49    1.55
  -1   3  -2   48.53    1.78
  -1   3  -2   44.99    1.66
  -1   3  -2   47.21    1.45
  -1   3  -2   49.51    1.72
   1  -3   2   50.51    1.43
   1  -3   2   48.27    1.84
   1  -3   2   46.88    1.75
   1  -3   2   46.39    1.61
   1  -3   2   45.32    1.64
   1  -3   2   45.69    1.50
   1  -3   2   46.90    1.65
   1  -3   2   47.56    1.41
   1  -3   2   46.17    1.70
   1  -3   2   48.04    1.74
   1  -3   2   45.28    1.70
   1  -3   2   47.15    1.74
  -2   3  -2   27.15    1.10
  -2   3  -2   28.13    0.99
  -2   3  -2   27.61    1.04
  -2   3  -2   26.61    1.06
  -2   3  -2   29.42    1.21
  -2   3  -2   26.49    1.13
  -2   3  -2   28.76    1.07
  -2   3  -2   26.68    1.23
  -2   3  -2   27.19    1.18
  -2   3  -2   29.16    1.21
   2  -3   2   28.52    1.08
   2  -3   2   27.44    0.98
   2  -3   2   30.37    1.24
   2  -3   2   30.26    1.00
   2  -3   2   28.56    1.17
   2  -3   2   26.68    1.18
   2  -3   2   27.28    0.97
   2  -3   2   26.70    1.16
   2  -3   2   28.15    1.19
   2  -3   2   27.89    1.24
   2  -3   2   29.43    1.12
   2  -3   2   29.39    1.01
   2  -3   2   27.55    1.24
   2  -3   2   27.38    1.02
  -3   3  -2   50.43    1.66
  -3   3  -2   54.21    1.83
  -3   3  -2   54.25    1.46
  -3   3  -2   52.78    1.53
  -3   3  -2   55.50    2.02
  -3   3  -2   57.09    1.76
  -3   3  -2   55.27    1.90
  -3   3  -2   54.75    1.78
  -3   3  -2   56.57    1.74
  -3   3  -2   54.47    1.67
  -3   3  -2   54.74    1.72
  -3   3  -2   50.94    1.86
   3  -3   2   55.80    1.60
   3  -3   2   54.39    1.57
   3  -3   2   55.19    1.93
   3  -3   2   54.22    1.99
   3  -3   2   58.35    1.94
   3  -3   2   55.96    1.52
   3  -3   2   56.93    1.95
   3  -3   2   52.83    1.64
   3  -3   2   53.56    1.90
   3  -3   2   55.60    1.74
   3  -3   2   53.32    1.68
   3  -3   2   54.81    1.58
   3  -3   2   56.45    1.32
  -4   3  -2  185.63    4.23
  -4   3  -2  182.93    4.51
  -4   3  -2  181.09    5.02
  -4   3  -2  178.88    4.75
  -4   3  -2  177.35    4.74
  -4   3  -2  183.75    4.26
  -4   3  -2  179.21    4.46
  -4   3  -2  178.88    4.30
  -4   3  -2  177.73    4.68
   4  -3   2  174.46    4.95
   4  -3   2  181.62    4.80
   4  -3   2  176.82    4.16
   4  -3   2  184.03    4.14
   4  -3   2  182.60    4.27
   4  -3   2  181.81    4.79
   4  -3   2  176.11    4.11
   4  -3   2  172.95    4.02
   4  -3   2  175.47    3.85
   4  -3   2  181.33    3.91
   4  -3   2  180.69    4.80
   4  -3   2  176.56    4.38
   4  -3   2  182.78    4.83
   4  -3   2  178.83    4.05
   4  -3   2  183.83    4.15
  -5   3  -2  149.52    4.01
  -5   3  -2  156.56    4.17
  -5   3  -2  155.07    4.33
  -5   3  -2  154.91    4.44
  -5   3  -2  152.70    3.47
  -5   3  -2  152.54    4.68
  -5   3  -2  156.76    4.46
  -5   3  -2  156.48    4.19
  -5   3  -2  152.50    3.89
   5  -3   2  156.19    3.76
   5  -3   2  155.16    4.47
   5  -3   2  149.66    3.95
   5  -3   2  152.31    3.39
   5  -3   2  154.94    4.65
   5  -3   2  152.94    3.95
   5  -3   2  160.38    4.53
   5  -3   2  142.41    3.63
   5  -3   2  159.17    4.52
   5  -3   2  153.44    3.79
   5  -3   2  151.85    3.64
   5  -3   2  156.38    4.51
   5  -3   2  156.65    3.67
  -6   3  -2  136.16    4.34
  -6   3  -2  138.25    4.62
  -6   3  -2  141.15    4.59
  -6   3  -2  136.60    3.94
  -6   3  -2  135.78    3.79
  -6   3  -2  139.44    3.36
  -6   3  -2  139.38    4.10
   6  -3   2  147.26    4.48
   6  -3   2  133.62    4.35
   6  -3   2  141.05    3.82
   6  -3   2  139.49    3.68
   6  -3   2  143.53    3.61
   6  -3   2  140.84    4.34
   6  -3   2  136.90    3.87
   6  -3   2  135.73    3.65
   6  -3   2  137.70    3.15
   6  -3   2  139.44    4.56
   6  -3   2  140.25    4.38
  -7   3  -2   54.25    2.56
  -7   3  -2   49.48    2.14
  -7   3  -2   49.82    2.24
   7  -3   2   49.81    2.19
   7  -3   2   50.51    2.50
   7  -3   2   46.71    2.01
   7  -3   2   47.60    1.95
   7  -3   2   53.78    2.03
   7  -3   2   48.64    1.47
   7  -3   2   48.96    2.49
   7  -3   2   50.02    2.57
  -8   3  -2   32.11    1.95
  -8   3  -2   28.44    1.75
  -8   3  -2   29.86    2.07
   8  -3   2   28.86    1.67
   8  -3   2   31.88    2.12
   8  -3   2   30.74    2.17
   8  -3   2   28.13    1.81
   8  -3   2   32.94    2.22
  -9   3  -2    8.63    1.36
   9  -3   2    8.01    1.35
   9  -3   2    9.19    1.54
   9  -3   2    5.47    1.04
 -10   3  -2   10.76    1.61
   9   2  -2   51.72    2.95
  -9  -2   2   40.90    2.72
   8   2  -2   24.58    2.22
   8   2  -2   23.55    1.27
   8   2  -2   21.72    1.66
   8   2  -2   21.56    1.29
  -8  -2   2   26.69    2.03
   7   2  -2    0.45    0.50
   7   2  -2    0.79    0.59
   7   2  -2    0.99    0.67
   7   2  -2    0.56    0.46
   7   2  -2    1.33    0.60
  -7  -2   2    0.97    0.62
   6   2  -2    8.64    1.13
   6   2  -2    7.55    1.06
   6   2  -2   11.29    1.54
   6   2  -2   10.60    1.19
   6   2  -2    7.66    1.00
   6   2  -2    8.87    1.22
   6   2  -2    8.39    1.04
  -6  -2   2   10.59    1.25
  -6  -2   2   10.61    1.36
   5   2  -2   46.91    2.07
   5   2  -2   46.15    2.39
   5   2  -2   48.02    2.01
   5   2  -2   47.83    2.31
   5   2  -2   46.18    1.95
   5   2  -2   47.36    2.24
   5   2  -2   47.12    2.27
   5   2  -2   48.95    1.99
   5   2  -2   47.01    2.31
  -5  -2   2   46.00    2.29
  -5  -2   2   48.00    2.26
  -5  -2   2   45.16    2.39
  -5  -2   2   49.26    2.15
  -5  -2   2   46.68    2.32
  -5  -2   2   48.60    2.06
   4   2  -2  121.81    3.58
   4   2  -2  130.46    3.62
   4   2  -2  126.44    4.15
   4   2  -2  129.82    3.92
   4   2  -2  122.79    3.90
   4   2  -2  128.70    3.99
   4   2  -2  129.61    3.52
  -4  -2   2  122.17    3.51
  -4  -2   2  126.30    3.89
  -4  -2   2  125.64    4.17
  -4  -2   2  127.21    3.92
  -4  -2   2  124.70    3.72
  -4  -2   2  127.88    4.01
  -4  -2   2  128.67    3.98
   3   2  -2  338.66    8.01
   3   2  -2  332.63    7.17
   3   2  -2  336.10    8.40
   3   2  -2  332.37    7.02
   3   2  -2  331.24    8.02
   3   2  -2  323.77    7.99
   3   2  -2  318.75    7.87
   3   2  -2  341.44    7.78
   3   2  -2  332.40    7.67
   3   2  -2  334.21    8.02
   3   2  -2  335.53    7.26
  -3  -2   2  326.74    7.94
  -3  -2   2  333.03    8.03
  -3  -2   2  330.01    8.39
  -3  -2   2  329.16    7.19
  -3  -2   2  339.83    7.74
  -3  -2   2  328.30    7.94
  -3  -2   2  332.98    8.03
  -3  -2   2  336.94    7.17
   2   2  -2  177.12    4.55
   2   2  -2  177.38    4.60
   2   2  -2  178.59    4.60
   2   2  -2  173.42    4.47
   2   2  -2  185.56    4.66
   2   2  -2  184.56    4.41
   2   2  -2  178.92    4.65
   2   2  -2  182.63    4.21
   2   2  -2  177.27    4.12
   2   2  -2  179.74    4.85
  -2  -2   2  185.86    4.63
  -2  -2   2  175.90    4.44
  -2  -2   2  184.29    4.59
  -2  -2   2  180.44    4.14
  -2  -2   2  179.31    4.63
  -2  -2   2  182.31    4.12
  -2  -2   2  183.24    4.42
  -2  -2   2  175.62    3.83
  -2  -2   2  184.82    4.66
   1   2  -2  198.97    4.75
   1   2  -2  196.41    4.21
   1   2  -2  192.54    4.27
   1   2  -2  200.52    4.97
   1   2  -2  197.85    4.50
   1   2  -2  199.65    4.72
   1   2  -2  195.82    4.53
   1   2  -2  191.91    4.01
   1   2  -2  197.35    4.73
   1   2  -2  190.56    4.70
   1   2  -2  191.67    4.72
   1   2  -2  190.47    4.36
  -1  -2   2  195.43    4.18
  -1  -2   2  196.63    4.27
  -1  -2   2  192.70    4.70
  -1  -2   2  196.35    4.26
  -1  -2   2  195.42    4.75
  -1  -2   2  191.92    4.74
  -1  -2   2  188.66    4.70
  -1  -2   2  192.68    4.71
  -1  -2   2  191.72    4.71
   0   2  -2   12.08    0.75
   0   2  -2   12.42    0.62
   0   2  -2   10.81    0.68
   0   2  -2   11.95    0.57
   0   2  -2   11.48    0.74
   0   2  -2   12.04    0.68
   0   2  -2   12.81    0.65
   0   2  -2   11.24    0.67
   0   2  -2   11.55    0.71
   0   2  -2   12.22    0.75
   0   2  -2   12.38    0.62
   0   2  -2   11.87    0.56
   0  -2   2   13.61    0.68
   0  -2   2   12.21    0.75
   0  -2   2   11.25    0.59
   0  -2   2   11.23    0.54
   0  -2   2   11.66    0.70
   0  -2   2   12.52    0.76
   0  -2   2   12.68    0.74
   0  -2   2   12.54    0.61
   0  -2   2   12.91    0.55
   0  -2   2   12.98    0.72
   0  -2   2   12.13    0.76
   0  -2   2   12.84    0.69
  -1   2  -2   59.49    1.51
  -1   2  -2   60.62    1.78
  -1   2  -2   57.84    1.53
  -1   2  -2   60.15    1.66
  -1   2  -2   58.85    1.70
  -1   2  -2   59.27    1.51
  -1   2  -2   56.50    1.69
  -1   2  -2   54.86    1.66
  -1   2  -2   59.33    1.49
  -1   2  -2   58.74    1.69
  -1   2  -2   55.80    1.50
  -1   2  -2   57.75    1.48
  -1   2  -2   57.22    1.62
  -1   2  -2   58.69    1.56
  -1   2  -2   56.79    1.76
   1  -2   2   60.75    1.78
   1  -2   2   58.15    1.69
   1  -2   2   57.96    1.76
   1  -2   2   59.67    1.38
   1  -2   2   58.40    1.53
   1  -2   2   61.07    1.55
   1  -2   2   60.43    1.40
   1  -2   2   59.03    1.71
   1  -2   2   58.14    1.51
   1  -2   2   58.80    1.71
   1  -2   2   57.03    1.37
   1  -2   2   61.06    1.51
   1  -2   2   61.36    1.70
   1  -2   2   57.52    1.42
   1  -2   2   58.27    1.66
  -2   2  -2   31.98    1.06
  -2   2  -2   32.17    1.00
  -2   2  -2   32.77    0.87
  -2   2  -2   29.28    1.06
  -2   2  -2   31.53    1.14
  -2   2  -2   32.99    1.03
  -2   2  -2   30.95    1.08
  -2   2  -2   32.80    1.04
  -2   2  -2   33.24    0.94
  -2   2  -2   31.08    0.99
  -2   2  -2   35.13    1.25
  -2   2  -2   32.51    1.15
  -2   2  -2   35.28    1.19
   2  -2   2   31.60    1.12
   2  -2   2   34.15    1.19
   2  -2   2   29.81    1.13
   2  -2   2   32.70    1.02
   2  -2   2   32.35    1.17
   2  -2   2   32.99    1.02
   2  -2   2   33.94    1.22
   2  -2   2   31.30    1.03
   2  -2   2   32.97    0.92
   2  -2   2   32.49    1.08
   2  -2   2   33.72    0.97
  -3   2  -2    0.29    0.21
  -3   2  -2    0.34    0.18
  -3   2  -2    0.10    0.15
  -3   2  -2    0.24    0.22
  -3   2  -2   -0.05    0.17
  -3   2  -2    0.36    0.20
  -3   2  -2    0.43    0.19
  -3   2  -2    0.62    0.24
  -3   2  -2    0.45    0.24
  -3   2  -2    0.64    0.23
  -3   2  -2    0.45    0.21
  -3   2  -2    0.25    0.11
  -3   2  -2    0.46    0.19
   3  -2   2    0.24    0.21
   3  -2   2    0.30    0.18
   3  -2   2    0.29    0.18
   3  -2   2    0.12    0.20
   3  -2   2    0.52    0.26
   3  -2   2    0.43    0.19
   3  -2   2    0.18    0.14
   3  -2   2    0.45    0.24
   3  -2   2    0.65    0.26
   3  -2   2    0.59    0.16
   3  -2   2   -0.06    0.09
   3  -2   2    0.30    0.13
   3  -2   2    0.24    0.19
   3  -2   2    0.30    0.20
  -4   2  -2    5.79    0.58
  -4   2  -2    5.89    0.77
  -4   2  -2    5.64    0.67
  -4   2  -2    6.33    0.49
  -4   2  -2    5.07    0.60
  -4   2  -2    4.52    0.57
  -4   2  -2    5.75    0.41
  -4   2  -2    6.88    0.78
  -4   2  -2    6.57    0.71
  -4   2  -2    5.15    0.56
   4  -2   2    6.67    0.54
   4  -2   2    7.37    0.69
   4  -2   2    5.13    0.64
   4  -2   2    6.61    0.72
   4  -2   2    5.30    0.54
   4  -2   2    6.08    0.72
   4  -2   2    6.66    0.77
   4  -2   2    6.44    0.65
   4  -2   2    6.26    0.74
   4  -2   2    6.35    0.78
   4  -2   2    5.44    0.61
   4  -2   2    5.64    0.51
   4  -2   2    6.09    0.35
   4  -2   2    6.27    0.48
  -5   2  -2   11.68    0.97
  -5   2  -2   11.22    0.95
  -5   2  -2   10.64    0.86
  -5   2  -2   11.44    0.99
  -5   2  -2   12.32    0.68
  -5   2  -2   11.31    0.87
  -5   2  -2   11.53    0.82
  -5   2  -2   11.65    0.86
  -5   2  -2   12.93    0.93
  -5   2  -2   10.08    0.65
   5  -2   2   11.29    0.97
   5  -2   2   12.41    1.03
   5  -2   2   11.44    0.52
   5  -2   2   12.45    0.98
   5  -2   2    8.81    0.95
   5  -2   2   12.78    0.88
   5  -2   2   10.50    0.84
   5  -2   2   12.96    0.74
   5  -2   2   10.74    0.77
   5  -2   2   13.53    0.87
   5  -2   2   12.55    0.97
   5  -2   2    9.40    0.98
  -6   2  -2   24.03    1.33
  -6   2  -2   25.42    1.57
  -6   2  -2   23.89    1.08
  -6   2  -2   23.40    1.39
  -6   2  -2   24.96    1.42
   6  -2   2   25.27    1.25
   6  -2   2   24.59    1.37
   6  -2   2   25.00    1.60
   6  -2   2   24.37    1.33
   6  -2   2   21.88    1.49
   6  -2   2   25.19    1.64
   6  -2   2   26.96    1.62
   6  -2   2   22.74    1.28
   6  -2   2   24.89    0.87
  -7   2  -2   44.88    2.14
  -7   2  -2   50.96    2.13
  -7   2  -2   47.01    2.42
   7  -2   2   47.77    2.12
   7  -2   2   47.91    2.50
   7  -2   2   51.20    2.55
   7  -2   2   49.67    1.93
   7  -2   2   48.25    2.08
   7  -2   2   46.32    2.10
   7  -2   2   50.08    2.46
  -8   2  -2   28.55    1.76
  -8   2  -2   28.96    2.05
  -8   2  -2   26.22    1.78
   8  -2   2   24.87    1.70
   8  -2   2   31.19    1.83
   8  -2   2   26.69    2.02
   8  -2   2   28.31    2.08
   8  -2   2   28.29    2.05
   8  -2   2   27.09    1.64
  -9   2  -2   29.92    2.10
   9  -2   2   33.57    2.11
   9  -2   2   33.19    2.38
   9  -2   2   27.56    2.30
 -10   2  -2   44.89    2.74
   9   1  -2   18.87    2.07
  -9  -1   2   21.33    2.09
   8   1  -2   43.09    1.96
   8   1  -2   42.60    2.11
   8   1  -2   48.10    1.93
   8   1  -2   45.96    2.52
   8   1  -2   43.41    2.29
  -8  -1   2   47.17    2.55
   7   1  -2   72.47    3.22
   7   1  -2   69.43    2.91
   7   1  -2   73.44    3.64
   7   1  -2   73.10    2.63
   7   1  -2   71.26    2.79
   7   1  -2   64.96    2.58
  -7  -1   2   69.90    3.20
  -7  -1   2   66.57    2.86
   6   1  -2  133.61    3.84
   6   1  -2  126.94    4.34
   6   1  -2  127.03    4.29
   6   1  -2  125.07    3.59
   6   1  -2  120.05    4.48
   6   1  -2  124.34    4.20
   6   1  -2  122.68    3.87
   6   1  -2  118.92    3.74
  -6  -1   2  122.70    4.03
  -6  -1   2  125.82    4.27
  -6  -1   2  117.59    3.77
   5   1  -2   81.63    2.77
   5   1  -2   82.95    2.55
   5   1  -2   80.45    3.00
   5   1  -2   82.44    3.04
   5   1  -2   85.64    2.73
   5   1  -2   78.97    3.02
   5   1  -2   83.46    3.07
   5   1  -2   78.75    3.17
   5   1  -2   82.07    2.73
  -5  -1   2   79.15    3.19
  -5  -1   2   83.77    2.88
  -5  -1   2   82.18    2.74
  -5  -1   2   84.08    3.04
  -5  -1   2   81.56    3.08
   4   1  -2  109.51    3.59
   4   1  -2  112.65    3.43
   4   1  -2  109.08    3.44
   4   1  -2  104.24    2.88
   4   1  -2  108.63    3.18
   4   1  -2  105.24    3.41
   4   1  -2  109.50    3.42
   4   1  -2  111.46    3.40
   4   1  -2  110.22    3.12
   4   1  -2  111.11    3.06
  -4  -1   2  108.38    3.44
  -4  -1   2  107.60    3.38
  -4  -1   2  111.85    3.47
  -4  -1   2  109.37    3.41
  -4  -1   2  109.84    3.07
  -4  -1   2  113.42    3.50
  -4  -1   2  107.25    3.19
  -4  -1   2  110.47    3.26
  -4  -1   2  104.24    2.99
   3   1  -2  227.13    5.48
   3   1  -2  217.88    4.92
   3   1  -2  216.88    5.27
   3   1  -2  216.70    5.48
   3   1  -2  215.96    5.50
   3   1  -2  208.96    5.47
   3   1  -2  220.42    5.48
   3   1  -2  222.03    4.99
   3   1  -2  224.25    4.83
   3   1  -2  222.96    5.34
  -3  -1   2  215.81    5.27
  -3  -1   2  216.51    4.88
  -3  -1   2  220.21    5.47
  -3  -1   2  222.55    5.58
  -3  -1   2  221.90    5.79
  -3  -1   2  218.98    5.16
  -3  -1   2  216.09    5.51
  -3  -1   2  223.05    5.49
  -3  -1   2  220.16    4.94
  -3  -1   2  221.79    5.52
   2   1  -2   17.90    0.95
   2   1  -2   19.77    0.95
   2   1  -2   19.76    0.96
   2   1  -2   19.58    0.86
   2   1  -2   18.54    0.90
   2   1  -2   18.46    0.92
   2   1  -2   18.92    0.83
   2   1  -2   18.62    0.91
   2   1  -2   19.20    0.94
   2   1  -2   19.86    0.87
  -2  -1   2   19.35    0.94
  -2  -1   2   21.34    0.96
  -2  -1   2   19.32    0.86
  -2  -1   2   18.68    0.94
  -2  -1   2   18.09    0.91
  -2  -1   2   18.21    0.92
  -2  -1   2   19.08    0.92
  -2  -1   2   21.61    0.95
   1   1  -2    0.38    0.19
   1   1  -2    0.57    0.22
   1   1  -2    0.34    0.18
   1   1  -2    0.26    0.16
   1   1  -2    0.30    0.15
   1   1  -2    0.42    0.18
   1   1  -2    0.25    0.15
   1   1  -2    0.49    0.20
   1   1  -2    0.75    0.27
   1   1  -2    0.43    0.18
   1   1  -2    0.42    0.19
   1   1  -2    0.63    0.21
   1   1  -2    0.28    0.17
  -1  -1   2    1.09    0.24
  -1  -1   2    0.66    0.17
  -1  -1   2    0.70    0.20
  -1  -1   2    0.45    0.15
  -1  -1   2    0.33    0.17
  -1  -1   2    0.33    0.19
  -1  -1   2    0.55    0.19
  -1  -1   2    0.59    0.17
  -1  -1   2    0.91    0.25
  -1  -1   2    0.62    0.20
  -1  -1   2    0.14    0.14
  -1  -1   2    0.79    0.27
   0   1  -2   27.85    0.89
   0   1  -2   26.99    0.79
   0   1  -2   27.99    0.83
   0   1  -2   27.13    0.72
   0   1  -2   27.12    0.96
   0   1  -2   27.62    0.75
   0   1  -2   27.99    0.84
   0   1  -2   26.32    0.90
   0   1  -2   27.84    0.85
   0   1  -2   24.89    0.82
   0   1  -2   27.55    0.82
   0   1  -2   27.28    0.66
   0  -1   2   27.96    0.70
   0  -1   2   25.37    0.78
   0  -1   2   24.33    0.77
   0  -1   2   26.55    0.78
   0  -1   2   25.77    0.87
   0  -1   2   27.13    0.88
   0  -1   2   27.76    0.84
   0  -1   2   26.72    0.89
   0  -1   2   28.37    0.80
   0  -1   2   26.73    0.85
   0  -1   2   27.04    0.85
   0  -1   2   27.52    0.62
  -1   1  -2   17.74    0.44
  -1   1  -2   17.49    0.66
  -1   1  -2   18.03    0.50
  -1   1  -2   18.11    0.47
  -1   1  -2   19.10    0.59
  -1   1  -2   17.24    0.62
  -1   1  -2   17.43    0.51
  -1   1  -2   17.76    0.51
  -1   1  -2   18.89    0.61
  -1   1  -2   18.63    0.62
  -1   1  -2   18.87    0.61
  -1   1  -2   18.08    0.54
  -1   1  -2   19.57    0.69
  -1   1  -2   17.62    0.49
   1  -1   2   18.10    0.52
   1  -1   2   18.65    0.68
   1  -1   2   17.73    0.62
   1  -1   2   17.81    0.60
   1  -1   2   18.10    0.68
   1  -1   2   18.24    0.49
   1  -1   2   18.31    0.60
   1  -1   2   16.87    0.57
   1  -1   2   18.63    0.61
   1  -1   2   18.66    0.60
   1  -1   2   17.50    0.54
  -2   1  -2  201.60    4.60
  -2   1  -2  209.75    4.88
  -2   1  -2  200.06    4.63
  -2   1  -2  214.30    4.66
  -2   1  -2  208.33    4.12
  -2   1  -2  207.12    4.37
  -2   1  -2  204.62    4.19
  -2   1  -2  201.98    4.12
  -2   1  -2  198.09    4.43
  -2   1  -2  201.00    4.56
  -2   1  -2  197.50    4.63
  -2   1  -2  209.57    4.36
  -2   1  -2  206.71    4.46
  -2   1  -2  202.40    4.36
  -2   1  -2  201.84    4.19
  -2   1  -2  201.38    4.19
   2  -1   2  204.56    4.85
   2  -1   2  207.43    4.55
   2  -1   2  211.69    4.68
   2  -1   2  209.19    4.63
   2  -1   2  205.45    4.67
   2  -1   2  199.03    4.67
   2  -1   2  212.14    4.47
   2  -1   2  208.96    4.67
   2  -1   2  205.21    4.46
   2  -1   2  204.10    4.00
   2  -1   2  202.40    4.58
   2  -1   2  202.34    4.02
   2  -1   2  206.48    4.17
   2  -1   2  210.07    4.16
  -3   1  -2  199.98    4.76
  -3   1  -2  198.93    4.25
  -3   1  -2  206.73    4.55
  -3   1  -2  202.38    4.29
  -3   1  -2  196.85    4.52
  -3   1  -2  210.84    4.84
  -3   1  -2  202.00    4.46
  -3   1  -2  199.46    4.57
  -3   1  -2  197.64    4.34
  -3   1  -2  198.45    4.80
  -3   1  -2  201.08    4.33
  -3   1  -2  197.56    5.04
   3  -1   2  198.10    4.31
   3  -1   2  192.77    4.81
   3  -1   2  207.16    4.86
   3  -1   2  205.24    4.81
   3  -1   2  201.13    4.69
   3  -1   2  197.51    4.08
   3  -1   2  196.12    4.85
   3  -1   2  192.82    4.81
   3  -1   2  196.28    5.02
   3  -1   2  201.48    4.18
   3  -1   2  196.28    4.52
  -4   1  -2  229.13    5.15
  -4   1  -2  229.21    6.03
  -4   1  -2  232.71    5.70
  -4   1  -2  234.56    5.43
  -4   1  -2  230.72    5.06
  -4   1  -2  235.32    5.23
  -4   1  -2  233.32    5.21
  -4   1  -2  234.81    5.14
  -4   1  -2  235.16    5.51
  -4   1  -2  233.16    5.76
  -4   1  -2  236.00    5.77
   4  -1   2  235.71    5.36
   4  -1   2  226.71    5.56
   4  -1   2  224.18    5.97
   4  -1   2  230.68    5.78
   4  -1   2  231.55    5.79
   4  -1   2  230.61    4.84
   4  -1   2  231.20    5.78
   4  -1   2  232.56    4.71
   4  -1   2  237.84    5.76
   4  -1   2  229.51    5.16
   4  -1   2  228.24    4.97
  -5   1  -2   94.75    2.93
  -5   1  -2  100.79    2.98
  -5   1  -2   93.85    2.61
  -5   1  -2   98.42    3.16
  -5   1  -2   94.70    2.70
  -5   1  -2   92.95    3.27
  -5   1  -2   95.13    2.72
  -5   1  -2   91.68    3.10
  -5   1  -2   91.96    2.80
  -5   1  -2   95.61    2.76
   5  -1   2   97.90    2.31
   5  -1   2   92.58    2.82
   5  -1   2   94.68    3.14
   5  -1   2   95.94    3.10
   5  -1   2   97.26    2.79
   5  -1   2   86.86    2.92
   5  -1   2   95.16    2.59
   5  -1   2   91.24    3.12
   5  -1   2   94.00    2.42
   5  -1   2   91.98    3.12
   5  -1   2   96.24    3.26
   5  -1   2   95.96    3.16
  -6   1  -2  126.58    3.53
  -6   1  -2  125.31    3.34
  -6   1  -2  117.72    3.62
  -6   1  -2  123.24    4.05
   6  -1   2  123.41    3.84
   6  -1   2  126.27    3.64
   6  -1   2  128.39    4.23
   6  -1   2  115.67    4.00
   6  -1   2  122.59    4.02
   6  -1   2  126.09    3.33
   6  -1   2  121.86    4.06
   6  -1   2  125.62    2.99
   6  -1   2  126.78    3.62
  -7   1  -2   93.13    3.16
  -7   1  -2   94.06    3.64
  -7   1  -2   92.44    3.31
   7  -1   2   98.09    2.92
   7  -1   2   98.16    3.26
   7  -1   2   93.20    3.69
   7  -1   2   98.91    3.49
   7  -1   2   96.52    3.27
   7  -1   2   98.11    3.85
   7  -1   2   99.69    3.74
  -8   1  -2    3.94    0.79
  -8   1  -2    4.52    1.01
  -8   1  -2    3.61    0.85
   8  -1   2    2.82    0.83
   8  -1   2    2.92    0.86
   8  -1   2    3.06    0.78
   8  -1   2    2.80    0.84
   8  -1   2    4.16    0.92
   8  -1   2    4.41    0.88
  -9   1  -2    1.19    0.74
   9  -1   2    0.52    0.73
   9  -1   2    0.92    0.78
   9  -1   2    3.11    0.94
   9  -1   2    3.14    0.99
  10   0  -2   67.07    3.52
   9   0  -2   50.41    2.80
  -9   0   2   51.37    2.81
   8   0  -2   54.65    3.00
   8   0  -2   50.68    2.08
   8   0  -2   52.39    2.62
   8   0  -2   48.47    2.41
   8   0  -2   51.01    2.23
  -8   0   2   47.35    2.50
   7   0  -2   29.77    1.98
   7   0  -2   29.77    1.98
   7   0  -2   30.71    1.51
   7   0  -2   26.32    1.65
   7   0  -2   30.03    2.09
   7   0  -2   29.50    1.80
   7   0  -2   30.77    1.67
  -7   0   2   34.04    1.93
  -7   0   2   30.52    1.99
   6   0  -2    0.55    0.33
   6   0  -2    0.20    0.40
   6   0  -2    0.73    0.51
   6   0  -2    1.12    0.52
   6   0  -2    0.72    0.47
   6   0  -2    1.27    0.48
   6   0  -2    1.26    0.46
   6   0  -2    1.39    0.59
   6   0  -2   -0.18    0.35
  -6   0   2    0.68    0.47
  -6   0   2    0.66    0.42
  -6   0   2    0.69    0.59
  -6   0   2    0.34    0.48
  -6   0   2    0.60    0.42
  -6   0   2    0.58    0.46
   5   0  -2   69.80    2.43
   5   0  -2   68.91    2.81
   5   0  -2   72.81    2.73
   5   0  -2   75.76    2.77
   5   0  -2   70.01    2.36
   5   0  -2   67.99    2.08
   5   0  -2   68.27    2.43
   5   0  -2   66.80    2.56
   5   0  -2   66.31    2.59
  -5   0   2   68.24    2.48
  -5   0   2   71.59    2.74
  -5   0   2   70.72    2.82
  -5   0   2   66.61    2.46
  -5   0   2   69.16    2.63
  -5   0   2   70.80    2.69
  -5   0   2   69.47    2.67
  -5   0   2   67.94    2.38
   4   0  -2   47.52    1.76
   4   0  -2   45.30    1.99
   4   0  -2   49.08    1.90
   4   0  -2   47.51    1.93
   4   0  -2   46.17    1.92
   4   0  -2   47.67    1.89
   4   0  -2   46.53    1.77
   4   0  -2   49.00    1.73
   4   0  -2   45.83    1.46
   4   0  -2   45.15    1.89
   4   0  -2   48.55    1.88
   4   0  -2   49.32    1.64
  -4   0   2   50.10    1.98
  -4   0   2   46.99    1.79
  -4   0   2   46.38    1.70
  -4   0   2   46.08    2.01
  -4   0   2   45.95    1.88
  -4   0   2   46.96    1.95
  -4   0   2   45.51    1.77
  -4   0   2   47.50    1.93
   3   0  -2  237.49    5.64
   3   0  -2  229.54    5.01
   3   0  -2  231.62    5.57
   3   0  -2  237.15    4.96
   3   0  -2  226.66    5.88
   3   0  -2  226.28    5.59
   3   0  -2  226.43    5.40
   3   0  -2  228.76    5.32
   3   0  -2  227.80    5.07
   3   0  -2  232.02    5.60
   3   0  -2  224.72    5.60
  -3   0   2  227.28    5.62
  -3   0   2  221.81    5.54
  -3   0   2  231.07    5.05
  -3   0   2  234.02    5.24
  -3   0   2  226.23    5.65
  -3   0   2  230.30    5.26
  -3   0   2  236.23    5.61
  -3   0   2  229.25    5.40
   2   0  -2  172.39    3.90
   2   0  -2  174.22    4.16
   2   0  -2  179.77    4.16
   2   0  -2  170.43    4.32
   2   0  -2  175.47    3.73
   2   0  -2  177.91    3.72
   2   0  -2  170.09    3.93
   2   0  -2  177.21    3.68
   2   0  -2  170.62    3.74
   2   0  -2  172.37    4.01
   2   0  -2  175.21    4.18
   2   0  -2  173.31    4.14
   2   0  -2  168.79    4.13
   2   0  -2  170.42    3.75
   2   0  -2  163.02    4.09
  -2   0   2  170.72    4.18
  -2   0   2  171.78    3.90
  -2   0   2  170.51    4.12
  -2   0   2  169.13    3.71
  -2   0   2  172.04    4.12
  -2   0   2  170.10    4.33
  -2   0   2  172.75    3.88
  -2   0   2  173.27    4.15
  -2   0   2  167.71    4.14
  -2   0   2  170.99    3.72
   1   0  -2  523.40   10.91
   1   0  -2  515.03   10.30
   1   0  -2  522.69   11.04
   1   0  -2  516.72   10.30
   1   0  -2  530.87   10.92
   1   0  -2  524.48   10.35
   1   0  -2  527.41   10.73
   1   0  -2  518.73    9.90
   1   0  -2  523.73   11.05
   1   0  -2  514.76   10.92
   1   0  -2  528.03    9.90
   1   0  -2  518.77   11.42
  -1   0   2  518.76   11.42
  -1   0   2  512.67   11.21
  -1   0   2  528.18   10.35
  -1   0   2  520.67    9.89
  -1   0   2  528.19   10.91
  -1   0   2  512.05   10.90
  -1   0   2  519.17    9.88
  -1   0   2  511.06   10.29
  -1   0   2  514.32   10.50
  -1   0   2  524.97   11.08
  -1   0   2  514.23   10.29
  -1   0   2  531.13   10.93
   0   0  -2  354.36    7.11
   0   0  -2  348.88    6.91
   0   0   2  347.13    7.17
   0   0   2  353.58    6.91
   0   0   2  352.93    7.19
   0   0   2  359.52    7.11
   0   0   2  345.74    7.18
  -1   0  -2    3.55    0.24
  -1   0  -2    4.33    0.23
  -1   0  -2    3.70    0.23
  -1   0  -2    3.59    0.21
  -1   0  -2    3.97    0.27
  -1   0  -2    3.53    0.19
  -1   0  -2    4.12    0.33
  -1   0  -2    3.28    0.21
  -1   0  -2    2.53    0.28
  -1   0  -2    3.73    0.26
  -1   0  -2    4.22    0.34
   1   0   2    2.89    0.30
   1   0   2    3.20    0.19
   1   0   2    3.86    0.25
   1   0   2    3.93    0.17
   1   0   2    3.49    0.25
   1   0   2    3.91    0.20
   1   0   2    3.58    0.25
   1   0   2    3.84    0.15
  -2   0  -2   93.96    2.41
  -2   0  -2   97.18    2.43
  -2   0  -2   94.89    2.41
  -2   0  -2   93.56    2.08
  -2   0  -2   95.16    2.45
  -2   0  -2   98.19    2.58
  -2   0  -2   94.90    2.17
  -2   0  -2   93.44    2.15
  -2   0  -2   96.75    2.21
  -2   0  -2   95.91    2.47
   2   0   2   97.37    2.44
   2   0   2   94.79    1.91
   2   0   2   96.34    2.45
   2   0   2   95.46    2.42
   2   0   2   93.59    2.02
   2   0   2   95.46    2.47
   2   0   2   95.07    2.44
   2   0   2   94.80    2.35
   2   0   2   95.08    2.10
   2   0   2   93.71    2.18
   2   0   2   95.80    2.55
   2   0   2   94.15    2.55
   2   0   2   99.28    2.42
  -3   0  -2   14.05    0.68
  -3   0  -2   14.42    0.83
  -3   0  -2   15.20    0.74
  -3   0  -2   15.71    0.87
  -3   0  -2   14.98    0.85
  -3   0  -2   14.21    0.81
  -3   0  -2   13.68    0.70
  -3   0  -2   14.83    0.73
  -3   0  -2   15.93    0.84
  -3   0  -2   14.13    0.86
   3   0   2   14.67    0.84
   3   0   2   13.69    0.81
   3   0   2   13.67    0.85
   3   0   2   15.37    0.91
   3   0   2   15.21    0.85
   3   0   2   14.03    0.81
   3   0   2   15.82    0.66
   3   0   2   14.95    0.85
   3   0   2   15.35    0.85
   3   0   2   14.26    0.57
   3   0   2   14.89    0.75
   3   0   2   16.27    0.61
  -4   0  -2    0.18    0.22
  -4   0  -2    0.21    0.24
  -4   0  -2    0.25    0.24
  -4   0  -2    0.04    0.20
  -4   0  -2    0.24    0.23
  -4   0  -2   -0.04    0.22
  -4   0  -2    0.28    0.28
  -4   0  -2    0.01    0.21
  -4   0  -2    0.21    0.27
  -4   0  -2    0.12    0.26
   4   0   2    0.43    0.21
   4   0   2    0.10    0.16
   4   0   2    0.15    0.26
   4   0   2    0.15    0.27
   4   0   2    0.17    0.28
   4   0   2    0.14    0.24
   4   0   2    0.35    0.32
   4   0   2    0.23    0.18
   4   0   2    0.23    0.28
   4   0   2    0.17    0.26
   4   0   2   -0.14    0.12
   4   0   2    0.08    0.24
  -5   0  -2   13.30    0.93
  -5   0  -2   13.59    0.99
  -5   0  -2   12.33    1.02
  -5   0  -2   12.28    0.89
  -5   0  -2   11.23    0.92
  -5   0  -2   13.92    0.88
  -5   0  -2   13.40    0.96
   5   0   2   12.55    1.06
   5   0   2   16.65    1.19
   5   0   2   12.74    1.10
   5   0   2   13.80    1.09
   5   0   2   13.97    1.09
   5   0   2   12.48    0.73
   5   0   2   12.84    0.98
   5   0   2   14.09    0.84
   5   0   2   12.19    1.07
   5   0   2   13.95    0.74
   5   0   2   13.87    0.97
  -6   0  -2    7.74    0.82
  -6   0  -2    8.27    1.14
  -6   0  -2    7.42    0.94
  -6   0  -2    6.17    0.79
   6   0   2    6.83    0.98
   6   0   2    8.46    1.08
   6   0   2    7.23    0.97
   6   0   2    8.24    1.12
   6   0   2    9.32    0.87
   6   0   2    6.93    1.07
   6   0   2    6.10    0.87
   6   0   2    7.50    0.97
  -7   0  -2   21.68    1.42
  -7   0  -2   20.24    1.49
  -7   0  -2   20.91    1.64
   7   0   2   20.92    1.47
   7   0   2   21.19    1.49
   7   0   2   20.11    1.64
   7   0   2   22.65    1.78
   7   0   2   20.42    1.65
   7   0   2   19.25    1.63
  -8   0  -2   32.54    2.05
  -8   0  -2   28.93    2.14
   8   0   2   31.46    2.18
   8   0   2   31.01    1.94
   8   0   2   29.46    2.21
   8   0   2   32.08    2.25
   8   0   2   33.13    2.01
   8   0   2   28.79    2.21
  -9   0  -2   37.60    2.39
   9   0   2   34.31    2.43
   9   0   2   34.53    2.21
   9   0   2   37.10    2.68
   9   0   2   34.93    2.59
  10  -1  -2    2.89    1.07
 -10   1   2    2.91    1.03
   9  -1  -2    5.87    1.14
   9  -1  -2    9.52    1.12
   9  -1  -2    9.42    1.02
  -9   1   2    4.80    1.07
   8  -1  -2   31.59    1.63
   8  -1  -2   32.29    2.01
   8  -1  -2   32.43    1.91
   8  -1  -2   33.10    1.79
   8  -1  -2   30.69    2.18
   8  -1  -2   34.50    2.20
  -8   1   2   31.86    2.02
   7  -1  -2   50.91    1.86
   7  -1  -2   54.55    2.32
   7  -1  -2   47.98    2.43
   7  -1  -2   52.18    2.66
   7  -1  -2   51.24    2.25
   7  -1  -2   56.92    2.86
   7  -1  -2   53.37    2.60
   7  -1  -2   50.50    2.34
  -7   1   2   54.01    2.39
   6  -1  -2  118.44    3.51
   6  -1  -2  114.58    3.03
   6  -1  -2  118.00    4.20
   6  -1  -2  124.21    4.07
   6  -1  -2  121.74    3.65
   6  -1  -2  120.64    3.81
   6  -1  -2  123.27    4.07
   6  -1  -2  112.76    3.91
   6  -1  -2  115.17    3.63
  -6   1   2  118.73    3.60
  -6   1   2  111.05    4.14
  -6   1   2  116.72    3.46
  -6   1   2  113.98    3.93
  -6   1   2  114.94    3.94
  -6   1   2  119.65    4.06
  -6   1   2  116.33    3.75
   5  -1  -2  296.14    6.84
   5  -1  -2  300.44    7.57
   5  -1  -2  298.84    7.56
   5  -1  -2  303.05    7.96
   5  -1  -2  295.23    7.55
   5  -1  -2  290.78    7.54
   5  -1  -2  294.40    6.31
   5  -1  -2  299.04    7.24
   5  -1  -2  300.11    6.73
   5  -1  -2  302.78    7.11
  -5   1   2  298.35    7.28
  -5   1   2  295.67    7.93
  -5   1   2  291.60    7.58
  -5   1   2  298.02    7.52
  -5   1   2  304.22    7.61
  -5   1   2  297.53    7.55
  -5   1   2  295.55    7.08
  -5   1   2  299.61    6.83
  -5   1   2  295.84    6.64
   4  -1  -2  160.52    4.60
   4  -1  -2  150.32    3.42
   4  -1  -2  158.21    3.77
   4  -1  -2  152.73    3.85
   4  -1  -2  158.71    4.31
   4  -1  -2  154.80    4.33
   4  -1  -2  157.09    4.28
   4  -1  -2  160.05    3.94
   4  -1  -2  152.64    4.33
   4  -1  -2  162.01    3.97
   4  -1  -2  158.78    4.35
   4  -1  -2  151.99    4.04
   4  -1  -2  157.95    4.16
   4  -1  -2  158.04    4.05
  -4   1   2  156.92    4.06
  -4   1   2  158.64    4.38
  -4   1   2  157.69    4.31
  -4   1   2  154.97    4.13
  -4   1   2  161.20    3.91
  -4   1   2  158.62    3.81
  -4   1   2  159.51    4.38
  -4   1   2  169.01    4.41
   3  -1  -2   49.17    1.49
   3  -1  -2   49.23    1.74
   3  -1  -2   49.38    1.71
   3  -1  -2   45.50    1.55
   3  -1  -2   50.19    1.64
   3  -1  -2   48.55    1.63
   3  -1  -2   48.18    1.83
   3  -1  -2   46.15    1.67
   3  -1  -2   47.69    1.14
   3  -1  -2   49.06    1.76
  -3   1   2   48.03    1.48
  -3   1   2   48.16    1.61
  -3   1   2   47.23    1.52
  -3   1   2   47.76    1.74
  -3   1   2   46.48    1.72
  -3   1   2   44.33    1.68
  -3   1   2   48.00    1.54
  -3   1   2   48.98    1.71
   2  -1  -2    2.07    0.31
   2  -1  -2    1.96    0.34
   2  -1  -2    2.12    0.29
   2  -1  -2    1.15    0.23
   2  -1  -2    1.72    0.31
   2  -1  -2    2.28    0.35
   2  -1  -2    2.00    0.34
   2  -1  -2    2.48    0.37
   2  -1  -2    2.15    0.32
   2  -1  -2    2.25    0.35
   2  -1  -2    2.09    0.15
   2  -1  -2    2.43    0.36
  -2   1   2    1.84    0.34
  -2   1   2    1.74    0.31
  -2   1   2    1.53    0.29
  -2   1   2    2.09    0.29
  -2   1   2    2.31    0.28
  -2   1   2    1.60    0.31
  -2   1   2    1.76    0.25
  -2   1   2    1.30    0.28
  -2   1   2    1.91    0.30
  -2   1   2    1.60    0.27
   1  -1  -2   65.90    1.76
   1  -1  -2   67.14    1.58
   1  -1  -2   68.71    1.73
   1  -1  -2   68.25    1.79
   1  -1  -2   66.33    1.63
   1  -1  -2   66.28    1.75
   1  -1  -2   67.33    1.53
   1  -1  -2   67.96    1.72
   1  -1  -2   67.67    1.83
   1  -1  -2   64.52    1.86
  -1   1   2   69.80    1.51
  -1   1   2   69.26    1.79
  -1   1   2   69.27    1.85
  -1   1   2   67.31    1.57
  -1   1   2   66.07    1.46
  -1   1   2   67.36    1.74
  -1   1   2   70.53    1.73
  -1   1   2   66.30    1.78
  -1   1   2   69.13    1.90
  -1   1   2   68.66    1.64
   0  -1  -2    0.13    0.12
   0  -1  -2    0.12    0.09
   0  -1  -2    0.16    0.12
   0  -1  -2    0.32    0.08
   0  -1  -2   -0.02    0.13
   0  -1  -2    0.15    0.08
   0  -1  -2    0.57    0.16
   0  -1  -2    0.21    0.16
   0  -1  -2    0.19    0.10
   0  -1  -2    0.06    0.14
   0  -1  -2    0.17    0.16
   0  -1  -2    0.12    0.14
   0   1   2    0.12    0.14
   0   1   2    0.03    0.13
   0   1   2    0.37    0.18
   0   1   2    0.10    0.09
   0   1   2    0.38    0.15
   0   1   2   -0.02    0.09
   0   1   2    0.37    0.12
   0   1   2    0.21    0.13
   0   1   2    0.62    0.16
   0   1   2    0.09    0.10
   0   1   2    0.63    0.20
   0   1   2    0.48    0.19
  -1  -1  -2   36.11    1.09
  -1  -1  -2   34.95    0.97
  -1  -1  -2   35.09    1.07
  -1  -1  -2   36.43    1.10
  -1  -1  -2   35.83    0.88
  -1  -1  -2   36.50    1.22
  -1  -1  -2   37.13    1.27
  -1  -1  -2   34.66    0.92
  -1  -1  -2   35.72    1.06
  -1  -1  -2   34.99    0.98
  -1  -1  -2   36.24    1.19
   1   1   2   34.57    1.26
   1   1   2   36.87    0.92
   1   1   2   37.53    1.14
   1   1   2   36.27    1.20
   1   1   2   35.31    1.19
   1   1   2   36.15    1.05
   1   1   2   35.15    0.98
   1   1   2   35.83    1.03
   1   1   2   35.91    1.14
   1   1   2   37.12    1.21
   1   1   2   36.82    1.07
  -2  -1  -2  230.70    5.01
  -2  -1  -2  233.19    4.68
  -2  -1  -2  228.66    5.31
  -2  -1  -2  233.48    5.41
  -2  -1  -2  227.82    4.88
  -2  -1  -2  229.26    4.82
  -2  -1  -2  224.78    5.43
  -2  -1  -2  224.69    4.79
  -2  -1  -2  227.37    4.89
  -2  -1  -2  236.34    5.68
   2   1   2  226.18    5.49
   2   1   2  230.17    4.46
   2   1   2  223.72    5.65
   2   1   2  238.21    5.23
   2   1   2  231.55    5.35
   2   1   2  218.15    4.79
   2   1   2  231.28    4.69
   2   1   2  241.41    5.36
   2   1   2  227.43    5.38
   2   1   2  231.05    4.86
   2   1   2  230.79    5.41
   2   1   2  229.78    4.54
  -3  -1  -2  128.33    3.04
  -3  -1  -2  129.41    3.19
  -3  -1  -2  126.29    3.29
  -3  -1  -2  132.47    3.62
  -3  -1  -2  130.10    3.57
  -3  -1  -2  136.74    3.79
  -3  -1  -2  126.34    3.48
  -3  -1  -2  132.69    3.52
  -3  -1  -2  129.20    3.16
   3   1   2  124.93    3.42
   3   1   2  129.30    2.79
   3   1   2  122.81    3.03
   3   1   2  128.21    3.21
   3   1   2  129.16    3.58
   3   1   2  128.45    3.49
   3   1   2  126.99    3.54
   3   1   2  135.31    3.60
   3   1   2  125.58    3.59
   3   1   2  130.78    2.94
   3   1   2  128.75    3.74
  -4  -1  -2  144.92    4.34
  -4  -1  -2  149.27    4.21
  -4  -1  -2  142.23    3.87
  -4  -1  -2  144.04    3.68
  -4  -1  -2  143.03    4.06
  -4  -1  -2  146.76    4.13
  -4  -1  -2  140.40    3.65
  -4  -1  -2  139.52    3.52
   4   1   2  139.78    3.18
   4   1   2  146.27    4.33
   4   1   2  144.71    3.70
   4   1   2  137.71    4.06
   4   1   2  141.17    3.37
   4   1   2  142.16    4.09
   4   1   2  136.93    3.87
   4   1   2  145.84    4.13
   4   1   2  140.74    4.03
   4   1   2  141.69    3.46
  -5  -1  -2  160.34    4.18
  -5  -1  -2  150.84    4.64
  -5  -1  -2  152.43    4.57
   5   1   2  154.59    4.73
   5   1   2  151.75    3.53
   5   1   2  152.60    4.57
   5   1   2  153.96    3.75
   5   1   2  150.41    4.58
   5   1   2  156.65    4.65
   5   1   2  157.17    4.72
   5   1   2  150.01    4.12
   5   1   2  149.00    3.79
   5   1   2  159.53    4.88
   5   1   2  151.47    4.31
  -6  -1  -2   55.27    2.30
  -6  -1  -2   53.44    2.53
   6   1   2   58.57    2.35
   6   1   2   58.02    2.76
   6   1   2   56.58    2.57
   6   1   2   53.95    2.37
   6   1   2   55.17    2.61
   6   1   2   52.31    2.55
   6   1   2   56.58    2.69
   6   1   2   59.65    1.99
  -7  -1  -2   61.89    2.70
  -7  -1  -2   67.22    3.10
   7   1   2   67.77    2.75
   7   1   2   65.91    3.13
   7   1   2   65.82    3.10
   7   1   2   65.53    3.21
   7   1   2   63.51    2.77
   7   1   2   66.56    3.08
  -8  -1  -2   24.30    1.88
  -8  -1  -2   23.56    2.00
   8   1   2   24.18    1.80
   8   1   2   23.86    2.05
   8   1   2   27.37    2.18
   8   1   2   24.45    1.84
   8   1   2   26.65    2.11
  -9  -1  -2    6.39    1.27
   9   1   2    7.41    1.44
   9   1   2    8.18    1.54
   9   1   2    6.45    1.24
   9   1   2    6.87    1.67
  10  -2  -2   51.51    2.93
 -10   2   2   50.31    2.92
   9  -2  -2   78.92    3.53
   9  -2  -2   74.51    2.92
   9  -2  -2   79.44    3.49
   9  -2  -2   74.40    3.35
  -9   2   2   70.35    3.26
   8  -2  -2   71.96    2.67
   8  -2  -2   70.53    2.86
   8  -2  -2   77.03    2.98
   8  -2  -2   76.02    3.20
   8  -2  -2   71.71    3.04
   8  -2  -2   68.58    3.27
  -8   2   2   74.23    3.10
  -8   2   2   74.34    2.92
   7  -2  -2   27.26    1.61
   7  -2  -2   26.75    1.47
   7  -2  -2   27.87    1.99
   7  -2  -2   25.09    1.59
   7  -2  -2   26.02    1.81
   7  -2  -2   27.35    1.20
   7  -2  -2   27.61    1.90
   7  -2  -2   28.15    1.71
   7  -2  -2   26.62    1.73
  -7   2   2   29.07    1.89
  -7   2   2   26.49    1.57
  -7   2   2   26.44    1.67
   6  -2  -2   25.27    1.47
   6  -2  -2   23.59    1.60
   6  -2  -2   25.16    1.64
   6  -2  -2   24.15    1.60
   6  -2  -2   25.84    1.49
   6  -2  -2   24.92    1.02
   6  -2  -2   22.49    1.35
   6  -2  -2   24.71    1.47
   6  -2  -2   23.69    1.55
   6  -2  -2   24.33    1.70
   6  -2  -2   23.64    1.45
  -6   2   2   25.22    1.60
  -6   2   2   24.47    1.47
  -6   2   2   23.53    1.67
  -6   2   2   24.35    1.58
  -6   2   2   26.29    1.68
  -6   2   2   24.21    1.37
  -6   2   2   24.95    1.45
   5  -2  -2    5.85    0.80
   5  -2  -2    6.54    0.79
   5  -2  -2    6.29    0.84
   5  -2  -2    6.21    0.79
   5  -2  -2    7.09    0.80
   5  -2  -2    7.43    0.98
   5  -2  -2    6.40    0.82
   5  -2  -2    6.86    0.89
   5  -2  -2    8.47    1.12
   5  -2  -2    6.46    0.85
   5  -2  -2    6.87    0.47
  -5   2   2    6.96    0.93
  -5   2   2    6.99    0.85
  -5   2   2    5.54    0.80
  -5   2   2    6.49    0.88
  -5   2   2    6.26    0.84
  -5   2   2    4.98    0.63
  -5   2   2    6.14    0.78
  -5   2   2    9.80    1.22
  -5   2   2    6.54    0.82
   4  -2  -2   38.72    1.40
   4  -2  -2   34.55    1.56
   4  -2  -2   36.48    1.44
   4  -2  -2   38.79    1.69
   4  -2  -2   34.67    1.57
   4  -2  -2   36.31    1.53
   4  -2  -2   35.96    1.48
   4  -2  -2   34.31    1.49
   4  -2  -2   35.49    1.70
   4  -2  -2   35.19    1.63
  -4   2   2   35.91    1.63
  -4   2   2   35.24    1.70
  -4   2   2   34.39    1.49
  -4   2   2   36.91    1.62
  -4   2   2   35.65    1.40
  -4   2   2   32.96    1.40
  -4   2   2   35.98    1.65
  -4   2   2   35.80    1.51
  -4   2   2   34.50    1.36
  -4   2   2   37.80    1.65
   3  -2  -2  319.90    7.59
   3  -2  -2  330.30    7.48
   3  -2  -2  327.62    7.04
   3  -2  -2  325.89    7.57
   3  -2  -2  325.35    7.20
   3  -2  -2  335.96    7.66
   3  -2  -2  326.04    7.61
   3  -2  -2  328.48    6.74
   3  -2  -2  325.09    6.90
  -3   2   2  320.73    7.71
  -3   2   2  325.24    7.57
  -3   2   2  338.46    7.72
  -3   2   2  318.99    7.07
  -3   2   2  338.45    7.64
  -3   2   2  320.01    6.72
  -3   2   2  330.77    7.19
  -3   2   2  323.17    6.84
  -3   2   2  332.79    7.65
  -3   2   2  323.77    8.00
  -3   2   2  326.98    6.36
   2  -2  -2  478.33    9.46
   2  -2  -2  483.85   10.40
   2  -2  -2  463.03    9.25
   2  -2  -2  476.61   10.10
   2  -2  -2  465.58   10.34
   2  -2  -2  471.26   10.42
   2  -2  -2  483.36   10.92
   2  -2  -2  473.27    9.50
   2  -2  -2  482.38   10.37
   2  -2  -2  471.13    9.85
  -2   2   2  463.65   10.89
  -2   2   2  475.08   10.33
  -2   2   2  467.21   10.57
  -2   2   2  475.94    9.85
  -2   2   2  468.37    9.22
  -2   2   2  492.20   10.47
  -2   2   2  469.00    9.35
  -2   2   2  472.17   10.40
   1  -2  -2   56.49    1.63
   1  -2  -2   59.01    1.79
   1  -2  -2   57.60    1.82
   1  -2  -2   56.39    1.68
   1  -2  -2   56.47    1.88
   1  -2  -2   57.03    1.62
   1  -2  -2   54.72    1.74
   1  -2  -2   56.43    1.44
   1  -2  -2   55.87    1.54
   1  -2  -2   58.31    1.70
  -1   2   2   56.05    1.48
  -1   2   2   59.23    1.86
  -1   2   2   54.93    1.63
  -1   2   2   59.78    1.71
  -1   2   2   55.36    1.60
  -1   2   2   57.23    1.94
  -1   2   2   58.03    1.58
  -1   2   2   55.79    1.70
  -1   2   2   58.23    1.76
  -1   2   2   57.98    1.91
  -1   2   2   56.83    1.40
   0  -2  -2  325.74    7.37
   0  -2  -2  322.41    6.86
   0  -2  -2  335.64    7.75
   0  -2  -2  324.27    6.64
   0  -2  -2  328.88    6.85
   0  -2  -2  337.74    7.27
   0  -2  -2  328.70    6.96
   0  -2  -2  328.29    7.39
   0  -2  -2  334.09    6.51
   0  -2  -2  321.98    7.59
   0  -2  -2  327.21    7.58
   0   2   2  337.92    6.84
   0   2   2  341.37    7.40
   0   2   2  347.99    7.32
   0   2   2  344.11    7.47
   0   2   2  330.97    7.60
   0   2   2  329.85    7.28
   0   2   2  340.11    6.39
   0   2   2  339.04    6.59
   0   2   2  324.02    7.02
   0   2   2  339.47    7.57
   0   2   2  323.43    7.48
   0   2   2  336.92    6.70
  -1  -2  -2  149.35    3.34
  -1  -2  -2  153.37    4.12
  -1  -2  -2  150.99    3.52
  -1  -2  -2  153.50    3.41
  -1  -2  -2  153.99    3.91
  -1  -2  -2  152.13    3.96
  -1  -2  -2  149.49    3.78
  -1  -2  -2  151.31    3.41
  -1  -2  -2  147.99    3.56
  -1  -2  -2  156.00    3.80
  -1  -2  -2  149.99    3.43
  -1  -2  -2  151.24    3.66
   1   2   2  153.22    3.92
   1   2   2  152.26    3.08
   1   2   2  155.86    3.53
   1   2   2  151.38    3.76
   1   2   2  151.84    4.02
   1   2   2  159.16    3.84
   1   2   2  153.20    3.11
   1   2   2  151.61    3.98
   1   2   2  149.52    3.28
   1   2   2  147.29    3.95
   1   2   2  149.68    3.89
   1   2   2  154.46    3.42
  -2  -2  -2   69.55    2.18
  -2  -2  -2   68.58    2.41
  -2  -2  -2   66.61    1.94
  -2  -2  -2   68.17    2.07
  -2  -2  -2   68.73    2.13
  -2  -2  -2   67.78    2.31
  -2  -2  -2   70.22    2.36
  -2  -2  -2   67.89    1.98
  -2  -2  -2   69.62    1.95
   2   2   2   72.76    2.04
   2   2   2   71.31    2.27
   2   2   2   71.83    2.28
   2   2   2   66.30    2.25
   2   2   2   68.50    1.63
   2   2   2   67.24    2.36
   2   2   2   69.49    1.72
   2   2   2   69.57    2.15
   2   2   2   68.97    2.01
  -3  -2  -2    5.21    0.62
  -3  -2  -2    7.43    0.88
  -3  -2  -2    6.08    0.78
  -3  -2  -2    6.11    0.80
  -3  -2  -2    4.90    0.62
  -3  -2  -2    7.86    0.85
  -3  -2  -2    5.66    0.65
  -3  -2  -2    5.85    0.76
  -3  -2  -2    5.81    0.63
   3   2   2    7.09    0.70
   3   2   2    5.87    0.66
   3   2   2    6.11    0.42
   3   2   2    4.85    0.74
   3   2   2    6.14    0.73
   3   2   2    5.86    0.73
   3   2   2    4.49    0.63
   3   2   2    5.44    0.68
   3   2   2    4.42    0.64
   3   2   2    6.60    0.50
  -4  -2  -2    3.50    0.59
  -4  -2  -2    2.83    0.54
  -4  -2  -2    2.38    0.50
  -4  -2  -2    3.96    0.75
  -4  -2  -2    2.96    0.55
   4   2   2    2.49    0.51
   4   2   2    2.92    0.61
   4   2   2    2.98    0.43
   4   2   2    2.43    0.58
   4   2   2    3.93    0.43
   4   2   2    3.44    0.67
   4   2   2    3.63    0.80
   4   2   2    2.48    0.57
   4   2   2    3.28    0.67
  -5  -2  -2    4.94    0.83
  -5  -2  -2    4.12    0.75
  -5  -2  -2    5.84    0.84
   5   2   2    4.61    0.86
   5   2   2    5.12    0.78
   5   2   2    4.59    0.88
   5   2   2    5.66    0.94
   5   2   2    4.50    0.57
   5   2   2    6.08    0.93
   5   2   2    5.91    0.89
   5   2   2    4.63    0.51
  -6  -2  -2   13.26    1.36
  -6  -2  -2   13.13    1.54
   6   2   2   13.07    1.63
   6   2   2   14.06    1.55
   6   2   2   11.52    1.31
   6   2   2    9.98    1.46
   6   2   2   11.26    1.37
   6   2   2   12.56    1.32
  -7  -2  -2   15.05    1.62
  -7  -2  -2   19.06    2.02
   7   2   2   13.53    1.62
   7   2   2   12.62    1.47
   7   2   2   19.00    1.52
   7   2   2   13.31    1.71
   7   2   2   19.71    2.25
   7   2   2   15.22    1.71
  -8  -2  -2   28.02    2.04
   8   2   2   28.97    2.39
   8   2   2   23.38    1.96
   8   2   2   29.74    2.30
   8   2   2   27.05    2.33
  -9  -2  -2   19.47    2.12
   9   2   2   19.36    2.11
   9   2   2   24.27    2.67
   9   2   2   17.59    2.33
  10  -3  -2   -0.81    0.69
 -10   3   2    0.02    0.74
   9  -3  -2    0.95    0.62
   9  -3  -2    0.94    0.59
   9  -3  -2    0.75    0.64
  -9   3   2    2.06    0.73
  -9   3   2    1.62    0.78
   8  -3  -2    7.68    1.18
   8  -3  -2    7.25    0.90
   8  -3  -2    7.01    1.08
   8  -3  -2    9.97    1.35
   8  -3  -2    6.51    1.08
  -8   3   2    6.85    1.12
  -8   3   2    8.82    1.18
   7  -3  -2   43.83    1.94
   7  -3  -2   44.87    1.83
   7  -3  -2   41.67    2.13
   7  -3  -2   41.63    2.44
   7  -3  -2   43.45    2.12
   7  -3  -2   44.45    2.34
   7  -3  -2   42.87    2.16
   7  -3  -2   46.25    2.11
   7  -3  -2   39.30    2.05
  -7   3   2   38.96    1.95
  -7   3   2   46.25    2.42
  -7   3   2   45.37    2.19
   6  -3  -2   44.51    2.01
   6  -3  -2   44.59    1.96
   6  -3  -2   42.02    2.29
   6  -3  -2   46.85    2.30
   6  -3  -2   45.62    1.77
   6  -3  -2   44.06    2.18
   6  -3  -2   43.34    2.04
   6  -3  -2   43.51    1.87
   6  -3  -2   47.76    2.10
   6  -3  -2   42.22    2.19
   6  -3  -2   46.41    1.98
  -6   3   2   46.37    2.23
  -6   3   2   44.89    2.26
  -6   3   2   45.80    2.00
  -6   3   2   44.30    2.06
  -6   3   2   45.61    2.23
  -6   3   2   44.57    2.34
  -6   3   2   47.70    2.28
  -6   3   2   43.55    1.88
   5  -3  -2   77.66    2.69
   5  -3  -2   73.45    2.54
   5  -3  -2   73.84    2.32
   5  -3  -2   76.46    2.47
   5  -3  -2   76.66    2.84
   5  -3  -2   74.54    2.76
   5  -3  -2   74.83    2.75
   5  -3  -2   69.05    2.89
   5  -3  -2   77.77    2.86
   5  -3  -2   74.43    2.63
  -5   3   2   72.79    2.94
  -5   3   2   78.35    2.68
  -5   3   2   78.05    2.84
  -5   3   2   73.83    1.82
  -5   3   2   72.14    2.48
  -5   3   2   77.42    2.79
  -5   3   2   75.31    2.84
  -5   3   2   79.48    2.86
  -5   3   2   73.94    2.39
  -5   3   2   75.23    1.95
   4  -3  -2  106.44    3.56
   4  -3  -2  117.85    3.36
   4  -3  -2  116.62    3.50
   4  -3  -2  109.50    3.41
   4  -3  -2  111.80    3.11
   4  -3  -2  114.14    2.96
   4  -3  -2  109.14    3.35
   4  -3  -2  107.84    3.21
   4  -3  -2  107.75    3.01
   4  -3  -2  110.84    3.35
   4  -3  -2  104.97    2.93
  -4   3   2  110.18    2.93
  -4   3   2  106.27    2.39
  -4   3   2  110.24    3.22
  -4   3   2  108.15    3.41
  -4   3   2  110.63    3.41
  -4   3   2  107.17    3.34
  -4   3   2  110.82    3.05
   3  -3  -2  433.05    8.98
   3  -3  -2  433.26    9.94
   3  -3  -2  446.08    9.45
   3  -3  -2  441.08    9.93
   3  -3  -2  431.54   10.43
   3  -3  -2  446.09    9.92
   3  -3  -2  445.99    9.02
   3  -3  -2  431.82    8.79
   3  -3  -2  422.74    9.01
   3  -3  -2  429.72    9.87
   3  -3  -2  432.57    9.83
   3  -3  -2  430.20    9.16
  -3   3   2  443.29    9.93
  -3   3   2  419.51    9.92
  -3   3   2  438.44    8.79
  -3   3   2  442.75    9.42
  -3   3   2  427.52   10.10
  -3   3   2  417.00   10.41
  -3   3   2  426.60    8.91
   2  -3  -2  196.93    4.21
   2  -3  -2  191.67    4.40
   2  -3  -2  188.29    4.81
   2  -3  -2  184.91    5.07
   2  -3  -2  191.69    4.66
   2  -3  -2  191.16    4.22
   2  -3  -2  183.57    4.72
   2  -3  -2  185.54    4.68
   2  -3  -2  190.98    4.75
   2  -3  -2  191.73    4.45
  -2   3   2  191.53    4.38
  -2   3   2  187.41    4.24
  -2   3   2  192.96    4.72
  -2   3   2  192.21    4.14
  -2   3   2  183.71    4.83
  -2   3   2  190.26    4.83
  -2   3   2  195.16    4.76
  -2   3   2  192.96    4.80
  -2   3   2  191.72    5.00
  -2   3   2  188.68    5.11
  -2   3   2  194.13    4.69
   1  -3  -2  112.02    3.04
   1  -3  -2  105.53    3.24
   1  -3  -2  113.16    3.20
   1  -3  -2  110.64    3.00
   1  -3  -2  112.20    3.05
   1  -3  -2  110.92    2.62
   1  -3  -2  111.70    3.42
   1  -3  -2  106.77    3.13
   1  -3  -2  109.90    2.92
   1  -3  -2  112.04    2.73
   1  -3  -2  113.66    3.25
  -1   3   2  108.75    2.96
  -1   3   2  108.94    3.30
  -1   3   2  107.25    2.66
  -1   3   2  108.67    2.81
  -1   3   2  110.93    2.83
  -1   3   2  112.33    3.10
  -1   3   2  109.79    2.54
  -1   3   2  107.23    3.49
  -1   3   2  106.03    3.36
  -1   3   2  108.91    3.17
  -1   3   2  110.87    3.00
   0  -3  -2    7.69    0.57
   0  -3  -2    9.39    0.98
   0  -3  -2    8.57    0.71
   0  -3  -2    8.29    0.80
   0  -3  -2    8.63    0.73
   0  -3  -2    5.90    0.66
   0  -3  -2    7.10    0.83
   0  -3  -2    7.02    0.70
   0  -3  -2    8.41    0.51
   0  -3  -2    8.16    0.54
   0   3   2    8.20    0.63
   0   3   2    5.94    0.73
   0   3   2    8.07    0.47
   0   3   2    7.84    0.55
   0   3   2    8.88    0.65
   0   3   2    7.28    0.64
   0   3   2    8.55    0.76
   0   3   2    7.32    0.57
   0   3   2    8.91    0.91
  -1  -3  -2   21.38    1.07
  -1  -3  -2   25.47    1.21
  -1  -3  -2   22.24    1.05
  -1  -3  -2   24.42    1.27
  -1  -3  -2   24.11    0.90
  -1  -3  -2   24.38    1.29
  -1  -3  -2   24.06    0.97
  -1  -3  -2   24.81    1.32
  -1  -3  -2   23.31    1.03
  -1  -3  -2   23.37    1.34
   1   3   2   25.58    1.30
   1   3   2   24.32    1.28
   1   3   2   22.86    1.17
   1   3   2   23.40    1.18
   1   3   2   23.97    1.35
   1   3   2   24.70    0.88
   1   3   2   23.15    1.05
   1   3   2   22.70    1.31
   1   3   2   24.15    1.15
  -2  -3  -2   40.95    1.50
  -2  -3  -2   37.93    1.79
  -2  -3  -2   39.40    1.26
  -2  -3  -2   41.82    1.74
  -2  -3  -2   41.20    1.55
  -2  -3  -2   38.32    1.52
  -2  -3  -2   41.22    1.89
  -2  -3  -2   40.78    1.94
  -2  -3  -2   42.40    1.69
  -2  -3  -2   39.10    1.60
   2   3   2   39.61    1.78
   2   3   2   38.65    1.26
   2   3   2   40.78    1.21
   2   3   2   40.18    1.84
   2   3   2   41.91    1.71
   2   3   2   40.05    1.83
   2   3   2   43.41    1.81
   2   3   2   41.38    1.58
  -3  -3  -2  157.48    4.12
  -3  -3  -2  159.27    4.78
  -3  -3  -2  166.77    5.07
  -3  -3  -2  155.56    4.27
  -3  -3  -2  159.62    4.27
  -3  -3  -2  167.13    4.24
  -3  -3  -2  165.08    4.80
  -3  -3  -2  165.26    4.62
   3   3   2  161.80    4.92
   3   3   2  159.20    3.57
   3   3   2  162.70    4.70
   3   3   2  161.05    4.17
   3   3   2  166.83    4.63
   3   3   2  153.91    4.65
   3   3   2  154.54    4.43
   3   3   2  162.80    3.74
  -4  -3  -2  200.79    5.58
  -4  -3  -2  194.13    5.74
  -4  -3  -2  194.25    5.01
   4   3   2  199.47    5.68
   4   3   2  198.22    4.52
   4   3   2  194.67    5.05
   4   3   2  199.71    5.66
   4   3   2  193.20    4.30
   4   3   2  199.13    5.40
   4   3   2  191.21    5.55
   4   3   2  189.87    5.89
  -5  -3  -2  196.71    5.27
  -5  -3  -2  192.05    5.78
   5   3   2  196.93    6.18
   5   3   2  199.23    5.86
   5   3   2  193.88    6.14
   5   3   2  189.64    5.88
   5   3   2  195.72    4.60
   5   3   2  190.62    5.56
   5   3   2  202.65    5.94
   5   3   2  191.52    5.22
  -6  -3  -2  102.99    3.99
  -6  -3  -2   95.56    3.52
   6   3   2   95.23    3.72
   6   3   2  104.42    4.08
   6   3   2  102.29    4.21
   6   3   2  104.70    4.02
   6   3   2  102.17    3.55
   6   3   2  100.78    4.24
  -7  -3  -2   63.70    3.23
  -7  -3  -2   63.57    2.95
   7   3   2   60.06    3.26
   7   3   2   61.80    3.33
   7   3   2   55.56    3.28
   7   3   2   64.68    3.09
   7   3   2   65.09    2.88
   7   3   2   59.89    3.19
  -8  -3  -2   12.99    1.72
   8   3   2    7.40    1.56
   8   3   2   11.23    1.76
   8   3   2   10.48    1.79
   8   3   2    9.78    1.53
  10  -4  -2   53.54    2.96
 -10   4   2   45.59    2.81
   9  -4  -2   39.14    2.18
   9  -4  -2   36.54    2.25
   9  -4  -2   38.49    2.42
  -9   4   2   36.94    2.35
  -9   4   2   37.40    2.20
   8  -4  -2   52.89    2.61
   8  -4  -2   54.22    2.53
   8  -4  -2   52.74    2.15
   8  -4  -2   49.59    2.56
   8  -4  -2   55.08    2.58
   8  -4  -2   50.72    2.46
  -8   4   2   52.17    2.43
  -8   4   2   50.56    2.53
   7  -4  -2   37.03    2.10
   7  -4  -2   41.41    1.91
   7  -4  -2   42.94    1.83
   7  -4  -2   39.97    2.10
   7  -4  -2   40.34    2.04
   7  -4  -2   40.95    2.01
   7  -4  -2   39.38    2.26
   7  -4  -2   40.75    2.11
  -7   4   2   39.45    2.05
  -7   4   2   41.45    1.98
   6  -4  -2   30.38    1.53
   6  -4  -2   27.61    1.78
   6  -4  -2   27.37    1.40
   6  -4  -2   29.37    1.53
   6  -4  -2   26.70    1.62
   6  -4  -2   27.62    1.86
   6  -4  -2   29.96    1.69
   6  -4  -2   26.16    1.70
   6  -4  -2   26.86    1.65
  -6   4   2   31.97    1.59
  -6   4   2   32.94    1.69
  -6   4   2   28.70    0.97
  -6   4   2   27.89    1.87
  -6   4   2   27.01    1.74
  -6   4   2   28.62    1.75
  -6   4   2   27.70    1.80
   5  -4  -2    0.29    0.22
   5  -4  -2    3.04    0.62
   5  -4  -2    0.99    0.37
   5  -4  -2    1.58    0.51
   5  -4  -2    1.22    0.49
   5  -4  -2    0.89    0.41
   5  -4  -2    2.12    0.47
   5  -4  -2    1.03    0.45
   5  -4  -2    0.60    0.41
   5  -4  -2    0.83    0.40
   5  -4  -2    0.76    0.43
  -5   4   2    1.75    0.56
  -5   4   2    1.44    0.41
  -5   4   2    1.27    0.48
  -5   4   2    1.10    0.42
  -5   4   2    1.69    0.55
  -5   4   2    0.91    0.45
  -5   4   2    1.75    0.57
  -5   4   2    1.51    0.25
   4  -4  -2   23.33    1.38
   4  -4  -2   26.61    1.26
   4  -4  -2   26.69    1.38
   4  -4  -2   28.09    1.28
   4  -4  -2   24.18    1.37
   4  -4  -2   22.47    1.20
   4  -4  -2   25.02    1.44
   4  -4  -2   24.52    1.39
   4  -4  -2   28.65    1.48
   4  -4  -2   25.31    1.56
   4  -4  -2   25.10    0.80
   4  -4  -2   25.65    1.48
  -4   4   2   26.66    1.44
  -4   4   2   23.89    1.26
  -4   4   2   26.82    1.53
  -4   4   2   23.55    1.51
  -4   4   2   25.30    1.46
  -4   4   2   24.89    1.21
  -4   4   2   25.75    1.46
   3  -4  -2   14.27    1.10
   3  -4  -2   13.41    0.94
   3  -4  -2   13.96    0.97
   3  -4  -2   12.78    0.99
   3  -4  -2   13.06    0.97
   3  -4  -2   16.40    0.99
   3  -4  -2   15.41    1.09
   3  -4  -2   14.55    1.02
   3  -4  -2   14.66    0.62
   3  -4  -2   15.85    0.90
   3  -4  -2   13.14    0.81
  -3   4   2   14.76    1.10
  -3   4   2   15.05    1.03
  -3   4   2   14.69    1.12
  -3   4   2   14.82    1.05
  -3   4   2   14.20    1.03
  -3   4   2   14.68    0.85
  -3   4   2   13.94    0.88
  -3   4   2   16.62    1.21
   2  -4  -2   91.91    2.83
   2  -4  -2   94.26    2.83
   2  -4  -2   93.08    2.72
   2  -4  -2   97.07    3.02
   2  -4  -2   92.26    3.03
   2  -4  -2   94.72    2.53
   2  -4  -2   91.11    2.90
   2  -4  -2   92.34    2.61
   2  -4  -2   92.55    2.91
  -2   4   2   97.21    2.92
  -2   4   2   97.02    2.48
  -2   4   2   91.17    2.84
  -2   4   2   95.90    2.62
  -2   4   2   95.68    2.48
  -2   4   2   90.58    3.18
  -2   4   2  100.48    3.08
  -2   4   2   92.90    2.97
  -2   4   2   97.09    3.36
   1  -4  -2  138.22    3.90
   1  -4  -2  143.12    4.19
   1  -4  -2  142.70    3.82
   1  -4  -2  144.24    4.01
   1  -4  -2  140.22    3.72
   1  -4  -2  131.50    4.05
   1  -4  -2  145.97    3.61
   1  -4  -2  138.67    3.94
   1  -4  -2  142.69    4.32
   1  -4  -2  146.76    3.47
   1  -4  -2  147.50    4.54
  -1   4   2  144.20    3.69
  -1   4   2  146.23    3.97
  -1   4   2  142.54    3.51
  -1   4   2  143.03    4.48
  -1   4   2  146.85    4.24
  -1   4   2  141.99    4.09
  -1   4   2  145.90    3.34
  -1   4   2  148.15    3.93
   0  -4  -2  394.27    8.47
   0  -4  -2  375.46    8.51
   0  -4  -2  386.21    9.07
   0  -4  -2  391.08    8.39
   0  -4  -2  383.35    7.95
   0  -4  -2  376.78    9.84
   0  -4  -2  381.59    8.81
   0  -4  -2  381.69    9.13
   0  -4  -2  378.24    9.39
   0  -4  -2  383.88    9.53
   0   4   2  378.82    9.35
   0   4   2  368.92    9.21
   0   4   2  377.47    9.40
   0   4   2  372.19    8.25
   0   4   2  396.51    8.80
   0   4   2  389.35    8.92
   0   4   2  386.65    8.03
   0   4   2  377.75    9.36
   0   4   2  376.39    7.68
   0   4   2  373.19    9.05
  -1  -4  -2  207.11    5.71
  -1  -4  -2  206.15    5.18
  -1  -4  -2  213.85    5.32
  -1  -4  -2  208.29    5.74
  -1  -4  -2  205.65    5.12
  -1  -4  -2  208.64    5.05
  -1  -4  -2  208.96    4.89
  -1  -4  -2  212.44    5.68
  -1  -4  -2  209.76    5.98
   1   4   2  210.46    5.50
   1   4   2  211.61    4.92
   1   4   2  205.31    5.60
   1   4   2  207.40    5.79
   1   4   2  204.30    5.83
   1   4   2  201.92    5.49
   1   4   2  201.18    5.79
   1   4   2  199.12    4.51
  -2  -4  -2  134.64    4.12
  -2  -4  -2  127.86    3.79
  -2  -4  -2  133.29    4.45
  -2  -4  -2  128.51    3.63
  -2  -4  -2  129.63    3.81
  -2  -4  -2  142.49    4.40
  -2  -4  -2  124.45    4.09
  -2  -4  -2  120.98    3.60
  -2  -4  -2  132.29    3.08
  -2  -4  -2  130.91    3.60
   2   4   2  133.19    3.09
   2   4   2  131.76    4.29
   2   4   2  133.10    3.63
   2   4   2  127.52    3.17
   2   4   2  128.50    4.22
   2   4   2  136.97    4.28
   2   4   2  131.49    4.03
   2   4   2  135.64    4.09
  -3  -4  -2   46.17    2.22
  -3  -4  -2   49.04    2.43
  -3  -4  -2   51.03    2.08
  -3  -4  -2   50.54    1.50
  -3  -4  -2   49.38    2.16
   3   4   2   49.45    2.42
   3   4   2   49.86    1.66
   3   4   2   48.94    1.54
   3   4   2   51.77    2.30
   3   4   2   50.71    2.39
   3   4   2   49.66    2.40
   3   4   2   54.85    2.13
  -4  -4  -2   12.44    1.40
  -4  -4  -2   16.17    1.38
  -4  -4  -2   15.86    1.23
   4   4   2   16.37    1.48
   4   4   2   17.21    1.73
   4   4   2   13.86    1.47
   4   4   2   14.51    1.38
   4   4   2   12.53    1.42
   4   4   2   17.14    1.40
   4   4   2   14.69    0.90
   4   4   2    9.67    1.32
  -5  -4  -2    5.42    0.94
  -5  -4  -2    4.35    0.86
   5   4   2    3.39    0.87
   5   4   2    2.71    0.96
   5   4   2    3.04    0.84
   5   4   2    4.58    0.85
   5   4   2    2.57    0.81
   5   4   2    2.60    0.74
  -6  -4  -2    4.90    1.01
  -6  -4  -2    9.83    1.54
   6   4   2    6.15    1.15
   6   4   2    6.11    1.17
   6   4   2    9.21    1.25
   6   4   2    8.62    1.41
   6   4   2    6.57    1.38
   6   4   2    7.75    1.35
  -7  -4  -2   19.26    1.94
   7   4   2   19.56    2.12
   7   4   2   20.48    2.19
   7   4   2   21.13    2.50
   7   4   2   15.52    2.21
  -8  -4  -2   32.86    2.48
   8   4   2   28.94    2.56
   8   4   2   30.67    2.46
   8   4   2   34.56    2.95
  10  -5  -2   -0.13    0.75
 -10   5   2    0.29    0.75
   9  -5  -2    1.21    0.72
   9  -5  -2    3.79    0.98
   9  -5  -2    2.47    0.81
   9  -5  -2    3.38    0.96
  -9   5   2    1.53    0.75
  -9   5   2    1.17    0.66
   8  -5  -2    3.45    0.85
   8  -5  -2    4.41    0.95
   8  -5  -2    4.32    0.91
   8  -5  -2    5.14    0.84
   8  -5  -2    5.25    1.03
  -8   5   2    5.49    1.02
  -8   5   2    4.79    0.89
   7  -5  -2   28.71    1.84
   7  -5  -2   25.84    1.73
   7  -5  -2   27.89    1.55
   7  -5  -2   28.42    1.66
   7  -5  -2   28.23    1.87
   7  -5  -2   28.88    2.00
  -7   5   2   27.44    1.75
  -7   5   2   26.67    1.64
   6  -5  -2   29.44    1.58
   6  -5  -2   31.13    1.86
   6  -5  -2   25.83    1.92
   6  -5  -2   30.53    1.80
   6  -5  -2   29.35    1.88
   6  -5  -2   27.00    1.52
   6  -5  -2   29.30    1.76
   6  -5  -2   27.96    1.73
   6  -5  -2   31.66    1.59
  -6   5   2   28.33    1.93
  -6   5   2   28.84    1.87
  -6   5   2   27.45    1.55
  -6   5   2   29.82    1.68
  -6   5   2   26.45    1.76
   5  -5  -2  101.67    3.17
   5  -5  -2  104.27    3.58
   5  -5  -2  101.61    3.24
   5  -5  -2  102.83    3.51
   5  -5  -2   95.74    3.53
   5  -5  -2  109.45    3.23
   5  -5  -2  102.40    3.90
   5  -5  -2  103.39    3.66
   5  -5  -2  105.98    3.72
   5  -5  -2  100.46    3.35
   5  -5  -2  100.62    3.55
  -5   5   2  102.99    3.26
  -5   5   2  112.74    4.01
  -5   5   2  112.50    3.81
  -5   5   2  102.52    3.10
  -5   5   2  103.93    3.77
  -5   5   2  104.61    2.58
  -5   5   2  105.39    3.61
  -5   5   2  105.54    3.50
  -5   5   2  104.02    3.68
   4  -5  -2   69.39    2.53
   4  -5  -2   66.88    2.33
   4  -5  -2   67.98    2.57
   4  -5  -2   67.16    2.62
   4  -5  -2   61.60    2.62
   4  -5  -2   64.47    2.33
   4  -5  -2   67.03    2.86
   4  -5  -2   66.78    2.61
   4  -5  -2   59.01    2.55
   4  -5  -2   67.36    2.65
  -4   5   2   64.92    2.32
  -4   5   2   70.41    2.84
  -4   5   2   69.25    2.60
  -4   5   2   63.93    2.62
  -4   5   2   69.11    2.24
  -4   5   2   67.09    2.72
  -4   5   2   67.90    2.60
  -4   5   2   66.46    2.86
   3  -5  -2  109.62    3.86
   3  -5  -2  105.98    3.60
   3  -5  -2  105.18    3.01
   3  -5  -2  108.13    3.37
   3  -5  -2  108.61    3.39
   3  -5  -2  115.17    3.56
   3  -5  -2  106.34    3.14
   3  -5  -2  112.32    3.25
   3  -5  -2  107.35    3.52
   3  -5  -2  109.44    3.53
  -3   5   2  108.49    3.11
  -3   5   2  111.74    2.98
  -3   5   2  107.30    3.80
  -3   5   2  109.67    3.57
  -3   5   2  111.93    3.66
  -3   5   2  104.99    3.41
  -3   5   2  104.91    3.84
  -3   5   2  108.70    3.55
   2  -5  -2  142.36    4.46
   2  -5  -2  140.84    4.73
   2  -5  -2  144.94    3.68
   2  -5  -2  145.31    4.56
   2  -5  -2  146.12    4.35
   2  -5  -2  144.00    4.25
   2  -5  -2  146.82    3.86
   2  -5  -2  144.91    4.15
   2  -5  -2  146.70    4.11
   2  -5  -2  148.55    4.27
   2  -5  -2  146.71    3.98
  -2   5   2  146.54    4.36
  -2   5   2  144.60    3.70
  -2   5   2  144.05    4.66
  -2   5   2  142.66    3.57
  -2   5   2  145.16    4.89
  -2   5   2  142.45    4.22
  -2   5   2  146.49    3.77
  -2   5   2  152.58    4.51
  -2   5   2  140.26    4.13
   1  -5  -2   45.38    2.12
   1  -5  -2   45.56    2.02
   1  -5  -2   47.21    1.72
   1  -5  -2   43.59    2.14
   1  -5  -2   45.60    1.82
   1  -5  -2   44.30    2.07
   1  -5  -2   45.82    2.37
   1  -5  -2   42.66    2.21
   1  -5  -2   45.95    1.70
   1  -5  -2   43.27    1.98
   1  -5  -2   43.05    1.88
  -1   5   2   45.25    2.36
  -1   5   2   47.13    2.23
  -1   5   2   47.12    1.99
  -1   5   2   45.17    1.56
  -1   5   2   45.15    1.78
  -1   5   2   43.00    1.69
  -1   5   2   43.19    2.08
  -1   5   2   44.21    1.80
  -1   5   2   45.99    1.92
   0  -5  -2   41.72    2.00
   0  -5  -2   42.02    2.05
   0  -5  -2   43.16    2.23
   0  -5  -2   39.92    1.74
   0  -5  -2   42.48    1.66
   0  -5  -2   41.76    2.00
   0  -5  -2   43.21    1.70
   0  -5  -2   45.01    2.39
   0  -5  -2   42.55    2.15
   0  -5  -2   43.53    1.92
   0   5   2   42.60    1.64
   0   5   2   40.29    1.95
   0   5   2   41.13    2.13
   0   5   2   39.85    1.85
   0   5   2   44.89    2.08
   0   5   2   42.58    1.91
   0   5   2   40.63    2.19
   0   5   2   43.74    1.72
   0   5   2   41.53    1.47
   0   5   2   42.01    2.23
  -1  -5  -2    2.80    0.56
  -1  -5  -2    3.83    0.62
  -1  -5  -2    2.91    0.70
  -1  -5  -2    3.51    0.74
  -1  -5  -2    3.18    0.71
  -1  -5  -2    5.64    0.99
  -1  -5  -2    4.57    0.84
  -1  -5  -2    3.66    0.61
  -1  -5  -2    4.36    0.79
   1   5   2    2.51    0.71
   1   5   2    3.53    0.73
   1   5   2    4.39    0.68
   1   5   2    4.29    0.78
   1   5   2    3.60    0.78
   1   5   2    3.75    0.69
   1   5   2    3.66    0.51
   1   5   2    3.88    0.78
  -2  -5  -2    9.91    1.11
  -2  -5  -2    9.10    1.30
  -2  -5  -2   10.02    1.15
  -2  -5  -2    9.97    0.99
  -2  -5  -2   10.61    1.34
   2   5   2   10.18    1.31
   2   5   2    8.82    1.17
   2   5   2    9.78    1.03
   2   5   2    9.25    0.66
   2   5   2    9.55    1.21
   2   5   2    8.14    1.07
   2   5   2    9.15    1.26
   2   5   2    9.70    0.73
  -3  -5  -2   55.01    2.41
  -3  -5  -2   56.78    2.71
  -3  -5  -2   55.16    2.50
  -3  -5  -2   49.87    2.71
   3   5   2   55.80    2.32
   3   5   2   57.37    2.82
   3   5   2   60.09    2.91
   3   5   2   52.82    2.72
   3   5   2   55.19    1.86
   3   5   2   59.65    2.70
   3   5   2   55.03    2.80
  -4  -5  -2   84.13    3.26
  -4  -5  -2   91.92    3.75
   4   5   2   87.64    3.77
   4   5   2   95.01    3.75
   4   5   2   90.23    3.25
   4   5   2   88.25    3.92
   4   5   2   90.52    3.86
   4   5   2   90.05    3.57
  -5  -5  -2  155.83    5.51
  -5  -5  -2  151.95    4.97
   5   5   2  160.49    4.85
   5   5   2  164.17    5.55
   5   5   2  157.59    5.82
   5   5   2  159.84    5.66
   5   5   2  146.94    5.16
   5   5   2  157.44    5.72
  -6  -5  -2  102.57    3.99
  -6  -5  -2   88.97    4.16
   6   5   2   91.01    4.30
   6   5   2   95.43    4.23
   6   5   2  102.31    4.71
   6   5   2   95.82    4.10
   6   5   2   91.52    3.74
  -7  -5  -2   74.38    3.58
   7   5   2   69.39    3.88
   7   5   2   74.55    3.91
   7   5   2   78.16    3.79
   7   5   2   69.59    4.11
  10  -6  -2   53.77    3.13
 -10   6   2   53.36    3.09
   9  -6  -2   53.97    2.96
   9  -6  -2   51.68    2.75
   9  -6  -2   56.29    3.04
   9  -6  -2   53.60    2.88
  -9   6   2   60.45    2.83
  -9   6   2   57.28    2.93
   8  -6  -2   38.85    2.16
   8  -6  -2   44.37    2.43
   8  -6  -2   41.15    2.08
   8  -6  -2   38.28    2.31
   8  -6  -2   42.18    2.44
  -8   6   2   40.23    2.19
  -8   6   2   47.79    2.48
   7  -6  -2   28.93    1.73
   7  -6  -2   27.61    1.95
   7  -6  -2   29.13    1.94
   7  -6  -2   27.18    1.63
   7  -6  -2   29.34    2.02
  -7   6   2   28.08    1.83
  -7   6   2   30.37    1.78
   6  -6  -2   13.77    1.30
   6  -6  -2   11.55    0.77
   6  -6  -2    9.06    1.24
   6  -6  -2   12.81    1.51
   6  -6  -2   12.86    1.42
   6  -6  -2   13.25    1.45
   6  -6  -2   11.54    1.17
  -6   6   2   11.93    1.50
  -6   6   2    9.75    1.07
  -6   6   2   10.86    1.24
   5  -6  -2    0.23    0.38
   5  -6  -2    0.22    0.44
   5  -6  -2    0.50    0.46
   5  -6  -2   -0.03    0.44
   5  -6  -2    0.89    0.54
   5  -6  -2   -0.08    0.32
   5  -6  -2    0.61    0.42
   5  -6  -2    1.86    0.61
   5  -6  -2    0.91    0.46
  -5   6   2    0.87    0.54
  -5   6   2    0.57    0.53
  -5   6   2    0.51    0.40
  -5   6   2    0.01    0.45
  -5   6   2    0.59    0.37
  -5   6   2    0.00    0.39
  -5   6   2    0.51    0.44
  -5   6   2    0.72    0.41
   4  -6  -2    7.37    1.03
   4  -6  -2    6.09    0.92
   4  -6  -2    5.87    1.00
   4  -6  -2    5.42    0.88
   4  -6  -2    6.17    0.99
   4  -6  -2    6.10    0.99
   4  -6  -2    7.57    1.21
   4  -6  -2    6.75    0.89
   4  -6  -2    6.10    0.79
  -4   6   2    6.59    1.11
  -4   6   2    5.49    0.98
  -4   6   2    6.44    0.98
  -4   6   2    4.68    0.83
  -4   6   2    6.48    0.77
  -4   6   2    8.30    0.97
  -4   6   2    9.82    1.27
   3  -6  -2   13.58    1.13
   3  -6  -2   14.25    1.27
   3  -6  -2   16.87    1.54
   3  -6  -2   14.91    1.14
   3  -6  -2   15.33    1.04
   3  -6  -2   15.42    1.24
   3  -6  -2   10.44    1.21
   3  -6  -2   18.26    1.98
  -3   6   2   17.22    1.04
  -3   6   2   15.50    1.65
  -3   6   2   13.78    1.06
  -3   6   2   17.46    1.34
  -3   6   2   14.77    0.83
  -3   6   2   12.25    1.32
  -3   6   2   13.85    1.57
  -3   6   2   13.33    1.13
   2  -6  -2  123.14    4.36
   2  -6  -2  119.74    4.51
   2  -6  -2  116.24    3.91
   2  -6  -2  121.49    3.80
   2  -6  -2  123.65    3.58
   2  -6  -2  128.40    3.81
   2  -6  -2  119.52    4.12
   2  -6  -2  122.31    4.01
   2  -6  -2  124.94    4.07
   2  -6  -2  124.70    4.25
  -2   6   2  125.03    3.92
  -2   6   2  123.22    3.46
  -2   6   2  116.15    4.06
  -2   6   2  122.45    4.25
  -2   6   2  124.55    3.32
  -2   6   2  119.73    4.43
  -2   6   2  126.64    3.56
   1  -6  -2   85.55    3.21
   1  -6  -2   81.48    3.12
   1  -6  -2   80.43    3.42
   1  -6  -2   83.45    3.61
   1  -6  -2   76.97    2.63
   1  -6  -2   74.97    3.04
   1  -6  -2   82.48    2.85
   1  -6  -2   80.01    3.27
   1  -6  -2   81.08    2.92
   1  -6  -2   81.96    3.27
  -1   6   2   76.58    3.01
  -1   6   2   84.42    3.40
  -1   6   2   82.76    2.67
  -1   6   2   76.40    2.73
  -1   6   2   79.44    2.74
  -1   6   2   82.45    2.44
  -1   6   2   77.17    2.92
  -1   6   2   83.71    3.60
  -1   6   2   76.48    3.18
   0  -6  -2   72.67    3.45
   0  -6  -2   74.41    3.24
   0  -6  -2   77.58    3.08
   0  -6  -2   76.09    2.88
   0  -6  -2   70.47    3.04
   0  -6  -2   76.09    2.75
   0  -6  -2   77.97    3.09
   0  -6  -2   72.59    2.56
   0  -6  -2   78.37    3.38
   0   6   2   78.76    2.96
   0   6   2   75.36    3.33
   0   6   2   72.89    3.22
   0   6   2   73.10    2.43
   0   6   2   69.52    2.80
   0   6   2   71.91    2.55
   0   6   2   77.32    2.31
   0   6   2   77.68    3.42
   0   6   2   75.49    3.04
  -1  -6  -2   91.62    3.82
  -1  -6  -2   94.85    3.64
  -1  -6  -2   93.34    3.10
  -1  -6  -2   90.53    3.32
  -1  -6  -2   91.78    3.46
  -1  -6  -2   89.81    3.84
   1   6   2   94.75    3.08
   1   6   2   91.13    3.84
   1   6   2   92.71    3.51
   1   6   2   93.83    3.76
   1   6   2   95.77    3.90
   1   6   2   89.51    2.64
   1   6   2   94.54    3.66
   1   6   2   93.45    3.86
   1   6   2   89.94    3.38
  -2  -6  -2   74.99    3.41
  -2  -6  -2   77.03    3.07
  -2  -6  -2   66.95    2.94
   2   6   2   71.10    3.41
   2   6   2   71.38    2.28
   2   6   2   74.42    3.27
   2   6   2   69.40    3.37
   2   6   2   76.22    3.32
   2   6   2   71.56    3.26
   2   6   2   79.15    2.81
  -3  -6  -2   85.21    3.37
  -3  -6  -2   85.06    3.39
  -3  -6  -2   85.56    3.76
   3   6   2   79.67    2.50
   3   6   2   84.16    3.14
   3   6   2   83.69    3.76
   3   6   2   83.62    3.85
   3   6   2   84.60    3.65
   3   6   2   88.83    3.79
  -4  -6  -2   32.24    2.12
  -4  -6  -2   31.84    2.32
   4   6   2   28.61    2.23
   4   6   2   28.60    1.86
   4   6   2   35.25    2.48
   4   6   2   31.33    2.25
   4   6   2   31.22    2.39
   4   6   2   30.85    2.19
  -5  -6  -2    5.27    1.13
  -5  -6  -2    4.24    1.17
   5   6   2    5.65    1.26
   5   6   2    4.64    0.99
   5   6   2    4.10    1.24
   5   6   2    4.50    1.13
   5   6   2    5.06    1.35
   5   6   2    5.75    1.28
  -6  -6  -2    1.44    0.83
   6   6   2   -0.20    0.70
   6   6   2    0.19    0.66
   6   6   2    0.20    0.85
   6   6   2   -0.78    0.61
  10  -7  -2    0.85    0.93
  10  -7  -2    0.92    0.94
 -10   7   2    2.15    1.01
   9  -7  -2    4.32    1.14
   9  -7  -2    4.38    1.13
   9  -7  -2    2.75    1.05
  -9   7   2    3.64    1.07
   8  -7  -2    1.35    0.69
   8  -7  -2    2.70    0.93
   8  -7  -2    1.64    0.76
  -8   7   2    2.66    0.82
  -8   7   2    1.07    0.70
   7  -7  -2   13.38    1.60
   7  -7  -2   13.74    1.66
   7  -7  -2   16.18    1.55
   7  -7  -2   14.56    1.46
  -7   7   2   12.84    1.34
  -7   7   2   15.66    1.65
   6  -7  -2   24.17    1.78
   6  -7  -2   22.15    1.79
   6  -7  -2   21.89    1.49
   6  -7  -2   16.07    1.65
   6  -7  -2   23.64    1.59
  -6   7   2   18.06    1.38
  -6   7   2   23.16    1.62
   5  -7  -2   41.73    2.08
   5  -7  -2   38.43    2.18
   5  -7  -2   37.28    2.21
   5  -7  -2   37.75    2.26
  -5   7   2   40.98    2.04
  -5   7   2   37.65    1.83
  -5   7   2   37.57    2.40
  -5   7   2   39.22    2.40
  -5   7   2   36.61    2.49
   4  -7  -2   65.13    2.82
   4  -7  -2   72.95    3.17
   4  -7  -2   72.71    3.28
   4  -7  -2   71.54    2.67
   4  -7  -2   67.64    2.76
  -4   7   2   67.49    3.30
  -4   7   2   73.37    2.54
  -4   7   2   72.72    2.72
  -4   7   2   77.44    3.33
  -4   7   2   67.06    3.38
   3  -7  -2   74.20    3.19
   3  -7  -2   69.30    2.61
   3  -7  -2   74.24    3.51
   3  -7  -2   74.78    2.88
   3  -7  -2   72.48    3.22
   3  -7  -2   74.11    3.07
   3  -7  -2   68.77    2.82
   3  -7  -2   74.62    3.15
  -3   7   2   73.39    3.43
  -3   7   2   70.28    3.11
  -3   7   2   73.42    2.48
  -3   7   2   69.27    3.49
  -3   7   2   69.12    3.17
  -3   7   2   70.98    2.31
  -3   7   2   70.24    2.91
  -3   7   2   69.18    2.64
   2  -7  -2  122.08    4.31
   2  -7  -2  119.54    3.68
   2  -7  -2  121.61    4.43
   2  -7  -2  109.31    3.82
   2  -7  -2  111.87    4.12
   2  -7  -2  117.33    4.51
   2  -7  -2  118.05    4.11
   2  -7  -2  117.18    4.70
   2  -7  -2  121.29    3.94
   2  -7  -2  112.48    4.10
  -2   7   2  118.69    4.03
  -2   7   2  114.94    3.53
  -2   7   2  120.38    3.38
  -2   7   2  118.76    4.32
  -2   7   2  118.42    4.43
  -2   7   2  116.81    3.62
  -2   7   2  121.87    4.69
   1  -7  -2   86.79    3.83
   1  -7  -2   87.62    3.32
   1  -7  -2   87.93    4.00
   1  -7  -2   87.14    3.62
   1  -7  -2   89.88    3.05
   1  -7  -2   87.94    3.72
   1  -7  -2   88.11    3.51
   1  -7  -2   89.18    3.59
  -1   7   2   86.68    3.15
  -1   7   2   90.23    3.03
  -1   7   2   91.46    3.10
  -1   7   2   90.31    3.73
  -1   7   2   94.56    4.09
  -1   7   2   84.80    2.70
  -1   7   2   93.96    3.89
  -1   7   2   88.37    3.37
   0  -7  -2   42.45    2.54
   0  -7  -2   43.24    2.01
   0  -7  -2   35.46    2.22
   0  -7  -2   44.72    2.31
   0  -7  -2   47.07    2.73
   0   7   2   45.92    2.30
   0   7   2   47.03    1.91
   0   7   2   46.20    2.71
   0   7   2   43.71    1.75
   0   7   2   45.59    2.75
   0   7   2   44.74    2.05
   0   7   2   43.73    2.61
  -1  -7  -2   11.69    1.44
  -1  -7  -2    9.26    1.36
  -1  -7  -2    9.82    1.15
  -1  -7  -2   11.38    1.56
   1   7   2    9.34    0.89
   1   7   2    9.05    1.41
   1   7   2    8.89    1.39
   1   7   2    9.31    1.50
   1   7   2   10.93    1.65
   1   7   2    9.91    1.57
   1   7   2    9.35    1.13
   1   7   2    9.37    1.29
  -2  -7  -2    0.31    0.54
  -2  -7  -2   -0.29    0.56
  -2  -7  -2    0.11    0.59
   2   7   2    0.70    0.36
   2   7   2    0.00    0.44
   2   7   2    0.08    0.40
   2   7   2    0.31    0.59
   2   7   2    0.55    0.63
   2   7   2    0.69    0.60
  -3  -7  -2   28.14    2.09
  -3  -7  -2   25.25    2.25
  -3  -7  -2   21.46    2.11
   3   7   2   24.94    2.06
   3   7   2   28.63    2.28
   3   7   2   28.16    2.30
   3   7   2   26.68    2.32
   3   7   2   28.24    1.81
  -4  -7  -2   48.30    3.13
  -4  -7  -2   54.41    2.97
   4   7   2   48.80    3.18
   4   7   2   45.08    2.97
   4   7   2   50.03    3.05
   4   7   2   48.13    2.91
   4   7   2   47.14    2.47
  -5  -7  -2   79.30    3.79
   5   7   2   82.89    4.21
   5   7   2   78.91    4.07
   5   7   2   86.50    4.49
   5   7   2   78.52    3.93
  -6  -7  -2   78.39    3.94
   6   7   2   78.26    4.14
   6   7   2   78.69    4.62
   6   7   2   77.19    4.56
   9  -8  -2   59.14    3.17
   9  -8  -2   64.43    3.47
   9  -8  -2   67.52    3.41
  -9   8   2   66.17    3.32
   8  -8  -2   48.51    2.83
   8  -8  -2   50.58    2.61
   8  -8  -2   49.65    2.95
  -8   8   2   52.30    2.64
  -8   8   2   50.59    2.77
   7  -8  -2   13.60    1.52
   7  -8  -2   15.78    1.78
   7  -8  -2   10.06    1.50
   7  -8  -2   16.42    1.64
  -7   8   2   14.41    1.45
  -7   8   2   14.27    1.66
   6  -8  -2    4.91    0.96
   6  -8  -2    6.25    1.26
   6  -8  -2    6.50    1.17
   6  -8  -2    4.94    0.95
  -6   8   2    5.54    1.02
  -6   8   2    4.93    0.89
   5  -8  -2    6.51    1.22
   5  -8  -2    6.26    1.17
   5  -8  -2    5.28    0.98
   5  -8  -2    6.70    1.19
  -5   8   2    5.85    0.98
  -5   8   2    5.48    1.25
  -5   8   2    6.46    0.97
   4  -8  -2    4.42    0.96
   4  -8  -2    3.34    0.92
   4  -8  -2    3.79    0.94
  -4   8   2    3.73    0.91
  -4   8   2    3.47    0.99
  -4   8   2    4.74    0.80
  -4   8   2    3.56    0.77
   3  -8  -2   10.76    1.44
   3  -8  -2   11.60    1.56
   3  -8  -2   12.46    1.42
  -3   8   2   11.98    0.97
  -3   8   2   14.13    1.25
  -3   8   2   13.27    1.77
  -3   8   2   11.30    1.28
  -3   8   2   17.24    2.13
   2  -8  -2   28.38    2.23
   2  -8  -2   30.78    2.12
   2  -8  -2   31.25    2.00
   2  -8  -2   34.22    2.25
  -2   8   2   30.70    1.77
  -2   8   2   25.84    2.19
  -2   8   2   28.31    2.21
  -2   8   2   29.56    1.66
  -2   8   2   30.82    1.87
  -2   8   2   30.11    1.57
   1  -8  -2   40.92    2.31
   1  -8  -2   37.27    2.59
   1  -8  -2   40.97    2.46
   1  -8  -2   39.53    2.50
  -1   8   2   42.83    2.73
  -1   8   2   37.16    1.99
  -1   8   2   40.10    2.74
  -1   8   2   41.41    1.80
  -1   8   2   37.39    1.97
  -1   8   2   39.29    2.13
   0  -8  -2   24.55    1.88
   0  -8  -2   26.84    2.70
   0  -8  -2   25.21    2.00
   0   8   2   30.06    2.44
   0   8   2   29.13    1.48
   0   8   2   23.67    1.79
   0   8   2   25.08    1.46
   0   8   2   25.67    2.19
   0   8   2   26.03    1.68
  -1  -8  -2   66.14    3.12
  -1  -8  -2   63.16    3.51
  -1  -8  -2   62.80    3.22
   1   8   2   64.51    3.64
   1   8   2   61.78    3.14
   1   8   2   65.59    3.58
   1   8   2   61.85    3.23
   1   8   2   59.16    2.65
  -2  -8  -2   76.32    3.69
  -2  -8  -2   76.92    3.53
  -2  -8  -2   86.19    4.21
   2   8   2   72.49    3.69
   2   8   2   81.75    4.10
   2   8   2   80.45    3.19
   2   8   2   79.65    3.83
   2   8   2   76.71    4.04
  -3  -8  -2   43.42    2.70
  -3  -8  -2   44.03    3.14
  -3  -8  -2   37.43    2.67
   3   8   2   38.30    2.84
   3   8   2   43.07    2.85
   3   8   2   42.28    2.30
   3   8   2   39.80    2.88
  -4  -8  -2   30.21    2.79
   4   8   2   34.25    3.36
   4   8   2   29.39    2.47
   4   8   2   31.45    2.71
   4   8   2   34.27    2.64
  -5  -8  -2   19.03    2.39
   5   8   2   17.95    2.41
   5   8   2   14.38    2.46
   5   8   2   10.63    2.09
   9  -9  -2    0.79    0.89
   9  -9  -2    1.16    0.95
  -9   9   2    0.62    0.87
   8  -9  -2    1.73    0.86
   8  -9  -2    1.08    0.90
  -8   9   2    2.59    0.93
  -8   9   2    2.18    0.95
   7  -9  -2   10.26    1.67
   7  -9  -2   12.01    1.58
  -7   9   2   15.06    1.79
  -7   9   2   14.45    1.58
   6  -9  -2   39.51    2.59
   6  -9  -2   38.34    2.26
   6  -9  -2   36.27    2.29
  -6   9   2   38.12    2.32
  -6   9   2   36.94    2.09
   5  -9  -2   58.94    2.88
   5  -9  -2   65.11    3.28
  -5   9   2   54.15    2.48
  -5   9   2   58.23    2.78
   4  -9  -2   85.72    3.78
   4  -9  -2   75.62    3.38
   4  -9  -2   83.28    3.85
  -4   9   2   85.76    3.34
  -4   9   2   79.04    4.14
  -4   9   2   84.80    3.05
   3  -9  -2   70.86    3.40
   3  -9  -2   62.01    3.05
   3  -9  -2   64.33    3.37
  -3   9   2   65.47    3.71
  -3   9   2   66.55    2.60
  -3   9   2   70.37    2.62
  -3   9   2   71.41    2.98
   2  -9  -2   54.99    3.06
   2  -9  -2   50.16    2.91
   2  -9  -2   48.71    3.14
   2  -9  -2   57.22    2.90
  -2   9   2   54.81    2.48
  -2   9   2   54.18    3.34
  -2   9   2   54.24    2.64
  -2   9   2   50.20    2.19
  -2   9   2   50.97    2.49
   1  -9  -2   36.10    2.54
   1  -9  -2   36.90    2.40
   1  -9  -2   33.28    2.61
   1  -9  -2   41.73    2.65
  -1   9   2   33.87    2.89
  -1   9   2   36.05    2.19
  -1   9   2   35.47    2.76
  -1   9   2   38.34    1.85
  -1   9   2   38.80    2.13
   0  -9  -2   20.45    2.31
   0  -9  -2   23.99    2.64
   0  -9  -2   16.57    1.87
   0  -9  -2   25.25    2.47
   0   9   2   21.96    1.66
   0   9   2   22.01    1.85
   0   9   2   23.29    2.65
  -1  -9  -2    5.60    1.28
  -1  -9  -2    6.90    1.32
  -1  -9  -2    5.22    1.42
   1   9   2    5.40    1.41
   1   9   2    7.95    1.48
   1   9   2    4.89    1.01
  -2  -9  -2    0.20    0.66
  -2  -9  -2    0.47    0.80
   2   9   2    0.02    0.54
   2   9   2   -0.27    0.44
   2   9   2    0.37    0.81
   2   9   2   -0.63    0.65
  -3  -9  -2    5.81    1.38
  -3  -9  -2    8.41    1.72
   3   9   2    7.01    1.58
   3   9   2    4.67    1.44
  -4  -9  -2   20.82    2.60
   4   9   2   13.44    2.18
   4   9   2   12.49    2.17
   8 -10  -2   52.52    3.33
   8 -10  -2   51.07    2.96
  -8  10   2   58.76    3.21
   7 -10  -2   44.93    2.77
   7 -10  -2   49.68    3.16
  -7  10   2   47.96    2.80
  -7  10   2   46.91    2.56
   6 -10  -2   17.97    2.20
   6 -10  -2   18.98    2.07
  -6  10   2   20.02    2.09
  -6  10   2   22.01    1.96
   5 -10  -2    2.36    1.01
   5 -10  -2    4.65    1.15
  -5  10   2    2.82    0.81
  -5  10   2    2.14    0.86
   4 -10  -2    3.72    1.14
   4 -10  -2    3.78    1.10
  -4  10   2    1.97    0.66
  -4  10   2    3.83    0.98
   3 -10  -2    8.32    1.41
   3 -10  -2    7.48    1.42
  -3  10   2    9.71    1.49
  -3  10   2   12.77    1.36
  -3  10   2   11.13    1.43
  -3  10   2   13.37    2.23
   2 -10  -2   10.98    1.66
   2 -10  -2   10.14    1.57
  -2  10   2   10.20    1.75
  -2  10   2   10.18    1.41
  -2  10   2    9.64    1.31
   1 -10  -2   27.40    2.62
   1 -10  -2   27.88    2.27
  -1  10   2   32.14    2.10
  -1  10   2   32.23    2.81
  -1  10   2   29.70    2.14
   0 -10  -2   53.73    3.17
   0 -10  -2   54.54    3.31
   0  10   2   56.25    2.77
   0  10   2   60.55    3.89
   0  10   2   50.15    3.01
  -1 -10  -2   30.55    2.81
  -1 -10  -2   32.67    2.53
   1  10   2   32.60    2.18
   1  10   2   29.53    3.13
   1  10   2   33.45    2.62
  -2 -10  -2   18.27    2.30
  -2 -10  -2   16.00    2.10
   2  10   2   24.53    2.71
   7 -11  -2    2.33    1.02
   7 -11  -2    2.25    1.22
  -7  11   2    4.09    1.25
   6 -11  -2   15.55    2.20
   6 -11  -2   17.27    2.07
  -6  11   2   19.96    2.19
   5 -11  -2   40.92    2.76
   5 -11  -2   36.41    2.85
  -5  11   2   38.40    2.50
   4 -11  -2   61.50    3.35
   4 -11  -2   62.26    3.58
  -4  11   2   58.51    3.06
  -4  11   2   64.43    3.40
   3 -11  -2   76.58    3.78
   3 -11  -2   68.81    3.73
  -3  11   2   68.54    3.28
   2 -11  -2   61.68    3.42
   2 -11  -2   64.53    3.59
  -2  11   2   58.00    3.00
   1 -11  -2   52.35    3.25
   1 -11  -2   58.89    3.46
  -1  11   2   55.01    3.09
  -1  11   2   54.49    2.88
   0 -11  -2   17.36    2.19
   0 -11  -2   20.06    2.44
   0  11   2   19.60    1.97
   0  11   2   20.44    2.33
  -1 -11  -2    3.51    1.22
  -1 -11  -2    4.26    1.39
   1  11   2    2.48    1.13
   5 -12  -2   11.10    1.75
   5 -12  -2    9.82    1.89
  -5  12   2   11.76    1.71
   4 -12  -2    1.54    1.02
   4 -12  -2    3.07    1.28
  -4  12   2    3.05    1.04
   3 -12  -2    0.23    0.88
   3 -12  -2    2.30    1.16
  -3  12   2    1.75    0.89
   2 -12  -2    1.47    1.05
   2 -12  -2    1.30    1.06
  -2  12   2    1.55    0.94
  -2  13  -3    5.74    1.43
   2 -13   3    3.96    1.36
   2 -13   3    3.31    1.25
  -3  13  -3   20.78    2.40
   3 -13   3   21.31    2.44
   3 -13   3   20.49    2.46
  -4  13  -3   13.56    2.00
   4 -13   3   14.62    2.12
   4 -13   3   14.58    2.21
   4 -13   3   15.30    2.01
   1  12  -3   22.09    2.36
  -1 -12   3   17.86    2.38
   0  12  -3   28.40    2.68
   0 -12   3   30.69    3.03
   0 -12   3   25.69    2.61
  -1  12  -3   45.90    2.77
  -1  12  -3   37.86    2.25
  -1  12  -3   40.17    2.76
  -1  12  -3   42.04    2.51
   1 -12   3   38.81    2.82
   1 -12   3   37.88    2.84
  -2  12  -3   40.74    2.44
  -2  12  -3   36.19    2.25
  -2  12  -3   38.78    2.65
   2 -12   3   43.05    2.94
   2 -12   3   39.58    2.88
  -3  12  -3   16.56    2.06
  -3  12  -3   16.85    1.80
   3 -12   3   21.86    2.43
   3 -12   3   22.52    2.50
  -4  12  -3    9.53    1.48
  -4  12  -3   10.88    1.77
   4 -12   3    8.85    1.40
   4 -12   3   10.96    1.74
   4 -12   3    8.08    1.56
  -5  12  -3   13.79    1.97
   5 -12   3   11.82    1.54
   5 -12   3   12.35    1.82
   5 -12   3   11.11    1.90
  -6  12  -3    2.90    1.13
   6 -12   3    1.42    1.04
   6 -12   3    2.75    1.05
  -7  12  -3    0.13    0.78
   7 -12   3    1.41    0.87
   7 -12   3    0.28    0.99
   2  11  -3   40.41    2.81
  -2 -11   3   45.91    3.27
   1  11  -3   22.47    1.62
   1  11  -3   20.22    2.15
   1  11  -3   21.28    2.01
  -1 -11   3   21.02    2.39
   0  11  -3    4.97    1.17
   0  11  -3    7.80    1.28
   0  11  -3    4.70    0.93
   0 -11   3    8.61    1.59
   0 -11   3    7.94    1.54
  -1  11  -3    1.39    0.59
  -1  11  -3   -0.16    0.59
  -1  11  -3    2.02    0.74
   1 -11   3    1.31    0.93
   1 -11   3    2.11    0.91
  -2  11  -3    0.03    0.60
  -2  11  -3    0.26    0.45
  -2  11  -3    0.92    0.63
   2 -11   3    0.84    0.80
   2 -11   3    0.46    0.75
  -3  11  -3   27.19    1.95
  -3  11  -3   29.51    2.24
   3 -11   3   27.04    2.19
   3 -11   3   25.94    2.50
  -4  11  -3   74.09    3.56
  -4  11  -3   76.68    3.34
   4 -11   3   84.62    3.72
   4 -11   3   70.30    3.15
   4 -11   3   75.96    3.77
  -5  11  -3   41.74    2.52
  -5  11  -3   44.80    2.77
   5 -11   3   46.18    3.01
   5 -11   3   47.79    2.47
   5 -11   3   49.49    2.80
  -6  11  -3   32.63    2.51
   6 -11   3   32.82    2.31
   6 -11   3   35.09    2.05
   6 -11   3   32.73    2.61
  -7  11  -3   30.26    2.77
   7 -11   3   34.45    2.33
   7 -11   3   33.72    2.69
  -8  11  -3   26.74    2.63
   8 -11   3   26.19    2.70
   4  10  -3    1.05    0.98
  -4 -10   3    0.84    1.05
   3  10  -3    3.99    1.21
  -3 -10   3    6.93    1.54
   2  10  -3   13.47    1.60
   2  10  -3   16.58    1.97
   2  10  -3   16.42    1.36
  -2 -10   3   15.58    2.11
   1  10  -3   46.83    2.47
   1  10  -3   44.11    2.24
   1  10  -3   46.43    2.72
  -1 -10   3   47.51    2.99
  -1 -10   3   41.64    2.77
   0  10  -3   83.82    3.25
   0  10  -3   75.22    3.50
   0  10  -3   87.35    3.39
   0 -10   3   77.39    3.72
   0 -10   3   91.43    4.02
  -1  10  -3   43.46    2.31
  -1  10  -3   37.16    2.08
  -1  10  -3   42.11    2.49
   1 -10   3   34.81    2.37
   1 -10   3   43.64    2.69
  -2  10  -3   21.99    1.60
  -2  10  -3   23.31    1.70
  -2  10  -3   23.91    1.91
   2 -10   3   24.15    2.31
   2 -10   3   22.00    2.11
   2 -10   3   21.78    2.19
  -3  10  -3   48.15    2.64
  -3  10  -3   48.54    2.43
  -3  10  -3   51.21    2.51
   3 -10   3   53.31    3.04
   3 -10   3   47.29    2.65
   3 -10   3   46.88    2.80
  -4  10  -3   31.27    1.99
  -4  10  -3   31.55    2.19
   4 -10   3   32.86    2.17
   4 -10   3   32.95    1.99
   4 -10   3   32.17    2.34
  -5  10  -3   22.68    2.16
  -5  10  -3   20.01    1.92
   5 -10   3   22.37    1.60
   5 -10   3   22.05    2.04
   5 -10   3   22.97    2.28
  -6  10  -3    1.20    0.81
  -6  10  -3    0.90    0.69
   6 -10   3    2.59    0.82
   6 -10   3    1.96    0.64
   6 -10   3    0.94    0.80
  -7  10  -3    0.89    0.70
   7 -10   3    1.60    0.60
   7 -10   3    1.55    0.70
   7 -10   3    1.22    0.54
   7 -10   3    1.39    0.91
  -8  10  -3    1.56    0.86
   8 -10   3    0.34    0.84
   5   9  -3   54.65    3.31
  -5  -9   3   59.10    3.69
   4   9  -3   90.94    4.14
  -4  -9   3   95.89    4.58
   3   9  -3   96.55    3.47
   3   9  -3  103.36    4.24
   3   9  -3  104.75    3.83
  -3  -9   3   93.20    4.39
   2   9  -3  116.82    4.12
   2   9  -3  120.47    4.54
   2   9  -3  122.15    4.02
  -2  -9   3  117.86    4.79
   1   9  -3   49.53    2.33
   1   9  -3   52.67    2.80
   1   9  -3   51.52    2.49
  -1  -9   3   53.85    2.98
  -1  -9   3   45.05    2.72
   0   9  -3   21.55    2.01
   0   9  -3   23.58    1.65
   0   9  -3   23.09    1.56
   0  -9   3   22.97    2.16
   0  -9   3   24.24    1.93
   0  -9   3   26.26    2.11
  -1   9  -3    3.14    0.81
  -1   9  -3    3.15    0.85
  -1   9  -3    2.10    0.60
   1  -9   3    0.85    0.65
   1  -9   3    2.81    0.91
   1  -9   3    2.00    0.77
  -2   9  -3   25.43    1.65
  -2   9  -3   28.58    1.92
  -2   9  -3   30.60    1.81
   2  -9   3   26.39    2.03
   2  -9   3   27.72    1.65
   2  -9   3   31.19    2.18
   2  -9   3   32.61    2.20
   2  -9   3   30.96    2.05
  -3   9  -3   30.35    1.79
  -3   9  -3   29.39    2.17
  -3   9  -3   29.80    1.80
  -3   9  -3   28.61    1.93
   3  -9   3   29.66    2.11
   3  -9   3   26.10    2.05
   3  -9   3   26.65    1.88
   3  -9   3   28.58    1.65
   3  -9   3   31.42    2.15
  -4   9  -3   38.98    2.11
  -4   9  -3   44.04    2.37
  -4   9  -3   37.41    2.08
  -4   9  -3   37.20    2.62
   4  -9   3   39.61    1.94
   4  -9   3   40.45    1.92
   4  -9   3   38.92    2.44
   4  -9   3   38.72    2.05
   4  -9   3   39.11    2.43
   4  -9   3   41.52    2.47
   4  -9   3   43.35    2.28
  -5   9  -3   49.81    2.62
  -5   9  -3   50.79    2.49
   5  -9   3   56.08    3.00
   5  -9   3   51.34    2.79
   5  -9   3   52.68    2.80
   5  -9   3   54.56    2.39
   5  -9   3   54.24    2.23
   5  -9   3   56.22    2.59
  -6   9  -3   60.75    2.79
  -6   9  -3   67.74    3.05
   6  -9   3   55.47    2.40
   6  -9   3   62.05    3.08
   6  -9   3   63.09    2.90
   6  -9   3   58.63    2.31
   6  -9   3   62.35    3.27
   6  -9   3   57.45    2.64
  -7   9  -3   43.06    2.54
  -7   9  -3   44.87    2.42
   7  -9   3   42.13    2.23
   7  -9   3   41.01    2.57
   7  -9   3   43.50    1.90
   7  -9   3   42.29    1.80
  -8   9  -3   24.75    2.36
   8  -9   3   19.34    2.07
  -9   9  -3   12.87    1.83
   9  -9   3   11.87    1.75
   5   8  -3   23.57    2.37
  -5  -8   3   20.60    2.33
   4   8  -3   17.62    1.97
   4   8  -3   15.11    1.67
   4   8  -3   16.79    1.32
  -4  -8   3   19.98    2.26
   3   8  -3    2.53    0.72
   3   8  -3    1.94    0.68
   3   8  -3    1.64    0.82
  -3  -8   3    3.67    1.07
   2   8  -3   15.71    1.92
   2   8  -3   16.88    1.64
   2   8  -3   16.42    1.31
   2   8  -3   16.40    1.81
  -2  -8   3   18.37    2.04
   1   8  -3   23.87    2.09
   1   8  -3   22.13    2.03
   1   8  -3   24.12    1.62
   1   8  -3   23.25    1.52
  -1  -8   3   21.26    2.04
  -1  -8   3   23.97    1.91
  -1  -8   3   25.01    2.15
   0   8  -3   40.14    2.64
   0   8  -3   41.27    2.52
   0   8  -3   46.81    2.12
   0   8  -3   42.52    2.11
   0   8  -3   42.33    2.32
   0   8  -3   38.86    2.56
   0   8  -3   42.32    2.68
   0  -8   3   43.28    2.51
   0  -8   3   40.22    2.00
   0  -8   3   43.20    2.85
   0  -8   3   42.23    2.35
   0  -8   3   43.40    2.46
   0  -8   3   41.67    2.42
   0  -8   3   42.26    2.67
  -1   8  -3  156.75    5.41
  -1   8  -3  156.49    4.73
  -1   8  -3  162.26    5.75
  -1   8  -3  164.93    5.73
  -1   8  -3  161.19    4.66
  -1   8  -3  168.30    4.99
  -1   8  -3  156.63    5.65
   1  -8   3  167.10    5.76
   1  -8   3  155.86    5.31
   1  -8   3  174.35    5.29
   1  -8   3  159.13    4.98
   1  -8   3  163.78    6.02
   1  -8   3  151.76    4.60
   1  -8   3  156.49    5.60
   1  -8   3  160.65    5.28
   1  -8   3  169.33    5.67
  -2   8  -3  160.72    5.69
  -2   8  -3  164.65    4.73
  -2   8  -3  161.49    5.49
  -2   8  -3  172.23    4.93
  -2   8  -3  157.08    5.60
  -2   8  -3  171.65    5.05
   2  -8   3  160.27    5.15
   2  -8   3  167.25    5.75
   2  -8   3  163.38    5.59
   2  -8   3  169.01    5.79
   2  -8   3  167.67    6.09
   2  -8   3  168.53    5.45
   2  -8   3  170.06    4.73
   2  -8   3  166.35    5.33
   2  -8   3  172.19    5.77
   2  -8   3  164.83    4.99
  -3   8  -3  165.59    4.76
  -3   8  -3  148.96    5.18
  -3   8  -3  155.36    4.74
  -3   8  -3  162.24    5.87
  -3   8  -3  153.61    5.39
  -3   8  -3  149.29    4.47
   3  -8   3  154.51    4.41
   3  -8   3  156.70    5.21
   3  -8   3  153.38    5.06
   3  -8   3  152.92    5.40
   3  -8   3  154.04    4.74
   3  -8   3  166.34    5.45
   3  -8   3  151.85    4.93
   3  -8   3  150.13    4.66
   3  -8   3  159.46    5.83
   3  -8   3  161.36    4.76
  -4   8  -3   54.31    2.49
  -4   8  -3   51.21    2.29
  -4   8  -3   49.74    2.66
   4  -8   3   51.44    2.56
   4  -8   3   54.95    2.13
   4  -8   3   56.24    2.43
   4  -8   3   51.51    2.78
   4  -8   3   53.26    3.03
   4  -8   3   51.09    2.73
   4  -8   3   49.64    2.56
   4  -8   3   48.72    2.02
   4  -8   3   50.37    2.61
   4  -8   3   52.55    2.28
  -5   8  -3   32.25    1.84
  -5   8  -3   32.57    1.95
   5  -8   3   33.28    2.07
   5  -8   3   29.74    1.77
   5  -8   3   32.59    2.02
   5  -8   3   31.74    2.23
   5  -8   3   29.56    1.64
   5  -8   3   34.21    1.60
   5  -8   3   31.50    2.12
   5  -8   3   35.02    2.28
   5  -8   3   33.98    2.40
  -6   8  -3   17.36    1.59
  -6   8  -3   18.88    1.96
  -6   8  -3   17.67    1.70
   6  -8   3   19.57    1.88
   6  -8   3   15.92    1.27
   6  -8   3   16.56    1.77
   6  -8   3   17.96    1.12
   6  -8   3   16.34    1.69
   6  -8   3   15.88    1.53
   6  -8   3   15.93    1.15
   6  -8   3   18.59    2.13
  -7   8  -3    0.45    0.49
  -7   8  -3    0.45    0.62
   7  -8   3    0.08    0.60
   7  -8   3    0.98    0.39
   7  -8   3    0.34    0.55
   7  -8   3   -0.24    0.48
   7  -8   3    0.24    0.46
   7  -8   3    0.48    0.34
  -8   8  -3    6.92    1.13
  -8   8  -3    9.90    1.47
   8  -8   3    8.21    1.50
   8  -8   3    5.79    1.18
  -9   8  -3   15.79    1.84
   9  -8   3   11.86    1.69
   9  -8   3   13.19    1.72
   6   7  -3   18.32    2.09
  -6  -7   3   17.65    2.21
   5   7  -3   35.26    2.14
   5   7  -3   32.50    1.77
   5   7  -3   34.05    2.35
  -5  -7   3   34.55    2.44
   4   7  -3  109.42    4.13
   4   7  -3  102.91    3.73
   4   7  -3  104.45    3.58
  -4  -7   3  102.91    4.12
   3   7  -3  142.86    4.42
   3   7  -3  139.91    4.71
   3   7  -3  138.25    4.32
   3   7  -3  140.01    5.25
  -3  -7   3  138.43    4.82
   2   7  -3  192.31    5.27
   2   7  -3  173.44    6.21
   2   7  -3  182.37    5.44
   2   7  -3  180.66    6.21
   2   7  -3  179.46    5.14
   2   7  -3  180.73    6.10
  -2  -7   3  182.37    5.62
  -2  -7   3  185.95    6.22
  -2  -7   3  179.74    5.97
   1   7  -3  120.92    4.56
   1   7  -3  115.24    4.56
   1   7  -3  123.44    3.80
   1   7  -3  118.30    4.43
   1   7  -3  115.28    4.58
   1   7  -3  115.51    3.71
   1   7  -3  118.43    4.00
  -1  -7   3  119.25    4.59
  -1  -7   3  121.78    4.38
  -1  -7   3  116.85    4.53
  -1  -7   3  117.11    4.50
  -1  -7   3  115.84    4.07
  -1  -7   3  113.21    4.12
  -1  -7   3  116.17    4.57
   0   7  -3   77.26    3.51
   0   7  -3   81.26    2.86
   0   7  -3   80.70    3.61
   0   7  -3   80.13    3.05
   0   7  -3   79.37    3.47
   0   7  -3   81.53    2.87
   0   7  -3   75.12    3.47
   0   7  -3   80.57    3.56
   0  -7   3   81.35    3.24
   0  -7   3   78.74    3.28
   0  -7   3   83.11    3.15
   0  -7   3   76.42    2.77
   0  -7   3   78.77    3.72
   0  -7   3   76.52    3.40
   0  -7   3   77.10    3.49
   0  -7   3   78.79    3.47
  -1   7  -3   13.95    1.54
  -1   7  -3   17.38    1.48
  -1   7  -3   17.74    1.20
  -1   7  -3   19.59    1.66
  -1   7  -3   19.22    1.28
  -1   7  -3   17.54    1.55
  -1   7  -3   17.01    1.33
  -1   7  -3   17.69    1.57
  -1   7  -3   17.38    1.83
   1  -7   3   18.64    1.50
   1  -7   3   19.66    1.54
   1  -7   3   13.18    1.33
   1  -7   3   18.07    1.48
   1  -7   3   17.82    1.58
   1  -7   3   19.14    1.96
   1  -7   3   18.76    1.93
   1  -7   3   17.21    1.48
   1  -7   3   17.59    1.15
   1  -7   3   18.76    2.11
  -2   7  -3    0.06    0.42
  -2   7  -3    0.12    0.29
  -2   7  -3    0.11    0.29
  -2   7  -3    0.70    0.48
  -2   7  -3    0.40    0.43
  -2   7  -3    1.02    0.54
  -2   7  -3    0.24    0.33
  -2   7  -3    0.57    0.46
   2  -7   3    0.11    0.38
   2  -7   3    0.08    0.37
   2  -7   3   -0.09    0.42
   2  -7   3    0.16    0.39
   2  -7   3    0.12    0.38
   2  -7   3   -0.05    0.36
   2  -7   3    0.21    0.39
   2  -7   3    0.43    0.32
   2  -7   3    0.65    0.49
   2  -7   3    0.92    0.53
  -3   7  -3   23.33    1.80
  -3   7  -3   20.70    1.62
  -3   7  -3   22.85    1.62
  -3   7  -3   22.38    1.37
  -3   7  -3   20.72    1.63
  -3   7  -3   21.58    1.66
  -3   7  -3   21.42    1.44
  -3   7  -3   21.66    1.35
  -3   7  -3   24.88    1.68
   3  -7   3   20.44    1.32
   3  -7   3   21.34    1.64
   3  -7   3   24.43    1.87
   3  -7   3   22.66    1.56
   3  -7   3   21.57    1.58
   3  -7   3   24.58    1.47
   3  -7   3   20.94    1.55
   3  -7   3   22.77    1.25
   3  -7   3   24.85    1.76
   3  -7   3   23.45    1.38
  -4   7  -3   96.83    3.75
  -4   7  -3   99.29    3.80
  -4   7  -3  105.33    3.44
  -4   7  -3   95.82    3.69
  -4   7  -3   94.86    3.93
  -4   7  -3   94.66    3.65
  -4   7  -3  100.00    3.23
  -4   7  -3  101.88    3.36
   4  -7   3  105.24    3.85
   4  -7   3   97.43    3.51
   4  -7   3   98.78    3.22
   4  -7   3  101.58    3.03
   4  -7   3   98.21    4.03
   4  -7   3  101.58    3.87
   4  -7   3  103.12    3.51
   4  -7   3   96.79    3.15
   4  -7   3  101.93    3.71
  -5   7  -3  117.40    4.12
  -5   7  -3  110.98    3.54
  -5   7  -3  110.54    3.67
  -5   7  -3  108.93    3.68
   5  -7   3  112.23    4.13
   5  -7   3  106.71    3.19
   5  -7   3  108.71    2.92
   5  -7   3  111.98    3.72
   5  -7   3  107.74    3.99
   5  -7   3  116.75    4.44
   5  -7   3  112.34    3.43
   5  -7   3  109.34    3.63
   5  -7   3  115.10    4.24
   5  -7   3  106.18    3.30
   5  -7   3  106.66    3.74
  -6   7  -3  112.29    4.19
  -6   7  -3  112.63    3.79
  -6   7  -3  105.83    3.60
   6  -7   3  112.78    3.16
   6  -7   3  112.53    3.87
   6  -7   3  110.01    4.24
   6  -7   3  111.39    4.18
   6  -7   3  107.38    3.22
   6  -7   3  112.56    3.47
   6  -7   3  113.38    3.41
   6  -7   3  114.25    3.84
   6  -7   3  117.81    4.37
   6  -7   3  114.57    4.47
  -7   7  -3   76.47    3.02
  -7   7  -3   79.90    3.16
  -7   7  -3   78.16    3.50
   7  -7   3   80.10    3.19
   7  -7   3   73.44    3.52
   7  -7   3   77.81    3.18
   7  -7   3   79.44    3.53
   7  -7   3   76.65    2.87
   7  -7   3   81.02    3.75
   7  -7   3   75.64    2.62
  -8   7  -3   29.04    2.02
  -8   7  -3   28.02    1.90
   8  -7   3   31.87    2.06
   8  -7   3   31.38    2.33
  -9   7  -3    9.04    1.41
   9  -7   3    9.62    1.43
   9  -7   3    9.62    1.44
 -10   7  -3   10.25    1.65
   7   6  -3   25.85    2.51
   7   6  -3   25.43    2.54
  -7  -6   3   18.69    2.12
   6   6  -3   30.97    2.23
   6   6  -3   27.42    1.60
  -6  -6   3   22.98    2.19
   5   6  -3   46.89    2.41
   5   6  -3   49.87    2.68
   5   6  -3   47.75    2.21
  -5  -6   3   51.28    2.71
   4   6  -3   28.15    2.14
   4   6  -3   29.43    1.81
   4   6  -3   27.48    1.90
   4   6  -3   30.27    1.70
  -4  -6   3   30.03    1.98
  -4  -6   3   32.08    2.35
   3   6  -3    7.48    1.03
   3   6  -3    8.16    1.40
   3   6  -3    9.75    1.50
   3   6  -3    9.32    1.19
   3   6  -3    8.69    1.28
   3   6  -3    7.04    1.13
  -3  -6   3    6.44    1.01
  -3  -6   3    7.00    1.15
  -3  -6   3    6.49    0.96
   2   6  -3    1.68    0.66
   2   6  -3    0.29    0.33
   2   6  -3    1.67    0.61
   2   6  -3    1.92    0.52
   2   6  -3    1.68    0.65
   2   6  -3    2.01    0.62
   2   6  -3    1.40    0.64
   2   6  -3    0.27    0.37
  -2  -6   3    1.31    0.46
  -2  -6   3    2.10    0.75
  -2  -6   3    0.84    0.62
  -2  -6   3    1.30    0.56
  -2  -6   3    1.42    0.63
  -2  -6   3    1.04    0.59
  -2  -6   3    2.04    0.74
   1   6  -3   16.04    1.12
   1   6  -3   15.82    1.43
   1   6  -3   14.93    1.39
   1   6  -3   14.71    1.38
   1   6  -3   17.34    1.73
   1   6  -3   16.57    1.41
   1   6  -3   17.40    1.19
   1   6  -3   17.74    1.81
   1   6  -3   13.18    1.46
  -1  -6   3   14.17    1.54
  -1  -6   3   16.39    1.40
  -1  -6   3   14.89    1.45
  -1  -6   3   15.79    1.70
  -1  -6   3   17.24    1.43
  -1  -6   3   11.87    1.28
  -1  -6   3   15.99    1.42
  -1  -6   3   18.80    1.56
   0   6  -3   38.75    2.24
   0   6  -3   39.35    2.12
   0   6  -3   41.70    1.82
   0   6  -3   40.16    1.93
   0   6  -3   41.31    2.26
   0   6  -3   39.32    2.23
   0   6  -3   37.45    2.19
   0   6  -3   44.10    1.85
   0  -6   3   41.77    2.00
   0  -6   3   42.51    2.30
   0  -6   3   35.47    2.11
   0  -6   3   42.45    1.77
   0  -6   3   41.72    2.45
   0  -6   3   42.21    2.27
   0  -6   3   40.08    2.19
   0  -6   3   41.53    2.12
   0  -6   3   42.08    2.09
  -1   6  -3  125.75    4.16
  -1   6  -3  124.43    4.32
  -1   6  -3  122.25    4.25
  -1   6  -3  122.84    3.62
  -1   6  -3  128.26    4.17
  -1   6  -3  124.64    4.36
  -1   6  -3  121.16    3.50
  -1   6  -3  118.84    4.22
  -1   6  -3  121.31    3.70
   1  -6   3  123.15    4.00
   1  -6   3  118.91    3.84
   1  -6   3  121.46    3.47
   1  -6   3  117.08    4.22
   1  -6   3  122.08    4.26
   1  -6   3  118.29    4.16
   1  -6   3  118.02    3.69
   1  -6   3  119.72    4.00
   1  -6   3  125.71    4.20
   1  -6   3  120.96    4.51
  -2   6  -3  161.38    4.92
  -2   6  -3  157.88    4.43
  -2   6  -3  158.54    5.06
  -2   6  -3  164.60    4.46
  -2   6  -3  169.06    5.10
  -2   6  -3  162.02    4.26
  -2   6  -3  169.37    5.44
  -2   6  -3  162.59    4.93
  -2   6  -3  151.50    4.95
   2  -6   3  163.84    4.26
   2  -6   3  153.30    4.65
   2  -6   3  168.93    5.07
   2  -6   3  166.82    4.45
   2  -6   3  167.19    5.03
   2  -6   3  169.90    5.44
   2  -6   3  157.21    4.55
   2  -6   3  157.58    5.04
   2  -6   3  159.36    4.87
   2  -6   3  163.93    5.09
  -3   6  -3  221.06    5.83
  -3   6  -3  220.95    6.22
  -3   6  -3  222.73    5.37
  -3   6  -3  218.20    6.13
  -3   6  -3  216.99    5.65
  -3   6  -3  223.16    6.54
  -3   6  -3  211.09    6.05
  -3   6  -3  221.51    5.53
  -3   6  -3  210.51    6.11
   3  -6   3  219.58    5.36
   3  -6   3  223.43    5.46
   3  -6   3  227.75    6.16
   3  -6   3  213.75    5.59
   3  -6   3  209.59    5.48
   3  -6   3  224.85    6.20
   3  -6   3  229.16    6.61
   3  -6   3  224.60    5.83
   3  -6   3  215.98    5.60
   3  -6   3  216.54    6.30
  -4   6  -3  187.18    5.57
  -4   6  -3  201.43    5.69
  -4   6  -3  184.76    4.89
  -4   6  -3  195.25    5.60
  -4   6  -3  209.39    6.04
  -4   6  -3  193.37    5.19
  -4   6  -3  197.99    5.59
  -4   6  -3  191.26    5.24
  -4   6  -3  190.37    5.06
   4  -6   3  204.95    5.70
   4  -6   3  193.40    5.80
   4  -6   3  198.88    4.84
   4  -6   3  196.21    5.10
   4  -6   3  199.56    5.27
   4  -6   3  191.03    5.93
   4  -6   3  187.65    5.56
   4  -6   3  193.16    4.86
   4  -6   3  177.47    4.83
   4  -6   3  200.74    5.70
  -5   6  -3  135.97    4.51
  -5   6  -3  139.36    4.53
  -5   6  -3  141.44    4.23
  -5   6  -3  145.97    4.88
  -5   6  -3  146.37    4.06
  -5   6  -3  136.46    4.09
  -5   6  -3  135.86    4.62
   5  -6   3  144.65    4.12
   5  -6   3  143.25    4.72
   5  -6   3  148.00    3.32
   5  -6   3  136.36    3.72
   5  -6   3  137.97    3.78
   5  -6   3  138.82    4.59
   5  -6   3  149.40    4.27
   5  -6   3  140.38    4.59
   5  -6   3  148.16    4.04
   5  -6   3  143.38    3.70
   5  -6   3  153.29    4.94
   5  -6   3  138.38    4.55
  -6   6  -3   35.43    2.05
  -6   6  -3   34.81    1.86
  -6   6  -3   33.19    1.75
   6  -6   3   35.20    1.13
   6  -6   3   34.86    1.83
   6  -6   3   37.57    2.13
   6  -6   3   35.14    1.54
   6  -6   3   36.43    2.13
   6  -6   3   35.34    1.86
   6  -6   3   31.73    1.30
   6  -6   3   39.29    2.29
   6  -6   3   34.37    1.66
   6  -6   3   36.31    1.57
  -7   6  -3    4.85    1.00
  -7   6  -3    2.90    0.76
  -7   6  -3    4.59    0.83
   7  -6   3    3.31    0.80
   7  -6   3    3.30    0.84
   7  -6   3    3.44    0.81
   7  -6   3    4.61    0.76
   7  -6   3    3.51    0.93
   7  -6   3    4.76    1.12
   7  -6   3    4.74    0.67
  -8   6  -3    2.18    0.86
  -8   6  -3    0.31    0.53
  -8   6  -3    1.62    0.65
   8  -6   3    2.31    0.77
   8  -6   3    0.91    0.69
   8  -6   3    1.32    0.66
   8  -6   3    1.41    0.77
  -9   6  -3   16.97    1.80
   9  -6   3   17.51    2.05
   9  -6   3   19.66    1.90
 -10   6  -3   26.46    2.14
   8   5  -3    0.36    0.78
   8   5  -3    0.43    0.76
  -8  -5   3   -0.38    0.70
   7   5  -3    0.22    0.69
   7   5  -3    0.23    0.47
   7   5  -3   -0.22    0.64
  -7  -5   3   -0.06    0.61
   6   5  -3   20.53    1.42
   6   5  -3   18.98    1.92
   6   5  -3   20.64    1.63
  -6  -5   3   18.34    1.94
   5   5  -3   55.66    2.67
   5   5  -3   53.12    2.44
   5   5  -3   50.00    2.26
   5   5  -3   55.78    2.93
  -5  -5   3   51.43    2.58
   4   5  -3  111.78    4.30
   4   5  -3  111.09    3.68
   4   5  -3  116.99    4.57
   4   5  -3  114.47    3.71
   4   5  -3  113.62    3.90
   4   5  -3  117.49    4.29
  -4  -5   3  117.56    3.96
  -4  -5   3  118.34    3.90
  -4  -5   3  116.32    4.29
   3   5  -3  124.13    4.36
   3   5  -3  112.02    4.11
   3   5  -3  117.12    4.26
   3   5  -3  119.89    4.27
   3   5  -3  126.33    3.81
   3   5  -3  124.97    3.91
   3   5  -3  122.03    3.71
  -3  -5   3  120.95    4.27
  -3  -5   3  124.06    4.34
  -3  -5   3  125.62    3.90
  -3  -5   3  122.63    4.42
  -3  -5   3  119.21    3.82
  -3  -5   3  120.98    4.25
  -3  -5   3  119.88    4.50
   2   5  -3  185.13    4.85
   2   5  -3  185.40    5.56
   2   5  -3  187.30    5.64
   2   5  -3  181.45    5.02
   2   5  -3  188.47    5.66
   2   5  -3  188.82    5.06
   2   5  -3  193.38    5.61
   2   5  -3  187.90    5.85
   2   5  -3  187.49    5.62
  -2  -5   3  194.03    5.73
  -2  -5   3  181.85    5.04
  -2  -5   3  190.64    5.08
  -2  -5   3  195.07    5.64
  -2  -5   3  178.87    5.54
  -2  -5   3  187.47    5.85
  -2  -5   3  185.02    5.56
   1   5  -3  112.55    3.45
   1   5  -3  117.09    3.91
   1   5  -3  113.43    3.88
   1   5  -3  116.22    3.42
   1   5  -3  118.92    3.91
   1   5  -3  112.58    4.01
   1   5  -3  113.15    3.95
   1   5  -3  112.35    3.88
  -1  -5   3  112.28    3.80
  -1  -5   3  108.59    3.84
  -1  -5   3  118.51    3.95
  -1  -5   3  109.89    3.20
  -1  -5   3  110.50    3.54
  -1  -5   3  116.57    3.95
   0   5  -3   90.86    3.41
   0   5  -3   95.62    2.83
   0   5  -3  100.66    3.45
   0   5  -3   92.88    2.88
   0   5  -3   90.51    2.94
   0   5  -3   93.30    3.46
   0   5  -3   92.43    3.30
   0   5  -3   95.24    3.46
   0   5  -3   89.55    3.38
   0  -5   3   95.95    3.42
   0  -5   3   92.01    2.78
   0  -5   3   95.09    2.74
   0  -5   3   95.49    3.67
   0  -5   3   94.53    3.02
   0  -5   3   94.26    3.27
   0  -5   3   94.87    3.39
   0  -5   3   91.85    3.11
   0  -5   3   92.68    3.38
   0  -5   3   96.34    3.46
  -1   5  -3   62.99    2.14
  -1   5  -3   64.47    2.60
  -1   5  -3   64.38    2.13
  -1   5  -3   65.35    2.69
  -1   5  -3   66.08    2.54
  -1   5  -3   61.23    2.46
  -1   5  -3   63.88    2.62
  -1   5  -3   66.69    2.30
  -1   5  -3   61.75    2.56
   1  -5   3   58.46    2.30
   1  -5   3   58.23    2.02
   1  -5   3   58.96    2.36
   1  -5   3   63.96    2.68
   1  -5   3   61.18    2.38
   1  -5   3   54.01    2.44
   1  -5   3   59.18    2.69
   1  -5   3   63.88    2.54
   1  -5   3   52.70    2.43
   1  -5   3   64.63    2.03
   1  -5   3   62.52    2.25
   1  -5   3   60.65    2.40
   1  -5   3   64.42    2.56
  -2   5  -3    0.77    0.36
  -2   5  -3    0.61    0.34
  -2   5  -3    0.69    0.34
  -2   5  -3    1.05    0.35
  -2   5  -3    1.24    0.40
  -2   5  -3    1.43    0.49
  -2   5  -3    0.81    0.33
  -2   5  -3    0.93    0.41
  -2   5  -3    1.16    0.41
  -2   5  -3    1.27    0.42
   2  -5   3    1.38    0.47
   2  -5   3    1.01    0.45
   2  -5   3    1.35    0.43
   2  -5   3    1.47    0.46
   2  -5   3    1.42    0.46
   2  -5   3    1.10    0.36
   2  -5   3    2.23    0.59
   2  -5   3    0.97    0.40
   2  -5   3    0.61    0.35
   2  -5   3    2.00    0.54
   2  -5   3    1.74    0.40
   2  -5   3    1.08    0.32
   2  -5   3    0.91    0.32
  -3   5  -3    3.89    0.64
  -3   5  -3    4.32    0.74
  -3   5  -3    2.76    0.55
  -3   5  -3    3.68    0.63
  -3   5  -3    4.46    0.81
  -3   5  -3    2.61    0.58
  -3   5  -3    2.63    0.47
  -3   5  -3    1.84    0.48
  -3   5  -3    2.73    0.49
   3  -5   3    2.89    0.58
   3  -5   3    3.76    0.70
   3  -5   3    2.75    0.51
   3  -5   3    3.25    0.46
   3  -5   3    2.57    0.58
   3  -5   3    3.23    0.64
   3  -5   3    3.27    0.59
   3  -5   3    3.04    0.45
   3  -5   3    3.23    0.59
   3  -5   3    2.87    0.61
   3  -5   3    3.34    0.49
   3  -5   3    2.48    0.43
   3  -5   3    2.48    0.55
  -4   5  -3   34.76    1.53
  -4   5  -3   36.90    1.90
  -4   5  -3   39.56    1.64
  -4   5  -3   36.78    1.38
  -4   5  -3   38.80    1.71
  -4   5  -3   37.95    1.81
  -4   5  -3   35.30    1.61
  -4   5  -3   35.47    1.68
  -4   5  -3   38.59    1.82
   4  -5   3   36.03    1.81
   4  -5   3   35.74    1.43
   4  -5   3   37.15    1.81
   4  -5   3   38.28    1.66
   4  -5   3   36.39    1.81
   4  -5   3   37.88    1.10
   4  -5   3   34.31    1.76
   4  -5   3   39.62    1.50
   4  -5   3   36.35    1.60
   4  -5   3   35.92    1.34
   4  -5   3   37.56    1.62
   4  -5   3   37.45    1.33
   4  -5   3   37.02    1.91
   4  -5   3   35.03    1.82
  -5   5  -3   74.45    2.91
  -5   5  -3   78.09    2.22
  -5   5  -3   82.28    2.77
  -5   5  -3   78.26    2.65
  -5   5  -3   79.32    2.60
  -5   5  -3   75.90    3.08
  -5   5  -3   78.92    2.78
  -5   5  -3   81.35    2.84
  -5   5  -3   78.89    2.96
   5  -5   3   78.04    2.45
   5  -5   3   80.24    3.00
   5  -5   3   77.36    2.95
   5  -5   3   75.85    2.17
   5  -5   3   81.35    2.65
   5  -5   3   78.64    2.96
   5  -5   3   81.50    2.18
   5  -5   3   78.78    3.10
   5  -5   3   84.69    2.74
   5  -5   3   80.02    2.46
   5  -5   3   79.82    2.33
   5  -5   3   80.88    1.91
   5  -5   3   81.31    3.03
  -6   5  -3   56.35    2.21
  -6   5  -3   56.10    2.52
  -6   5  -3   52.14    2.23
  -6   5  -3   52.25    2.25
   6  -5   3   57.69    2.67
   6  -5   3   55.93    1.91
   6  -5   3   55.95    2.27
   6  -5   3   56.82    2.05
   6  -5   3   53.38    2.53
   6  -5   3   55.40    1.49
   6  -5   3   53.72    2.20
   6  -5   3   57.26    2.57
   6  -5   3   54.15    1.77
   6  -5   3   56.12    2.58
  -7   5  -3   59.44    2.54
  -7   5  -3   58.51    2.41
  -7   5  -3   54.79    2.70
   7  -5   3   62.48    2.89
   7  -5   3   57.85    2.76
   7  -5   3   56.65    2.17
   7  -5   3   55.28    2.81
   7  -5   3   57.86    2.42
   7  -5   3   55.77    2.38
  -8   5  -3   96.34    3.93
  -8   5  -3   94.08    3.39
  -8   5  -3   98.74    3.61
   8  -5   3   95.57    3.99
   8  -5   3   94.37    3.44
   8  -5   3   91.50    3.88
   8  -5   3   93.90    4.07
  -9   5  -3   41.15    2.38
   9  -5   3   40.19    2.72
   9  -5   3   40.99    2.29
   9  -5   3   35.71    2.51
 -10   5  -3   26.61    2.14
   8   4  -3   24.47    2.26
   8   4  -3   22.12    2.25
  -8  -4   3   24.07    2.29
   7   4  -3   43.99    2.40
   7   4  -3   44.63    2.47
   7   4  -3   46.33    2.68
   7   4  -3   42.37    2.08
  -7  -4   3   47.29    2.63
   6   4  -3   56.97    2.79
   6   4  -3   58.42    3.02
   6   4  -3   61.60    2.66
   6   4  -3   52.30    2.36
  -6  -4   3   57.81    2.72
   5   4  -3   19.39    1.78
   5   4  -3   17.63    1.59
   5   4  -3   22.81    1.66
   5   4  -3   19.85    1.43
   5   4  -3   21.09    1.40
   5   4  -3   21.10    1.73
  -5  -4   3   22.37    1.71
  -5  -4   3   21.30    0.87
  -5  -4   3   20.46    1.53
   4   4  -3   34.36    2.04
   4   4  -3   36.87    1.92
   4   4  -3   34.91    2.16
   4   4  -3   35.21    1.76
   4   4  -3   36.72    2.03
   4   4  -3   36.57    2.11
   4   4  -3   34.08    1.71
   4   4  -3   36.82    2.09
  -4  -4   3   38.47    2.16
  -4  -4   3   34.96    1.00
  -4  -4   3   37.16    2.15
  -4  -4   3   32.86    1.78
  -4  -4   3   35.42    1.83
  -4  -4   3   32.90    2.04
  -4  -4   3   34.69    2.00
   3   4  -3   40.86    1.79
   3   4  -3   41.70    1.91
   3   4  -3   44.63    2.09
   3   4  -3   39.65    1.78
   3   4  -3   42.60    2.14
   3   4  -3   42.54    2.22
   3   4  -3   38.80    2.01
  -3  -4   3   41.71    2.08
  -3  -4   3   35.68    1.97
  -3  -4   3   43.32    2.16
  -3  -4   3   39.25    1.80
  -3  -4   3   40.43    2.16
  -3  -4   3   40.17    2.11
  -3  -4   3   38.38    1.82
  -3  -4   3   41.71    2.03
   2   4  -3   22.71    1.39
   2   4  -3   23.64    1.43
   2   4  -3   21.37    1.19
   2   4  -3   20.20    1.36
   2   4  -3   22.33    1.37
   2   4  -3   22.53    1.47
   2   4  -3   20.98    1.17
   2   4  -3   22.50    1.44
  -2  -4   3   21.54    1.26
  -2  -4   3   19.93    1.40
  -2  -4   3   21.10    1.43
  -2  -4   3   20.30    1.36
  -2  -4   3   21.69    1.16
  -2  -4   3   20.16    1.33
  -2  -4   3   22.03    1.20
  -2  -4   3   20.81    1.35
   1   4  -3   -0.01    0.26
   1   4  -3    0.45    0.31
   1   4  -3    0.86    0.39
   1   4  -3    0.43    0.26
   1   4  -3    0.37    0.35
   1   4  -3    0.21    0.31
   1   4  -3    0.27    0.26
   1   4  -3    1.00    0.35
   1   4  -3    0.80    0.17
  -1  -4   3    0.05    0.26
  -1  -4   3    0.13    0.27
  -1  -4   3    0.42    0.23
  -1  -4   3    0.72    0.37
  -1  -4   3    0.17    0.26
  -1  -4   3    0.42    0.35
  -1  -4   3    0.91    0.33
   0   4  -3   29.80    1.58
   0   4  -3   29.20    1.60
   0   4  -3   34.86    1.66
   0   4  -3   31.73    1.66
   0   4  -3   30.29    1.61
   0   4  -3   30.18    1.38
   0   4  -3   31.02    1.30
   0   4  -3   31.55    1.56
   0  -4   3   33.96    1.40
   0  -4   3   32.14    1.64
   0  -4   3   32.30    1.46
   0  -4   3   31.89    1.26
   0  -4   3   33.94    1.56
   0  -4   3   34.79    1.58
   0  -4   3   30.30    1.57
   0  -4   3   32.78    1.63
  -1   4  -3  112.67    3.08
  -1   4  -3  114.67    3.09
  -1   4  -3  113.77    2.97
  -1   4  -3  112.90    3.40
  -1   4  -3  119.20    3.79
  -1   4  -3  104.37    3.38
  -1   4  -3  117.50    3.09
  -1   4  -3  118.61    3.59
  -1   4  -3  112.84    3.43
  -1   4  -3  116.86    3.53
  -1   4  -3  120.08    3.65
   1  -4   3  117.26    2.94
   1  -4   3  105.27    3.10
   1  -4   3  117.96    3.54
   1  -4   3  107.90    3.23
   1  -4   3  115.23    3.36
   1  -4   3  106.56    3.45
   1  -4   3  117.14    3.55
   1  -4   3  113.18    3.08
   1  -4   3  117.35    3.43
   1  -4   3  118.14    3.59
   1  -4   3  113.12    3.69
   1  -4   3  115.18    2.93
   1  -4   3  118.16    3.52
   1  -4   3  113.43    2.85
  -2   4  -3  118.76    3.35
  -2   4  -3  112.73    3.08
  -2   4  -3   99.27    3.19
  -2   4  -3  117.50    3.34
  -2   4  -3  107.69    3.18
  -2   4  -3  107.91    2.85
  -2   4  -3  110.71    3.26
  -2   4  -3  109.76    2.87
  -2   4  -3  113.22    3.01
  -2   4  -3  106.53    2.95
  -2   4  -3  111.10    3.44
   2  -4   3  112.42    3.40
   2  -4   3  112.84    2.97
   2  -4   3  120.69    3.53
   2  -4   3  111.42    3.31
   2  -4   3  109.96    3.29
   2  -4   3  113.58    2.78
   2  -4   3  111.75    3.29
   2  -4   3  107.33    2.78
   2  -4   3  109.57    2.76
   2  -4   3  112.26    3.29
   2  -4   3  111.58    3.11
   2  -4   3  111.19    2.92
   2  -4   3  110.81    3.04
  -3   4  -3  389.65    8.51
  -3   4  -3  378.14    8.52
  -3   4  -3  385.15    8.81
  -3   4  -3  374.80    7.87
  -3   4  -3  370.05    7.75
  -3   4  -3  369.70    8.76
  -3   4  -3  391.17    8.36
  -3   4  -3  381.31    8.50
  -3   4  -3  373.71    9.24
  -3   4  -3  376.61    8.02
  -3   4  -3  368.60    7.88
  -3   4  -3  370.12    8.83
   3  -4   3  377.97    8.93
   3  -4   3  375.80    8.09
   3  -4   3  368.99    8.83
   3  -4   3  377.48    8.87
   3  -4   3  391.79    8.11
   3  -4   3  376.97    8.22
   3  -4   3  394.99    8.00
   3  -4   3  382.00    8.38
   3  -4   3  374.51    8.93
   3  -4   3  385.25    7.77
   3  -4   3  394.41    9.29
   3  -4   3  374.66    7.86
   3  -4   3  373.07    9.20
  -4   4  -3  401.38    9.78
  -4   4  -3  390.39    9.18
  -4   4  -3  392.02    8.41
  -4   4  -3  401.42    8.75
  -4   4  -3  404.05    8.93
  -4   4  -3  388.27    9.23
  -4   4  -3  419.86    8.97
  -4   4  -3  388.43    8.79
  -4   4  -3  384.57    9.26
  -4   4  -3  402.67    7.95
  -4   4  -3  390.72    8.29
   4  -4   3  382.92    8.52
   4  -4   3  399.56    8.62
   4  -4   3  391.25    8.08
   4  -4   3  388.72    9.36
   4  -4   3  386.31    9.29
   4  -4   3  383.99    8.03
   4  -4   3  390.04    7.71
   4  -4   3  390.65    8.05
   4  -4   3  407.81    9.37
   4  -4   3  388.86    9.68
   4  -4   3  400.81    8.34
   4  -4   3  375.70    9.31
  -5   4  -3  205.12    5.86
  -5   4  -3  204.28    5.52
  -5   4  -3  199.56    4.88
  -5   4  -3  196.30    4.99
  -5   4  -3  207.56    5.26
  -5   4  -3  204.59    5.21
  -5   4  -3  200.83    5.53
   5  -4   3  208.93    4.71
   5  -4   3  197.85    4.41
   5  -4   3  197.24    4.60
   5  -4   3  207.50    5.64
   5  -4   3  201.44    5.56
   5  -4   3  200.87    5.56
   5  -4   3  204.45    5.07
   5  -4   3  202.57    4.80
   5  -4   3  206.56    5.80
   5  -4   3  201.58    4.23
   5  -4   3  203.47    5.57
   5  -4   3  200.90    4.91
  -6   4  -3   68.58    2.38
  -6   4  -3   61.57    2.65
  -6   4  -3   64.69    2.48
  -6   4  -3   65.80    2.47
   6  -4   3   68.66    2.86
   6  -4   3   64.58    2.36
   6  -4   3   67.10    2.77
   6  -4   3   66.98    2.38
   6  -4   3   66.54    2.17
   6  -4   3   65.92    2.73
   6  -4   3   64.89    1.99
   6  -4   3   69.52    2.79
   6  -4   3   65.33    1.78
  -7   4  -3   14.06    1.47
  -7   4  -3   17.39    1.57
  -7   4  -3   14.92    1.35
   7  -4   3   13.58    0.92
   7  -4   3   14.01    1.02
   7  -4   3   11.98    1.37
   7  -4   3   15.42    1.39
   7  -4   3   15.14    1.59
   7  -4   3   13.93    1.57
  -8   4  -3    0.91    0.54
  -8   4  -3    0.57    0.55
  -8   4  -3    0.74    0.52
   8  -4   3    2.24    0.79
   8  -4   3    1.39    0.61
   8  -4   3    1.44    0.76
   8  -4   3    1.86    0.81
  -9   4  -3   12.71    1.61
   9  -4   3   12.86    1.48
   9  -4   3   13.34    1.72
   9  -4   3   11.86    1.71
 -10   4  -3   31.72    2.35
  10  -4   3   32.43    2.76
   9   3  -3   12.20    1.84
  -9  -3   3    9.97    1.65
   8   3  -3    1.54    0.60
   8   3  -3    3.03    0.84
   8   3  -3    1.41    0.78
  -8  -3   3    1.96    0.86
   7   3  -3   -0.26    0.52
   7   3  -3    0.39    0.43
   7   3  -3    0.22    0.50
   7   3  -3   -0.03    0.45
  -7  -3   3    0.69    0.59
   6   3  -3   14.88    1.42
   6   3  -3   14.08    1.19
   6   3  -3   16.43    1.32
   6   3  -3   18.93    1.96
   6   3  -3   15.67    1.62
  -6  -3   3   15.49    1.53
  -6  -3   3   11.62    1.41
   5   3  -3   41.99    1.99
   5   3  -3   46.30    2.34
   5   3  -3   44.81    2.48
   5   3  -3   46.36    2.36
   5   3  -3   41.81    1.96
   5   3  -3   45.29    2.17
  -5  -3   3   43.66    2.11
  -5  -3   3   43.56    2.07
  -5  -3   3   44.95    2.50
  -5  -3   3   38.16    2.15
   4   3  -3  130.65    4.21
   4   3  -3  130.24    4.15
   4   3  -3  125.83    4.37
   4   3  -3  124.71    3.77
   4   3  -3  126.86    4.21
   4   3  -3  128.53    3.69
   4   3  -3  123.95    4.12
   4   3  -3  129.29    4.17
   4   3  -3  123.92    3.77
  -4  -3   3  121.72    4.32
  -4  -3   3  127.16    4.09
  -4  -3   3  125.08    3.69
  -4  -3   3  126.89    4.20
  -4  -3   3  126.42    3.87
  -4  -3   3  131.84    4.15
  -4  -3   3  125.88    4.19
  -4  -3   3  132.31    3.14
   3   3  -3  102.53    3.36
   3   3  -3  101.93    3.15
   3   3  -3  105.88    3.48
   3   3  -3  110.22    3.20
   3   3  -3  108.60    3.44
   3   3  -3  101.83    3.60
   3   3  -3  107.57    3.52
   3   3  -3  109.34    3.09
  -3  -3   3  104.39    3.46
  -3  -3   3  104.79    3.41
  -3  -3   3  103.15    3.62
  -3  -3   3  105.28    3.09
  -3  -3   3  104.47    2.50
  -3  -3   3  111.47    3.55
  -3  -3   3  107.76    3.47
  -3  -3   3  103.96    3.17
   2   3  -3  113.17    3.05
   2   3  -3  111.06    3.42
   2   3  -3  111.62    3.40
   2   3  -3  114.90    3.14
   2   3  -3  121.82    3.25
   2   3  -3  116.56    3.39
   2   3  -3  114.12    3.48
   2   3  -3  113.02    3.41
   2   3  -3  111.85    3.45
   2   3  -3  112.58    3.61
  -2  -3   3  115.58    3.42
  -2  -3   3  115.37    3.45
  -2  -3   3  111.54    3.42
  -2  -3   3  108.77    2.96
  -2  -3   3  110.72    3.46
  -2  -3   3  109.54    3.07
   1   3  -3  290.10    6.81
   1   3  -3  276.09    6.20
   1   3  -3  277.10    6.73
   1   3  -3  277.38    5.96
   1   3  -3  276.66    6.36
   1   3  -3  275.38    6.73
   1   3  -3  278.62    6.76
   1   3  -3  273.69    6.07
   1   3  -3  273.30    5.74
   1   3  -3  276.34    6.74
   1   3  -3  275.74    6.37
   1   3  -3  284.34    7.08
  -1  -3   3  278.41    6.31
  -1  -3   3  277.67    6.11
  -1  -3   3  282.32    6.81
  -1  -3   3  269.89    6.75
  -1  -3   3  271.64    5.88
  -1  -3   3  270.75    6.99
  -1  -3   3  278.95    6.74
  -1  -3   3  277.60    6.69
  -1  -3   3  288.97    6.40
   0   3  -3  146.13    3.46
   0   3  -3  147.87    3.89
   0   3  -3  138.09    3.96
   0   3  -3  141.17    3.31
   0   3  -3  143.72    3.96
   0   3  -3  142.26    3.97
   0   3  -3  142.88    3.48
   0   3  -3  137.74    3.96
   0   3  -3  143.49    3.85
   0  -3   3  140.43    3.59
   0  -3   3  148.23    3.26
   0  -3   3  144.74    3.99
   0  -3   3  149.38    3.51
   0  -3   3  143.54    3.39
   0  -3   3  146.52    3.79
   0  -3   3  140.32    3.87
   0  -3   3  133.63    3.91
   0  -3   3  141.42    3.96
   0  -3   3  137.25    4.16
   0  -3   3  139.12    3.91
  -1   3  -3  190.40    4.69
  -1   3  -3  194.78    4.73
  -1   3  -3  186.94    4.91
  -1   3  -3  190.57    4.26
  -1   3  -3  188.13    4.11
  -1   3  -3  191.19    4.71
  -1   3  -3  187.41    4.40
  -1   3  -3  184.57    4.60
  -1   3  -3  176.96    4.91
  -1   3  -3  193.10    4.76
  -1   3  -3  191.36    4.32
  -1   3  -3  181.92    4.22
  -1   3  -3  189.69    4.24
   1  -3   3  184.66    4.92
   1  -3   3  188.30    4.33
   1  -3   3  180.28    4.59
   1  -3   3  188.75    4.21
   1  -3   3  188.49    4.15
   1  -3   3  194.74    4.12
   1  -3   3  186.80    4.71
   1  -3   3  183.45    4.11
   1  -3   3  185.81    3.97
   1  -3   3  195.23    4.76
   1  -3   3  189.56    4.11
   1  -3   3  188.56    4.85
   1  -3   3  182.71    4.70
   1  -3   3  191.87    4.26
   1  -3   3  186.54    4.68
   1  -3   3  182.77    4.72
  -2   3  -3   36.93    1.31
  -2   3  -3   38.30    1.30
  -2   3  -3   37.83    1.43
  -2   3  -3   38.88    1.22
  -2   3  -3   39.57    1.50
  -2   3  -3   40.75    1.35
  -2   3  -3   36.97    1.26
  -2   3  -3   39.79    1.32
  -2   3  -3   39.89    1.27
  -2   3  -3   37.96    1.21
  -2   3  -3   38.54    1.45
  -2   3  -3   38.29    1.26
  -2   3  -3   38.49    1.41
   2  -3   3   38.42    1.24
   2  -3   3   38.74    1.44
   2  -3   3   39.56    1.17
   2  -3   3   38.73    1.46
   2  -3   3   38.77    1.27
   2  -3   3   39.78    1.43
   2  -3   3   36.91    1.22
   2  -3   3   38.76    1.48
   2  -3   3   38.36    1.50
   2  -3   3   38.00    1.45
   2  -3   3   38.63    0.96
   2  -3   3   40.97    1.29
  -3   3  -3    0.09    0.21
  -3   3  -3    0.23    0.17
  -3   3  -3    0.89    0.25
  -3   3  -3    0.52    0.23
  -3   3  -3    0.69    0.25
  -3   3  -3    0.61    0.19
  -3   3  -3    0.60    0.23
  -3   3  -3    0.64    0.17
  -3   3  -3    0.59    0.22
  -3   3  -3    0.85    0.28
  -3   3  -3    0.32    0.22
  -3   3  -3    0.48    0.23
  -3   3  -3    0.55    0.27
   3  -3   3    0.00    0.14
   3  -3   3    0.17    0.16
   3  -3   3    0.98    0.28
   3  -3   3    0.29    0.24
   3  -3   3    0.38    0.25
   3  -3   3    0.69    0.26
   3  -3   3    0.67    0.25
   3  -3   3    0.62    0.28
   3  -3   3    0.34    0.22
   3  -3   3    0.55    0.19
   3  -3   3    0.35    0.18
  -4   3  -3    0.72    0.33
  -4   3  -3    0.74    0.30
  -4   3  -3    0.55    0.25
  -4   3  -3    0.57    0.26
  -4   3  -3    0.22    0.27
  -4   3  -3    0.51    0.27
  -4   3  -3    0.23    0.22
  -4   3  -3    0.44    0.25
  -4   3  -3    1.01    0.31
   4  -3   3    0.91    0.27
   4  -3   3    0.26    0.21
   4  -3   3    0.55    0.25
   4  -3   3    0.70    0.24
   4  -3   3    0.42    0.24
   4  -3   3    0.56    0.30
   4  -3   3    0.19    0.27
   4  -3   3    1.01    0.31
   4  -3   3    0.35    0.29
   4  -3   3    0.69    0.33
   4  -3   3    0.94    0.24
   4  -3   3    0.63    0.19
  -5   3  -3   15.42    1.10
  -5   3  -3   14.92    0.96
  -5   3  -3   14.06    0.99
  -5   3  -3   15.79    0.63
  -5   3  -3   16.54    1.04
  -5   3  -3   15.00    1.10
  -5   3  -3   16.18    1.21
  -5   3  -3   16.48    0.99
  -5   3  -3   16.34    0.89
   5  -3   3   17.23    1.12
   5  -3   3   16.19    1.14
   5  -3   3   16.02    1.05
   5  -3   3   17.41    1.21
   5  -3   3   15.87    0.87
   5  -3   3   16.30    0.86
   5  -3   3   15.58    1.14
   5  -3   3   13.28    0.92
   5  -3   3   16.06    1.16
   5  -3   3   16.96    0.83
   5  -3   3   16.77    1.14
   5  -3   3   15.87    0.59
   5  -3   3   14.62    0.94
  -6   3  -3   98.59    2.75
  -6   3  -3   90.98    3.02
  -6   3  -3   97.52    2.96
  -6   3  -3   90.83    3.32
  -6   3  -3   93.59    2.44
   6  -3   3  102.80    3.50
   6  -3   3   95.84    2.97
   6  -3   3   97.44    3.06
   6  -3   3   97.71    3.40
   6  -3   3   94.97    2.61
   6  -3   3   94.47    2.86
   6  -3   3   94.07    3.39
   6  -3   3   98.45    3.53
   6  -3   3   96.78    2.68
  -7   3  -3   85.97    3.07
  -7   3  -3   90.61    2.99
  -7   3  -3   77.41    3.27
   7  -3   3   81.56    2.79
   7  -3   3   85.57    2.57
   7  -3   3   83.29    3.37
   7  -3   3   84.39    2.94
   7  -3   3   87.86    2.94
   7  -3   3   83.47    3.43
   7  -3   3   87.59    3.42
  -8   3  -3  112.40    3.81
  -8   3  -3  105.51    3.60
  -8   3  -3  105.45    4.14
   8  -3   3  103.06    3.55
   8  -3   3  102.48    3.54
   8  -3   3  109.91    4.20
   8  -3   3  105.55    4.17
   8  -3   3  103.57    4.19
   8  -3   3  104.91    3.81
  -9   3  -3   47.90    2.59
   9  -3   3   43.39    2.73
   9  -3   3   44.08    2.77
   9  -3   3   47.83    2.45
 -10   3  -3   23.26    2.23
  10  -3   3   21.29    2.37
   9   2  -3   36.55    2.60
  -9  -2   3   36.60    2.55
   8   2  -3   77.26    3.42
   8   2  -3   75.23    2.89
   8   2  -3   73.97    3.16
  -8  -2   3   71.23    3.28
   7   2  -3   49.65    2.55
   7   2  -3   53.58    2.30
   7   2  -3   51.70    2.44
   7   2  -3   50.17    2.72
   7   2  -3   44.79    2.21
  -7  -2   3   49.35    2.48
   6   2  -3   61.83    2.51
   6   2  -3   60.33    2.78
   6   2  -3   57.69    2.42
   6   2  -3   63.23    2.95
   6   2  -3   61.13    2.87
   6   2  -3   60.38    3.00
   6   2  -3   60.38    2.59
   6   2  -3   55.84    2.27
  -6  -2   3   59.26    2.54
  -6  -2   3   59.08    2.77
   5   2  -3   57.22    2.49
   5   2  -3   54.94    2.22
   5   2  -3   55.14    2.30
   5   2  -3   56.02    2.55
   5   2  -3   58.07    2.54
   5   2  -3   56.52    2.55
   5   2  -3   55.22    2.25
   5   2  -3   54.31    2.54
   5   2  -3   54.63    2.64
  -5  -2   3   57.14    2.29
  -5  -2   3   65.74    3.10
  -5  -2   3   57.02    2.50
  -5  -2   3   56.60    2.55
  -5  -2   3   53.75    2.68
  -5  -2   3   56.12    2.58
  -5  -2   3   53.51    2.29
   4   2  -3   24.90    1.31
   4   2  -3   22.24    1.37
   4   2  -3   24.09    1.53
   4   2  -3   23.37    1.33
   4   2  -3   24.01    1.45
   4   2  -3   23.88    1.41
   4   2  -3   23.29    1.51
   4   2  -3   23.54    1.45
   4   2  -3   26.69    1.52
   4   2  -3   23.95    1.30
  -4  -2   3   25.61    1.50
  -4  -2   3   24.34    1.43
  -4  -2   3   23.84    1.30
  -4  -2   3   25.33    1.34
  -4  -2   3   24.89    1.48
  -4  -2   3   25.73    1.59
  -4  -2   3   25.03    1.52
   3   2  -3   26.25    1.24
   3   2  -3   30.50    1.43
   3   2  -3   29.16    1.47
   3   2  -3   29.57    1.47
   3   2  -3   28.71    1.33
   3   2  -3   28.01    1.30
   3   2  -3   28.06    1.40
   3   2  -3   28.07    1.50
   3   2  -3   26.61    1.41
   3   2  -3   27.79    1.47
  -3  -2   3   26.77    1.41
  -3  -2   3   28.24    1.41
  -3  -2   3   26.97    1.40
  -3  -2   3   28.01    1.23
  -3  -2   3   26.37    1.25
  -3  -2   3   27.76    1.45
  -3  -2   3   29.79    1.32
   2   2  -3   10.29    0.68
   2   2  -3    9.52    0.74
   2   2  -3    9.62    0.75
   2   2  -3   10.03    0.69
   2   2  -3   10.17    0.74
   2   2  -3   10.80    0.82
   2   2  -3    9.83    0.73
   2   2  -3    9.21    0.76
   2   2  -3    8.88    0.64
   2   2  -3    8.56    0.71
  -2  -2   3    8.52    0.63
  -2  -2   3    9.20    0.62
  -2  -2   3    9.95    0.52
  -2  -2   3    7.41    0.65
  -2  -2   3    9.02    0.64
  -2  -2   3    8.30    0.72
  -2  -2   3    9.08    0.75
  -2  -2   3    9.76    0.74
  -2  -2   3    9.76    0.73
  -2  -2   3    8.20    0.73
  -2  -2   3    9.61    0.74
   1   2  -3    5.01    0.55
   1   2  -3    4.28    0.47
   1   2  -3    4.44    0.36
   1   2  -3    5.25    0.58
   1   2  -3    4.20    0.50
   1   2  -3    4.92    0.56
   1   2  -3    4.73    0.51
   1   2  -3    4.82    0.57
   1   2  -3    2.70    0.40
   1   2  -3    4.21    0.39
   1   2  -3    3.49    0.40
   1   2  -3    4.75    0.56
  -1  -2   3    4.71    0.50
  -1  -2   3    4.11    0.44
  -1  -2   3    5.14    0.60
  -1  -2   3    3.77    0.49
  -1  -2   3    4.09    0.52
  -1  -2   3    4.76    0.45
  -1  -2   3    4.57    0.39
  -1  -2   3    4.11    0.52
  -1  -2   3    5.06    0.55
   0   2  -3   10.75    0.64
   0   2  -3   11.72    0.71
   0   2  -3   11.72    0.65
   0   2  -3   10.30    0.55
   0   2  -3   10.93    0.47
   0   2  -3   10.54    0.57
   0   2  -3   10.94    0.63
   0   2  -3   10.50    0.50
   0   2  -3   11.24    0.64
   0   2  -3    9.57    0.66
   0   2  -3   10.39    0.64
   0   2  -3    9.10    0.62
   0  -2   3   11.06    0.60
   0  -2   3    9.97    0.67
   0  -2   3   10.33    0.67
   0  -2   3   10.74    0.70
   0  -2   3   11.04    0.57
   0  -2   3    9.83    0.61
   0  -2   3    9.87    0.62
   0  -2   3   11.29    0.76
   0  -2   3   11.28    0.46
   0  -2   3   10.01    0.61
   0  -2   3   10.39    0.67
   0  -2   3    9.92    0.50
   0  -2   3    8.66    0.68
  -1   2  -3  119.04    2.71
  -1   2  -3  121.13    2.94
  -1   2  -3  122.25    2.58
  -1   2  -3  119.80    3.14
  -1   2  -3  118.96    2.71
  -1   2  -3  119.85    3.08
  -1   2  -3  120.18    3.08
  -1   2  -3  123.51    2.94
  -1   2  -3  118.97    2.63
  -1   2  -3  119.71    2.71
  -1   2  -3  116.96    2.99
  -1   2  -3  120.53    3.01
  -1   2  -3  119.54    2.79
  -1   2  -3  120.12    2.58
   1  -2   3  123.68    2.64
   1  -2   3  122.72    2.98
   1  -2   3  119.24    3.01
   1  -2   3  120.64    2.93
   1  -2   3  120.13    2.37
   1  -2   3  125.48    3.02
   1  -2   3  121.86    2.56
   1  -2   3  125.73    2.92
   1  -2   3  118.26    3.08
   1  -2   3  127.71    3.06
   1  -2   3  122.60    3.11
   1  -2   3  120.79    2.98
   1  -2   3  121.46    2.62
   1  -2   3  120.68    2.58
  -2   2  -3  235.01    4.83
  -2   2  -3  235.16    5.48
  -2   2  -3  248.85    4.99
  -2   2  -3  240.91    5.33
  -2   2  -3  241.54    5.01
  -2   2  -3  242.37    5.54
  -2   2  -3  256.77    5.82
  -2   2  -3  244.36    5.17
  -2   2  -3  246.62    5.52
  -2   2  -3  247.94    5.39
  -2   2  -3  239.52    5.33
  -2   2  -3  249.34    5.42
  -2   2  -3  239.78    4.93
   2  -2   3  249.27    5.07
   2  -2   3  241.33    5.38
   2  -2   3  246.01    4.92
   2  -2   3  248.49    5.55
   2  -2   3  247.06    5.74
   2  -2   3  250.16    5.61
   2  -2   3  250.79    5.78
   2  -2   3  246.11    4.96
   2  -2   3  236.67    5.54
   2  -2   3  246.61    4.69
   2  -2   3  244.42    5.55
  -3   2  -3  186.08    4.14
  -3   2  -3  180.23    3.64
  -3   2  -3  177.83    3.99
  -3   2  -3  185.15    4.67
  -3   2  -3  175.49    3.90
  -3   2  -3  169.67    4.20
  -3   2  -3  178.95    4.14
  -3   2  -3  188.72    4.44
  -3   2  -3  182.30    4.21
  -3   2  -3  187.00    4.14
  -3   2  -3  173.14    4.41
  -3   2  -3  181.23    4.31
   3  -2   3  181.47    3.69
   3  -2   3  184.33    3.93
   3  -2   3  177.25    3.97
   3  -2   3  183.62    4.22
   3  -2   3  182.92    4.48
   3  -2   3  184.36    4.61
   3  -2   3  177.17    4.44
   3  -2   3  184.65    4.38
   3  -2   3  179.65    4.47
   3  -2   3  183.52    4.48
   3  -2   3  179.17    4.27
   3  -2   3  180.08    4.21
   3  -2   3  179.24    3.92
   3  -2   3  184.43    3.71
  -4   2  -3  140.96    3.53
  -4   2  -3  141.97    3.57
  -4   2  -3  141.21    3.07
  -4   2  -3  145.56    4.02
  -4   2  -3  139.25    3.33
  -4   2  -3  137.57    3.44
  -4   2  -3  132.91    3.41
  -4   2  -3  137.07    3.76
  -4   2  -3  135.68    3.78
   4  -2   3  138.12    3.35
   4  -2   3  139.85    3.82
   4  -2   3  136.46    3.54
   4  -2   3  140.33    3.95
   4  -2   3  142.35    3.74
   4  -2   3  141.21    3.62
   4  -2   3  134.69    3.82
   4  -2   3  134.50    3.78
   4  -2   3  139.68    3.05
   4  -2   3  140.38    3.12
   4  -2   3  133.55    3.80
  -5   2  -3  189.63    4.84
  -5   2  -3  189.32    5.11
  -5   2  -3  188.21    4.79
  -5   2  -3  187.34    4.49
  -5   2  -3  191.80    4.55
  -5   2  -3  189.39    4.24
  -5   2  -3  191.10    4.64
   5  -2   3  188.67    4.78
   5  -2   3  189.61    5.14
   5  -2   3  191.85    4.10
   5  -2   3  184.70    5.10
   5  -2   3  181.76    4.48
   5  -2   3  185.02    4.74
   5  -2   3  184.50    5.12
   5  -2   3  190.19    5.30
   5  -2   3  188.44    4.21
  -6   2  -3  173.21    5.12
  -6   2  -3  176.75    4.49
  -6   2  -3  171.19    4.59
  -6   2  -3  175.85    4.38
   6  -2   3  174.34    5.29
   6  -2   3  171.18    4.67
   6  -2   3  173.75    5.14
   6  -2   3  170.25    4.72
   6  -2   3  174.21    3.96
   6  -2   3  178.93    4.52
   6  -2   3  175.60    5.15
   6  -2   3  179.48    4.13
   6  -2   3  179.29    5.18
  -7   2  -3   75.01    2.70
  -7   2  -3   77.12    3.16
  -7   2  -3   73.39    2.81
   7  -2   3   77.46    2.74
   7  -2   3   75.07    2.78
   7  -2   3   75.52    3.12
   7  -2   3   72.27    3.12
   7  -2   3   74.50    2.80
   7  -2   3   68.60    3.09
  -8   2  -3   10.49    1.34
  -8   2  -3    9.18    1.19
  -8   2  -3    9.84    1.44
   8  -2   3   11.69    1.63
   8  -2   3    7.62    1.27
   8  -2   3   10.27    1.41
   8  -2   3    9.11    1.18
   8  -2   3   10.03    1.23
   8  -2   3    6.75    1.03
  -9   2  -3    9.58    1.40
   9  -2   3    9.46    1.27
   9  -2   3    8.26    1.43
   9  -2   3   10.53    1.63
 -10   2  -3   11.21    1.66
  10  -2   3    9.47    1.77
   9   1  -3   57.41    3.08
  -9  -1   3   59.84    3.10
   8   1  -3   14.34    1.67
   8   1  -3   14.74    1.45
   8   1  -3   16.89    1.71
  -8  -1   3   15.46    1.75
   7   1  -3    0.32    0.38
   7   1  -3   -0.65    0.48
   7   1  -3    0.71    0.49
   7   1  -3    0.76    0.51
   7   1  -3   -0.06    0.45
   7   1  -3   -0.07    0.42
  -7  -1   3    0.45    0.51
   6   1  -3   26.83    1.75
   6   1  -3   25.05    1.77
   6   1  -3   25.14    1.78
   6   1  -3   28.77    1.62
   6   1  -3   26.88    1.66
   6   1  -3   27.17    1.91
   6   1  -3   26.76    1.37
   6   1  -3   24.74    1.50
  -6  -1   3   25.48    1.73
  -6  -1   3   26.36    1.60
  -6  -1   3   27.48    1.65
   5   1  -3   79.78    2.42
   5   1  -3   78.68    2.71
   5   1  -3   80.24    2.66
   5   1  -3   76.73    2.99
   5   1  -3   78.93    2.76
   5   1  -3   79.56    2.96
   5   1  -3   77.10    3.11
   5   1  -3   82.38    3.06
   5   1  -3   77.46    2.95
   5   1  -3   78.37    2.99
  -5  -1   3   75.06    2.96
  -5  -1   3   81.27    2.81
  -5  -1   3   80.71    3.06
  -5  -1   3   77.01    3.11
  -5  -1   3   79.96    2.81
  -5  -1   3   75.09    2.95
  -5  -1   3   79.74    2.97
  -5  -1   3   79.17    2.68
   4   1  -3  133.48    4.03
   4   1  -3  136.62    3.50
   4   1  -3  141.88    3.72
   4   1  -3  137.10    3.99
   4   1  -3  142.70    3.88
   4   1  -3  139.93    4.06
   4   1  -3  134.42    4.08
   4   1  -3  135.55    3.60
   4   1  -3  136.29    4.07
   4   1  -3  139.20    4.04
  -4  -1   3  136.64    4.03
  -4  -1   3  137.51    3.82
  -4  -1   3  137.64    3.84
  -4  -1   3  143.58    4.16
  -4  -1   3  139.61    3.67
  -4  -1   3  131.23    4.23
  -4  -1   3  140.29    4.08
  -4  -1   3  139.10    4.13
   3   1  -3  320.53    7.66
   3   1  -3  323.82    6.82
   3   1  -3  323.33    7.46
   3   1  -3  332.95    6.93
   3   1  -3  329.07    6.98
   3   1  -3  324.95    7.70
   3   1  -3  322.44    7.74
   3   1  -3  336.73    7.72
   3   1  -3  315.98    7.71
   3   1  -3  322.18    7.40
  -3  -1   3  311.43    7.75
  -3  -1   3  337.18    7.74
  -3  -1   3  313.34    7.64
  -3  -1   3  329.76    7.25
  -3  -1   3  325.50    6.86
  -3  -1   3  329.98    6.96
  -3  -1   3  335.60    7.75
  -3  -1   3  331.15    7.71
   2   1  -3  311.17    7.08
   2   1  -3  306.35    7.02
   2   1  -3  309.36    7.38
   2   1  -3  302.62    6.83
   2   1  -3  312.98    6.39
   2   1  -3  308.01    6.77
   2   1  -3  309.71    7.04
   2   1  -3  307.85    7.04
   2   1  -3  309.83    6.31
  -2  -1   3  299.09    6.70
  -2  -1   3  301.36    6.56
  -2  -1   3  311.11    7.09
  -2  -1   3  304.75    6.78
  -2  -1   3  303.73    7.36
  -2  -1   3  313.49    6.37
  -2  -1   3  310.45    7.13
  -2  -1   3  309.74    6.61
  -2  -1   3  309.71    7.06
  -2  -1   3  303.34    7.02
  -2  -1   3  307.02    6.27
   1   1  -3  180.93    3.80
   1   1  -3  185.76    4.20
   1   1  -3  178.61    4.20
   1   1  -3  183.31    4.20
   1   1  -3  178.64    4.20
   1   1  -3  183.28    3.79
   1   1  -3  179.83    4.19
   1   1  -3  179.28    4.06
   1   1  -3  177.13    4.37
   1   1  -3  179.92    3.72
   1   1  -3  180.51    4.00
   1   1  -3  174.42    4.02
  -1  -1   3  188.33    3.77
  -1  -1   3  174.98    4.35
  -1  -1   3  178.75    3.99
  -1  -1   3  185.07    4.07
  -1  -1   3  181.60    3.90
  -1  -1   3  182.29    4.20
  -1  -1   3  178.71    3.75
  -1  -1   3  182.40    4.23
  -1  -1   3  179.30    4.20
  -1  -1   3  181.32    4.17
  -1  -1   3  187.87    3.93
  -1  -1   3  181.79    3.79
  -1  -1   3  187.59    4.23
   0   1  -3   39.56    1.14
   0   1  -3   39.36    1.10
   0   1  -3   39.65    1.03
   0   1  -3   38.64    1.19
   0   1  -3   38.72    0.91
   0   1  -3   40.41    1.04
   0   1  -3   40.72    1.05
   0   1  -3   38.43    0.91
   0   1  -3   37.80    1.00
   0   1  -3   37.58    1.15
   0   1  -3   40.89    1.09
   0  -1   3   38.65    0.85
   0  -1   3   38.69    1.17
   0  -1   3   39.24    0.97
   0  -1   3   40.00    1.12
   0  -1   3   38.26    1.09
   0  -1   3   36.40    1.05
   0  -1   3   39.00    1.20
   0  -1   3   39.06    1.04
   0  -1   3   41.35    0.99
   0  -1   3   39.12    1.09
   0  -1   3   39.26    1.32
   0  -1   3   39.60    0.92
   0  -1   3   39.59    1.09
  -1   1  -3   57.63    1.19
  -1   1  -3   57.27    1.34
  -1   1  -3   58.58    1.42
  -1   1  -3   56.11    1.45
  -1   1  -3   56.49    1.24
  -1   1  -3   57.37    1.40
  -1   1  -3   55.61    1.57
  -1   1  -3   58.78    1.60
  -1   1  -3   54.91    1.39
   1  -1   3   56.56    1.40
   1  -1   3   56.82    1.38
   1  -1   3   57.88    1.59
   1  -1   3   58.71    1.60
  -2   1  -3   21.41    0.78
  -2   1  -3   19.65    0.87
  -2   1  -3   21.06    0.63
  -2   1  -3   21.60    0.70
  -2   1  -3   22.00    0.88
  -2   1  -3   22.95    0.85
  -2   1  -3   19.69    0.69
  -2   1  -3   20.29    0.77
  -2   1  -3   21.11    0.63
   2  -1   3   21.05    0.65
   2  -1   3   19.91    0.79
   2  -1   3   21.94    0.80
   2  -1   3   21.40    0.76
   2  -1   3   20.62    0.88
   2  -1   3   21.50    0.75
   2  -1   3   21.30    0.92
   2  -1   3   20.96    0.89
   2  -1   3   21.40    0.64
   2  -1   3   21.52    0.77
   2  -1   3   20.73    0.81
  -3   1  -3   10.74    0.62
  -3   1  -3   11.77    0.55
  -3   1  -3   10.98    0.67
  -3   1  -3   11.76    0.59
  -3   1  -3   11.31    0.63
  -3   1  -3   12.38    0.61
  -3   1  -3   11.77    0.52
  -3   1  -3   11.24    0.69
  -3   1  -3   13.00    0.77
  -3   1  -3   11.15    0.63
  -3   1  -3   11.54    0.69
  -3   1  -3   11.33    0.57
   3  -1   3   10.99    0.74
   3  -1   3   10.83    0.69
   3  -1   3   11.50    0.73
   3  -1   3   11.68    0.59
   3  -1   3   10.19    0.53
   3  -1   3   12.05    0.70
   3  -1   3   11.49    0.71
   3  -1   3   11.15    0.68
   3  -1   3    9.81    0.63
   3  -1   3   10.86    0.70
  -4   1  -3    3.02    0.49
  -4   1  -3    2.98    0.45
  -4   1  -3    3.36    0.57
  -4   1  -3    3.01    0.53
  -4   1  -3    2.34    0.40
  -4   1  -3    3.13    0.49
  -4   1  -3    3.12    0.45
  -4   1  -3    2.60    0.41
  -4   1  -3    3.08    0.45
   4  -1   3    3.18    0.53
   4  -1   3    2.34    0.46
   4  -1   3    2.78    0.53
   4  -1   3    4.01    0.38
   4  -1   3    2.38    0.46
   4  -1   3    3.68    0.33
   4  -1   3    3.15    0.54
   4  -1   3    3.16    0.53
   4  -1   3    2.65    0.43
   4  -1   3    2.60    0.47
  -5   1  -3    9.84    0.74
  -5   1  -3    9.92    0.78
  -5   1  -3    9.04    0.90
  -5   1  -3   10.25    0.74
  -5   1  -3   11.25    0.87
  -5   1  -3    9.69    0.77
  -5   1  -3    7.90    0.90
   5  -1   3    8.99    0.59
   5  -1   3   10.37    1.11
   5  -1   3    9.62    0.97
   5  -1   3    9.55    0.86
   5  -1   3    9.38    0.97
   5  -1   3    9.75    0.95
   5  -1   3    9.85    1.02
   5  -1   3    9.77    0.54
   5  -1   3    6.93    0.84
  -6   1  -3   26.79    1.33
  -6   1  -3   25.65    1.46
  -6   1  -3   25.78    1.60
  -6   1  -3   25.27    1.36
   6  -1   3   28.05    1.04
   6  -1   3   28.20    1.14
   6  -1   3   27.51    1.67
   6  -1   3   27.68    1.64
   6  -1   3   28.94    1.71
   6  -1   3   26.36    1.68
   6  -1   3   26.92    1.56
   6  -1   3   26.71    1.42
   6  -1   3   24.12    1.45
  -7   1  -3   18.82    1.33
  -7   1  -3   19.35    1.42
  -7   1  -3   19.35    1.54
   7  -1   3   20.97    1.64
   7  -1   3   17.77    1.58
   7  -1   3   18.47    1.41
   7  -1   3   20.35    1.48
   7  -1   3   18.13    1.33
   7  -1   3   20.56    1.61
  -8   1  -3   39.44    2.42
  -8   1  -3   36.87    2.03
  -8   1  -3   38.15    2.16
   8  -1   3   37.16    2.20
   8  -1   3   37.25    2.40
   8  -1   3   38.52    2.38
   8  -1   3   42.61    2.54
   8  -1   3   40.73    2.10
   8  -1   3   39.97    2.18
  -9   1  -3   60.80    2.99
   9  -1   3   58.97    3.26
   9  -1   3   62.86    3.35
   9  -1   3   59.11    3.04
   9  -1   3   59.92    2.88
  10   0  -3   11.37    1.68
 -10   0   3   12.98    1.88
   9   0  -3   17.77    1.45
   9   0  -3   21.23    2.15
  -9   0   3   18.71    2.01
   8   0  -3   48.90    2.45
   8   0  -3   51.87    2.66
   8   0  -3   55.89    2.91
   8   0  -3   49.20    2.37
  -8   0   3   48.91    2.54
   7   0  -3   75.66    2.96
   7   0  -3   84.22    3.43
   7   0  -3   80.85    3.39
   7   0  -3   75.97    3.03
   7   0  -3   79.53    2.98
   7   0  -3   78.06    2.52
  -7   0   3   82.82    3.12
   6   0  -3  103.72    3.42
   6   0  -3  105.54    3.39
   6   0  -3  100.29    3.82
   6   0  -3   96.48    3.84
   6   0  -3  100.58    3.24
   6   0  -3  104.54    3.66
   6   0  -3  101.27    3.72
   6   0  -3  100.81    3.64
   6   0  -3  101.00    3.73
   6   0  -3   98.54    2.81
  -6   0   3  103.40    3.77
  -6   0   3  101.51    3.72
  -6   0   3  102.61    3.94
  -6   0   3  105.42    3.49
  -6   0   3  100.73    3.32
  -6   0   3  104.79    3.71
   5   0  -3  149.36    4.00
   5   0  -3  146.16    3.57
   5   0  -3  150.59    4.48
   5   0  -3  151.26    4.77
   5   0  -3  148.25    4.49
[truncated: 10,163,969 more chars]
